# Supplementary material for: First Description of a Thermophilic, Endophytic <em>Aspergillus brasiliensis</em> Strain from a Volcanic Ecosystem: Genomic Analysis and Plant Growth Benefits
Source: Preprints.org preprint supplement (doi:10.20944/preprints202406.0871.v1), 2024-06-13
Supplement: Supplementary file 2 [file supplementary]

## Sheet: Sheet1
Supplementary data
First description of a thermophilic, endophytic Aspergillus brasiliensis strain from a volcanic ecosystem: Genomic analysis and plant growth benefits.
Martirena-Ramírez et al.
*Corresponding authors: Dr. Jorge Luis Folch Mallol, jordi@uaem.mx
Dr. Ramón Alberto Batista García, rabg@uaem.mx, rbatista25@yahoo.com

## Sheet: Data_set_S1
Dataset S1. NCBI non-redundant database annotation of E_15.1 predicted proteins
Gene ID	Target accession	Description of target	Species	sequence identity	target length	mismatches	gap openings	query start	query end	target start	target end	E-value	Bit score	Amino acid sequence
g1.t1	GAT25423.1	GAT25423.1 C-4 methylsterol oxidase [Aspergillus luchuensis]	Aspergillus luchuensis	98.3	121	2	0	1	121	45	165	4.83e-86	258	MAAEYASPIEVMILGFGTVGCPILWCAVTGDLHIFTMYIWIVLRLFQAIDAHSGYEFPWSLHHFLPFWAGADHHDLHHEKFVGNYSSSFRWWDYVLDTEYSPEAIKRRRENKAVKDTKKAQ
g2.t1	GCB19553.1	GCB19553.1 GTP-binding protein ypt2 [Aspergillus awamori]	Aspergillus awamori	73.8	875	90	5	1	758	1	853	0	1207	MYAINKLRQRLNDKSYPSLDFYEIASQGSYPAENVAKLERLMDSLSMTSKSQPLLQTEALLKLIAEYPKDVLTGDYTSPDVKVFMSHVVDTSWLVAAKAAVQTFGIILNTLSDDVLSLNDEMLYWDGVLESPWSLGLYMLQTSPVVLWSRVRRFWYNANSINYFRASGPPGWMQFYESVRQCVHSQSLHSWRGRILLPLSTAKSDVRQKRKSLSALKDVNASSIGILIRNCFSGEVGDKYSSDNGYCVFDESWQINVLEGVAMMKLLLEDVGKESVIWNYEEHLTTVINQEVSSVRMHYCSDLSSEGPKFVMSELGYILEELLPGYAKASATTINNSGRPHYLSEIALMSRNSLEADRASLERMVVDFVLDRCGPNMNNYDASDTQIITAKVREGDLTP…
g3.t1	XP_025566319.1	XP_025566319.1 AAA-domain-containing protein [Aspergillus vadensis CBS 113365]	Aspergillus vadensis CBS 113365	81.7	840	96	5	1	786	186	1021	0	1305	MGEDLRKPLERGTHNIQVRPTGLGGMNRQIEIINESLADFNPGRLNIVMPSFYEHSRGILLYGPKGTGKTALLEQIKTAGWRQTFHIGSSAFGRNIGDAESKLRNIFQEAMRCQPSAILIDQVEFIAPRRTSLDSQSLASVLCECVDATKNAFVLIVAATRHPNDVDDALRTPHRLATEIELHIPTAQDRAQILRAICGCPSPSLSDTLIDMIAEKTHGYVGADLFALLQLISRKARQRQTLESVPCFRDERIPTDNAVGGQSTQEPGTPIHIIDVDVLSALQETRPTAMREVFLETPKVRWSDIGGQHEIKRRLQKAVERPLKHPERMRRLNLNSKKGVLLYGPPGCSKTLTVKALATEAGLNFLAVKGAEILSMYVGESERALREIFRKARSARPSI…
g4.t1	OJJ76756.1	OJJ76756.1 hypothetical protein ASPBRDRAFT_113979 [Aspergillus brasiliensis CBS 101740]	Aspergillus brasiliensis CBS 101740	86.2	2462	10	4	1	2132	1	2462	0	4087	MATNKRKESRLPIPGITDWNPAEPVSSTLAANLVPHLSSQGDGTPGLTKEAFSQLRHELVEGRYSQLQLNDSISDVKKLVCIVLKAGLEPCIRDNRSELQGQLLDCLDIVQNAVDKAPLALLEVPDPEVLGRDAPIPLYSCLVVWLVHLFSTWDNERVEHRIDGILSSISNASHNHTRLWPLFVGITAFLQACTTELIDAIEAYQARARVTHVASSLVVNPNQPCTLDLDRLDLRCGYFKRSIRFQSYDQAVRLCLSMLTSAINAYASSNIPSQRQNLTWLANGYRRLWKLSVVWHCKSGTADIASKMQTFSQFLGFIKRFCDHVSYMSPKPQLAYNFLQTFAETLALDSLKQATDLQRNLSHAIDSFTNAFTSEENLMRAMRATMLHVKSNLALFNSL…
g5.t1	OJJ76758.1	OJJ76758.1 hypothetical protein ASPBRDRAFT_35915 [Aspergillus brasiliensis CBS 101740]	Aspergillus brasiliensis CBS 101740	100	188	0	0	1	188	1	188	4.50e-132	378	MATDHKTILVPPKRANTDYPLIDSDPHLRRVFGYARPSDYAVGGGMAAASPLAFWIMERVSPSHVGRGGFAPVMRLATAIGLIGGLHVVYQRSCNRFYGFTENSREADMDMKEMVDKVKKGESLYGTSKVSSYLQGVAARNSRYSELFIHVLPWFNLVNHDQHGVDTAKYYQQAERELEAERLKQASS
g6.t1	OJJ76759.1	OJJ76759.1 hypothetical protein ASPBRDRAFT_35916 [Aspergillus brasiliensis CBS 101740]	Aspergillus brasiliensis CBS 101740	98.2	272	3	1	1	270	1	272	6.34e-180	506	MEKDVGYLNPSMDQDDALFDYDAGLENTLQDIAVDPRKDEPIAAPVLGLDEKVTVAKQRRFTVKLDEGRLLSQAGIPKLRSTAKSKLKFKGKGHEFSDAARLLNFYQLWLDDLFPRAKFADGLAMIEKLGHSKRLQTMRREWIDEEKPRLSAADSEHTGQTRTPSPDAHDDSMPIGHLDEADATLTRGDSVTQAPPTHSLGGPSSLALGGAPQQDDLFVSDDESVPTELIDERAHDNDNDNDDDDLEALLREHEDGIIGNNNLGGPGTRA
g7.t1	OJJ76760.1	OJJ76760.1 hypothetical protein ASPBRDRAFT_112243 [Aspergillus brasiliensis CBS 101740]	Aspergillus brasiliensis CBS 101740	99.6	566	2	0	1	566	1	566	0	1043	MPPKKSTAKPAAASAAAAKGKQTTSTATTKAATKATTKKTTKVKNTTATATTAGKVPTGKRETPAKPKKTTKGRTVKSATAPKKGKTDDNLASKKQEAEPAKRGKRKAEVVNEVPARDLKKARVAKPRVTKPKPKVVINHAPTTRLNVYVCGEGSSGELGLGSAKNAVDVKRPRLNANLPADRVGVVQVAVGGMHCVALTHDNKILTWGVNDQGALGRDTAWDGGYKDINKADNESDSDSDDDIALNPYESIPTPIPSEAFPEDTVFVEVAAGDSSSFALTDDGQVFGWGTFRSNDGILGFDAAHKVQITPSLIPSLKKIKHLACGDNHVLALNDKGAVFSWGSGQQNQLGRRIIERNRLNGLQPREFGLPKNIVQIGCGAFHSFAIHKSGDVYAWGLN…
g8.t1	TQB68019.1	TQB68019.1 hypothetical protein MPDQ_004172 [Monascus purpureus]	Monascus purpureus	71.6	1693	378	17	1	1661	1	1622	0	2318	MASTNTGSLFGGGGLGATTQSSSLFGNASGTPGLTGGTSFAKQSQAQQQPTSSSIFGQDQAQANAAQPSTQTTQPAFFNSLLERGKKRPISAIGQNGNFEELPSLQLGLDDIRRKARELGAGGPKDFQHQVPHSKAHYLLAASGVSPGHALRDLKALDPQASVATPLKEQDSFDPDNQKFLKNIQQRGRQVMINESLARTQRDFDSFLEEKVDMDWEEQRRKIFQHFGLAQKDDGAGDVRGGFGRSVRRSKQFGPASTSGPTSTGRRSVFGRSALEKSVIGTPGTGTASLRLFEDPMERNEGAGGHSDLRFLREKMGYYADKVRQLNSTRLHSRAFPILHEFSDVEGHAGGDVPRQLYDAYRALISIVGESPDATNMTDPSALVERQFAQDYLDESPNS…
g9.t1	OJJ76764.1	OJJ76764.1 hypothetical protein ASPBRDRAFT_113424 [Aspergillus brasiliensis CBS 101740]	Aspergillus brasiliensis CBS 101740	99.3	712	5	0	1	712	1	712	0	1449	MSAMTGTRSPTSPWPPECQNLQLEGSSTPSALFTLRDPQMSPLGHAINPHNPVSERSGPNYFSISVESPGNPRRSREAVSYAQPPVSSPKTQLLSKNKAFEDYVGLPKTGTLADDEHKESPVFRLSWNPSLQRRSPMPSRQDASPLRQTSTHGCGISTERCAELLESSFRDIMLLDVRPYAHFAKGTIKGSLNLCIPTTLLKRPSFDTQKLTNTFTNESDKESFAGWRSCRYIIVFDTATSDMKDAGPLMNVIKKFTAEGWKGEGLILLGGFKAFSSRFPTFIQGQQVPVSDSPAGRPSRMHIDLPSVAPVAGGCALPESSHAAIPFFGNIRQHMDLIGGVGQIPLQIPPSFSEHKKRLLPPWLREVSESTDKGRKVSEKFLSLEKKELERMKKALSYE…
g10.t1	OJJ76765.1	OJJ76765.1 hypothetical protein ASPBRDRAFT_190114 [Aspergillus brasiliensis CBS 101740]	Aspergillus brasiliensis CBS 101740	91	558	9	2	1	517	1	558	0	1012	MILNLPPELIQLVLQNCSTPDFLEAAFSCRTVYEIASTCREVLLHHLRRTPGNISRDLRSFSSKQLFRLLTKNAFQQLYGAQHHAIHVIFNFENDVLDVKASTFASFDHQTLALVARGREKVHLFHIEHGQLRPLSEVDLPYHQSGIAEVLKTAFDGDGGLYVLHRVVPAMDATDTNANHPFIKQAMQSNINGMHYLSRHFLDSPGEPVRVCAFPDHANYTPLALAAMPGGNFAISWQHNYDFSENEVVLYTASIDSHSTANSGIIGISYDSCVLLERTRQRLEGDSTPQSRYTQDRLLLGKGPVVGLAFNDRSSQLLYRYRAEALYGSFQKIDLLPFPTRSVFIGIPFSGTHETRVHNGLPSCHWKYLSFGIATHREEDWTVACLLRSEAVCRASNCE…
g11.t1	OJJ76766.1	OJJ76766.1 hypothetical protein ASPBRDRAFT_190115 [Aspergillus brasiliensis CBS 101740]	Aspergillus brasiliensis CBS 101740	99.5	187	1	0	1	187	1	187	7.70e-119	345	MRSSYFTLLPALSLSSLSTATSSSSLPLSAEILCWPVSAPEPSVLAHVSYDSTTLQPELTSSSTNIVAACYGHEPQDASNDLIRLGVYTSTPTNSKQWVGTLASRSSLSGSENDRPTLRLHIGPSNEIYYVDLLSSASSTTSSTPVSPQLELLSSQAGPRPHLNQPIVLGPDGKNAEEVVEKTIFQK
g12.t1	OJJ76767.1	OJJ76767.1 hypothetical protein ASPBRDRAFT_190116 [Aspergillus brasiliensis CBS 101740]	Aspergillus brasiliensis CBS 101740	99.3	606	4	0	1	606	7	612	0	1206	MPYRRPSRQGSRQASIDTRDEIQVRVDHYIGIDVGTGSARACIIDSKGDIVGLASENIGLWQPQQGYYEQSTNDIWRCICVAVQRAVSQHNIDPETVRGIGFDATCSLSVFSNVTDEPISVTGPNFDSDRNVILWLDHRPVKETEKINATNHNLLRYVGGKMSIEMEIPKVLWLKNNMPKELFDQCKFFDLADALTYIATGAEKRSFCSVVCKQGYVPVGVDGSVKGWQEDFLKEIGLEDLSEDNFKRMGGVDGVNGDYLSAGELVGTLCDKAASELGLPPGIAIGSGVIDAYAGWIGTVGAKVDLESEQLSSDVAKNDKTQAFSRLAAVAGTSTCHLAMSPGPVFVPGVWGPYRDTIQPGYWMAEGGQSATGELLKHVIETHPAFNQALSIAESYNAN…
g13.t1	GCB19539.1	GCB19539.1 low affinity vacuolar monovalent cation/H(+) antiporter [Aspergillus awamori]	Aspergillus awamori	95.3	1139	45	3	1	1139	1	1130	0	2046	MSNNDEREDQGPSHPIDSIESSNVDNEEMSSGARRQQRNATQSRRNYGTLDSPARMDLDPRLEDSQPESSSRMPTSQSTSTPPLQSDRPRKPSVTRRMSSKRQVPHKGQEFSTEDDVQEVEEDIALQHASNPQSSPRIRPLRKQSSTLRRRVNARMNSPLIQPDTENEGEEGVGLPDPGTELEPSAEHSESGSPDSNDNHDEDEAETSDAESFTLKDRQQAINETHPFGIRLWKPALYKKSRSVEKTAEGDIHSSPGGRVGNLLFLTNLLWTVFFGWWLALAALTGAVACFFFAYSPSALEYGKVFSGLSWYLIYPFGSFVRLDTDENYAEEDEGEGRSISEYEQWQNGDLEHGRLFFGPRRNRSLVGRRRNSVDSASEQDSLLGRTQRGSPRESPLSH…
g14.t1	XP_001400647.1	XP_001400647.1 26S protease subunit rpt4 [Aspergillus niger CBS 513.88]	Aspergillus niger;Aspergillus tubingensis;Aspergillus awamori;Aspergillus alliaceus;Aspergillus niger ATCC 1015;Aspergillus niger CBS 513.88;Aspergillus carbonarius ITEM 5010;Aspergillus aculeatus ATCC 16872;Aspergillus brasiliensis CBS 101740;Aspergillus tubingensis CBS 134.48;Aspergillus luchuensis IFO 4308;Aspergillus luchuensis;Aspergillus luchuensis CBS 106.47;Aspergillus welwitschiae;Asperg…	100	389	0	0	1	389	1	389	9.86e-273	750	MALDNYYRNKIESMKLEIIQGQAVLRRLEAQRNDYNSRVRLLREELGLLQQPGSYVGEVVKVMSTKKVLVKVHPEGKYVVDIADGVDISKLTVGKRVALLSDSYKLEKMLPSSVDPLVSLMMVEKVPDSTYDMIGGLDQQIKEIKEVIELGLKHPELFESLGIAQPKGVLLYGPPGTGKTLLARAVAHHTDCRFIRVSGSELVQKYIGEGSRMVRELFVMAREHAPSIIFMDEIDSIGSSRIDSAGSGDSEVQRTMLELLNQLDGFEPTKNIKIIMATNRLDILDPALLRPGRIDRKIEFPPPSVEARADILRIHSRSMNLTRGINLTKIAEKMNGCSGAELKGVCTEAGMYALRERRVHVTQEDFDLATAKILNKHDDKEVAVSKLFK
g15.t1	OJJ76770.1	OJJ76770.1 hypothetical protein ASPBRDRAFT_113475 [Aspergillus brasiliensis CBS 101740]	Aspergillus brasiliensis CBS 101740	99.4	520	3	0	1	520	23	542	0	1036	MPVILQSTIDLLETELAKARAALHEIQPTTSSLFTKRDELALGAVAAYRQNLIDRAPDFFYGASRLTPKELGLVPTVREVQADDDDDDYVKTVSKQHLQPVQPVAPKRASLADVLSNSLILDHLAPYLSTPSLLALASTSRQVRSLIVDTPYIFRHLDLTQCRGAKPASTSTIDSVEQISRADQGEDSAAEDEVYSAPLRGIFASLQRQSLLQDVRTLVLDGLSVPAGLVAEIILTDRFNINILSIRECRHLNERKLMQVLTHAVRPSRPKGTPRVKGIYHFTPLHQSRAMARSRYRDWWGSRCGSQASCTTPTSENGTAADEHAERATQQQDAWYRPSGQLFKRSIEDGWAETIKQCEGIIAFDAVLCRGPRHDVELPTPMPDGQGVTQPEGRPPLEP…
g16.t1	OJJ76771.1	OJJ76771.1 hypothetical protein ASPBRDRAFT_112963 [Aspergillus brasiliensis CBS 101740]	Aspergillus brasiliensis CBS 101740	96.1	775	11	1	1	775	1	756	0	1496	MAGNQGSLRWSSQLTVASAQQISKLPGDKIILPPSALEQLLAAAPLQEVTSSGPARPYTSTFDPFNPHTFAAESQARERAVDRQQQLPHPLTFRIVNPQNDRVVYAGVREFSAPENEIGLSAFLRGALGIDGTRPPSPRRDEDNDGAVADGASAAPTTVTVHAEQLPKGTYVRLRPLEAGYDPGNWKALLERQLRDNYTTLTSGEVLTVAGGRDQSFHFLVDKVEPHGNGICVVDTDLEVDIVALTEDQARETLEKRLQKSSRISGTRAGTSVGGELRLGQVVTGQVALGDYVDYELLKWDPTDALELSVEGADDADLCLFASPLSARQRNRPREDEHVFSDLSNRPTKRIRIQPTNVDMEDAEMLYISVHASTSTDSSDTGDSALPYSLQVRVGSSPG…
g17.t1	OJJ76772.1	OJJ76772.1 hypothetical protein ASPBRDRAFT_115032 [Aspergillus brasiliensis CBS 101740]	Aspergillus brasiliensis CBS 101740	100	317	0	0	1	317	518	834	1.70e-204	591	MAQYYPQQQPYGVQSSAQNLQFYPSSYTSVSGHTTPSQASYGGLGGAPNPASQAYPVGGVGGGYGGFGSPSAGVSGRMGEQGGLRTGWLAAFGTEGYDGEPPLLEELGVNFEHIRTKTLTVLNPFARIDQHLMDDSDLYGALLYIVLYGTFLLLSGKVFYGYIYGVAVFGTVALHLILSLMSPALDTVPVPNAADPTNYSPHHKPTMSDASAAGHFSATLTFPRSASVLGYCFLPLVLTSLVGILIPMDTMFGYLLTTAAVGWCTYSSSGMFCAVARMRGMRGLVAYPLALFYVVFGIMGIFSSRGSGTLAAKTGAA
g18.t1	OJJ76772.1	OJJ76772.1 hypothetical protein ASPBRDRAFT_115032 [Aspergillus brasiliensis CBS 101740]	Aspergillus brasiliensis CBS 101740	99.8	514	1	0	1	514	1	514	0	1011	MSSPLSADDEDIFARLQQRADPKVLDEQQQAVDERVRAIYQKAQTRLGELLDQNSTLPCTISSVEVHGARNTRRAFLERIFNPLLSSNQDRPYTLSEALREVSARADKLNRFDIFQQPVSVYLDQSEVDGSGIPSIKVHLSGKERSRVLLKTGTDLGNAEGSAYGNLLWRNVFGGAENLNLNASLGTRTRSAYQATFDTPVLSNPDLRLELGGVASATQKSWASHEEVLRGGWSKFRWASPSGQQHEFGYNGFWRQMTGLAENASPTVRADAGDSVKSSVFHSWTKDQRDSPLLPSRGYYAKVFNELAGWGPLKGDVSFWKSEIETQAAVPIPIPGIKGDSGISLTTGFRAGLLYPLGLDSDSRPQLSRTNDRFLLGGPTDVRGFRLCGLGPHDGADAV…
g19.t1	XP_001400652.1	XP_001400652.1 ubiquitin-conjugating enzyme E2 6 [Aspergillus niger CBS 513.88]	Aspergillus niger;Aspergillus tubingensis;Aspergillus awamori;Aspergillus niger CBS 513.88;Aspergillus tubingensis CBS 134.48;Aspergillus niger CBS 101883	100	275	0	0	1	275	1	275	3.01e-205	570	MATKAAFKRLTREYQNIQKNPPPYIVAHPSESNILEWHYILTGPPGTPYENGQYWGTLMFPPEYPFAPPAIRMHTPSGRFQPSTRLCLSISDFHPKSFNPAWEVSTILIGLLSFMTSEEMTTGSVSASEAERRVLAARSRWWNSTGGGSHVSATPGVTPTAKGINNVKAGDGGLKFRSEWPELDQENWRWMKDSRIDTNTGQLMPDPSATRCSPETSALRRRPNGSAPGLGAVMEGGHVAREAGQSWVRRNKIWLGFAILFGYALLTRLVKDVQG
g20.t1	XP_035351598.1	XP_035351598.1 cytochrome C1 heme lyase [Aspergillus tubingensis]	Aspergillus tubingensis	97.3	332	9	0	1	332	1	332	7.81e-226	627	MGWFWADSQAKPAPAAPHPVPSSDASPPPGCPMHASNTTPAMPAPSPTSEPPSACPVRSTDSPFYVPPKSKSPESQPPSNPTPSSDSRSTLSKLNPLNYMFASISQERAPNQTVDLPVEREVSSIPRSDMNENWEYPSPQQMYNAMLRKGHTDTPQDAVEAMVAVHNFLNEGAWAEIVRWERIFSKGLSDGWEKCRRGEENIIMDELKEEMSRAPKQDIPTPRLIRFQGRPQDLTPKARILQALGWVYPAKFESNPPFDRHDWFVMRQTPSGPKEVRYVIDYYSGPPEPTGEPVFYLDIRPALDTPTAAVERLMRWGGDVWWRASGASVRENNGN
g21.t1	XP_025566339.1	XP_025566339.1 ubiquinone biosynthesis protein [Aspergillus vadensis CBS 113365]	Aspergillus vadensis CBS 113365	89.6	1314	87	2	1	1291	14	1301	0	2283	MQVNDQQSDLTPRTAGSVHKVQCPSLNQVLSELASLPPASTLAATKPLPSEEQKNLFESLQKCLKTAENADISDALQDTPVILQKLWKCRSPYLVPAAEAMANGSRAPLWRVSYGKIGVLDFFLQLIASKETIDNRVILHALRLVGNSCADTNENRETVVKHNYTAAILQHSSNPELIQVVIPVLYNICIDFGPAQTQLAADKIVYILLKLVKDEQGIASSPDGTISLLVELALNEDVASTPARFSALVSGLAPYLNNTHFQEICISSYIVPDILAVLSRSLTFKAESSSEDTQALAQSRLKVNQILAEISGSTSFARYYPLDSPLARSLKIWLTSTEDQLQICSCVILGNLARSDATCERMVQDLRIHEELISILKSDVRGAVLHSALGFLKNLAIAG…
g22.t1	OJJ76775.1	OJJ76775.1 hypothetical protein ASPBRDRAFT_165140 [Aspergillus brasiliensis CBS 101740]	Aspergillus brasiliensis CBS 101740	98.9	92	1	0	1	92	1	92	4.80e-54	173	MTRAQQTLSVLLLVSSLYLVLYLGLIPLNETVQTEIIPVLPFYALICFGCYLLGRLGLAILTFNDVPEAHEELQKEIEQAKTELRRANIDVD
g23.t1	GCB19530.1	GCB19530.1 xanthine phosphoribosyltransferase 1 [Aspergillus awamori]	Aspergillus awamori	97.5	671	17	0	1	671	1	671	0	1305	MTPDRLFPRHLRSPGDDGYRTPTIEDTQNDLSEHTGGDSYFHPRGSIICQAHTSALDAIHSSSYRKSEGDGDEGVDGMAYPQDEAETRPTGLGWKKRIRHITWAFFTLTMATGGIANVLYFVPYRFRGLETIGIIFFLFNLFLYLLIWCLLIARFYLYPYTFKASFLHPTESLFVPASLVSFGTILINISQYGPDRTGPWLTYAVGILFWIDAALAVISSAAIYLILWSTQTFTIAQMTPIWIFPAYPMLIIGPHAGILSSKLEPSRSLRIIIGGTTIQGVGFLVSLMVYSAFIYRLMSQKLPRENVRPGMFVSVGPSAFTVSGIVNMAAHAKRSFPEDFMGNGALAADIVKVVANFSCLWLWGLAIFFFFIASFAHWSAIGPGRMVFSMAWFSFVFPN…
g24.t1	OJJ76778.1	OJJ76778.1 hypothetical protein ASPBRDRAFT_35937 [Aspergillus brasiliensis CBS 101740]	Aspergillus brasiliensis CBS 101740	99.3	297	2	0	1	297	1	297	6.86e-213	591	MGGTEDGRKSVLITGCSPGGIGNSLAREFHRNGLRVFATARDAKTIEDLASIGVETLSLTVDDEKSVRQCFEDVKGKLGEKGLDYLVNNAGRNYTVPAMEAELSEIRDTFETNFVAVVHICQAFLPLLMKAKGTIVQIGSVAGVIPYVFGSVYNASKAAIHSFSDTLRVELAPFGVHVTTIVTGGVQSRIARIKRTLVPGSLYAPIEDEYNRRVVHSQAGAMSNEAYARSVVTQVLYGSAPWRWIWPWAQGRKSWIWEGNKSWLVWLLMGGWAWNGLSGKIVTRMFKINRLRRAAGK
g25.t1	OJJ76779.1	OJJ76779.1 hypothetical protein ASPBRDRAFT_165149 [Aspergillus brasiliensis CBS 101740]	Aspergillus brasiliensis CBS 101740	100	443	0	0	1	443	1	443	2.40e-305	837	MFKLARSKPVTAALRAATESSVKSRVAQQQRNLSIHEYLSANLLKSYGIGMPKGEVARSAEEAEAVAKSLGNDDMVIKAQVLAGGRGKGTFDNGLKGGVRVIYSPTEAKMFAGQMIGQKLITKQTGAAGRLCNSVYICERKFARREFYLAVLMDRASQSPVIVASSQGGMDIEAVAKENPEAIITTPIDIKVGVTDAIAQKIVTELGFSEQCVEEAKDTIQKLYKVFMEKDATQIEINPLSETSDHKVMAMDAKLGFDDNAEFRQKDVFSWRDTTQEDADEVKAAEHGLNFIKLDGDIGCLVNGAGLAMATMDIIKLNGGSPANFLDVGGGATPAAIKSAFELITSDPKVTAIFVNIFGGIVRCDAIAQGLINVVQEMGLRTPIVARLQGTNMEQAHKL…
g26.t1	OJJ76780.1	OJJ76780.1 hypothetical protein ASPBRDRAFT_35942 [Aspergillus brasiliensis CBS 101740]	Aspergillus brasiliensis CBS 101740	99	508	5	0	1	508	1	508	0	978	MAADAAPIQQIITLFAHLNTNAARHDAYHRILDLLNPHEWRDVQRRINQRSFQKDILAESPPEIAVQIAQYLDLSDLHILQRVSRKWHQLLSSELIQGAVYQQYTGHVGAAAHFAQYAKYRIRLERGQPICNLQDPNLFPTNGSKLECLDYANGRCAWIENGTHVVVHNLCTHSNQRFCTENRDSFWDLRLSDSMVVAISARAYCHTWNLETEEHASFRLPGFSFRTFVASGLKLALSFINRSAAGDEESMIYYWDMSSRGVRTIEVTSHLALISLHPTTNSVITLLLERGDDPMNPDHSSWDRLRVVKHTFDDHGRITSPLSSYISYLPFPIELDWSTIANMSDSSTSSLAVFSCKPPPQSNTLSSPPPPPPPTRTTTTLHYVLVVSYDPQRDRVYVH…
g27.t1	OJJ76782.1	OJJ76782.1 hypothetical protein ASPBRDRAFT_24501 [Aspergillus brasiliensis CBS 101740]	Aspergillus brasiliensis CBS 101740	96.8	597	0	1	1	578	1	597	0	1126	MSGLADPPSRSPLILTAIDAPGKTRKIPVLASSVPPSSQSTGDPMEVTPPASGAAPPIHSSPDSDRAGASNTTAATSNGSTEPSNVNHHAAPTQAIGAAAAAQQPKVVQTAFIHKLYNMLEDPSIQHLISWSSTNDSFVMSPTSEFSKVLAQYFKHTNISSFVRQLNMYGFHKVSDVFHTGSPDSALWEFKHGNGNFKRGDLVGLREIKRRASRHALIHRDSFPGHKAAASQPGTPAEPVPDVTESRLMNLEHSMYDLHARLRNAEEGNATLNARCQSMAESLTRCYHWTHSISRFLQGMIPDRESLLYRDVASMQAELEKHLEAVRALEHPPDPYLAVRQPYVTGLSGDAGPPLSPRQMPPEDSRRPSMLDPSRANMIRPPVPPHLAVSPRRYGSIGA…
g28.t1	OJJ76783.1	OJJ76783.1 hypothetical protein ASPBRDRAFT_24502 [Aspergillus brasiliensis CBS 101740]	Aspergillus brasiliensis CBS 101740	99.1	228	2	0	1	228	1	228	7.92e-116	340	MSTSKSETDIILNKANVALARSQRLVASWLPAPTADDQAHSTKTEEELQREEDEIFTAVPETLGVGAPLPTKAADGSWNRTELDSNDKLRKQLLGRNYQKVMAAKKASAAKGGSNDASAAASTNPAKNVEEEDSDEEEGRTAVIGKRRAMPAKKRKAAEPQVQLESETVGGEPGESKQANDIGDGKEDRADQSDKQPGASSRPARGRKKGTSFLDEILAERSKKRKKR
g29.t1	OJJ76784.1	OJJ76784.1 hypothetical protein ASPBRDRAFT_35945 [Aspergillus brasiliensis CBS 101740]	Aspergillus brasiliensis CBS 101740	98.4	257	4	0	1	257	1	257	5.53e-183	512	MDVPCLAIRSPLLRRCHVCLSGSRISDASRLTRPRAVTPFIRRSSTRRYATIQDTQAGNSVNDSESRQAHPLSGYYHDILSTRSPYRHHATTNPKTEEPKPEAQTPQEKMAIVFGTRLAGPGRSSRYDPGSAPDTTWKTINGVAIPPRPEEPDNCCMSGCVHCVWDDFRDELEDWAFRLEQAKAKGATKTDASDMRHTPRAEVNSASMSMDDDGGGSETNWSVPSSGDDLFASIPVGIREFMKTEKKLKQRHQQESA
g30.t1	OJJ76785.1	OJJ76785.1 hypothetical protein ASPBRDRAFT_35946 [Aspergillus brasiliensis CBS 101740]	Aspergillus brasiliensis CBS 101740	97.9	617	13	0	1	617	1	617	0	1108	MNDPAPQDDSQQRTVQRMSYQAPTRASLARSHPTLLDTENNKSPAKSMQKPNQARTRALGLRDRKALRPSLTSTASPLGSLKGSKQSPASSLSGRRSSGLAAFAAPPRRVSTRITASDLVFRSPSASQQSTEKLPPPTDTPENQLASELDSATGDIDANEALQQPSFQDILDEPDLPPTPTQLGLERPPGRPKGLLSSSPSSQPGKWGRRRNTDGREQSPSKLRKVDYGEAGESAESGLLLDRTSLPEEILTKRKMKNKLASELQQLKKEISELEMWSKDLAQDDASDERDLTGLITLLAAANPPQSTPTAPGETSISSLISSLLPFATKGPPKATPKAPPVNPFALGENAQTEAYLTALAPLQLTAYSETVPNSTPDLVLERHTLKFSAPSPFPSNRY…
g31.t1	OJJ76786.1	OJJ76786.1 hypothetical protein ASPBRDRAFT_49821 [Aspergillus brasiliensis CBS 101740]	Aspergillus brasiliensis CBS 101740	100	225	0	0	1	225	1	225	5.39e-140	401	MAIKHNNQILNQHFHKDWQRRVRVHFDQPGRKHRRREARLAKAAAVAPRPVDQLRPVVRCPTVKYNRRVRAGRGFTLAELKEAGIPKKLARTVGIAVDHRRVNYSKESLVANVARLQDYKARLILFPRKSGQFKKLDSSAEEVNAAKAAFAEGKTEGFTSRVGGVLPIKNATLEEAVTEVKRDDLPKGEEAAYRRLREARSEARYKGIREKRAKAKAEEETAAKK
g32.t1	OJJ76787.1	OJJ76787.1 hypothetical protein ASPBRDRAFT_60484 [Aspergillus brasiliensis CBS 101740]	Aspergillus brasiliensis CBS 101740	99.6	479	2	0	1	479	158	636	0	891	MSQDPDSHLSQGSLAPPAEITGPATPMQRASQSASPDLSVGAGIPVSHSDHSKSVSPSLPSSDMTPPPSSQIPGAPRQRSRSTSSSLLASPPDIQKTLCVAYGASENLPTVDDIDTADESKLRVMAKDLLSVAQEARMSALHFKLQNSLLSFTSNEAIKRAEVEHQLARREVEIIQSSEYRSRHCQPEVKAVQQISNVELELALKRNQELGRVNATLDRRLRRAKRLIEQEKERSDLLEEENKLLKERIRDNRKHFSQMIEHGPMSPSPQREIHASHRRPLPHYVEHDGHQMNGSDSHDPFAQLLAADRVLNRGSPSVTSTPHRNRAYKQHSDGQMRGNPPISSFPITPSRARMAHEGNQYSTPGVESQDSHRDRDSTISASDIEEAETEEDIPASEAG…
g33.t1	OJJ76788.1	OJJ76788.1 hypothetical protein ASPBRDRAFT_49823 [Aspergillus brasiliensis CBS 101740]	Aspergillus brasiliensis CBS 101740	99	995	9	1	1	995	1	994	0	1732	MDNPQKTPNRPSGIPRLASRLPLPTSAASKSLRPSPSREKLQTDSGLHASRLSRPSQEPVFKKPLPKYAVPKKPVGTQRQERDISRTRTSDTGVTESEGSLNNKSLYLEADTVPAHDTEFRGRTRPSLSERTIETLSQLPQSPRPQSRQSSSFFGATSPMRSPSRPPSGMTSYSRSPSRSSSRQPSGSDYLSRPPSSMRLPSRSGPSFSANSAASDQSFIPNTDSPSKLKPPSTRITPYDRKNDVTSASNPRHAPTRVSTRPAEPTVDAPQQRLEVKKTRKVQQGLSGQRPSLMGSRSPSAKSTSSDLTPEQQTEMETRKVSKSSSALRESIAKAKAARKAEAQKSSKPATASGGFDFDTDDPFNQGPKDPNHGLLRKRIDAGRTSGHLNIAAMSLKEL…
g34.t1	OJJ76789.1	OJJ76789.1 hypothetical protein ASPBRDRAFT_49824 [Aspergillus brasiliensis CBS 101740]	Aspergillus brasiliensis CBS 101740	98.6	367	5	0	1	367	1	367	2.28e-228	636	MSKKLQSTLTTSLTLLDQFQGAIASPSSDISSSTDLSAKDALPLLSAASTTLKSQVTKLSLLTITSPFTPSAVTSVINALNESVLPSLVAAALLVTPAHHTKAFQSEVHVLTQTALNETTALLKEVQAVANKAEDAQKKETGLSQTEKDVVTVAAGRLWDSCDALIDLAAKGVVGFVVRRVEEWRDLVRDAVQEIEEWDPDEEGDDFFDDLLSDDGKGKADEDDEEDEDDDDEDTAALHEQKKSALRILKPVAQIYPTITANRLKKTSDSPAIVGKLEALMKYLQQIPGHVDEVAGALYEANTEKSLQYMRKTKDCAVKAVNLSSLPLDVSDPADAPQEKEDKFTTWATTWLKVMDQVSKSVIDATQ
g35.t1	OJJ76790.1	OJJ76790.1 hypothetical protein ASPBRDRAFT_35954 [Aspergillus brasiliensis CBS 101740]	Aspergillus brasiliensis CBS 101740	99.1	468	4	0	1	468	1	468	0	942	MGTTKPRPSGRASVAKVQPLPDKTFVIDNGAYTLKAGYAPDSAPPDDQSKALSACSEIPNAIVKTRGNKIYVGSQLNTHVTDWNELMFRRPVEKGYIVNWEAQKEIWEHSFFDEKTVRSKDLRITDPEDTTLLLTEAPNALPALQKNADEIVMEEWGFGGYLRCIGPSLNAWNDVQSLFGDPIVQEANTTVSPKECLLVVDSGYSHTTVTPIYKGQPLQRAIRRLDLGGKHLTNYLKEMVSVRQYNMVDETYIMNEVKEAVCFVSNNFVGDMEQTWKGNRKRGLPDASEGVMVDYVLPDPNAGKKGFMRPHDALLNAKKRKGALSGASAEALSEDALVLGNERFAVPEILFTPSDIGMKQAGIPDIIMQSLSVLPTGLHPAFLANVLVVGGNALLPGFV…
g36.t1	OJJ76791.1	OJJ76791.1 hypothetical protein ASPBRDRAFT_49826 [Aspergillus brasiliensis CBS 101740]	Aspergillus brasiliensis CBS 101740	99.7	356	1	0	1	356	1	356	1.66e-261	719	MTAFNVKDLASRAAQRIAEHRQKTEARGSTFSTEPLPIDRVSSVDAASLRTMSHSEEEHRHKSKMSRLVQKVRGRFSKRLAKREVIDEPCACCLDIMPAECLISMPCQHKYCSRCLKKLVFTVMPEEGLFPPRCCKQKIPTEVILPVLTPKERTVYFAKVQEYATPARERWYCPAPTCGRFIPPKHLNSKLSSQSCPYCSTTFCSGCRCPEYDNSTSTGKKDPGFMAVFEDPRLGKAQRGLKCGSLVDLLFNCDHVTCRCKAQVCNLCRNPWLSCTCAKPGQRPIDFLTFIIGHSGVNKDQEAELAAVVAAILCNERLRDEELAKTQGMKEKGGTANRSRASLLIPQQVTRARRVS
g37.t1	XP_001400672.1	XP_001400672.1 3-hydroxybutyryl-CoA dehydrogenase [Aspergillus niger CBS 513.88]	Aspergillus niger;Aspergillus awamori;Aspergillus niger CBS 513.88;Aspergillus phoenicis ATCC 13157;Aspergillus niger ATCC 13496;Aspergillus niger CBS 101883	96.9	319	10	0	1	319	1	319	1.72e-208	582	MLSSSLRTLGRRGPSMASRAFSTSPAVHAAEVKSLGVIGAGQMGLGIALVAAQKAQVPVTLIDNSQASIDKGLKFADKLLDKDVAKERITRDAADAARARITPSVKMDDLSTVDFVIEAVPEIPDLKTSIFSQLAQIAPKHAILATNTSSISITKIAAATTTDPTDLQAPSRVISTHFMNPVPVQKGVEIIAGLQTSQATKDTAIAFVQRMGKVASVSADSPGFLANRILMPYINEAIICLETGVGGREDIDNIMKTGTNVPMGPLVLADFIGLDTCLAIMNVLHQETGDSKYRPSGLLKRMVDAGWLGKKSGKGFYDY
g38.t1	OJJ76793.1	OJJ76793.1 hypothetical protein ASPBRDRAFT_60490 [Aspergillus brasiliensis CBS 101740]	Aspergillus brasiliensis CBS 101740	98.5	1169	18	0	1	1169	1	1169	0	2183	MENEEPVLSAPDVQVVDPDVRAHVYSLVTALGGFNGEDADKYVLGDDALACLRDIKRWLKLYDEKHNRMDVARCLGEANLVNGDLLPILVVWANSKKQTKYMSRIALACLELLVPLTWPVELHGELTINHHRHIPYIQHVHVSYKRGLLSHASTSYLRTIISVGIPSMAIPRSERTTRDEGILKLLLYLLRNIALITPNTRLAAEGDEEETSRSATINAFQDQDVFALLLTMCSNVGDDFTMQDVALLEILFHLIRGVNVEKLFMDDAQRTAKRTDELDDLLRQESSLRREYAKNAPTRHGRFGTMMWVKRDDAKYSTVSGQNVLKDSQATLQKMDETKKWNRPLIRRKPQDLTVHNDFSTPVHLTSTASNNLRMFVEEFLDSGFNPLLTHVRKAIERE…
g39.t1	OJJ76794.1	OJJ76794.1 hypothetical protein ASPBRDRAFT_215090 [Aspergillus brasiliensis CBS 101740]	Aspergillus brasiliensis CBS 101740	96.9	423	13	0	1	423	1	423	2.30e-259	719	MPERVTRKSLLASPLQVLKCAFRGRRSRSGNMNTQASHSNRNQDSLSKSTFARTTCLHPPNTPKTPKSTTEASSSASTPTKNLRSVRGERIKRAVMLPPDTEDMETFSAQAEEEGQGKLEEDDEEWISVSHKENESQSLTLHDISLPVPQLNMGEKALHANYSRLPTPVKPPTSNLYSHEMYQLEGRRSVLSSLGGAYTAGKRYEGADPKSGPSEDVHGVCSRSDSIHDGSTKTSEQRKSGLPLPQRGHSSERVQLRRTNVLPASTRGHGSSKPENTHKSLPVVVTGRPSNRVLSRKEVSHNRVEKQANPSSSLSSDPMSTDAADAPRFRSGEHQTEDQRPSQTMHIEDSAGLGLQMQSLHHRSDTTSTAEAQLSGSNLRVLPRRVRLTNKFENLRAQN…
g40.t1	OJJ76795.1	OJJ76795.1 hypothetical protein ASPBRDRAFT_60492 [Aspergillus brasiliensis CBS 101740]	Aspergillus brasiliensis CBS 101740	96.6	477	16	0	1	477	1	477	0	946	MLSEHQAASGILSCPVEVLDLIFEPLSFSELRELNLVNKGLRAQVEPILYANIQWLWREATSPPPITQLLRTISCRPHLATYITNVQLDGMRIRARKTAGPLPKIPVPSPELTEHIAFVQGTGVPYSDLWIRELHQGTIDAFLALLIAQLSNLRCLFLGPIFTEESQFVGKVLNSALCRPLDYRLPTFQNLRDVSFHRVVGDDGPQPKPTPRDRAKNNTNVLPLFYLPNVQRMSIAVGNPDAFTWPAAHLPDPSKLTSLDLTAVREPYLGDLLSVTPNLKTLRWAWYYDNGVEDDFVLPIVDLNRIAAALCQVRGTLTDLTILAEAPIGGNEQCYPAVKIEGSLCAMVDFYELKRLQVPLAFLVGFVKDTTKRLQDVVPRNIEYLTITDELGLQNDDGD…
g41.t1	XP_025480443.1	XP_025480443.1 TFIIH and nucleotide excision repair factor 3 complexes subunit [Aspergillus neoniger CBS 115656]	Aspergillus niger;Aspergillus tubingensis;Aspergillus brasiliensis CBS 101740;Aspergillus tubingensis CBS 134.48;Aspergillus luchuensis IFO 4308;Aspergillus luchuensis;Aspergillus luchuensis CBS 106.47;Aspergillus neoniger CBS 115656;Aspergillus vadensis CBS 113365;Aspergillus piperis CBS 112811;Aspergillus costaricaensis CBS 115574	100	478	0	0	1	478	1	478	0	920	MAAAPSSRPFEYLESLAGTVFYKLYQQPSTALAIFRRMLPDLAKCFVMALLYLKDPLPAADLEAWVKSESLKERDNALSILGRLHILSNTVTADNVRAYKVTDPFATSLRHALTGADQTQSFGVLSHVPAGSEVSISDLDEYARRQWEGVLGYMVGTGGMGAPQVTLSKGVKELLQAGHLVEIRDRRVEITQDGFAFVLQDVSTQVWHILILYVESASAIKMDSVEVLSFVFLLSSLELGKSYEKNHLSSKQLRMLTDLADFGIVYQESPDAPRFYPTRLATTLTSDSSALSNPLLGSLSGPAGEASSKAGTGFIIIETNYRVYAYTSSPLQISLIALFTTLKYRFPNLITGKITRQSVRRAVEMGITADQIISYLSTHAHPQMRKHNVSRSTSNQAGI…
g42.t1	TPR07101.1	TPR07101.1 Carboxylesterase family protein [Aspergillus niger]	Aspergillus niger	98.5	137	2	0	12	148	24	160	3.17e-88	264	MLRNTILTNGFLSRQLRVTAAKPGLVNFELDIKKEHTNRLNILHGGTIASMVDLGGSLAVASRGLFATGVSTDLNVTYLSSGGKVGDKILAEVSCDKFGKTLAYTSIKFANTKGEVFARGSHTKFVALAWKDPQNIVEEINKIESSSS
g43.t1	OJJ76798.1	OJJ76798.1 hypothetical protein ASPBRDRAFT_49832 [Aspergillus brasiliensis CBS 101740]	Aspergillus brasiliensis CBS 101740	99.6	1420	5	0	1	1420	1	1420	0	2796	MGLQTRQAMAQGLDSRPTVEDFREDSAWVRLAKSHWLEGSKARKVKQDVLKKDLWDPLEAENFSFRSLLTLENLNIMEKFLWPTYTEDASNYHVLLLALIVSVKQREHLPIWDIFSDRPADFSNLFHRILSMSVDPSLGTSSRLSIVSFIISAFQSVENPLIRKECAPLVSISIWHNLSSEEARDRLLARSSGLKKAWRAAGKRYDAGDETNKAKMRFERSWLYTMLLDFFRRLNGPEREQADNMRYCERLLEFLVDLESQPPTRRYVNTLLKDLNFLSVIRLSQLYRSADSALFRDLCGLLEHFSSFAIDDFTGEALSPQVIYDAHCQELARLQRTSMKYFKDKLMILALSNYGSIEQRSELEGQLATLEESELRELCSHLGFRTDYPKQSQITPDRH…
g44.t1	OJJ76799.1	OJJ76799.1 hypothetical protein ASPBRDRAFT_190147 [Aspergillus brasiliensis CBS 101740]	Aspergillus brasiliensis CBS 101740	99.1	671	6	0	1	671	1	671	0	1217	MADLDVGAIHAYRKMIDDLLNRAERAKPDNHIEPPLTESQLGDSIWLIQGDDEPLAKGLSQQTQFAAVEIAFREKFYSLLASTSIDDPSFIRIWNLLDVISIFSDNEQCEPGLIFWLIEELLDSQTIDGCRKVFDYLESRRERNTKKHFKQKSLIILRSCNELLRRLSRAEDTVFCGRVFIFLFQSFPLGDKSAVNLRGEYHTDNVTTYDELTKAAAKDVADADVEMSDEQEAPTTTEGPKEETEAQTASASESHTPAQEPPETPRVVVSSSKDESQDKGVDLDDLYPIFWGLQAYFSAPTKTFDPQHFAKFKTGLEATISAFKNVDTDLENSSNSKMSEEIRKSNKRKRTTDGQEIASSFNPKYLTSRDLFDLEVNDTAFRRHVLVQALILLDFMLSL…
g45.t1	OJJ76800.1	OJJ76800.1 hypothetical protein ASPBRDRAFT_112584 [Aspergillus brasiliensis CBS 101740]	Aspergillus brasiliensis CBS 101740	99.4	513	3	0	1	513	67	579	0	992	MQPLVLKAENAFTAVAPSDTSSPVQNSTGPTSVDNRENRHTETKADTSRVKLEKHGHDELQLPRPQETASPRVTTQMTPEQKEREAAVQHEKEKDNGDADMCSSDDGAGSSIGGDKKQSSDPKSEKKKMKRFRLTHNQTRFLMSEFTRQAHPDAAHRERLSKEIPGLTPRQVQVWFQNRRAKLKRLTSNDRERILKSRALPDDFDTTQVLRTPFDHKTPAEAPVASPRTLLARNPASNSSKMLLTDGLPRLNDDDYVISPLSSASTTNGFSAAADRHFESYAQPGVMPSRGGPALSDLHRHNRTFPFPRSSSFSESSFNSGLNYPGRFSRPGVEPLSHPGMAYGRRPVDYALGRPANGMVVGYDHQRALEGSVSPTGPPDQSIHYNVDSHNQQIPNYHS…
g46.t1	XP_001400682.1	XP_001400682.1 copper resistance protein Crd2 [Aspergillus niger CBS 513.88]	Aspergillus niger;Aspergillus tubingensis;Aspergillus awamori;Aspergillus niger ATCC 1015;Aspergillus niger CBS 513.88;Aspergillus tubingensis CBS 134.48;Aspergillus luchuensis IFO 4308;Aspergillus luchuensis;Aspergillus luchuensis CBS 106.47;Aspergillus welwitschiae;Aspergillus phoenicis ATCC 13157;Aspergillus niger ATCC 13496;Aspergillus neoniger CBS 115656;Aspergillus piperis CBS 112811;Asperg…	99.1	110	1	0	1	110	1	110	1.01e-36	130	MVHPSSTCCKTSGDGSCVCAAQAKCSCGKQNALHCTCNKASTENTVSGARCSCRVRPAGECTCERAATENHPVTGAACPCGKRSSTSCTCEKASAIDAAVGLETDFTTRA
g47.t1	XP_026620693.1	XP_026620693.1 adaptin N terminal region-domain-containing protein [Aspergillus welwitschiae]	Aspergillus awamori;Aspergillus welwitschiae	99	937	9	0	1	937	1	937	0	1825	MSSMRGLVQFIADLRNARARELEEKRVNKELANIRQKFKGGSLNGYQKKKYVCKLLYVYIQGYDVDFGHLEAVNLISSNKYSEKQIGYLAVTLFLHEQHELLHLVVNSIRKDLLDHNELNNCLALHAVANVGGREMGEALSTDVHRLLISPTSKAFVKKKAALTLLRLYRKFPDIVQNAWAERIISLMDDPDMGVTLSVTSLVMALAQDKPDEYKGCYVKAAHRLKRIVVDNDIAPDYLYYRVPCPWIQVKLLRLLQYYPPSEDSHVREIIRESLQQIMNLAMDAPKNVQQNNAQNAVLFEAINLLIHLDTEHSLMMQISTRLGKYIQSRETNVRYLGLEAMTHFAARAETLDPIKKHQNIILGSLRDRDISVRRKGLDLVYSMCDTTNAGPIVNELLR…
g48.t1	OJJ76803.1	OJJ76803.1 hypothetical protein ASPBRDRAFT_112643 [Aspergillus brasiliensis CBS 101740]	Aspergillus brasiliensis CBS 101740	99.6	273	1	0	1	273	1	273	3.58e-187	524	MTTPIRPSTPTRTTTLLTNLATVTARINSATTTSSSPKTTPPRLVAVSKLKPASDILTLHTTTTNHQSHFGENYLQELQEKARLLPTTIKWHFIGGLQSNKCVTLARDTPALWAVESVDSTKKASLLDKGWGERSPAVRETNHEERLRVFVQVNTSGEENKSGVEPGDGAVELCRFIREKCPRLRLQGVMTIGAIARSKATTPENENEDFVCLRETRDRIVTELELQGEEAKLELSMGMSEDFEGAIALGSDEVRVGTTIFGDRPPKDQARVI
g49.t1	XP_026620162.1	XP_026620162.1 hypothetical protein BDQ94DRAFT_120125 [Aspergillus welwitschiae]	Aspergillus niger;Aspergillus awamori;Aspergillus welwitschiae;Aspergillus phoenicis ATCC 13157	91.9	123	4	1	1	117	1	123	3.20e-65	203	MCRQYFMVYEWCRCEEDAGQQLCSSRNNENNYCPETAIQLVHMHCFCYGHATHGFKSERKLRRQEKKQDRKRFSMLSFADKSDRSDRSDNSEPSEQSVPTPRKKRWSLFASLRSRTF
g50.t1	OJJ76805.1	OJJ76805.1 hypothetical protein ASPBRDRAFT_35974 [Aspergillus brasiliensis CBS 101740]	Aspergillus brasiliensis CBS 101740	98.4	1108	16	1	1	1108	1	1106	0	1928	MDPSKRHEPASFTADSSPPATDSPLSRDDAMSSTQRLSYPSLHAMPLPPSSPGLSSAALLSPSEPPARAVATQAHPTPRRIPSSSSLADERRKSSPSLKKRSSTASLRSNRGASTSPRPSLSRHSSSSFGTSPTSASAIHPNMAKKTHRTASAEHPASTAAAVAAESFRREVEWHQSAKLQSQTLVLVHDACYGHRFSRPRASRAALNSIVERPERIQASVLGISAAYVRLARRHAGGMFAPHPDLNPQHLPVPPFHIRKTARTLSLSSPAVTHVHGSKWMEDLKTMCDAAESRLALNGKELVRPRSAGKDSATTNNAPAFHEGDLYLCSESLSAFEGALGGVSEGVDAVMGPGPTKRAFVCIRPPGHHCSAGHPSGFCWINNVHVGISYAAMTHGLTH…
g51.t1	OJJ76806.1	OJJ76806.1 hypothetical protein ASPBRDRAFT_24524 [Aspergillus brasiliensis CBS 101740]	Aspergillus brasiliensis CBS 101740	97.2	320	1	4	1	313	1	319	5.98e-196	550	MSPIPTSTPSPSTSKQTEPDADLDAIGSHCSLPTCNQLDFLPFRCPNCKGTFCLEHRTETAHKCANARISSPSPSTTTSTSTSTSTSHQQQKPNIYTADQCAHVSCKTLINTLTDPGVRCDQCRKEYCLRHRLREGHDCRAVVNNNSRAGRGGAAAGAAGGGADTLKSMFAKMRSWGKQPTSTSSGSGGRKPPSRAVQVNTMKRTAKGDNNVPTDKRVYLHVVGTSETTNKPATDPPRGDFFFDERWKVGRVLDDAARRLQVENVNNRGGGEEEKLRVFHVEGGVFLEFGDSVGGKVKSGDTVVLLRGAGVIL
g52.t1	OJJ76807.1	OJJ76807.1 hypothetical protein ASPBRDRAFT_49840 [Aspergillus brasiliensis CBS 101740]	Aspergillus brasiliensis CBS 101740	98.8	342	4	0	13	354	280	621	8.42e-242	680	MSPSAETLPTPESSTPQSSTQSSTPQETTIPHDPTHEEHQYLNLIRRILNEGEHRPDRTGTGTRSIFAPPQMRFSLSKPTADPKEYTPILPLLTTKRVFLRAVLAELLWFISGTTSSLPLSEAGIKIWDGNGSREYLDKVGLSHREVGDLGPVYGFQWRHFGAEYIDAKTDYTGQGVDQLAEVVRKLKENPFDRRIIMSAWNPKDMKIMALPPCHMFAQFYVRFPDAKRDEQGVVRDEKDWGKGHLDCLLYQRSADMGLGVPFNIASYALLTHLLAHAVDMVPGTLVHTLGDAHVYLDHVDALKEQIEREPVAFPEVRIKREDRGSGVVDGWKEEEFEVVGYKPHKAIKMKMSV
g53.t1	XP_025390331.1	XP_025390331.1 queuine tRNA-ribosyltransferase [Aspergillus eucalypticola CBS 122712]	Aspergillus eucalypticola CBS 122712	97.8	414	9	0	1	414	1	414	6.54e-302	826	MSTATTATAARKPMPSALTFDLHAKCSTTKARASTLRLPHGDVPLPIFMPVATQASLKGLTYDQLRQTGCQLCLNNTYHLGLKPGQAVLDAVGGAHKLQGWDRNILTDSGGFQMVSLLKLATVTEEGVRFLSPHDGTPMLLTPEHSISLQNSIGSDIIMQLDDVIATTSPDHARIHEAMERSVRWLDRCIDAHKYPERQNLFCIIQGGLDLEMRKQCCEEMVARDTPGIAIGGLSGGEAKEDFCRVVDTCTGLLPEKKPRYVMGVGYPEDLIMGVALGADMFDCVWPTRTARFGNAVVPTGTLNLRHRSFAEDFRPVQEGCACSICTPKEQGGLGITRAYLHHLAAKETVGAHLLTMHNVHYLLSLMGSARQAIIEDRFPAFVRDFFAKLYGEKTNYPE…
g54.t1	OJJ76808.1	OJJ76808.1 hypothetical protein ASPBRDRAFT_190157 [Aspergillus brasiliensis CBS 101740]	Aspergillus brasiliensis CBS 101740	99.2	477	4	0	1	477	1	477	0	949	MSEGKDLDHAESVQDLEAAPQVTLESDSETELGSRERALVWKQDLRIVPLCASIYLLCYLDRSNIGNAKILNQDTGNDLLSETHMTSYQYTVALMVFLIAYALFEVPSNYLLKKLKPSRWIGFLMLAWGATTMGLGGSHNFSQVTGIRFLLGATEAGLFPGLVYYLTFWYRNSERSMRVALILASATLAGAFGGAIAYGVGHMNEVRGLSAWRWLFIIEGAPSCASAFLVWFFLPDYPETASWLSPEEKNLAISRLEDEGSHGAAKAMSWKEAKEILTDWRLYAHYIVYFGISTPFSSLSLFTPAIVSGLGYADLRAQLMTVPPWAAAYVVTTVVAWSADHFNSRGLHSALFAFIGAMGFLASAVLPADAYLHRYGCLVVAASGSFACIPPLLGWLSAN…
g55.t1	GAA87212.1	GAA87212.1 similar to An14g00600 [Aspergillus luchuensis IFO 4308]	Aspergillus luchuensis IFO 4308	95.3	364	13	2	1	364	1	360	2.94e-249	689	MGSHGASSYRNGSRTGASSSSTNSDVSERSKSTAPTIYSDRPTPIQRGGGGIDMDIYDEEDPKASVSTYASTIPSEDDPPETPRYEVIDRQLDAFSTDVVPSDPSTFGQLFPSSRRLLVRHDDATLDGNMNLRVDTMVPRRGGYQQDVTLFHLRMYDLFTRKCSFRRYCRDSGREVCHSERRPVTSGSDRHPVFRRSWGSVLASLRPGSSGHGSLPSHEHKRQDSGYRSAEDDEEYFEDKHPDHKGGGGGDRHFVLTDSTLLEFSNYAHVELRRRGAGLSKRYEFEYWSTRYQWRRECRKDGDLREVSYHLVNTRTSKTVAHIVPEILTPMEAAEEEKKGGWVPPSSMWISDPSVYEKMPDVAE
g56.t1	OJJ76810.1	OJJ76810.1 hypothetical protein ASPBRDRAFT_112744 [Aspergillus brasiliensis CBS 101740]	Aspergillus brasiliensis CBS 101740	99.5	383	2	0	141	523	1	383	4.26e-268	744	MRSFPRFTVVTSPPRVMRIDALSRETARLANQGATPSHDDSQKVPGYEPVQAGRARWESTGGSEAGILSAYRIVPTGLDRRTRPAVISSYLSAWLPFVPRLPRFLLRRPLSVLNRPRYPGFSVHKPTRYRRPSGPRCALAMAIHPNFPTEVNPRGSLSPQQARAISAWTEQAAASLESLTLSESAPIGDSNVAFSQSTPTRSDVRGTTVSLSIPLDDPVPTAGSNSAPKVKVLGQPTQETQVASVTFRRREPVRRDSLRRREALLKGKDGSRRRQRWENDRLLNNPWAEPPSSKDWDIQATHTRHDPMPYYLAPLWDNHYAHLDHRSSQQMETRTEKHRVPKELRQRLKHARAARGILQDIEEDIRQFIQRWNEKQLLLKQEGLADAPQSSDSESEDEI…
g57.t1	OJJ76811.1	OJJ76811.1 hypothetical protein ASPBRDRAFT_113467 [Aspergillus brasiliensis CBS 101740]	Aspergillus brasiliensis CBS 101740	100	391	0	0	1	391	1	391	7.69e-287	786	MKLSTALALGATAATGVLAAVVPQQEPLITPQEPPTHHHQEKFLIELAPYQTRWVTEEEKWDLKLDGVNFIDITEERNTGFYPTLHAGSYVHYPPTMEHAEKVVPLLQGLSKDNMEQNLNKFTSFHTRYYRSSTGIESAKWLYGRVSDVIEQSGAAKYGATVEQFAHSWGQFSVIARIPGQTNKTVVLGAHQDSINLFLPSILAAPGADDDGSGTVTILEALRGLLQSDAIVQGNASNTVEFHWYSAEEGGMLGSQAIFSRYKRDKRDIKAMLQQDMTGYTQGALDAGRQEAIGIMVDYVDEGLTQFLKDVTNAYCGIGFIETRCGYACSDHTSASKYGYPAAMATESEMENSNKRIHTTDDSIRYLSFDHMLEHARLTLGFAYELAFAPF
g58.t1	OJJ76812.1	OJJ76812.1 hypothetical protein ASPBRDRAFT_115047 [Aspergillus brasiliensis CBS 101740]	Aspergillus brasiliensis CBS 101740	100	352	0	0	1	352	7	358	1.29e-253	699	MESTDPYAKELQIACLTVQRATLLTKKLLEAVDKGSFDKNDATPVTIADFAAQALIIAAIHRAFPDDEFVGEESSDALRSDPALLDRTWELVSSTRLSDEESDALLYAPSSKEEMLDLIDLGAQGNCSPQSRAWVLDPVDGTATFIQGQQYAVCLSLVENGRQKVGVLGCPNMNLETGRLREDIVDRDGYGHQVFAVAGQGAFIRQMGTGALLPSRKIEPKTQITDPKDIDFVDCVSATSSNRDMHARLASHLGAPWPASTDLWAAQLRYIAIAVGGCNVMIKIPRKSSYRSKIWDHSGGMLIAEELGCTVSDLAGNPVDCSLGRTLAGCYGMIVAPSSIHSRLVEAVKQIM
g59.t1	OJJ76813.1	OJJ76813.1 hypothetical protein ASPBRDRAFT_70407 [Aspergillus brasiliensis CBS 101740]	Aspergillus brasiliensis CBS 101740	98.6	293	4	0	1	293	1	293	6.30e-207	576	MSTYNPFAKRESHDRFSLGTYRVLVPLSWLLVVVVGIYYSSHAPDVKHGHTIWKQANKHITPFSLSTVISGIYWIITLISQIGFVYHLFSNDAVTATAAANVASHFILNNLFIFAWILLWTRNHFWGSEIILIAHFLNQKATYWRHRTLPPLAHFAAVAAPYAWTLITLFWNGAVAVNSNSLPARIVANVFIWVLFALGSTHILSTQDDILGYSLSLLTLALAVKQFGVKIISLQWVFAIVIFAVFFAESLYISLTKYSGRNIFFRRAGQPAPATDREREPLLNDSTQPAQTA
g60.t1	XP_035351643.1	XP_035351643.1 chitin synthase A [Aspergillus tubingensis]	Aspergillus tubingensis	97.7	1069	25	0	1	1069	1	1069	0	2080	MNNSSRMYVPAHNQEEEPPAYDTYGDTYFNEHDSPPAAGRMHGATMRLLPTSTTVESDLSADTGASSEYHYGDPYVDDGESERQRYYPYEPTESPSRPVSSLGNVPTIPPPAASTVDVPHYTSRPGSPTRPWSPNRVGNWARPPAPPSVASSQYERADLNGSPRPGTPSSRYGGSPRRPLPPAPLFSAPGGNDANIPINDAGDDDVFGGGGRTIDPRADNRASMQSFMSESTIITDEKDAMSKVDLDDEMEETDEMVDPNIHYGPAPEKQGRRGVREAQMSTKEVQLINGELILECKIPTILHSFLPRRDDREFTHMRYTAVTCDPDDFTQRGYKLRQQIGSTMRETELLICITMYNEDEIGFTRTMHGVMRNITHLCSRSKSRTWGKDGWKKIVVCII…
g61.t1	OJJ76816.1	OJJ76816.1 hypothetical protein ASPBRDRAFT_216443 [Aspergillus brasiliensis CBS 101740]	Aspergillus brasiliensis CBS 101740	99.1	551	5	0	1	551	1	551	0	1101	MSLSWELQAQKARDILQESIPKQWLLPAHKLPSADLKNVEDFPRKSGLLSARELSITDMSAATLVQNMGTGKFTAEEVVVAFLKRSVLGHQLLNFATEFLTDRAIARAKELDEYYRRTGKLVGPLHGVPISVKEHVEVKGLTCNAGYVAWVDDVATQDALILQCLEKAGAVFHVRTNQPQSLMHLCCSNNLTGTTLNPYNRTLSAGGSSGGEGASTGFKCAPLGIGTDIGGSIRAPAAFCGSYGFRPTALRNPMTGAKAPEPGHESIRGVIGPLASHSVEDMDLFQQAIIDQEPWDIETSLAPIPWKRAKPTKDMTVAIMWDDGVVRPHPPITRALKHAKAKLQAAGIKVVDWEPYKHKHGWDIISAMYFPDGALSQRKLIAQTGEPILPLTAWAFAYS…
g62.t1	OJJ76817.1	OJJ76817.1 hypothetical protein ASPBRDRAFT_216657 [Aspergillus brasiliensis CBS 101740]	Aspergillus brasiliensis CBS 101740	95	397	2	1	1	397	1	379	8.03e-258	712	MVLKISRATRLTVVVAISSAFFVAEISVGFYTHSLALVADAFHYLNDLVGFVVALVALKVIHGIFKKVAAGTEIKHQVSEAGESPKALSFGWQRAQLLGAFFNGVLLFALGISIFLQSIERFITLQRVEDPKLMFIMGAIGLTLNLISATFLHEHHHHEHGHEPSSEGLEELPVPTADGIIDRERPGIPNHNDHKHLSHGARTASHGHDLGMLGVLIHVIGDAANNVGVMAAALVIWFTHYGGRFYADPGTSMGISMMIMLSSIPLVRRCGSILLESAPNGVDLEDVKHDLEKIPGVLSVHELHIWRLNQHKALASVHVMVSDCSVSDFLKLSKTINECFHAYGIHSTTLQPEIARPEVIAVGRPTVEAEELSSQTEMSEKCQVICGTLCEELTCCG
g63.t1	OJJ76818.1	OJJ76818.1 hypothetical protein ASPBRDRAFT_35995 [Aspergillus brasiliensis CBS 101740]	Aspergillus brasiliensis CBS 101740	99.6	716	3	0	1	716	8	723	0	1461	MVTKQDDLARDTVQLSGVQPMTTDYGIKISDPDHWLRVVDGQHNGPSLLEDPIAREKIMRFDHERIPERVVHARGAGAFGTFKLHQAIPDLSSAGVLNDTERETPVFVRFSTVQGSRGSADTVRDVRGFAVKMYTAEGNWDIVGNNIPVFFIQDAIKFPDVIHSVKPEPHNEIPQGQSAHNNFWDFQYMHSETTHMQQWIMSDRAIPRSYRMMQGFGVNTYCLVNDKGQRHFVKFIFTPELGVHSLVWDEALKIAGQDPDFHRKDLMDAIEAGQYPRWKFGIQVIPEEKKNDFEFDIQDATKLWPEELVPIQYIGQLELNRNVDEYFPQTEQVAFCTSHIVPGIDFSDDPLLVGRNFSYFDTQISRLGPNWQELPINRPVCPYMSLVNRDGQMRHRITK…
g64.t1	OJJ76819.1	OJJ76819.1 hypothetical protein ASPBRDRAFT_35996 [Aspergillus brasiliensis CBS 101740]	Aspergillus brasiliensis CBS 101740	99.5	559	3	0	1	559	1	559	0	1102	MSGSSAKLCADYLPGALRARGPLLRAVPRGTRRPGAREYRRGAHGANNSRYRPSVTAHRVPVRDTVDVRLSQGQYARRFATAAEGKAVEVDAAAGMQGGGPLVEYDLRVQQGRLRDDPYQRQIIEQLQDLYERLRSYNPPPVVHPSVESLDPKPKSFFGSLFGRNAKQEVTIPESLPKGLYMYGDVGCGKTMLMDLFYETLPSNIKTKTRIHFHNFMQDVHKRMHVVKMKYGNDFDALPLVAASIAEGSSVLCFDEFQCTDVADAMILRRLLESLMSHGVLLVTTSNRHPDDLYKNGIQRESFIPCINLLKTALDVINLNSPTDYRKIPRPPAAVYHHPLGPDADHHAQKWFDFLGDPINDPPHPATQEVWGRKIHVPLASGKAAKFSFQQLIGSATGA…
g65.t1	OOO03837.1	OOO03837.1 SAC3/GANP/Nin1/mts3/eIF-3 p25 [Aspergillus oryzae]	Aspergillus oryzae	80.1	1083	186	9	1	1074	1	1062	0	1655	MSSGIPPWRVAASATATTSIHSGHVAPAYIPVQARRSIASTKTTNPVPSPSTPTTSSDAAARKRVEFPEAVRKYVQRSFAPENRLSGVERSEMEAKLKSVITQAAEGNMLDQIDWETLPLPQVMVQNDRNMVLASPNVSNLHISSPNVSTWGAATGTISPKKSSSSLVDLSKKRKSVEYHGDASSCPPWRQTNSQNAFEDRVTYPSTDKRQKIDSKNTSKSKANLEMRRKRFEEAQGRHGSSPSSRGDSPAPNANQGPVVGRCQELEKNYFRLTSAPNPDTVRPLPVLMKTLDLLKKKWKKDNNYGYICDQFKSLRQDLTVQHIRNEFTVSVYEIHARIALEKGDLGEYNQCQTQLRALYAQQLGGHPTEFKAYRILYFIHTRNWTAMNDALADLTAAD…
g66.t1	OJJ76822.1	OJJ76822.1 hypothetical protein ASPBRDRAFT_49854 [Aspergillus brasiliensis CBS 101740]	Aspergillus brasiliensis CBS 101740	99.2	623	5	0	1	623	1	623	0	1201	MFFKPLDLTTALRPSLLPDETLLFVQDAVGLYEGKYKIPNYQNGHAYLTSHRVCYVAVDEPRKYSVGIDLKDIDRTEYQASFWKSSPKITVYPKPLKNLDRSKSAGASPSRSQSPLTPKPVSHLSAGLPPPVNATWVCPICSFSNPVPSNFDPSTATASTPIPPCLACGIKPPLATILKAAITAATSRESSVATPPISQAGHEASLESNGSKNLMAPQNGAQVSCPRCTFVNHPSLIECEMCGGSLVTANILKVSNGDHYRAESPAPVFDQGSIKSKQIKDSMKLSFRGGGEKIFHERLKGALIQRKWLLYNAPPVPQQPSQASSEAQGLAVPASTNGPGTSQPRSHGVGIAGLERRGLEARKNNELVIGNAFEDLEALMASAKQIVALAETLARESGM…
g67.t1	OJJ76823.1	OJJ76823.1 hypothetical protein ASPBRDRAFT_112547 [Aspergillus brasiliensis CBS 101740]	Aspergillus brasiliensis CBS 101740	93.3	608	41	0	1	608	131	738	0	1055	MDQFKREIDKDPYAALFGRRLEPFSSFEKLDNAFTSICRSFLGLDKSKSTMDTTARPKATAGASKDSSGPPKKSYPETSGSVPPSDEIVSERDRTSYEFDPVSGRMLPKEAVQRAATGNGSRGNDIDASVETQKPHSGPTGYLSPFERSVIEPKPATILENGRAEENSQQGVEVAPVADEPFQDPEVQKSDPSTQTRYRAYEPSIDASKNQRDVSEKVSSLPEVIIADQPKAQDFSIGSGRDTYDHLEAPVNSRPVGDQQSHESLMRYPAAPDSTLSTALEQDRVQAERNEDLDLISASDIRSHYLARPNVDPEIEKQIRQSLDDRFDSLVDPAGDIDAQSVRSKFQKHENVGPSGPEESGVGTQPDQQTAESREASQVLHSGKQEATQRFNQTPTIRQ…
g68.t1	OJJ76824.1	OJJ76824.1 hypothetical protein ASPBRDRAFT_190172 [Aspergillus brasiliensis CBS 101740]	Aspergillus brasiliensis CBS 101740	84.9	437	12	1	1	383	1	437	1.18e-265	734	MDSRSILRQRQAVEAAARYKLYKARKELNAELQKRRAIKKMILEQREAEGALPSEDDRLPMFHIMETIPEVSEALPVDIEVHGIRARFYPDRPDEDIVPRRYLEKAEYDYIVHRPVWIFSKAKDGHKVDIETWPTLNTNFYDVFRNLNESPQWKKGLFEDDEGAAATCPRGSTFEEARLYQDNAIHALLSELFFRVDVLRATTTLVSLSEHQPLRVTLCANFKMHLTQLANLRHLPSRADHLPDQEVFVINLHGSRLHVQRAIFPGSKTSRAWCGKYHPVGGNRELHVFKASDTSRRYTERDMEWDIDQLDWLHTLRDDERETPDEDGRPVFRVLASQEYDLWTKSGWHAALRLLAGLNHYLMGGRAKCAVMQVMFREFPVEE
g69.t1	OJJ76825.1	OJJ76825.1 hypothetical protein ASPBRDRAFT_49856 [Aspergillus brasiliensis CBS 101740]	Aspergillus brasiliensis CBS 101740	94.4	144	3	1	1	144	1	139	1.09e-87	262	MSKATRIPIRTQKAPLPPPFLSQGIVVGDMVFCSGQVGVNPATGKMVEGSIQERALTKDQKQILKNLGAVLEAGGSSLQDAVKMNIFLADMNDFAAVNEVYSSFFADPKPARTCVAVKTLPMGTDVEIECVGVVNSVPTRGSRL
g70.t1	OJJ76826.1	OJJ76826.1 hypothetical protein ASPBRDRAFT_112518 [Aspergillus brasiliensis CBS 101740]	Aspergillus brasiliensis CBS 101740	93.4	1013	45	2	1	1002	1	1002	4.22e-293	851	MIVPTTSLLAAFLSVGGLELVAAREAGQIRDLGAREVSSAALLSSQPVTPVELTTRSETSTHESAPTSENDQTSPVVDPSPAVIVVPVTISVDANGVTHTIVGTAPFVPGASTTTSSTIERAESTPAPAAAKSTASATTSDNDSTTSDSKKHTSTSESEKHTSSSESSAKPETRSTSSTAEAETPSSSAAAAAAAATTSSQSSLAESWESFISSILGSSTSTSAPSTTASPTASPAESSSATPAPASSSAGVIVDVTSSKSSTSDGSTTSESSTAKETKDSTTQSSSSSPASSTSVSTAESSAEASKSESVTPSSKAETSSQLITSQSTSAPSSSAQTPLAESTSKSESESQSSSSQVTSVQATSSGAATQTTGSVSSSLIPSASQDVSSSSSTPAASG…
g71.t1	OJJ76827.1	OJJ76827.1 hypothetical protein ASPBRDRAFT_190175 [Aspergillus brasiliensis CBS 101740]	Aspergillus brasiliensis CBS 101740	99.7	345	1	0	1	345	1	345	9.87e-253	696	MFWGKQHHDDTPEAAQQPIPRKKLPSHLQTLADHDDGFYDDIYSSYSVDSTETPYRYAGYANRLRTVLLSAHRYVAYTSDIGESFRPVAHPWLVRSAYGISWTYLIGDVAHEGYKAYLRNRRVLAPPCEAYKDASDLTHDKVAKGMVTGNIAGSLTGSGDTLMPWPTAHVPLAEDYRMVMAQRAVFQSIASMGLPAFTIHSVVKYSGRMLKNSRNVFFRTWAPIGLGLSVVPFLPYLFDKPVEEAVEWAFHTGLRAYAGEDAVRPLPQAVRVPHDEATSLSHFLKVQAEKNNGEVMGTDANLSWEQYKEERRRAKEQRMQEREQRGEKGPLAFLGFGSSSKEKKE
g72.t1	OJJ76828.1	OJJ76828.1 hypothetical protein ASPBRDRAFT_190176 [Aspergillus brasiliensis CBS 101740]	Aspergillus brasiliensis CBS 101740	100	73	0	0	1	73	1	73	2.84e-42	142	MVVYYQIAGKQVGSHVLAMSVLGALFGGVGLATRGGGQPKPATPPIQASSKDEENFIQDFLKQVNGEEKKKDH
g73.t1	OJJ76829.1	OJJ76829.1 hypothetical protein ASPBRDRAFT_49859 [Aspergillus brasiliensis CBS 101740]	Aspergillus brasiliensis CBS 101740	97	164	3	1	1	164	1	162	4.26e-93	277	MKPTPFPFALNIGTDIVHLPRITRLLARPNYLTRFTHRILHAREQQDFRTRFSLPALPALIPSSSSSSSSSPAHAPTPSISISPDMTRWLAGRFAAKEAARKAAPRGAAHISWKDVVVTVGEDGGRPEVVYLEGGGEGEEAGRVGKLSISHDGEYVVAMVVAAG
g74.t1	OJJ76830.1	OJJ76830.1 hypothetical protein ASPBRDRAFT_112786 [Aspergillus brasiliensis CBS 101740]	Aspergillus brasiliensis CBS 101740	99.4	314	1	1	1	314	1	313	1.08e-231	640	MPFTHHSHSGQFCPGHAKDNLEEIIQLAISKKFHTFCLTEHMPRHEEDFYPEEIEAGDTESSHVANEAAYFAEATRLRTKYADQIKILIGFEIDWIRPASRQLIEESLSRHPFEFFMGSVHHTLTVPIDYDRPLYEKARALAGGTDELLFEAYFDEQLDMLKQVRPVVVGHFDLIRLKSDDPDRSFQEYPKVWEKILRNLDYVAGYGGLLEVNSAALRKGMKEPYPNGEICKEFLARGGRFCLSDDSHGLEQVGLNFHRVVPFMEQVGMSRIHYLELAKEDDDDSAPVVDARFPRTQIKSVTLEEVKNMPFWRQ
g75.t1	OJJ76831.1	OJJ76831.1 hypothetical protein ASPBRDRAFT_36014 [Aspergillus brasiliensis CBS 101740]	Aspergillus brasiliensis CBS 101740	93	114	8	0	1	114	1	114	6.07e-74	225	MGVTKETISPGNGQQFPKKGDTISMHYTGCLYDESKPNKMGKQFDSSRNRGVFKTEIGIGRLIKGWDEAVPQMSVGEKAILTITPDYGYGPQGFPGLIPPNSTLVFEVELLGIN
g76.t1	OJJ76832.1	OJJ76832.1 hypothetical protein ASPBRDRAFT_36016 [Aspergillus brasiliensis CBS 101740]	Aspergillus brasiliensis CBS 101740	97.8	582	13	0	1	582	1	582	0	1166	MASALFWLSLLGSSAFTSALDTSSTPTIRRADAGNTSSSSSIPTATLNNTVFVGRSLPEFEQELFLGIKFADEPVRFTPSTLKTAYRANDSDNGVYHGSGLQASSGTAVLYNATEYGYDCPGYGSDETKLAEEGYARFDEDCMNLNVIRPKRENEDELLPVMIWIFGGGWVQGATADPRYNMSYIVRQGALNDKPVLGVSINYRVAAFGFLDSVEVMESGNTNLGLRDQRVAMHWVKQNIKAFGGDPDKITIWGESAGAYSVGAHLVTNDGDNEGLFRAAIMESGNAVGPPYNGTDWHQPMYDQIVNATNCTTSSDTLQCLRELPFSAIYSAANLGLEWFATIDGTFIKEYPQISITEGRFAKVPILHGTNTDEGVSFGTTGVNTDAEAIQQLMASKRW…
g77.t1	OJJ76834.1	OJJ76834.1 hypothetical protein ASPBRDRAFT_49862 [Aspergillus brasiliensis CBS 101740]	Aspergillus brasiliensis CBS 101740	99.2	639	4	1	1	639	1	638	0	1202	MSSNGGFADLFSLGTASTTNTGRRSTSTIRSRNRRLISFTDDDGDENGKQMQSSGLSSMLSPDNSTVRSRGATPSPNPSRGVSPIPMRHPSRATEAANRSKGNSSLGGFCREEESGMMFAESSRAAVDFFDASWTSLQSLASSVLGSDIARPATTNGSTRTHVRKPSRPDPYMRPPARTSTPATWGPSAPSTPEIGSGTQEERQALVQAKKREALLLADTGPAWSTTARHKRRDSSDRTGHSNIDPDLDEDALAYIHHVQSTDTITGVTIRYGCQPAVFRKANGFWPSDSIQGRKTVLLPVDSCTVKGRPIRPSMGEDLLGDDRPERESLEDMNGSSIAPTSAPRSTEGTASASPAAEIEGDRIWKHESWVHIEGFPAPVEIGRVPRRALGFFPRTRRK…
g78.t1	OJJ76835.1	OJJ76835.1 hypothetical protein ASPBRDRAFT_190181 [Aspergillus brasiliensis CBS 101740]	Aspergillus brasiliensis CBS 101740	100	415	0	0	70	484	1	415	8.60e-259	720	MDATRVTLSSACARAPPPPTANNNTVAVKHVTPSAKPRLRPLSATTALAVADGRSDPHLNGHLFRYSVVMASARGPRWQQFLQELVMVAGTSASAYFLIRYLLSRLDFDPESQKKEEQRRKSAAILRKLDGGDESDEDSPRRGGKGGRRPKRGELVLNQYEQAIAMDVVAPDDIPVSFEDIGGLDDIIEELKESVIYPLTMPHLYASTSSLLTAPSGVLLYGPPGCGKTMLAKALAHESGACFINLHISTLTEKWYGDSNKLVNAVFSLARKLQPSIVFIDEIDAVLGTRRSGEHEASGMVKAEFMTHWDGLTSANSMGEPQRVVVLGATNRIGDIDEAILRRMPKKFPVALPPAAQRLRILSLILKDTKVDRDNFDLQYLVKGMAGMSGSDIKEACRD…
g79.t1	OJJ76836.1	OJJ76836.1 hypothetical protein ASPBRDRAFT_190182 [Aspergillus brasiliensis CBS 101740]	Aspergillus brasiliensis CBS 101740	93	527	32	1	1	522	1	527	4.60e-275	768	MPKRKAAAALSGPAGDDDPMQANDSGRERPTKKQRGRPRSKSAEMKPLTQSGRDSSTAAPQASEAPTRKSGRRGRPKGSRNSVQATQDTSEEQAEIKESEPEAGEQEAEGTAASNDEADDVQDVAKPTRATKTTRAAPRGRKNATIRNSAQTDGGFEYTPSTGRQRKSLDKPEDRPEPPKRQRRKPEVEDNNDAPDDESPAPDVVDETVLQDAPVEPRSVSLSPAKRRQSQRGIYSSPSKSRLGGTADDKANVEPELRRRIGELTKKCDTLENRYRNLKEIGIVEANANMEKLRKQCESMTNASNNLIASLKAELEAQKALGQQSRSLQRQLKERDAEVAQLKSQAEEATGQLSSAQTEVKALQTKLAAARNTAASLENAAIKMPGSAIKGGANRANAA…
g80.t1	OJJ76837.1	OJJ76837.1 hypothetical protein ASPBRDRAFT_70423 [Aspergillus brasiliensis CBS 101740]	Aspergillus brasiliensis CBS 101740	99.4	998	6	0	1	998	1	998	0	1922	MARLGRVGFLTLAVVFHLIYAYSIFDIYFVSPIVSGMSSFRVEREPDAAAPAKRLVLFVADGLRADKAFQALPDPDDTTGLDADPVYLAPFIRSRVLSHGTFGISHTRVPTESRPGHVALIAGLYEDVSAVTTGWKLNPVNFDSVFNRSRHTWSWGSPDILLMFQEGAVPGRVDADTYGEEEEDFSSDATRLDTWVFEKVKDLFASAKTDPELDAKLREDKVVFFLHLLGLDTTGHFSRPYSKEYLRNIKLVDRGVQEITKLVEEFYGDDETAFVFTADHGMSDWGSHGDGHPDNTRTPLVVWGSGVAGPRYTQEGTPTGHEDGVSSDWGFDGIQRNDVAQADVAALMAYLAGLDFPTNSVGQLPLQYLDASPKDKALAALANTQEVLEMYRVKEEQKK…
g81.t1	GAQ43029.1	GAQ43029.1 cutinase transcription factor 1 alpha [Aspergillus niger]	Aspergillus niger	98	867	16	1	1	867	1	866	0	1684	MAPVLPVPASAPVRCDAASLGVPCTNCVAFSIECKIPTPKRKKNQTKSKETSGGEEAESKSPPQSKPEPTPVESGKDAFGYHRNRMAVDGMPVTSLTESQAAQQASHNSMYAQFMKPKFARAPIKEPGRVAYLGESSNLSLLVQDRHGTTDVVHYPLPPNMGGTPARLTDLDSLELDILHQRGAFLLPPKPLCDELVEAYFKWVAPVVPIVNRSRFMRQYRDPKNPPSLLLLQAILLAGSRVCTNPQLMDANGSTTPAAMTFYKRAKALYDANYEDDRVTIVQALVLLGWYWEGPEDVTKNVFYWTRVAMVVAQGSGMHRSVESSQLSKPDKRLWKRIWWTLFTRDRSVAVALGRPIGINTDDSDVGMLTEDDFIEDEIDIAAEYPPDPVHVQFFLQYV…
g82.t1	XP_001400722.1	XP_001400722.1 cystathionine beta-lyase [Aspergillus niger CBS 513.88]	Aspergillus niger;Aspergillus awamori;Aspergillus niger CBS 513.88	97.7	433	4	1	1	427	1	433	7.59e-300	822	MSAAGSSSDAAVKKAFPRVDLEGHDLPPSPAPSSPHGGRRYNIATELVYTEGNDQYNASSVPIYQTSGGGGGEYDYTRSGNPTRTHLERHLAKIMSAQRALVVSSGMAALDVISRLLRPGDEVVTGDDLYGGTNRLLKYLATNGGIIVHHVDTTVPEKVREVLTSKTAMVLLETPTNPLIKVVDIPQIAAAAHEANPNCVVSVDNTMMSPLLLNPLELGADIVYESGTKYLSGHHDLMAGVLAVNDLSLGDRLYFTINASGCGLSPFDSWLLLRGVKTLKVRMDQQQSNAQRIAEFLEAHGFKVRYPGLRSHPQYELHHSMARGSGAVLSFETGDVGVSERIVESAKLWAISVSFGCVNSLISMPCRMSHASIDEKTRRERAMPEDLIRLCVGIEDADD…
g83.t1	XP_041542863.1	XP_041542863.1 uncharacterized protein AKAW2_40783S [Aspergillus luchuensis]	Aspergillus luchuensis IFO 4308;Aspergillus luchuensis	94.7	318	15	1	1	318	1	316	3.18e-204	571	MPRNALSSEAPLPMSAITEQSISSDWNTNRLGARLGVDIASAATAGALTCPVITVIDRAIIEKAAKGVPIRQTITSCFRSMLTKPGSFFLSTPFLLIYTLYTSTYLTANTIDTFTSTVRDKPFSTVFPGTAKFLTTTAVNMGICVYKDARFARIFGANPSPPAATASGPTSAPRPTSTSTSAPASCHPSGAAQVPKVSYALFCLRDSITIFASFNIPALVAPSIPDSIASTPGMKAALAQFSCPALMQFASTPMHLLGLDLYNRQPPGGLGWRERTSRIRRDYIPSCFARMGKIVPAYGVGGVVNVRMRASLMEYLEGGK
g84.t1	OJJ76840.1	OJJ76840.1 hypothetical protein ASPBRDRAFT_190187 [Aspergillus brasiliensis CBS 101740]	Aspergillus brasiliensis CBS 101740	98.8	480	6	0	1	480	122	601	0	940	MTLGPRPYYWPNTATVSYGSSPPIATRTGWMALALLPFVLALSAKANLISTLTGVPHEKLQVFHHWTSYAMFVLALVHTFPFIVYHIDKGDMVDQWKTEVTYWTGVAAIIPQAYLTFMSLPAIRNRFYEFFKATHFLAALVFVVFFFLHCDFRLSSWDYFIAAGAIYILSLLVSNIRTYFMHGRHTATIEQLPCGLVQIRIPTIMTWRPGQHVFVRFLSLQQGIHCLSAHPFTICSLYHDPEQAGKAPEITFYVKPRRGLTASLGNTALEKPSSTETVLLEGPYGGMSESVDFTRFDTYVLITGGTGGGFSLAILEEALRTHQQQQLTATIQVHFATRTAALADWYREEIKAKLAAYNVLSDKISLSIHVTKETLLSTPASGSPLIPDSVEKREPAGFV…
g85.t1	OJJ76841.1	OJJ76841.1 hypothetical protein ASPBRDRAFT_24555 [Aspergillus brasiliensis CBS 101740]	Aspergillus brasiliensis CBS 101740	97	540	13	2	1	538	1	539	0	1061	MTNINGNNVYFGPDALKKYFDPDCQPPLPLVELPDRLNPFHQDGVRIYAKMMTMHPANNVKAIPAMNLLEKTVVPGKTKTIVEFSSGSTVISMSMLARLMHGISDTRAFLSNKSTETKLRLMQFFGLDVTLFGGPSQPDPLDDRGGIQTARAMAMGSDEIVNPNQYDNDDNWRAHIRWTGPQIFKQLPEINVLCAGMGTSGTMTGLGTYFKEVKPSVLRLGVCTAPGDRVPGPRTFALMEVQEFPWREALDVHEEVSSYDSFSLSLDLCREGIVCGPSSGLSFKGLLQMLEKRKSAGTIRQLAGPDGSIHCVFLCFDLPYQYVGDYFEKLGPERFPPIRNQKLAGVDLYRYDESWERSPAVLFTDYYELPQFFSTNLLSNMVLRPQCCVLDLRTVGDFG…
g86.t1	OJJ76842.1	OJJ76842.1 hypothetical protein ASPBRDRAFT_24556 [Aspergillus brasiliensis CBS 101740]	Aspergillus brasiliensis CBS 101740	94.9	568	7	1	1	546	1	568	0	1028	MPGASIEDELKHGNQLVVSGDVVAESSEESRSAAPPPIFNEQTNYVPLSTIITIFLACSTVDLVAVMDQTTLAGSLSIIGNELNASNQTSWISGGYFLTSTCFQLLYGRLSDIWSRKYVLYVGLAIMFFGSLASSLAQTSTQLIIFRAFTGIGGGGIMSIAQMIVSDVVPLRERGKYQGILGAVVAIANGIGPVIGGALSPISHNSWRWIFRLMLPLTAISTLAVMFFMPLRKVTGDWKAKLKAVDFFGVFLALGGTAVLMLGLTWGGGEYVWKSTHVIATLIVGFAVCVAFIVWEWKGHPYPLVPMHIFKSRIVNGACLTMFINGWNIIVMLYYIPTFYQLVFNYSTTKAGAMVLPITLLQTVSSTLSGLVVHWVGRYRESILVGWMIWAIGLGLMST…
g87.t1	OJJ76843.1	OJJ76843.1 hypothetical protein ASPBRDRAFT_201926 [Aspergillus brasiliensis CBS 101740]	Aspergillus brasiliensis CBS 101740	99.2	729	6	0	1	729	276	1004	0	1442	MVLSLSVPSFARATNSSALRASDSSNSTTISEALRNNPFGITSRSRALASNTTSEEQKREQEELNQALQTLARIFPDIRIEVFRELLVRFDGQSRLHVCVEQLLRHKEAWVAGRWNVPAGAGGTEEDGKNDLHQHTGHELAVPPEELFRTNEYKAAVKSALTKEFSGLSKSTVEAVLAEVNFCYLRARPTLQDLSRRTWRATFNSILPSFKRGKDKNEHPLIVWQRQPDGDVIPRLKKTECPELDRELYRALLAPLLRTSREERLDRDQKLAEELNEAEAREADAVYECECCLDDVTFEQISTCSANTHIICYGCIRRTIHEALFGQGWGKSVDVEKSTLKCLAPFDHDSCRGTLDPAIVKQAILLDKAGLETFAKFETRLSSEVLLKSQLKLIRCPFC…
g88.t1	OJJ76843.1	OJJ76843.1 hypothetical protein ASPBRDRAFT_201926 [Aspergillus brasiliensis CBS 101740]	Aspergillus brasiliensis CBS 101740	93.1	246	17	0	34	279	1	246	2.35e-157	474	MPSSSSSSSSSSSQLLIHLIPCIADIPPSQILGMGSTGLVIRHNHHPKQAIKVPLRWDTSTEEDLATKLESLHHEQSIYNRLGTHPGIVPVLAYSTTSITLQLMENGDLRSYLDQDQDKLLNLPSKHHLFLAWFRTMAYTLAYIHDRRVVVADIAMRNFLLDGDLGVKFCDFSEARVFPLETFMSTAAVDEGGGGYSVKTDIGQLGAVMYEVVVGVKCVFDIWGDDGDGHAVWPRREDLPGTEGVWLGEVIERCWTEGDGGFGSACELGGVLDEISILS
g89.t1	OJJ76844.1	OJJ76844.1 hypothetical protein ASPBRDRAFT_36029 [Aspergillus brasiliensis CBS 101740]	Aspergillus brasiliensis CBS 101740	99.4	901	5	0	1	901	1	901	0	1783	MSELRFDNQTVVVTGAGGGLGKAYALFFASRGANVVVNDLGGSHSGEGKSAKAADVVVEEIRAAGGKAVANYDSVENGEAIIETAIKNFGRIDVLLNNAGILRDISFKNMKDQDWDLIYRVHTYGAYKCARAAWPHFRKQKYGRIINTASSAGLFGSFGQANYSAAKLGQVGFTETLAKEGAKYNIIANVIAPIAASRMTATVMPPEVLENLKPDWVVPLVAALVHSSNTTETGGIYEVGGGHVAKLRWERAKGALLKTDASLTPGAIARKWNDVNDFSQPHYPTGPADFMGLLEDGLKLPSAQKGEEPNFKGKVALVTGGGNGLGRAYCLLFAKYGAAVVVNDLVDPEPVVQEIKKMGGQAVGNKASCEDGENVVKSAIDAFGRIDILVNNAGILRDK…
g90.t1	OJJ76845.1	OJJ76845.1 hypothetical protein ASPBRDRAFT_115236 [Aspergillus brasiliensis CBS 101740]	Aspergillus brasiliensis CBS 101740	98.1	319	6	0	1	319	1	319	3.20e-229	634	MPEIIDDKSQHCIPFLLERLQAHQARHDPTNTPPFFLGLNGVQGAGKTVLVSTLQSTLRSAPYSLNVVTLSLDDLYLTHSQQEHLAASHPSNPLLQHRGQPGTHDLTLAKEVFSALRAGQRTAVPAYDKSAFSGQGDRVPASQWEVVNKEGEEKVKVVIFEGWCVGFRAWDEEILKRKWEDAVRVKESGAGYNGRLGYVRFEDVKTVNEALRGYDVITDQLDALIHIDAQDLHFVYDWRQEQEKTLRAAKGTGMTEEQVTKFVDGYYPSYELFTETLREGTFKPVPHATTASAPPTGWEGRQLRLVVDKNRRVQETIKI
g91.t1	OJJ76846.1	OJJ76846.1 hypothetical protein ASPBRDRAFT_24561 [Aspergillus brasiliensis CBS 101740]	Aspergillus brasiliensis CBS 101740	100	251	0	0	1	251	1	251	1.57e-170	480	MASTATTVPTKEQVLVPETLLKKRKSQEQARAVAREEAEKKKAANKEKRAVIFKRAESYVKEYRDAEREKIRLARVARKEGNFYVADEPKLVFVIRIKGINKIPPQPRKILQLLRLLQINNGTFVRLTKATQEMLTIINPYIAYGYPNLKSVRELVYKRGYGKVDKQRVPLTDNQIIEEHLGKYGIVCMEDLIHEIYTVGPNFKQANNFLWPFKLSNPTGGFHTRKFKHFIEGGDYGNREENINGLIRQMN
g92.t1	XP_001400731.2	XP_001400731.2 vacuolar-sorting protein dot2 [Aspergillus niger CBS 513.88]	Aspergillus niger;Aspergillus tubingensis;Aspergillus awamori;Aspergillus niger ATCC 1015;Aspergillus niger CBS 513.88;Aspergillus brasiliensis CBS 101740;Aspergillus tubingensis CBS 134.48;Aspergillus luchuensis IFO 4308;Aspergillus luchuensis;Aspergillus luchuensis CBS 106.47;Aspergillus welwitschiae;Aspergillus neoniger CBS 115656;Aspergillus vadensis CBS 113365;Aspergillus piperis CBS 112811;…	100	262	0	0	1	262	1	262	9.51e-182	509	MATRRGVGLGAFANRTQASQSFANHGANLRSSHLSSLQTQLSVFQSLLHTFALEHSSTIKSNPTFRAEFARMCNAIGVDPLAASNVKGKNARKGLGEIGSFWTQIMGGDMNDFYFEVAVRVVELCRATRSENGGLIGVEECRKRVGKGKAIGSGLEVTDDDVLRAVKSLEPLGSGFSIVHVGSKQYIRSIPKELNTDQATVLEAIQVLGYVSISMLQANLNWEKARAQTVIDDLLADGLVWLDAQAEENEYWSPQNLLDDSG
g93.t1	OJJ76848.1	OJJ76848.1 hypothetical protein ASPBRDRAFT_114078 [Aspergillus brasiliensis CBS 101740]	Aspergillus brasiliensis CBS 101740	99.8	814	2	0	52	865	51	864	0	1532	MSRFFYGGGSDSESSSSEEEELYSDREEEEEQSEEESSEEESEEEEESSDDEDAGKTGANRFMKNVSESEESEDEERVTVVKSAKDKRLEELESTVKLIENAEKINDWAVISTEFDKLNRQIVKITQSGPTPKIYVKTVADLEDFVNETVSKQKSSNKKMNASNAKGFNAVKQRIKKNNKDYAVQIDRYRKDKDGFMEAKEEVARPAVAAPRLTKIERFEAPAATTAGDDDGFATVGRGGKTLQYTPESILKHLRVIVESRGKKNTDRLEQIRTMEKLLEVAQTPYQRIRIYLTMISTRFDLTSSSTSNYMAVDQWKFAEQEFATLLSVLENNRTYVVTEGAEEWEDDEKQPTPTPGEVLHIPGSIVSYVERLDDELTRSLQHIDPHTAEYIDRLGDEK…
g94.t1	XP_025510895.1	XP_025510895.1 kinase-like protein [Aspergillus piperis CBS 112811]	Aspergillus niger;Aspergillus tubingensis;Aspergillus tubingensis CBS 134.48;Aspergillus luchuensis IFO 4308;Aspergillus luchuensis;Aspergillus luchuensis CBS 106.47;Aspergillus vadensis CBS 113365;Aspergillus piperis CBS 112811	99.6	895	4	0	1	895	1	895	0	1704	MDPQWQAYQDPLMGHPAQFNNGLTSNPQQLASKYGAQPQHSQPPVGYTYEPFQSPGTTAKPSSIGANSRAVSMASSPAATPRSRDYVTDADTTMEDADPYNRAKYSTRPTHHSRPSSQYFPSEESSAARRYSPMNVLSPSMSFNASPGKSHNSYAFPPGPNQPRRSPTRGSTYASPPQAFQSPPSASRPPRLPPLQPTDMSPDQYYPPSAGSQLNAAFAQDGRSPRSASISGGSQQPGRGPVPKFQKIKSIQELQPRTNAQPPYRRANPDGGFISPLQALTTHLPATYRICNPGFNYESSRNPRRVLTKPSKGVKNDGYDNEDSDYILYVNDILGSEEAGHKNRYLILDVLGQGTFGQVVKCQNLKTGEVVAVKVIKNKTAYFNQSMMEVSVLDLLNSR…
g95.t1	OJJ76851.1	OJJ76851.1 hypothetical protein ASPBRDRAFT_113411 [Aspergillus brasiliensis CBS 101740]	Aspergillus brasiliensis CBS 101740	98.1	1219	23	0	1	1219	1	1219	0	2276	MDEENVKEVDFAASRHDSDEEMKKEEQPEQQAVSVSDPPESGASLNQQHSANFDEASRLRELQADVRDQDDLERDISRQADRLLMEQADERDSKRLEKTTSEKQKLESQILKLHQRLSQPVGTSARVRISNEIEKLESRNAALANDLTEIQQRMDERHQGQEADSQTTGTGRMPNESRRDYLIRTGKITPFSNMSSGPNHGPLASLQDALIDAEDERDEREALEQVKSRSAVSHRNLVRPGFGFDETPDSSIVDEAPTSRASKRRKIDRGSHGEEQEGFEQDTKVSFEDNFEDQDESASYVESEGQSSVSEDEEEFLPEERPKRTAKPVKAPKTSDEVEDFSGMDDGNEKLYQSRLQYWVSRRAAARKRALESRAASHGSEVDVPDQDEQEEWFMPHPT…
g96.t1	OJJ76852.1	OJJ76852.1 hypothetical protein ASPBRDRAFT_36036 [Aspergillus brasiliensis CBS 101740]	Aspergillus brasiliensis CBS 101740	98.3	173	3	0	1	173	1	173	1.66e-122	352	MKFLASLALLVSTVAAGPVLYPRQSSNSTRTFHLKTSGASNGDHNNLYVYGYHTGAGFNDAVLTSDVGMASPAFLNGTHIQFDLGTSFPWGLKMGVQNNYAAWESVQINVGYGDDDFSIGSTGVEWSAQDGFGGWLVCDWYHNAPQLFYIYRYEQPTIPSSCSTVDLTPEYTS
g97.t1	OJJ76853.1	OJJ76853.1 hypothetical protein ASPBRDRAFT_36037 [Aspergillus brasiliensis CBS 101740]	Aspergillus brasiliensis CBS 101740	99.6	279	1	0	4	282	1	279	3.33e-150	431	MRYMSRLFVLCLLLLLGTVTSAWPWRPHGELLRRADTTAAESATTGAAPTTDSASKTEAATKTAAATGTDTTATATGTDTKSATKTGTATGKSSGSSSNSTTSVSINPAAGAGGISMLTPNAESTSYYKIGDYVTFAWNYTSLTISPTAVNVVASCSLNSATYTISSNMTMSPTGKVVWDTKKYQANATVPLLTASYTLIVWDASKALTETASAGYLSAASSFIFGMYSSQPYTPLNGFVCATCSGAFSELERLGMKFTFGMFAITVLSFTWFAGGFGLFAT
g98.t1	OJJ76854.1	OJJ76854.1 hypothetical protein ASPBRDRAFT_24568 [Aspergillus brasiliensis CBS 101740]	Aspergillus brasiliensis CBS 101740	96.7	121	4	0	1	121	1	121	1.76e-49	164	MSSFWNPNNNPTSSSNHRRRRIKGKQRANAMPLFVSSTSGARSQRSSASNSTRYDDEDLVLVRRKGSAPWWWLLWTKGTVGVTVMKTEPETRRQRGNRVLEPLVEGKVASLFPPRLVDVEE
g99.t1	OJJ76855.1	OJJ76855.1 hypothetical protein ASPBRDRAFT_24569 [Aspergillus brasiliensis CBS 101740]	Aspergillus brasiliensis CBS 101740	97.6	332	8	0	1	332	1	332	1.28e-221	616	MASAPNPGQPLPRMPVVVPAMVPPPNGAEASTGGASNTDSDSEMQLVSSLAKLQKMEAMIHQLRTLLPERLLEPLAPIVNPKAAAGRSVPKSPQMLYEQLAQAARAGVSELQEFQSMWRSPEMKAVWDRIDAQIKENGGVMLQPTGKWERDYDTILADLREEEQTQNEQQQKANEEMERSKIQATEGGWRAIVEGFAQKNVPGVRVLASQSEAAVTVVLVKAGMVFRVEAIAGQDGNGVPDWRVFTKTPGGQTPSKAETAVAQCLNSRPRQWDLLYLLDMISSYSTIKQTPCAKCTKMTDITATLPTIRKPSSTPQESGSQTWTAYHQGCTE
g100.t1	OJJ76856.1	OJJ76856.1 hypothetical protein ASPBRDRAFT_114633 [Aspergillus brasiliensis CBS 101740]	Aspergillus brasiliensis CBS 101740	99.4	512	3	0	1	512	1	512	0	1022	MLAPAVIFFIAIYFTFHILRSLQQAYYHRKKAKALGCQPPTSVSTGILGITGFYRIAKAAREKRWVEFIADHYQTSGPTFRQQALGGLMVTNTVEPENIKALLATQFQDFGLGTRHREFYPLLGNGIFTLDGAGWSHARGMLRPQFTRDQVADLDLMDGHVTKMMDLIPKDGSSFDIQRLFFLLTIDSATHFLFGESVGSMRTSTESSLLEKSAVGNAQGFAEAFNRAQEYLAARSRAMAFYWLVNPKEFREANQLVHEVVDHYVRLALEAKRHPETKEPGRYIFAEALAADTDDPRVIRDNMLNILLAGRDTTASLLSSSFFYLARHPNVWARLRQTIVDEFGDAQHPKGKITHARLKDTPYLRYFLNEVLRLLPPVPLNFRVALKDTSLPSGGGPDR…
g101.t1	OJJ76857.1	OJJ76857.1 hypothetical protein ASPBRDRAFT_49883 [Aspergillus brasiliensis CBS 101740]	Aspergillus brasiliensis CBS 101740	98.5	542	8	0	1	542	21	562	0	1125	MGSRQGKSPFGWGTQSLAHFGINPELVTHNQQNINSLISHSAMATALEAEYVTIPIDHDNASVGTYQNRFWVSDEFYQPGSPIFVYDTGESDGEQLAQAYLTSTLSFFREFLIEFNAMGIAWEHRYYGSSTPAPVSYDSPPETYQYLTTKQALADLPYFARNFTREKYPDVDLTPQGTPWVMVGGSYAGTRAALTRNEYPETIFAAYSSSAPVQARVNMSVYFDEIYNGMVANGWTNCSADIHAALEYIDDQLADEDTATSIKQLFFGPGAETNSNGDFTAALTGIYGYFQSYGMAGGIGGLGAFCEYLEVDPQTNGTTGPEGLAPTYGGQYVAERWAAWPTFIELINMNMETNCGSQNASEPVDCNFSKPYGDPSAISWTWQYCSEWGFFQAVNEGPH…
g102.t1	OJJ76858.1	OJJ76858.1 hypothetical protein ASPBRDRAFT_218647 [Aspergillus brasiliensis CBS 101740]	Aspergillus brasiliensis CBS 101740	99.1	528	5	0	1	528	10	537	0	1040	MLSRISLLSLLSLAAGVVNADFGITTNDDSYVINANSPNSLVFTVDRGSCDITSIVYYGTELQYSGKGSHIGSGLGTATVSATKSGDYIKVTCETDTLTQYMVVHDGDPIIHMATYITAEPSIGELRFIARLNSDVLPNEEPFGDVSTTANGEAIEGSDVFLVDGETRSKFYSSQRFIDDQRHCIAGDAHRVCMILNQYESSSGGPFHRDINSNNGGDYNSLYWYMNSGHVQTESYRMGLHGPYSMYFSRSGTPSTDIDTSFFADLDIEGYVAEADRGTVSGTASGADSSFDWVVHWYNDDAQYWTYTSSSGSFTSPAMKPGTYTMVYYQGEYVVATSEVTVSAGSSTSKNISGSVKTGTTIFKIGDWDGQPTGFRNAENQLRMHPSDSRMSDWGPLTY…
g103.t1	OJJ76859.1	OJJ76859.1 hypothetical protein ASPBRDRAFT_114296 [Aspergillus brasiliensis CBS 101740]	Aspergillus brasiliensis CBS 101740	94.6	551	30	0	1	551	1	551	0	1060	MSPKYTLFVGTFIQLPRVKSEEGHKLAITRGALWVSTADGTIQGFDWTIANEKDLQRFLRQKKWTVVNDNDKNSHKARHGEKVTLVVAREEENEFFFPGFIDTHIHAPQYPNSGLFGDAGLLHWLQNYTFPIEASFGSSKFPSIPPPNAYRVYNQVIARTLANGTTCASYFATLHVPATNLLASLCHARGQRALIGRVCMDRPSQCPDTLRDESPDLAIQKTEASIAHIHTLDPSGSLIHPIITPRFAPSCTPRSLGKLSKLAASYSPPLHIQTHLSENLDELKLVHDLYPESKDYTSVYNYFGLLTPRTILAHGVHLSDDERAMIADTDAKLSHCPASNSALGSGICEVRKAIDAGITVGLGTDVSGGYSPSILETVRQACLVSRLLPHMSRTTSDTE…
g104.t1	OJJ76860.1	OJJ76860.1 hypothetical protein ASPBRDRAFT_36045 [Aspergillus brasiliensis CBS 101740]	Aspergillus brasiliensis CBS 101740	99.4	1060	6	0	1	1060	1	1060	0	2085	MAASWCALRGTRQLALRSRVRAAPSPIALRRASPLIRSLHTTTQQSPAARRPVYTSSVADHGVPHPPDLFQPLDTFPRRHIGPSPDAAKEMLATLDPPVASLDEFVKQVLPADILSKKDLKVSAPHSTANLPHSSVHGGLGETDMLKLLDTYRKQIDVSGKTYLGTGYYPTIVPPVILRNVLENPAWYTSYTPYQPEISQGRLESLLNFQTLTADLTGLPFANASVLDEGTAAAEAMTMSLATLPMSKQKKAGKAYVVSHLCHPQTIAVMRSRAEGFGINLVVGDILADDFKLVKEQGDKLIGVLAQYPDTEGGIYDFQSLSDTIHSSGGTFSVATDLLALTLLKAPGEFGADIAFGSAQRLGVPMGYGGPHAAFFACADKYKRKVPGRVVGVSKDRLG…
g105.t1	OJJ76861.1	OJJ76861.1 hypothetical protein ASPBRDRAFT_140226 [Aspergillus brasiliensis CBS 101740]	Aspergillus brasiliensis CBS 101740	99	485	5	0	2	486	3	487	0	956	MSSTDIEKPPSVERIEDIDKLETSTTDVDYDEEFTPAEQRKIIHRVDRRLVTMAGLAYCISLMDRTNLSMAAVAGMTKDLQLGVGTRYSVVILVFFIPYVVFQPPMTVIIRKVGPTLFLGTLVISWGAILVGMGFVKNWKQMVAIRVLLGALEAGYFPGCVYLLSSWYVRYDIQKRYSVFYLIGCVASALAGILAFGLMQMGGIQGISGWRWIFIMEGVITGAIGLLTFVFMVDFPEKAHKSWKFLNERESAFIVRRINRDRADGNGEPFTFKRFFRPALDLKIWGFSLICLCSTTVAYAIAYFLPIILQEGMGFSTGAAQCLVAPPYAFAGIVMYTTAWVSDRYRMRGPIVVFNAVVGIIGLPLMGFAKGNAARYVGVFLVVAGANSNIPAVMAYQAN…
g106.t1	OJJ76862.1	OJJ76862.1 hypothetical protein ASPBRDRAFT_201942 [Aspergillus brasiliensis CBS 101740]	Aspergillus brasiliensis CBS 101740	92.5	626	47	0	1	626	1	626	0	1217	MATPEIWHRQFTRAPGPDVDTLMTGPQQLDLKDRFGQFLKQESHWTLKTLHEILFYYHNLSQASPKACDLSIFMIADGAHIERLTLPNQGGSWFNPHCRIVGVVSFPPSADTIFIVGSDEVHNPERFLQAASWDGKSFHYYAVEDINGNAQDRKWTYQANSSNAFSDDMSYLGPFNGHVNGACIMKELHDPWYHWKTPSHDLTPCLSDAQVELFRTLPYLSPSSWDLLGNVDSAEKLEHDFITKLVSSWFAQHHDNDFMLTQTQYKTNPANLHRWMAHLLLTTTINIATGSHVVAFAADHKKQIPVGPLHMLPFRAPVDLFMNFELLQQDKFGDINRPLTDFSPEFSGENYDKAVEELQLSLLQEWDSESPPSSDMTVKQLPAGTLGGGKQTDSYDIRN…
g107.t1	OJJ76863.1	OJJ76863.1 hypothetical protein ASPBRDRAFT_218858 [Aspergillus brasiliensis CBS 101740]	Aspergillus brasiliensis CBS 101740	94.7	415	22	0	1	415	1	415	4.69e-291	799	MTTLKHHEPPGNLSDLSEENKDLWSQNYISYWMKGEIDADPNVVGKGRTPLTQFFDGTVTPFNQEDQPRVVEWNAFPKLIKSSYPGEPLRWQIADSSRVVQDEYLEWSVSRGPRKYTGDIYSVTFTAEGPEYWQFLASCQKDDFIKLMRDLNSGFASDMNDSDFFLTDAVTKAEVYNPANIWNLLSTTGTIAHLIQPNNTLSAEIDIGAQATVIRKDDEGKVITDADELIRCSKYGNPGRNSDPSIGATINSLARQGAKLTVAEPVALYIRSFDTSSFVFDMNSTSDSSKPDPEDLKPIEKPDEVFQWQRGDIRDQKGLRIKIEVPQKWTDKHGNQLLVSNIYDTRTQRHIKYGAQFADYFTMGISAMGAMGQKADPKPCYNPSSQAESSVKPSCAEFD…
g108.t1	OJJ76864.1	OJJ76864.1 hypothetical protein ASPBRDRAFT_24578 [Aspergillus brasiliensis CBS 101740]	Aspergillus brasiliensis CBS 101740	87.6	437	54	0	4	440	1	437	1.32e-270	749	MQFLPAKRSTPTAKSFRYVDACQTRSSASLGGLKVGRVRVDCCFLMSKTQWGKLRGQDAGLMYLDLTFHQPADCKLSQATITMNFDETSERARRSYNSSDLEITEFFGPQTLTGEKRERQVSKTFEAIPKVGAANASVEGIGISRKSSANYASRWKFTGSRFTEDSDDHAYSTSSNRYRQLIWHLEENELERQAVHHSIVHTALAFHHDSSPFYLDLQIEVKMQRWHHRVRQRLVCPPRDQKALTRAKIKPVVSETDDPHFSKLVRNIDQAMVQENLHPVAEVSDPKPAVFPDDLQGRDPDSELSDISLPNEALFELARQFTGNATKHPSTSAYPRSRSAASTQTVNSSDSTLVESDTVSQPDDQTEIKPVNCEVGVPITVDSPKEIIKTTTIQEHASR…
g109.t1	XP_001400746.1	XP_001400746.1 hypothetical protein ANI_1_1108124 [Aspergillus niger CBS 513.88]	Aspergillus niger;Aspergillus niger CBS 513.88;Aspergillus niger ATCC 13496	71.4	924	261	3	1	924	1	921	0	1251	MTLNITIGPSPHASDVEDSSESGVEVAPPSSTRSHEYHEPTEEWAYLTFPDELKPSDSVNRPQRRGRRSRYREAAPVPFAMSRQDDWLISSGDNDKDITTHLNLDVALDLEDDLGHLAHLNRLGHFRKGIRYFEERLAPHVDFFPVVAEYADLLLEQGNFGGLHQFISSRLLDPLVEYSADEYILLKAMKAFAEIYTRGALIPALNLAKDTLSHLSVGRHLAIGNSLFTGVKIQLMEICVRMIANAAAYSNFLEAESFKSLLYWSAYSDGRVKMRDEDDSVEAYARGASTSRQTHPRIGAWYRFLLQEGFVWDAHRILRSILPMLGSRDGHYVSNGGFEDFFQLGDISKTGNALLQSKEVPLKDEQVLLAEFANACLLVDFFSADHSSQAVHVAYSQLL…
g110.t1	OJJ76866.1	OJJ76866.1 hypothetical protein ASPBRDRAFT_113075 [Aspergillus brasiliensis CBS 101740]	Aspergillus brasiliensis CBS 101740	97.7	349	8	0	25	373	1	349	2.33e-257	709	MSLTLTPILLVLIIFWFQPGLFSIMGEHVLDWLRDKAVGWSHTPPVNKIDTHHHCVPPFYAKAVEEQGGDPSGWPTPSWNPIASKLLMRRVGVKTAVLSVTAPGACIAPDRQARAQLARRMNEYSADLRDKDPDHFAFFVSLPNVLDTEDALAEIAYGLDTLHADGVTLFTRYGPSNTYLGHKDVEPIWAELNRRGCVVFIHPTHPVDTAPVNSKLPQPAIDYPHETTRTAMDMITSGTRLKYPACKVILSHAGGSLPYLISRVTTPMKRAPDVATSYRIGTTHDKAMEAFRSFYFDLALSSSPQVLDMLLKMVPHDHILYGSDFPYAPITAYAAFLEELESYEMGQELRDMINFKNAWRLFPRLAHRTGPAM
g111.t1	GCB19448.1	GCB19448.1 O-methylsterigmatocystin oxidoreductase [Aspergillus awamori]	Aspergillus awamori	95.5	530	24	0	1	530	1	530	0	1052	MSQSVHAQISGIARAYPVSGTLVTIAAGLATIFLVIREIFTPVGKRRPPPGKRWKLPPGPQGIPIFGSLLDVRKIRDDQDHITNNELAKYGEMTTLHLGSKTWILLNSKRVVSEIIAKRGTLTNGRSPMPIASGIVSRNGRSLLLPPSGWTEKRRVMHSLLSGTALKQYASWQELESTQLLAEYLFQPERWYRHHYRYANSVVHRIALGERLVKSGKELEDLQNVVTYFVGSIGSSLIDWFPELDRLPRALQPWRKYWEKLGDWNEQVYKSWWIPVREKVGQGTAPPSWVRDVLLHPDTKFTGDDQEAMYVALQLLEAGSDTTREALNIFVMASLCYPKVFQKAREEVDRWCCTEGSLRLPGIEDLEHMPYICAMIKELLRWRPIFVLTPDHVLTSDME…
g112.t1	OJJ76868.1	OJJ76868.1 hypothetical protein ASPBRDRAFT_190214 [Aspergillus brasiliensis CBS 101740]	Aspergillus brasiliensis CBS 101740	97.5	364	9	0	1	364	1	364	1.05e-268	738	MARNLLKVRFLFTLVLRVLPRASFSISGAIYRAWLKGLPLGSSIWNGFAGALITNTPPDQLQAVLPSTLETYEAWTLSHGVDRTVDVLAADNATRLLWIGSRISKKVLLFFHGGGYVMPLSEAHLDWMTYLRTEAINAGVDMSVCILEYDLIPTKRYPRQMTQGIFALQHLLANGYRPSDIVFGGDSAGGHLSLCLMSHLHHQYPSEQGAKYAIDLPHPVKGCFLVSPLSSFDFSTPSYGRWFSADSLNRKVVDEWGQYLVDDSPWHEEISAGYGWGMALDVPESWWDGFTAVDRILVTGGYEEVFSDHIQLLGEMLKTKCKGSVALHMANGTHDEPLMDFGAKRPPSATTRAIRDFVIACFKD
g113.t1	OJJ76869.1	OJJ76869.1 hypothetical protein ASPBRDRAFT_60555 [Aspergillus brasiliensis CBS 101740]	Aspergillus brasiliensis CBS 101740	96.7	784	25	1	1	784	1	783	0	1517	MPPKVAGDQKRRTGARRKVTLACVSCREKKIRCDGKKPICGPCEKRSYRIDQCLYNPDNARTASRDEYFQTLHHRIRELEDACLLAGVCVDTPMDLRAQRELHSELNRHGEMPVETGSFTMAVSTSLEQPDNRIATTTCLGVGVPPEQPVLARSNLTVGKTTECSPNVGSYGSPMFDDGEAHVTGMGQITAPDAESRRQSSRVQFYGSSSTASLMRFAWQSMPSRPANASSADVTSSTLQDTFTEYRFDDFALPPRTLADHLVRCFFDHVYTLYPFFHRPAFEAAYRNLWLAEDEPKIPLTDSRIGLGSAAESGPRSIAFHAALNCIFALGCQFADIEEVESVANAFFLRSKRFIGLDFLDINTLSIVQTLLITALFLQSSTYPSRCWHCVGVACRVAL…
g114.t1	GCB19445.1	GCB19445.1 uncharacterized monooxygenase Mb0916 [Aspergillus awamori]	Aspergillus awamori	88.1	805	57	2	7	772	6	810	0	1407	MLAKSSEVPSYSQIACVGAGLSAVALGATLKRWYNIDDVHFFERHPTSGGTWYINTYPGCGCDVPSALYSFSFALNPNWTKLMPSNDEIKEYVDNVVDTYNLRRKMTFGTEVVRSLWREDANRWLLYLRERETGREYTHECQILFAATGQLVEPRPCDIPGAADFGGSIFHSARWDHSVDLKGKNVVVIGNGCTAAQIVPALVNEGKIKSLTQIVRTKHWIFPAPNFTYPRVLQWIFRYIPFAMRLHRFHIFLMAENDFRLFPMTKGAARLREKRRMQVEKYMRETGPAKYHDLLIPDFDVGCKRRIFNPGYLESLHSDKVLLTDAKIGRITAQGLETDKGFISADVIVLATGFRTNKFIPFMDVVGRNGESVSQHWTKYDGPAAYNCSVLSGFPNFFM…
g115.t1	OJJ76875.1	OJJ76875.1 hypothetical protein ASPBRDRAFT_201952 [Aspergillus brasiliensis CBS 101740]	Aspergillus brasiliensis CBS 101740	98.2	712	12	1	1	712	1	711	0	1323	MDPIQSNGHQARRIRQNPVSCRLCRQKKLKCNRQQPCSNCSARGVGCEYFARTLGSTSTDRTDRRQALPAAAESARFQARLERLEEAVFGKQDGGHTVPPATTVLPSFAFNEEHEVTSRLLEGIGTFENPILRASVVSIPSRVGPIRQLLENVSATRNEAAPWLPSVQLPTKDEAMNLSQYFLDNVQYLHPVFEPHSLHHVIDAVYTHPNTPGQSKVADIALLLSILASASHLWRPQRSNCLVFSSEKEAASMSLIWRNAALDILEFSKRTTAASMEDLQATIVISYVIYNSEGFSPMFRSLHSNMIMMARDLSLHKTDSPRRKGETDPPPSQIEVDVKRRIWWHIAATDWLLAFTPGPQEGTYSIQLSQMHVNQPHYPESRDNDAGDVLSLSTSYFLQ…
g116.t1	OJJ76876.1	OJJ76876.1 hypothetical protein ASPBRDRAFT_60561 [Aspergillus brasiliensis CBS 101740]	Aspergillus brasiliensis CBS 101740	94.7	590	31	0	1	590	1	590	0	1141	MYTDIVRASSDAIDALTLYRRLILSEDAFVDNAGFAAFDAHVGDTACQLRAGMLLDLTKKHRHWALRSNVKEPSWLDTYIERLTNVRDGAREMLAKLTIERIHPEKLGIGPKKDTPDGLLRHLGWDEEEILSSISVMYPISPAEKPCTHDGCLTGWDLIEEKREREQLATKCQEDNALWQICNDPAVLLDSSVSLHEDKNLVIVDDIDVKQSTERIPPSCASTASSSSNDAVDGIEWNPRDAWTIVRFLTYCFVLSKYKSFRRFQHVVGARIDLDAAIRAGDEMVCDVWDYSLCNYKYSKSTRRIELEIGLLQSWLSKLSCAWLYDIAKTSSASPGIDSLMMRTIRTSSTNLTCIPTYVGYLAMRELWGKDGDSLILVDRHFCDSGYHYNFFFATLRLE…
g117.t1	OJJ76877.1	OJJ76877.1 hypothetical protein ASPBRDRAFT_201954 [Aspergillus brasiliensis CBS 101740]	Aspergillus brasiliensis CBS 101740	96.6	379	13	0	15	393	10	388	1.14e-266	735	MWATAADNSPISTSLLGQCLGLQGGQKWAVMRAHFEPEFSHLASVHMADTFAAEIEKWALELSKGHGLHQHEATMGSLHRNPTEACRYLPFRLTALTVYGDALDAETYKALVGLNDLHEQVMLDAFFGRFTVSGIFNIFPTQSRRRLDRFKATWEKLNLDVVAKSRRNRLHCPAERIYKGVESGKMSKLEFLQTMDELLFTNIDVTSTVIAFLLINIAANPSFQSSLREEIAAKQSQSSYKLIDYVLEKDTLLHYAAMESIRMSPALWFSLPEKTATEKIIGGYRIPAQTSTVIDWKRLNTTPAIWGSDGERFRPERFADISPTAYRYGLLRFGIGRGRCLGKNIADIMLKMVTVAIVQRYSMAPAGEERGTRQDRFTVTSEKEIEFTPICSL
g118.t1	OJJ76878.1	OJJ76878.1 hypothetical protein ASPBRDRAFT_49895 [Aspergillus brasiliensis CBS 101740]	Aspergillus brasiliensis CBS 101740	97.8	415	9	0	1	415	24	438	2.29e-267	740	MGAFFTFFCSVGFINAFGVFQDYYESHQLRSYSSFDISWIGSFSTFALFSGAPITGVLVDRVGPTVLLISGSLAMLVAVFMTSLCQQYYQFFLAQAVLLGASMSLLFCPAIATVSRYFHKNKGLAMGVTVGGSSTGGVIWPIVLNELLNKDGVSFGWTIRIVGFIMLPLLVLAVLTVTPPAKKANDDHHHHILTEEEGKRRHEGDGSQETLQEDSNAHKQGLVSLLKNTTFLVLCSGLSISYLGMFSPFFYATSYAQSLGHPTSFSFYLVSIINAASLFGRVLPGILADHYGHFNLCGTAALLSGVTALCWTAAKSTGGLVVWCLAYGLTSGAIMSLQSACAAHLAPHELHGTAVGFLMGSVALTALFGTPISGQLVGSYGYLALSMYAGASLVVGGLL…
g119.t1	OJJ76879.1	OJJ76879.1 hypothetical protein ASPBRDRAFT_24594 [Aspergillus brasiliensis CBS 101740]	Aspergillus brasiliensis CBS 101740	93.3	371	23	1	1	369	110	480	6.95e-237	662	MDFTTLLRSSEDFMYGVGLPSVDDHIMRTHIGPSKDEEIFFHTDPLANDFDIPSLPSTVVSAYRSPLLAQGSFEPQGATNERTTSSQFLSASVLVSEIYERTVSLECDPRIPSLSGAEERSDRYSVGPVLELTRRLAAELRHSWRPKLSVQDIHQFRPSTSTYPVSPESMDIFSVQQASSEVFDSKSIPTEMPDLATTMLMLTGYASLTKLYMVVFSQIHNALKQLPGSASSHHAPSHGLGESEHLRPGELLAPTSTFEGCSRIYITVQMLLDEFQAVEHIVSFDPLHDHDTSPREKQNNSLEEARQQKLLGADLNSHEGWLTRQLEMVRAGLKKDMIRILGNGSQRELSSILQHGHYLKVLLRERMGL
g120.t1	OJJ76880.1	OJJ76880.1 hypothetical protein ASPBRDRAFT_165333 [Aspergillus brasiliensis CBS 101740]	Aspergillus brasiliensis CBS 101740	96.6	936	19	2	1	933	1	926	0	1790	MSFANLTVFLESVAGQGNGQQIICYPLHNTEQPQSFSCQELLEAAQRASWALRSRQEEFYPGRVVLIHFDTHWDNIVWFWAVVLTGCIPAMSTTLSNDPAARVSHLEHLATTLKQPGCLTTAAKLFEFGGQDRITPLAVESLDVEKAPAAELRNVYRDAAPSDIAILMLTSGSTSHCKAVVLTHRQVFTALATKYKVVPLPEKTSFLNWVRCDHVAALVEIHLQALFARKDQVHVQASDLLSNPLAFLDIIHRHRVSRTFAPNFFLARIRSALEGHGDACAAAHQWDLSCLTYLASGGEANVTKTGAAVAKLFARYGAPATVIAPGFGMTETCGGAIYNLEFPRYDTERGLEFASAGKCISGLHMRITTNTDHAIPPAGTVGNLELSGEILFEGYFNNP…
g121.t1	OJJ76881.1	OJJ76881.1 hypothetical protein ASPBRDRAFT_201956 [Aspergillus brasiliensis CBS 101740]	Aspergillus brasiliensis CBS 101740	98.6	435	6	0	1	435	1	435	0	883	MYDLQKVIIIGAGPAGLAAAIRLAQHNKLNPVIYELRDPDAAGIGGSLGIPANGLRVLHRLGLWDMMVRHGVEISKTILHSASGSILREVDVATEPKQKTGFGYFRINRVDLVQCLRDAAQARHIPIHYGKQLTSIDEHGGDRVTVTFSDGTSDTASLLLGCDGIHSTVRRLYVDPEMKPVYSGFGAISAIVDDVHSQERQDATCLHSTITPQGMVATAPCAADQTFWFFSKEVPLPPATDSGDERDGWSLYRQNELAEWRSSLSSVLDCMEGQWGQYMRQLVDSSKDLHFYPHYRLPLGGRWFVPSGTGRGSPPRTLLLGDAAHAVQPHAGQGVALAVEDVLLLSGLLTQYQAGKYMALEEVFGQFDRIRRPRIEQINELASRNGRMRRNQSPWLVWF…
g122.t1	OJJ76882.1	OJJ76882.1 hypothetical protein ASPBRDRAFT_49898 [Aspergillus brasiliensis CBS 101740]	Aspergillus brasiliensis CBS 101740	96.1	306	12	0	1	306	1	306	5.52e-203	567	MGLAMASNLQKHLFAEGQSPLRFWNRTASKGDALKSLGGIQCDSIAAVVRDSVIIFISTSNDEAAQAIIAQIISAGNLTDKVIVDTTTVHPKTSAAISAELSHRNAFFVSAPVFGSAPMAADRMILAVVAGPHCAIECISPYVKDVIARDMLQVAEQPEKASLLKIIGNFLVSGLTEMIGEAHVFAEKSEVGCGVLEKLLEVQFGRLPFMISQRLTKGIYMPPKGTSPWSNLDLALKDVGHAMDCAASSGSNLRIGEIALDHLRRAKAYSEEQGRDLDSAASYGILRRDADLDFANEAIKRRDTPN
g123.t1	OJJ76883.1	OJJ76883.1 hypothetical protein ASPBRDRAFT_140247 [Aspergillus brasiliensis CBS 101740]	Aspergillus brasiliensis CBS 101740	91.6	440	12	3	1	438	1	417	2.83e-281	775	MDLTRLAASISEAARLLSSDAETSPQQRAELLRACENLAASIEPPGSKLEKASVGMTPIVAVRIAIDLGIFDLVHSTPKNEFTNDDFISHTGADPLLVCMETPNIFGIVTCATILIGTKQPGRILRSLVATGIFTVTQTGTFRPDPVVKDLAPGGYLASRIIMNFDLHFQIFGKLPQYLRETRYKSPEDAYAGPFQYVFHTDEHFFDWIKSRPVELDAFNRTMQAGVVRDNAARWTDIFPVAQRLQRFLRADLPPTERFQMVDIGGGIGHETKILLDTLPGLAGHFILQDIPSVVESLLPELRTTPGSQQRVVQAMPYNFFDPQPVTRAHVYFLGRVLHDWPDTQARSILQHVRNAMGEDSLLLIHERVLPDGPSKVHPSDAIMDFNMMALCSSLERTE…
g124.t1	KJK64176.1	KJK64176.1 FAD binding domain protein [Aspergillus parasiticus SU-1]	Aspergillus parasiticus SU-1	92.8	498	35	1	1	498	1	497	0	945	MSIPDECTVLVVGGGPGGSYAASVLAREGISTVLLEADQFPRYHIGESLLPSTREFLKFIDVYDKFEAHGFKHKNGASFSYNSKPPAYTNFLAFGGHAWNVVRSECDQILFEHARESGAQVFDGVKVNAIEFKPIGCQEPHGSEINLGQPVSASWERKDKTASGTIRFKYLVDASGRAGLISTKYMKNRRYNQGLKNIATWGYFEGAQTYGSGTPAEGGPFFPRLQDGTGWAWFIPLHNNTTSIGVVMEQTSFTAKKKQMESPTTRDFFLKHVHDAPGISDLLQTATLVSDVKSATDWSYSASRYASPYLRIVGDAGCFIDPLFSSGVHLALTGALAAAASICAAIKGDCSEQEAVNWHSVKIREAYTRFLLVVTSAYAQIRGQERPVLNELDEANFDR…
g125.t1	OJJ76885.1	OJJ76885.1 hypothetical protein ASPBRDRAFT_219125 [Aspergillus brasiliensis CBS 101740]	Aspergillus brasiliensis CBS 101740	94.8	324	17	0	1	324	135	458	1.84e-228	640	MSKALAWSRTRTRSTDHYFPSFIEELEYSFAQEVDNKIHTHDGWNEFDCFTISRRLIMGLVAKLLIGNECRNPATIDLFCDYTAEMLVGGPYIRGFPDFLKPIIARSSRVAKLSNQMQKLFLDLINKREDKSKQTAKEDQQPEDLTSWFWSWSQQELNSSLTDLDIAQLLAANTFGASFNTTVVLVQCLCELATRPEYIGPLRDEITSTFRTYDNTWTKDGIDSMKKLDSFIKETHRYNCFDYAGTPRVVKKDFAFKNGLRIPKGTVVFTPNAPMLFDQEYIQDPHVFDGFRFYDLACGSKTPEAFRYTSTNSRYLQFGDGKHVW
g126.t1	OJJ76886.1	OJJ76886.1 hypothetical protein ASPBRDRAFT_24601 [Aspergillus brasiliensis CBS 101740]	Aspergillus brasiliensis CBS 101740	94.4	392	18	1	1	388	1	392	5.88e-254	703	MTPLWIGLVSFANMFSVGTFYALSVLQIQLPRLVGTSDAWSFAPFGVVCLGLTVGVATCASMIAQRGAYVTAASGTTLWGFAVIGAGVSLTRLRFESMLLCFLCGGVGVGWTYLAVVVMVGQGFPHLPLARSAIGPISFSSGAATCFYLSCALQLSAVDADRVGQALTLAGGAFVAVGGATQLLMPGATHNGQCNSPKTSLSRSERFFSILLFFNALPGMTVFGAFAPLASYYADGKRGDDSMTLLLPYSMLALASGGVLAPTISAYLGARHAFVALLCLRGTFLVLLSQLEEESMLGLGAVLTILFAHGAGFSILPGLVKAQSTPPGLFLRSYGRVLVTWGVAGIVGCTLHTALSSISAAALVLGLLTSAFGILLHIMPSLGGEFLA
g127.t1	OJJ76887.1	OJJ76887.1 hypothetical protein ASPBRDRAFT_190233 [Aspergillus brasiliensis CBS 101740]	Aspergillus brasiliensis CBS 101740	96.7	361	8	3	1	361	1	357	1.24e-247	684	MASSTRVAACHVAPHFLSARKTVDKAISLVHQAARNSANLVVFPESYLSAFPIWSALRPPTENHDFFHRMVQESLYADGEEVRMLQESARETKTVISIGFSEKSSESTACLYNSNLIINPAGEVVVHHRKLMPTFFEKLTWSPGDGYGLRVANTPYGRIGGLICGENTNPLARYSLMAQCEQIHISSWPSIWPTRVPTPPPPEDRRPSSLSSSPNYDNVLANRLRAAAHCFEAKCFGVMCSGFLNQEAIDAVVVSGSTSSSPDIIRGALENSPRGVTMFLDPTGTPLPSFTVDEETKVMQATEFLQHEEGILYADMDLQRCIEGKQYHDVVGGYQRLDVFQLQVNRSRKSPVVFTESSDIQE
g128.t1	OJJ76888.1	OJJ76888.1 hypothetical protein ASPBRDRAFT_113801 [Aspergillus brasiliensis CBS 101740]	Aspergillus brasiliensis CBS 101740	98.2	503	9	0	1	503	1	503	0	980	MPAVRDTSNHPVPVRGWWSSPSLIRLNLCIISLTLLSSANGYDSSLLNGLQSLPIWMSFMGQPGGTWLGFINTLYWIGAGTSATFAASFSNRYGRKKAIWLGYSCLIVGTALQSAAPSKALFMVGRFLAGASMGWMNNAGPSLIAEVAYPSHQGVATAMYMTSYYYGSVVAAWVTFGTRTLESNWAWRIPSLFQLLMPLLALPGFWFVPESVRWMVSVGRVAEARETLVRTHADNDSGAPWVEEELQMIQSSIVAEMEAEQSSGYAEMIRTPGNRHRLLISVTLGFFDQWVGNGLLSYYLTIVLNTVGVTETKDQLLISACLQIWNIFFAIGGAVSVERMGRRKLFLLSAAIMLISYVVMTGLYGSFVTTGSHSTGLAFVPFVFIYFAGYDIALTPLLT…
g129.t1	OJJ76889.1	OJJ76889.1 hypothetical protein ASPBRDRAFT_201963 [Aspergillus brasiliensis CBS 101740]	Aspergillus brasiliensis CBS 101740	96.7	847	26	2	1	846	29	874	0	1635	MWETFDLPRLGIQSLKTTDGPAGVRGARWTDGSYTTFIPCGISLAATFDPQLVQRIGTVLGAETRGKKAHILLAPTMNLSRSPLGGRNFENFGEDPFLTGVMATHYIQGIQSQGVGACMKHFVANDQETRRFNVDEQIDERTLREVYLKPFYMALKADPWAAMTSYPKINGEHADTSRHLVYEILRKEWGFENLVMSDWGGLNSTVGSIKATTDLEMPGPPLRYGPALEAAAKAGEVSETDNIDPSVRRLLRTLHRAGLLPSDEGDVANVSATNVLHASNGIHATNGTDVQADEEALDTPEFRAIAREAAASGIVLLKNNNQLLPLQPANPRKIAIIGPNAKTPTAGGTGSAIVNPYYITTPYESIVEAARKVNPDVDITYEQGILTHLHLPLLGNILK…
g130.t1	OJJ76890.1	OJJ76890.1 hypothetical protein ASPBRDRAFT_24605 [Aspergillus brasiliensis CBS 101740]	Aspergillus brasiliensis CBS 101740	79	620	9	2	1	499	1	620	0	912	MNDTDVRSNTRKRAAVACEYCRKRKRRCDGRQPLCSLCQQSNRTICHYVVNLPTQAEGETGTDATTTGPDSSLANRLARLEAATEEHSASMDAMKKQLRELITTANVSCTDDVLSYTLATTVQMTNPSPRGQTSTRIHDSVPMTIPLGHGSTSEDLLRARKVKLLLGGHPKNMFLKTEQKRGQPEEFTLRLDRTWATASGASLEETAAADLVNVYFAEVNPRSEGQEASVSQDLMRLCWAIFLVECDILAEYHLPRSGIENVMERLPYPECGPQSLDQHLLSWLGNLSARKLMNRVHFTIYNTTRSGSNDDVEHILDRLLDSPNANVLFATSAELNHQLNMWWDLLPMSIKPNLGDSDLGANKGDLLLRFWACGDIIFRPFLYKACSMPQGSVPEEVLL…
g131.t1	OJJ76891.1	OJJ76891.1 hypothetical protein ASPBRDRAFT_36069 [Aspergillus brasiliensis CBS 101740]	Aspergillus brasiliensis CBS 101740	91.9	369	12	1	1	369	1	351	3.90e-244	676	MASPTFKQFYLPEKKGFDSLALREVPKLSAKQGQLLVRIKAVSLNWRDGIIALGTYPFPGPDALVPGSDGAGTLYLFLMYDIPHTKHIIGIVEEVGEGVTEWKIGDRVLANFTQDHIAGKLNKQSLLSQLGGEIQGLLGEYFIFPKLGVVKIPDYLSFEEASCLPCAALTAWNALYGLVPIRPGQTVLLQGTGGVSTFGLQIAHAAGATTIVTSSSDEKLVKAKELGATHLINYRKNPDWTAEVKRLTEGNGVDHIIEVGGTLTLQQSFDSIALHGLIHCIGHITNPDPLGAGKELRGPDAAFLALDRVCIVRGVVVGSREQLLDMLECFEAHSIRPVIDRVFDFSQTRQAYDYLWSSNHTGKVVIQVS
g132.t1	OJJ76892.1	OJJ76892.1 hypothetical protein ASPBRDRAFT_190238 [Aspergillus brasiliensis CBS 101740]	Aspergillus brasiliensis CBS 101740	95.7	584	25	0	1	584	1	584	0	1135	MSQPSAATRRHRRGAACDECRRRKLRCDGQKPQCGRCLDMGVACELTQRSARGPKKGHLRDLKNRLVYLEALLENSVPTEDTQQDLHAVTEYTGDPSLLPLMRAGHTADVGTSEPWISTGTVTSNSEHERLLQPELTPGVPSFSQRSSVGPIISGHSTPIQRITSLVQEELDQLYLDRVHNSIPILHQRRYMSWSKSSTKTAPRRCLQYAMWTLAALLSTQFRDMIEPLYQETKRMLDQCTVGANEDSNIDTAIGQTWVLLVVFESMRTYHRQARMSAGSAFRFVQAMHYHEIDSLDNGKRGSAYAQRDDDFIEVEERRRVFWMAYFLDHIISMRGDWPITLHEHVICTRLPASDSKFQNGYQELGPFLSEAMTDSTLQVRSSFTECLILVTICGRSLL…
g133.t1	OJJ76893.1	OJJ76893.1 hypothetical protein ASPBRDRAFT_653976 [Aspergillus brasiliensis CBS 101740]	Aspergillus brasiliensis CBS 101740	96.4	276	10	0	1	276	1	276	9.51e-189	528	MSLSMRANDAFNVNPVAGVNEALSVHGSDWLCAVTAIYIVSFLCLLTMSFTGKESERVFHYLFTFLLLVGAITYYAQASDLGWSAVEQVNNLDNGVIRQITWAKYVNWVIAFPSLALALGLVSGVSWTTMICNIAIACYWVTSYLVSAYTPSTYKWGFFAFGTLSWVILAMSTINESREAAKRLGVDRDYMILSGWCNLLWLLYPVAWGLSDGGNVLGITEAAIFFGVLDILMVPGLTFMFLFFARNWDYRKLSIAFSDARPSREAQSSMQQVAES
g134.t1	MCJ1304031.1	MCJ1304031.1 hypothetical protein [Hypocenomyce scalaris]	N/A	47.8	609	305	5	52	657	40	638	2.79e-183	547	MGHSGISLKRRDHADPSSPPSISKRQRPDLAEVTPNIADSESEDEKGTPTDGMHDEVKDLYQRKDKDGDETWVEECPEDIQGPVECAETMRYALLVLHKKSSDTRKKLDIVAITVQSPLLKRVLGRVFDGYPKIATDLARLNFEAPFQPFVHRWDGFVRAVSPEKHPQTKSHLDLLYKVMEPELRIVVAEYRDLVKHSIITYEHLWTIFEPGTTIIWIDHGHLRMSKLAAAKYTKTLYGVPVFRLQGLYVDYDGDMFGGSREILDINMFDGTKPITSLEVYPLQYHPAHTKLATRLASRGKLLEGLAGYQYSSYRGVGLKYDRRGNLVEEHVDGRIVVDTKAFNTFNPIHAISLQPLPEQAKQLSVTAADYTNIAFASLFTEQNNVHHHSPTSTHLQGA…
g135.t1	OJJ76896.1	OJJ76896.1 hypothetical protein ASPBRDRAFT_190242 [Aspergillus brasiliensis CBS 101740]	Aspergillus brasiliensis CBS 101740	96.5	516	18	0	1	516	1	516	0	1013	MPSLASLTAIAMLIPLAVSNQSSNPNVTSTLKISPAATPLPGKQIVDAAYQSFSIEFSFMADYAGNDTHPNLFSRQVIQNLYDISGAYPIFRVGGSTQSSAIYYPNQTEAIIDPFDSVASDQPSHTFVGPSWFQSFRQFPNGTQYIYGLNFFNTVNETYYNIGNGLDQCVLEANVAYETMGNSLYAYEIGNEVDGWGNGKHREGNWTVQRYVNQWNEFATAISRNLTGKDAARLFQGCAFEAPRHISERTDWNVENAELDGMGPDKARTVSDHEYMGANCDYTGAGPTIADTLFDRTNMLSRVWYHDYLGNATANSGIKYVIGETNSISCQGAFNISDVMASAVWAVDYVMYLSSLKVSRVHFHMGTRYRYSPWQPIFYNDSAPHVNPMYYGNLFNAAV…
g136.t1	OJJ76897.1	OJJ76897.1 hypothetical protein ASPBRDRAFT_70463 [Aspergillus brasiliensis CBS 101740]	Aspergillus brasiliensis CBS 101740	95.5	449	20	0	1	449	1	449	3.44e-308	845	MLNSALDSRIFRNLFGTEEIRDIFSDEAYIKCLVEVEIALARAEAKVNVIPQESADAIAENAKYENLDLNRMAADTENVGYPVLPLVWQLAEMVPQEHAKYIHWGATTQDIMDCASMVQMRRGLVVVRRNLHELNATLTTLSRKYADTPMAGRTHLQHALPITFGYKCAVYISSIQRHIQRLTGIERRCLLVQFGGAAGTLASLGSDDTGLKVRKQLAMELELHDPSITWHVARDDIAEIINFLALVGGSLGKIALDIIMMSSNEVAEVSEPFVPFRGASSTMPQKRNPISSEVILASSKLLRSNASLALDAMVSDFERASGPWHLEWSCVPDSFVLCSGALHQANFIMKGLLVNTDAMSRNLDMTKGLIVAEAVMMGTASKLGRQRAHDAVYEACTKA…
g137.t1	OJJ76898.1	OJJ76898.1 hypothetical protein ASPBRDRAFT_112926 [Aspergillus brasiliensis CBS 101740]	Aspergillus brasiliensis CBS 101740	96.9	521	12	1	3	519	1	521	0	988	MSMELHGRALSLAQLILVVCPAFFLFGYNQAGVGGLVSVENWTKTFPEIDTIHTLGAVKSHNLTVQGVVISTFTLGALVGSLSCSLIGNALGRRKVIFAGSLATWIGEALCCSSFGLAQLIVGRLIIGAGVGMLSGTVPVWQSECSSAHNRGKHVVLDGVFISAGYAVTSWINLGFYQIKSGSVAWRVPLAIPGLVSLIPMLSIFFLPESPRWLVQKGRLEQARATLASLNNASAQSDDVDGNIAAIQSTLENHSGGVSIMDIWRHNDEKLIYRFSLCILLQFYQQIPPLTQLLIGNLISVYAPIIFEENLQMSSMMSRVLAAATLSWKFLSCFVAFYCIDRFGRRMVFILSGTGMSLCMLALAITTSFPPTNKPASIMSTLFIFLFNFFIPIGFLGAN…
g138.t1	OJJ76899.1	OJJ76899.1 hypothetical protein ASPBRDRAFT_140273 [Aspergillus brasiliensis CBS 101740]	Aspergillus brasiliensis CBS 101740	90.3	321	31	0	1	321	390	710	1.13e-182	531	MIQDDDVDTDLPIDTDLDDATATDIPLPLPGETTSMATFILYVRLLRIFSSCLKSLYTTTKRRNGVAKITALDHELSVWRHSVVQFQGSEMKEHDDGLPDTLHMNSPDKPFETLFLHFLGNVAVVLIHQPALTFDPTHPQFIKSLSRCVRAALNILGLLGSSHDNRRLHCLLPNKSSVVFQSTLLCFYHQWMCMSFSLTPSHDLNPLMGNVVDTALKLLDMHKAELVAPDAGSNTSIDIQTISAAEDLVRLFSSRMNQSRHASTSLQASSITQKPTSSLPILPPDDQGSHEPANLEQESPMETIPLDFGILDDGILDFDWP
g139.t1	OJJ76900.1	OJJ76900.1 hypothetical protein ASPBRDRAFT_36075 [Aspergillus brasiliensis CBS 101740]	Aspergillus brasiliensis CBS 101740	98.1	156	2	1	1	155	10	165	8.82e-107	311	MLLNPFRPCSGSPTFQEEYRNSNYIPEVIETELGRQIVAPDTPYVAAAGPNALYFIDTRFDPETAQHIKLQIEKASVPQPDEYIAIDEIEVTAEVKNRTTGETTFVFDPVYVRVLFARGINRHNPDIKLPEYGPAGDWLVTYDLDDILARSGTKG
g140.t1	OJJ76901.1	OJJ76901.1 hypothetical protein ASPBRDRAFT_36076 [Aspergillus brasiliensis CBS 101740]	Aspergillus brasiliensis CBS 101740	93	286	18	1	1	286	1	284	3.60e-193	540	MPDIRGATLTPSTSKVDYLEALKEAVGTRGLKTLPPESVDSPELQEFRRSLAKSTATAPGRYTCSTEKPVPVTIRGINNRATLQGGFKGVIPRWKPDSPPQPINFAAFANGYPRPGLALLAANALRDAADDWNKLDLGVKFQWVEDIKQASFVLSYAGSQGSVLAEAFFPNEDDLSYLNVYSSAFEPGTVQYLKNIFLHELGHVLGFRHEFAPELEDSNDDYSVQFGPRNPMSVMGYEFPPLLQTTDRDSAQAFYKFPGSQLGWKEARIPQGKGRHMLAIKDCTAR
g141.t1	OJI89769.1	OJI89769.1 hypothetical protein ASPTUDRAFT_195290 [Aspergillus tubingensis CBS 134.48]	Aspergillus tubingensis CBS 134.48	87.7	514	63	0	1	514	1	514	0	967	MPKTRRLLHQEITYSDAQDDQSNILHKLTFPSQRDQFLDHVYRHCSWIQRVVSHHLNFRSGDTCRVSQPEEWLHGSFNLCIPVEVVQHAQSATTKVLVRIPLPYRVGEAFRPGNADEKLRCEAGTYAWLQLMAPSIRVPRLYGFGLSTGQCFTDIENMPFLTRCFHHLRCRLQACFGYQTPTRYVPHPIHRSDDPGMGYLLMEFIDDAQMLSNTWSKSHGDERLRKNLFRDLSTIYLTLAQVPLPRIGSFVIDANGYLTLSNRPLSSEIQELENGNIPIDMPRDFTYSTVDSYVVDLLSCHDSRMQHQPNAVMDLKDGIYQITALTMMKTIFPHFFRRELRRGPFVMQLTDLHPSNVFVDDDWNIKCVIDLEWTCSRPIEMLHPPTWLTDQTADNLDLE…
g142.t1	OJI89768.1	OJI89768.1 hypothetical protein ASPTUDRAFT_917866 [Aspergillus tubingensis CBS 134.48]	Aspergillus tubingensis CBS 134.48	81.9	72	12	1	1	72	63	133	5.04e-23	95.5	MSDQRPSRSKQNPEEYVGEATVGIRADVKTIKQLTSSSEAAKARRMASAVAALDKAAQAAMEEQPTGSGDQNNS
g143.t1	OJJ76902.1	OJJ76902.1 hypothetical protein ASPBRDRAFT_115015 [Aspergillus brasiliensis CBS 101740]	Aspergillus brasiliensis CBS 101740	98.1	580	11	0	1	580	1	580	0	1008	MSLVQHVSVIEGIDREPEPQDDSTIATAVTGEPFAPIHRKISYDILQPPPAPVETAGTPAYKVSTAKRLAQVIVTILACWFAAGVVFGFAALKPVLVAEGVYRDLCTEDELREGVEVCSEQDLRLNLFFTIGSITANVSALPVGTILDRYGSRICGFAGCLLLALGSLLMAYSFSQPQFDGYVAGNFFLALGGTFIFVPSFQIANAFPMYAGTIVALVTGAFDASAAVYLFYRLVYEMTHGSFDPGKFFLGYTIVPGFILVALITLMPSQDYQGTHALEVKIEKAEDATRDIHDSDDDIESDTELRRVRSERAERRRKKMRKIAKVLGDKGERQEREQREEDRHAASAVWGALHGQPAHKQMATPWFILITLMTVLQMLRMNYFIATIRAQYAYMLDSD…
g144.t1	OJJ76903.1	OJJ76903.1 hypothetical protein ASPBRDRAFT_70467 [Aspergillus brasiliensis CBS 101740]	Aspergillus brasiliensis CBS 101740	99.8	503	1	0	1	503	1	503	0	969	MASISINAPGATGFIYNNANLGTARVCISAETPDFDTETLRAWADEGFDVVYAPYNNGGKEYEARLKSVKEGLGVGDNYAVIAFGDAASYCLDYYLKSTNCSRLAALIAYYPTTIPDTRSRFPFSVRVLTHLAGDTVDVVTIPTVIGLQGKRHRSTKQINPGIGTGERLQIGWPAFTYESVQPGFAEHDLEEYDRLASDLAFSRTLQVLRKAFGKDLDLENRWEEHLEARFFSMNLSSTMEPYVGHLHPTVTFTPTMSGAIGTHALRRFYEQNFLRKLPPSMRLRLISRTVGADRIVDELYASFEHTQEIPWMLPGVPPTNRRVEIVLVSIVSLRAGRLYSEHVYWDQASVLVQVGLLDPKLVPEGAPQGVDRLPVIGREAARRIVEEDPEAEGRDYHN…
g145.t1	OJJ76904.1	OJJ76904.1 hypothetical protein ASPBRDRAFT_190250 [Aspergillus brasiliensis CBS 101740]	Aspergillus brasiliensis CBS 101740	98.1	413	8	0	1	413	1	413	5.95e-293	803	MDFSLQSHASFIGRPASDLPTPSLILSKPVLERNINRLQQDVQELGLSFRPHVKTLKSLEITRLMLSNGLHRGLIVSTLSELRGVLPLAEEGILNEALYGLPIYPSALPHLHSIRQSHPSLTLLLMVDSLQHIPIIESFNNSIPEGIPPWPVFIKLDVGSRRAGVDVYSPDSGSELEELVQAVEASTAVELYGFYCHAGHSYSTKGEEEAGRVLGSEVYGVLRGVKLIARGEEEKRRRIVLSIGSTPTAHVVRQVKKYLTEEGNVNSGVDVEVEVHAGNYPTNDLQQLSTDLITPADLAVRVLAEVCSVYPRRNEALINAGTVALSKETSAVPGFGRLVEKPEWGVVRMSQEHGIVGLLSGDGAGKVEDVFRVGQKVMLHCQHACITAAQHFVYYVVDE…
g146.t1	OJJ76905.1	OJJ76905.1 hypothetical protein ASPBRDRAFT_36081 [Aspergillus brasiliensis CBS 101740]	Aspergillus brasiliensis CBS 101740	99.2	478	4	0	3	480	4	481	0	972	MATKITAEDLPNLLANDIKVKVAGVDCDGILRGKVMSKEKFLGIAQKGFGFSSAVFGWDMQDVLYTTDANIAPADSGYVDFLAVPDLNSFRRIPWEDDIPFFLVRFVQNDKPVSADGRSMLRSICDKLAANNCKGMAGVELEFMNFQTPSEDGYGANGSQTRDIAAFLDKNAPGALRPLTAGSFSYSATRPVAYKKYFYDIFDTSARFDCGIEGWHTEGGPGVYEAALKVCDVSDMADKVSLFKLLAKSIGVEHGITPCFMAKPMQGQPGSSGHIHVSLTDLEGKNLFARDTPDPNAPWSDAANLSDLGRHFLAGVLEALPDIMPLFAPTINSYKRLVENFWAPVNISWGLEDRMASVRIITPPVCKPGATRFEVRIPGADLHPHYALSVILAAGWRGV…
g147.t1	GAQ42975.1	GAQ42975.1 aldehyde dehydrogenase family protein [Aspergillus niger]	Aspergillus niger	88.7	752	34	1	1	701	1	752	0	1325	MSQSLRIAILECDTPIDPIKTKYGPYGSIFESHLKEGLGRINANVSLQLTKINVVQPFAEYPKPEDFDAVLLTGSKHDSYKDEPWILTLTRFVQDCYLIHHKPVIGICFGHQIIARALGARVGPNVSGWEVAVESVDLTSAGRRLLGKDTLAIHMMHRDIVYEVPPGCVNLGATLICGIQGLYAPKRILCVQGHPEYNEFMVSELLKLRRGMLGEAVYEDGMARTHTTTIYLLYTMSNAIRTLSPSTNKVIFEHPGLSLEEARKVAQASQDAFRTYKQTTLAQRKAIVLKALDLIAANKDTLAEELTTQMGRPIAFSAKEIETFRKRGDHLLSIAEESLKSLPGTPENGFRRFLKKEPVGPTLIITAWNFPYLVTINALVPALLAGNTVLLRPSPQTPI…
g148.t1	OJJ76908.1	OJJ76908.1 hypothetical protein ASPBRDRAFT_49920 [Aspergillus brasiliensis CBS 101740]	Aspergillus brasiliensis CBS 101740	99.6	277	1	0	1	277	1	277	3.48e-196	547	MVGRLAGKNAVVTGAAGGIGLETTILMLREGASVLMTDISGPGLEKALNKVNEVVPQRDGKVETRVVDVSKEADVEAAVAHLDAWGGLDVIFNNAGIMHAKDGDSEETPEAIWDLTMNINVKGVWYGCKHAVKSLRKHGKKKGSVINTASMVALVGAATPQLAYTASKGAVLALTRELAIVHAREGFRFNSLCPAPLNTPLLQDWLGDDKEKRFRREVHFPTGRFGEAIEQAHAVVFLASDESSFVNATDFVVDGGLTKAYVTPEGPATEAPKNLGQ
g149.t1	OJJ76909.1	OJJ76909.1 hypothetical protein ASPBRDRAFT_113671 [Aspergillus brasiliensis CBS 101740]	Aspergillus brasiliensis CBS 101740	96.9	546	17	0	1	546	1	546	0	1053	MPPSRRPRADPIVRVRTGCWSCRRRKKKCDEAKPVCGGCVRNKLTCRWPTIIPGQPKANNISLMPEEGDQENQPGGQEGPSRQMNTIREMSSSIESRSTSPSSPEEILRESDYPEDTSRESPASGPLTSMELAQVPAIGNSQVPGASATVSNLLPRSLSMFPGHGPDSYQLLSHYLATTADCMANGSTPINPFLVQIVPLAFSSDLLLQLVLTQSAAHRAFRSRKESDEVAQRHYTSALQLFRRGVTEFIDGKESNPLMLTVGALVMCFTETAKGDMNGTIFDHLTAANSLLIRLLSQSDTAVPKDLKDFVIEYYTYTAAVSMISVDARVSTQLFLNFDLEQRARQLLQSEYVGNLCGCWLELLLLIPCIFDLGRQWMMHDGRPAMPTADDIVMFSSLQ…
g150.t1	OJJ76910.1	OJJ76910.1 hypothetical protein ASPBRDRAFT_49922 [Aspergillus brasiliensis CBS 101740]	Aspergillus brasiliensis CBS 101740	97.2	457	13	0	1	457	1	457	0	881	MDLPTRPPPSQESLQRYYTGKDISSVPKPAVVLDVAIIKRHCASMLDAVKALDVGFRAHVKTHKTPQIARLQVGEDNSIPANFVISTLLEGETLLPLLKDLRATGRKVNVLYGIPLVPSQVPRLAALARELGEGSISVMIDHPDQVPYLAEFRQLAGHAAAVFLKVDSGYHRAGLPPSMLNKGGLVEKVTEGEREGRLVLLGVYSHNSLSYGGDTPEEVMGFLIEEITGCREALRKNKELFTLPGGRDRELVVSVGATPQVVVVKKLLEKQEGLLSEEARRLKSLLHEKDVDGGGLSVNVELHAGVYPVLDMQQLGTNIHPTGDAEKEVGISVVAEVCSVYNDAERSKPEALVAAGSLALGREPCKAYPGWGVVGDWRRERGSSRLIVDRISQEHAIVA…
g151.t1	OJJ76911.1	OJJ76911.1 hypothetical protein ASPBRDRAFT_219392 [Aspergillus brasiliensis CBS 101740]	Aspergillus brasiliensis CBS 101740	81.9	803	129	3	1	796	1	794	0	1273	MERSIKNVAQQCVDLFTQCLEVPPLMENEWAENRLADMNLWISGTGACAQERASLDSRLASRPEAHDVVVNLLRLLSTVIEECLIRGQTQGFSRSYPDEENSASSEHETQGRSFSPWSDDSSSDGRSTDRYELRNPSRNPLYESMYNIESMLDQLSRIAVAIRRSGRRSRLQRADQLFKVTEHQELEGYLVRMLLIQLKSGTQERDPSKLDEVQLRLVHCNLKRRNRFLYSQRHAMGLEAGYIRRTRVSKPDGSAKETTEGEPSSGSPGDSRMHANKTRITGTSASRLSDGFHLSQRDHALSVTPSAVSTTALDLDYPHPPQLKDDARLFRCPCCCEALPVTMTEKIRWRKHIEDDLSPYTCVLTNCDQPYVLFNTKDSWRQHMLKDHSSMTYWTCFAC…
g152.t1	OJJ76912.1	OJJ76912.1 hypothetical protein ASPBRDRAFT_219368 [Aspergillus brasiliensis CBS 101740]	Aspergillus brasiliensis CBS 101740	96.6	294	10	0	1	294	1	294	7.03e-184	518	MAQQPTYILSPNFHFKPETGPIGLGNIISHPLRPHRALTRVDAATLQNIYPRIERFTQYERSIERGASRDVSISVWAEFLQTVSGKLSGGRGSDVRSNYTMDQLETEYFVTDPPLEEIQARLKAPRVQAVIKAGRIPGFRAPVYMVTGLMIAKGFTASMGNIDRHNGEIEVGGNIPSPGLQIGAGANLAGSTSTAEADSWRAGGDIVFAYQLLKIEVKGWKGDRVEYDELRHKAAYLSKDDDEETDEEDDVVEEIIISSANAGTLSSDHDQGGITVAEVEGGDSRVSCISSSQE
g153.t1	GAQ42970.1	GAQ42970.1 hypothetical protein AKAW_05239 [Aspergillus niger]	Aspergillus niger	64.9	1512	139	7	428	1720	9	1348	0	1779	MFTKQSLVTLLGGLSLALAQTTTEEYPSAAEISAAQATVQPYSPVSNVKGLAFNRFVNIWLENTDFDAAAATEHLSELAKKGLLLNNFWAVTHPSEPNYCASASGDTFGMDNDDFHQIPSNVSTIADLFDTKNIAWGEYQEGLPYPGYQGYRYPESGANDYVRKHNPLILFDSVTEDALRLRQIKNFSSFYDDLENHRLPQYMFITPNMTNDGHDTNISFSGAWTWSFLTELLKNDYFTKDTLIMLTFDETGTYEIGNNIYTFLLGGAVPEDLLGTKDDTFYTHYSVIASLSANWGLPSLGRWDCGANLFSWLAKKTGYVNYEVDTSNLYMNETHWGPLSDNDYSEYYAGWPVPTTDASCSAGNGILSTVKKTYKGLTATFNYTTPFPYDSRSGNNVGV…
g154.t1	OJJ76916.1	OJJ76916.1 hypothetical protein ASPBRDRAFT_36090 [Aspergillus brasiliensis CBS 101740]	Aspergillus brasiliensis CBS 101740	99.8	447	1	0	1	447	1	447	9.69e-275	760	MATVQTINVTLPSLPSGWSADKDFKAVGTISAATQRNLEPVGPHFLAHARRKRHHRTFSEDERIQAQQNVKNTEDDEDDDISEDEDPMLLSREAKDWKSQDHYQVLGLSKYRWRATPEQIKRAHRKKVLRHHPDKKAAMGDRDENDQFFKCIQKATEVLSDPVKRRQFDSVDEAADVEPPTKKEVAKGNFFKLWRPVFESEGRFSKKQPVPQLGDENSTQEEVETFYNFWYDFDSWRTFEYLDEDVPDDNENRDQKRHMEKKNANARRKRKTEDTTRLRQLVDDCAAGDERIKKFRKAARADKDRKRLEKEAEIKRLAEEKEKARLEEEQRKKDAEEAAKAEREKNKKAKEAAKNAAKKNKRVLKGSIKEVNYFGEGGEPSAAQVDSVLGDVDLIISKI…
g155.t1	OJJ76917.1	OJJ76917.1 hypothetical protein ASPBRDRAFT_24631 [Aspergillus brasiliensis CBS 101740]	Aspergillus brasiliensis CBS 101740	100	115	0	0	1	115	1	115	4.42e-72	220	MAPQTALSARSAYRQLLRATRIAFRDDVRVMIAARQEARRNFDSHRREGIDTPMQINHALEVANILRHNIVQGVREQDDENAKWELRIHDDIERGDNDTIRVKGKAVKVDKACSS
g156.t1	OJJ76918.1	OJJ76918.1 hypothetical protein ASPBRDRAFT_24632 [Aspergillus brasiliensis CBS 101740]	Aspergillus brasiliensis CBS 101740	100	385	0	0	1	385	1	385	4.94e-280	768	MPPPQIKQDLNRSGWETTDFPSVCENCLPDNPYVQMLKEDHGAECKICTRPFTIFRWKADRTARQKRTSICLTCARLKNCCQCCMLDLSFGLPIVVRDAALKMVAPGPESTINREYYAQGHEKEIEEGRGAVEEYEKTDEKARELLRRLANSEPYYRKPRQIEAAPQDEEGATAGPSDAPVVHSRYGNGPGPIRTSESRRGTPLPGRGRGGMRGGRGGRPFPSAAQVPPSAEDILPPADPNITSLFITGVEDDLPEHTLRTFFTQFGQLRSLICSHRAHSAFVNFATREGAEAAAKHCQGRAVIQGCPLRVRWGKPKPLDNMDREERMKNAREGRQAAGPRVADSGKKAITAAGEEIGKEQKQRSYAVAPPPGAGEVQYSSLSGD
g157.t1	OJJ76919.1	OJJ76919.1 hypothetical protein ASPBRDRAFT_165402 [Aspergillus brasiliensis CBS 101740]	Aspergillus brasiliensis CBS 101740	99.7	377	1	0	1	377	1	377	2.53e-278	763	MAPAALEQENHARDAEFNRVLHGKSAEAQGGFAAMRNKDAAAQKAAVDEYFKHWDNKSAEEETEEIRAARRAEYATLTRHYYNLATDFYEYGWGTSFHFCRFSPGEAFHQAIARHEHYLAHQIGIKSGMKVLDVGCGVGGPAREIVKFTDANVVGLNNNDYQIQRATRYAEREGLAHKLTFEKGDFMQMKFEDNSFDAVYAIEATCHAPELEGVYKEIFRVLKPGGVFGVYEWLMTEEYDNSNAEHRKIRLGIEQGDGISNMVKVSEGLDAMKNAGFELLHNEDLADRPDTIPWYYPLAGSFKHLTSPWDFFTIARMTWWGRGIAHRFVGAMEKVGLFPKGSQKTADSLALAGDCLVAGGEKKLFTPMYLMVGRKPE
g158.t1	GAQ42964.1	GAQ42964.1 sugar transporter [Aspergillus niger]	Aspergillus niger	92.3	920	53	2	1	905	1	917	0	1714	MTIPSITALGDDPNTTHRLNACAYQQSAVTTSGSIQYVAFYTSRGVADSRRVTIARHDLRDTSSDWQYLTFEDYNQTTDDGHNTISIGICAGDGTIHVSFDHHCDALKYRISRPGLANDPSESSWTAGNFSPILDHLPGCDGLLDVTYPRFIPTDKDMYFECRIGKAGAGSDVLYRYNPDTAQFVYLGTYLVGRQCNPYPNGLSYHLPTNSLHVTWTNRHFIEYEGANDSASTAHKAQAGPNGPENNEGLYYAYSHDNGVTWNGPNQKSVAVLSARPGTGLESQDSRLLVKDIPHNSGIMNQEAQYVDSKGGVHVLNRENTTGKETWVHYYRSPSDNQWSFFVVPEIYPTPTGPRGKLVHSEKLSAVFFVLPSNTENELLIARRISAKMPVDRRALEDT…
g159.t1	OJJ76922.1	OJJ76922.1 hypothetical protein ASPBRDRAFT_49933 [Aspergillus brasiliensis CBS 101740]	Aspergillus brasiliensis CBS 101740	99.2	484	4	0	1	484	1	484	0	915	MSGIRIIASIVPALLLVTGSGVNGLGFEIPSSAPANSSGELDAAPVGVSFEFFAFPEYFQQLPLTNSCLGRLQDASGSYSPIRIGGTTQDRATYNASLSSAVSYSVDSPDDAPESLTFGDSFMEIAAAYEGAVTIGLNRRLNNINNTIAAAKVAKSNIATLYAIELGNEPNFFTSSDPIADGQSWTAAADAASQVSWQASVGSALDETSFTQAGVFFDLDTFTVSNLAEKEEDTDSTQYVRSFCHHYYPQSASTADLDELMSHTEIVEGVLEFQSQVVAAQGLNKDFVMGETNSATGGGGGISPTFGAGLWILDYVMQATILGVKQLFFHQGTIGNCPYCWWDESVNAPFYGAYTAALALSGASKVAQLDTGDSRFAAYAFYDSSDQPIRVLLYNSEYY…
g160.t1	OJJ76923.1	OJJ76923.1 hypothetical protein ASPBRDRAFT_111805 [Aspergillus brasiliensis CBS 101740]	Aspergillus brasiliensis CBS 101740	99.8	452	1	0	1	452	1	452	0	921	MSSDKVQMAEAGNKAEAPPVAVSFFDPALKATRRSVFFQWGRTVLLLCVFILCILSLFWAVQFQAESRFPALTVWVVDFDGQLEPYRNETPIVGPAVTEVVNQILDSSSEHLGYTIKSPADFNNDPWAVRQSVYDEHAYAAVIVNSNATALLRNAVTNGNSSYDPYGAAEFVTISARDPTTYYDYINPFLYELDVAVRSYFGPRWIQTVAQEGYNISQAPQAINPAIGFTSVDLRPFVPAVITPAVSIGLIYLIILAFFNTPFMMPIHMQFIKGNHPPLKIPQWLLWRILSNIGTYFFLSLFYSFVSLAFQIPFTNPSAPDTQTAYNPNAYGHGSFVVYWMLNWVGMCALGFPCENMAMIIGLPWSALFLIFWVITNVATGFYALDLAPGFFRWGYAWP…
g161.t1	OJJ76924.1	OJJ76924.1 hypothetical protein ASPBRDRAFT_36097 [Aspergillus brasiliensis CBS 101740]	Aspergillus brasiliensis CBS 101740	89.9	307	31	0	1	307	1	307	2.60e-197	553	MNNIIALVTGATGNQGGATARQLLNAGIKVHALVRDPSSKPALELQSLGAQLFEGNFDDPSSIKAAAEGATAVFLNVLPTLANPESEVTYAKHIIDAAIASKTVTTLVYSSVTMTGKHKSFPNWGPDYPMAWYWTSKDRIEKMVRGSGIKHWTILRPAFLMYNYHNPTASWMFPGLAKNHVFLTAYKPTTPMTVLDANDVGKFAAAAIANPDAYDKHEIDLGVESLTPAEIAKELSRVSGRDIAAQFYSDEEAKELAAKDPKIGSQLWTNEVGYHVDFEKLKKYPIRLTTFSEYLDNHRDEVLETFR
g162.t1	OJJ76926.1	OJJ76926.1 hypothetical protein ASPBRDRAFT_36099 [Aspergillus brasiliensis CBS 101740]	Aspergillus brasiliensis CBS 101740	98.9	550	6	0	1	550	1	550	0	1117	MAHSALPTDTRPENHPASYDILIIGAGFSGIYMLYHLRKLGYSCRIYESGTELGGTWANHIYPGLRVDSESWVYQLSMPEVWEDWSWSEVYPSGEELRRYFAHVEQKLHINKDVDFRTKVVKAQFIREKSCWRTETEDGRVTESQFLLPCTGLASKSYTPAFRGMENFKGKIYHSEYWPKEDVNIQGKKVAVIGTGSAGIQIIQEWAKEAGTLTVFQRTPNLALPMRQLQLPQEQQVIKSMYPHVFRDRGKTFAGHVASQIPKRTFDVSPEEREAVYEDVWKKGGFHVIIGGFIDVLTDPQANRALYDFWARKTRSRIHDPRKRDLLAPLEPPHPIGAKRSSLELNYYEVFNQPSVDLVNVREENIVEFKPHGIVTSSGAYYELDAVALATGFDGLTGS…
g163.t1	GAQ42962.1	GAQ42962.1 monocarboxylate transporter [Aspergillus niger]	Aspergillus niger	81.2	852	105	3	1	797	136	987	0	1317	MWTMTTSMSSQLEHLCEPFYQSVRKLLGCLERADSNTNTDRIEHIQALLILAVYEFTHHTFSRGWLSAGQGIRLAQLMNLHKIDLSNEGKANPHEASGLDDPVYTEEKRRVFWLAYILDRLISLVNESPLTIDERVIATRLPAGEEAFQTGRLSQMTGFLSKTITEDVPLPKAELSEMVILASLCGKTVLHRQQAAAEQADCSISNSFWERHRWLDAILVKKGRTISPLLPASPTMPTNLASLTSNLMVQSALLYHCMTLQLLPGGIESSETVLQCRQTAFLAVQEIIRLTGAVLQLSYFEIAPFTPLPVLLCAKVLMMYRDTDPSCAMQLQEVLGSAAEQVASLPQDVERPSNSRNEPVPEPVYPQWHYVAVVAAGFIVMITTCAFVFSFGVYQSLYE…
g164.t1	OJJ76929.1	OJJ76929.1 hypothetical protein ASPBRDRAFT_36103 [Aspergillus brasiliensis CBS 101740]	Aspergillus brasiliensis CBS 101740	100	155	0	0	1	155	1	155	1.80e-81	247	MSTTTTATTSAASCTSTGNLYVLPVQDAACALPNTNNASAIMDKCCSSATPTKYDNDCGIYCLAQGQDVKELLSCIQSNGAVENPFCSGNLTATATASVTGTRATSSSTKTGTSTGSAASETGSSGAVAMKQVGVSKVGLGMLGMVVLSAVLGGF
g165.t1	OJJ76930.1	OJJ76930.1 hypothetical protein ASPBRDRAFT_190276 [Aspergillus brasiliensis CBS 101740]	Aspergillus brasiliensis CBS 101740	90	319	29	2	5	323	3	318	2.79e-193	544	MSTTTTTTTTNPLTTSLTTSEPDQIASLHLIADSIAQQRQLAARSMLTHPASLSLLTLSLFITYFFTRSLKNTTSGGGEEDNWPFLLLITWPACIMVYLLAAAHTTHPYLEKAGRTGTWVWLWRGGTRYKHRRRHSPPLPPAEASLSTPSTARGGYKTPMRKDQHDAEDNKGHRKGEEEEEDIMLVTKYHNRVIGTLVLRIIRTEEELWGHVRDAVVREELYQTSSSSAAAASTSSSVSTPACQPVGVIRAWTVAQHFRGIGVGKNLLGIAIRMCRECGINGPVFSDCHANEVLGLPVVCNGELVRRERWAREVLKGVKREVEGGY
g166.t1	XP_035351752.1	XP_035351752.1 phosphate:H+ symporter [Aspergillus tubingensis]	Aspergillus niger;Aspergillus tubingensis	87.9	571	30	6	1	539	1	564	0	954	MAASSSAAFPNYNVDLSHVEDPNERRRLALSRIDDAPFGRRHARAAVVAGVGFFTDSYDIFAINLCSSMLGVVSTSAGTVIGQLFFGWLADIVGRKRMYGIELIIIILATLAQCLSSNSPAVSITGLLVFWRTVMGVGIGGGYPLFANTKHGGAMMGAVFAMQGFGQFAAAIVALIVTVGFKGSLESAASVSKCSGVCQLAVDKMWRVVIGFGAVPACLALCYRLTIPETPRYTFDVARDLLKADEDVEAYILGKCEGHPDEVQRVAVLQSADIRPATPKASWSDFHSHFTKWKHGKVLLGTAGSWFFLDVAFYGLGLNNSIILTAIGWNGGSTVYEYFYRNAVGNLILICAGAIPGYWVTVATVDRLGRKPIQITGFLILTIIFIVIGFAYEPLKKSD…
g167.t1	OJJ76931.1	OJJ76931.1 hypothetical protein ASPBRDRAFT_49939 [Aspergillus brasiliensis CBS 101740]	Aspergillus brasiliensis CBS 101740	92.6	552	40	1	2	553	1	551	0	936	MMASSGSDAAFAYHEPTIATLLNQAGFLVVLNLINACLDKLLYCGLIGQLFIGILWGTPGAQWLDTATERVIQQLGYIGLIMLVYEGGLSTSIKSMRANLIISLCVAFTGIGAPMGLSFILMKLVSASPLQAFAAGASLSATSLGTTFTILSTTNLVSTRLGTVTTSAAMLDDVVGLVMVQIISNIGGSASSFNAITVVRPLFVSIGFALGVFILCAFCLKPILQKALTMRRDLPLFMSTVQFVFLAQTSVLVGLVAGATYAGTSSLFAAYLAGVIVSWFDGLAADIRVPNTDKARNIPQSEHGVRVEQTNEQSTPQDRSNSNISSTSQTPPCSPHDEIPTGMSVYEKYYKESVNRILIPLFFASIGFAIPISKMFRGDVVWRGIIYAILMMFGKMVTG…
g169.t1	OJJ76932.1	OJJ76932.1 hypothetical protein ASPBRDRAFT_24647 [Aspergillus brasiliensis CBS 101740]	Aspergillus brasiliensis CBS 101740	97.8	1869	41	0	1	1869	1	1869	0	3609	MAEAQKVLSWYNGLYSRTVDLVGDYAGSELFIIEGDSLLLHCFANDQLDFTKGFQLLHATYIVERLLAELRRRNCNFHIVFFAENSPVSIPPYAPELSLPKYRLAREAILQHLQQNAPKAFPSMQVRCFDTYDCSEFENYLASEGVYFIMCHDGAFSGHSRHGREDSKDLEVLSDDSSDGGSDETFDSDLPAFWPNRITLRSMIHWFVAHGFNISLLNSLECRDTKVFTMVLDGSAERARNLFCADSASLDITEDTGSSGSDTEDVESGSSMVHCQVEASFSAQNPSPNRSSSVELTLRNFLRILDTIDHNLTQREWITILTASALLTSDSNKSESSGLRALLLHTIILSECKLGNRVNDLKYSRPGEWLLVEYVEVSRSMITSPLWHDARTSKPMICD…
g170.t1	OJJ76933.1	OJJ76933.1 hypothetical protein ASPBRDRAFT_36108 [Aspergillus brasiliensis CBS 101740]	Aspergillus brasiliensis CBS 101740	98.9	462	3	1	1	460	1	462	0	924	MARVRLAPLTSLTQTRYVLHLSDGKRLVLFRLPTIETPKTKDKPRARNDANGWSYYAMEAECPHAGGPMKDSSIDIEDSAYIVSCPWHAYDFNVETGESSVGIKACTFPVDVRDEEMVVVEYSSEKLGESVELVKLEAVSEQMKLKKSVNGANGATATNGAGGETDTAPIRYLDDNATVCEWCAHILNTSNPEHKIELTAHLFKLFTEREGTDKPMVIGDRSNVDLPDLPPRDGVKDVNRQAVPKPGRGGTQKSRINMLHALANIEQWAIDLAVDICVRFAKFQTNSADALGLPRAFFHDWLKVANDEAKHFSLLRTRLEELGSYFGALPVHHGLWDSASVTAHDLRARISIIALVHEARGLDVNPVTIDKFRKAGDGDSVDTLEIIHNDEITHVTTGH…
g171.t1	GAQ42954.1	GAQ42954.1 beta-glucosidase [Aspergillus niger]	Aspergillus niger	94	1476	80	1	1	1476	1	1468	0	2826	MLLHFMVYAALSSVVTSVSLQPRLQDGLALTPQMGWNTYNHYSCSPNETIVRSNAQALVDLGLSSLGYRYVTTDCGWTVADRLADGSLTWNETLFPQGFPALGEFIHDLGLLFGVYQDSGILLCGSPPNETGSLYHEEQDARTFASWNVDSLKYDNCYSDAATDYPNVVYAPSTSPEPRFANMSQALSQQNRTILFQICEWGISFPAGWAPALGHSWRIGNDIIPAWRTIFRIINQAAPQTDFAGPGQWPDLDMLEVGNNIFSLAEEQTHFSLWAILKSPLIIGAALKDEVTAINDASLAVLKQKDVIAFNQDALGKSASLRRRWTEEGYEVWSGPLSNGRTVAAVINWRNESRDLTLDLPDVGLQHAGTAKNIWDGTTAQDVLTSYTATVAGHGTILL…
g172.t1	OJJ76936.1	OJJ76936.1 hypothetical protein ASPBRDRAFT_36113 [Aspergillus brasiliensis CBS 101740]	Aspergillus brasiliensis CBS 101740	99.1	323	3	0	16	338	1	323	3.75e-243	671	MAASPNSALKIVFGAMTFGEPGTLGARVHSTEDAGQILDIFQEHGHDEIDTARLYGGGSSEQMLTALDWNKGRKLVMGTKLYPNYIRAAKGAESYSHRPEDVRRGLIKSLQALNTDKIDLFYLHGPDRQTPYEDTLREINALYQEGLFNRFGISNFMSWEVAQICEICQKNGWIKPTVYQGIYNALQRSIEPELMPCLRFYGISLYAFQPLAGGFLTGRYHRDQSEFEAGSRFDPKGMQGTLHHARYWNDAYFDALDLLRAAAEKYDLTVGEIAMRWLKHHSELSAQRDDAIIIGASSVHHLEQNLKDLESGPLPDDVVATVEKAWLLAKGQAPKYWH
g173.t1	OJJ76937.1	OJJ76937.1 hypothetical protein ASPBRDRAFT_36117 [Aspergillus brasiliensis CBS 101740]	Aspergillus brasiliensis CBS 101740	99.5	184	1	0	1	184	1	184	4.52e-130	372	MQLKNLIFAAATAAALPATDAVTNEPFGVVSIHSGSGVQYAPFNAALGSIFAGLKSQNASCSNPQDQTATFVLDGGALYLYDQSATPQELYVDRSGMGQGKIGYTTGAQPAPKNGERTGWTIDQNNHLQFGGKDLIACPNSIEGAWSIWADAGVAKPGYNEGCVGIAARVEKSKNPNVCYYTSN
g174.t1	OJJ76938.1	OJJ76938.1 hypothetical protein ASPBRDRAFT_36118 [Aspergillus brasiliensis CBS 101740]	Aspergillus brasiliensis CBS 101740	97.1	205	4	1	1	203	1	205	6.38e-24	104	MKYALTTIFLTTLLATPSLSTPAPDVVSDAIGVAQTIASGGESIATNIANDATSIASDVATGGAAAYSSLTSGAGDVASNAESWGTSVASNARSDASAAASDVRSKASDVASEITSRWESATTLTGSNGQPTSTETVSGKTTLTASTASATGSGSSTSGTGSSASATSSTSEGAGVMAVATPGVGLGMGVVGVAGVLGVMAAL
g175.t1	OJJ76939.1	OJJ76939.1 hypothetical protein ASPBRDRAFT_115119 [Aspergillus brasiliensis CBS 101740]	Aspergillus brasiliensis CBS 101740	99.4	541	3	0	1	541	1	541	0	1064	MAAKASPTAVSANSGAEEAGLSDPGDSQLLAKMGYKQELRRQYSTVQIFAVAFSIMGLVPSIASTIAFSLPAGPAGMIWGWFTASILIFFVGLALADMASAMPTAGGLYWWTHYFAGKKYKNALSFLVGYSNTLGLIGGICSVDYTLALMILACVSITRDGTYSASNGTIYGVYVGLILIHAVTSIFSGPIMPRIQTFCIFINIAIIIATVIALPIGKVTRGESLNSGSWVFGHVDNDSTWPTGWNFILAFLAPIWSIGFFDSCVHMSEEALHAAKAVPLGIIWSSGCACVFGFLVLSILAAVMNQDVDATINTVFGQPMAQIYYDALGKKGALGFMSVLIVIQFLIGLSLITAASRQAWAFSRDGALPFSKYFRHVSRRVRYQPVRAICGLVAVSIVF…
g176.t1	OJJ76940.1	OJJ76940.1 hypothetical protein ASPBRDRAFT_165456 [Aspergillus brasiliensis CBS 101740]	Aspergillus brasiliensis CBS 101740	99.7	349	1	0	1	349	1	349	1.51e-249	688	MQPVAHQSGGASGDPLPPSLPTEAIEEKASVSSLGSWNHLVAGATGGMVTAIVTSPLDVLRTRLQTDYYQTQGPNRAIPTHAHARQSFVRTSIRHFRETFGILFSIHRVEGWRGMFKGLGPSLTGVVPASAVKFYTYGNCKRLLPEILGCDKDTTLVHAMSAACAGIATGSATNPIWVVKTRLQLDKAGARRYKNSLDCTKQILQQEGPKGLYRGLTASYLGTIETTLHLAMYERIKGLISKEVNLDKNSDSNKFVQGLALSGASGLSKLFACLIAYPHEVIRTRLRQAPMADGRQKYTSILQCARLILKEEGVIALYGGLTAHLLRTVPSAAITIGTYELVLKVLEGR
g177.t1	RDK40671.1	RDK40671.1 hypothetical protein M752DRAFT_337180 [Aspergillus phoenicis ATCC 13157]	Aspergillus phoenicis ATCC 13157	48.4	938	141	1	1	595	14	951	1.50e-257	743	MGEKKRKPVRRDPEKRRQQNIQAQRRYREKLRERLGRLEALAESAGQTSAIESTPAAGILPSGAITAPGLPIAPSNIASKSLPFYDASNVSAPWTSVATLDNCKQLIPASDGTSSALCTSDSTTSSYLYPDGSPSSISVWDPPSYVDPSLLVRKKSNDNLELYWTTTIDCGCTSPHFRIQTEGPDLLGHIEVRVFRFGTKTITADPYANTLRIDRVCTIAAILDLVKHVGITEEALCADESLSPFFRSGAGTLDDTGKNSLVRTVQETFKTLKPDLRPCQEQITIEHHPIIDILPFRTLRKALITRQNDVDEDEFFDDMLSGLLLVTTPILRGYSLKDRRWLEFFCDGVSDIVWDPRPFKSLTLPDNKVKDLKDVVLAFASSQSKKSDVSDDMLQGKGR…
g178.t1	XP_035351766.1	XP_035351766.1 phosphatidylserine decarboxylase [Aspergillus tubingensis]	Aspergillus niger;Aspergillus tubingensis	94	434	26	0	1	434	1	434	1.39e-304	835	MFGIISLPSRSASTVSGASTSNMRYAPIGNELLQLLNKSFPYASGMEALDQAIQSALQYRIVEMESYGLVSAKGFLNFATWMVDGWIPTESAKGRDIYYILCIFYFVFDQVPLKDCQTAIRPESVGQELSELSQWMVKFAKEVGSHMDRSESLNEASLTSFWNAPSFHVFEADESKTEGGKWTNFNQFFCRHLKDGARLIDGEGDDSIVIFPADSTFSGYWDITDESMVELKGLPWHIGDLLGPYKSDYGDSFKGGIWLHSFLNSFDYHRQHAPVGGTIKVIDTIDGAAYLDVEYQPDSRSLMPKRPMRPIYSSGPIYRGAEATDKEGYQFLQARGIIIIENDKIGTVAVLPIGMAQVSSVVVRDDLKPGATINKGDEISHFESGWSDIVVMFQGGKID…
g179.t1	GCB19396.1	GCB19396.1 uncharacterized UPF0442 protein C7D4.12c [Aspergillus awamori]	Aspergillus awamori	92.1	800	60	2	1	799	1	798	0	1357	MSEGRRSNESSSSSLISYHSVERPNADFDAEKRQDFSPESDSSPSGPRTHRVHFGEDRRFEYGSWDSDERVFSPGISHLRRRSSAQASVDITDASRRGRQSTSTNGGEDETEKKQQPTTGEKRSRRERLKAFRDTLKEKASNLAARLGRPDDINEDDLQPIDHRRRNAVTDFELREENQDQTCSTEAHRIIRELAHDSSGRRPSARRDSALHRAAGVSAQDDDSGNEVVPRRGSGSGGVLSQLLRLSGGLDHFQKGARGLSLASDTFYPFGGSTPGTTTPRKEKVRWYKKPGNVSASTLVGGGSASGASTPVTGELLSAASRRRDRNRRHSMRLEEEIQVTLQIAEIIARQRYIMQLCKALMRFGAPTHRLEEYMRMTAKVLDVDSQFLYVPGCMIMSF…
g180.t1	OJJ76945.1	OJJ76945.1 hypothetical protein ASPBRDRAFT_113410 [Aspergillus brasiliensis CBS 101740]	Aspergillus brasiliensis CBS 101740	99.4	462	3	0	1	462	1	462	0	938	MTPSQDTLSPLVVSDKAFHHEEHETSDLPPSRATFVRQRRKLRLISPAWYRNSLLASVGFLEFANAGDFAANVWNDVPVPLYAVIFMAIGGPLALLISVAALWDGILSWRNVRSLQQERQYLHALRLQYLDLPPSVPVDQASIRLIDRRLGVSFRELGSELIDRVVMDVFLGVGALLVGTGTIMAIWGAHRHIYYISNLLSGFVGNSFAAAYGVLNAVWSLYLIWRFHGHDRACTRSSAVTPFRDRLHRRFLYFQLHSLVSGITGLVAGAASMLTCKRWWGYVMLIPCMIFEVGCNQFWRVQLGYDRLIVTEQPHWGLIPDFKASKEDDEEKDSVLLETLASVIAMQNALTPHPTAMVDVDWSSLDSLLMFIVHNHLFDSLCGWLATHSSVPKDFHHSL…
g181.t1	XP_025536440.1	XP_025536440.1 hypothetical protein BO79DRAFT_272872 [Aspergillus costaricaensis CBS 115574]	Aspergillus costaricaensis CBS 115574	59.8	346	78	5	1	285	3149	3494	3.61e-110	362	MSGEAVPQKLLQSFCALDCPSVQLLNLYSSAGTLFGSTWQGLIEYRKSDLELPPAAGYASPNQAIYTVNSELRPLPVGVPGEILIGGASVAAGDGKMDTITEKFIKSFILRLNSNFAAENWTTKRTGLVEAAGGVLTNAVVTSREQEDDQFLAAYVAFSSLLPPGNDQEFLDNLQMRLPLPDHMIPSAIVLPLYESTVVSSTSQEVTPMEASLAEVWQGVLPTSASLTLTPRLDFFRVGGTSLLIVILQRAVKEHYKVALPVTELVATKKLADMAHLIEDKGALA
g182.t1	XP_041542965.1	XP_041542965.1 putative secondary metabolism biosynthetic enzyme [Aspergillus luchuensis]	Aspergillus luchuensis	38.9	244	53	4	1	148	1	244	4.32e-35	134	MVARLNTYLAVVTQGPKKARLSRNIGSQSNGLETYRLCANQPMTVPWACDFAGTVEEVGPKVAKLFQTGDRVTGITHGCNAVRPEDGAFGHHSVLGQQFRHGRRIRGRYVFDYTKPNAAAEIRKYTRDNLKLCFDTVAMTASAQFCAEL
g183.t1	OJJ76949.1	OJJ76949.1 hypothetical protein ASPBRDRAFT_70501 [Aspergillus brasiliensis CBS 101740]	Aspergillus brasiliensis CBS 101740	95.9	466	19	0	1	466	1	466	0	917	MDDFKRLRPAGPLEKFFIACNETGINSIVAVSATYILPDTFTRPLRDYIYQACGSLIDQHPSLSAIPAQGADGTWWFVRLPEIDLSQPVSFQRRIHDFPEVEEPDVELCELLQIQQCTGFKASLPCWRLFILTDRDEANAQRFTAVYIYHHAIADGISGKAFHETFLEALHDVDVSLTRGEPTKQVIQSPTTPLLPNLELLHPCPSSLTFLLYWLFKDKVWSYPEPNLWTGPELFIPKKLQIRQIILPAAVSAAFRRNCRENKSTINSASHAAVAHALFAHLPKDYTKLQIAGAMSCRRWLKEGGVVTDRSMGNWVMDFKERFSRDKMNRFDPDAFPWSEARKSRARIEQTLSRGGRDTSVSLLKHEANIQDYLQGRIGKSRFSSVEVSNIGILKSDKE…
g184.t1	OJJ76950.1	OJJ76950.1 hypothetical protein ASPBRDRAFT_36129 [Aspergillus brasiliensis CBS 101740]	Aspergillus brasiliensis CBS 101740	100	734	0	0	1	734	1	734	0	1469	MGLFAGHGALEQAEQDNFGVDWVIHYSFEDVELSQAIQEFRTLIHDLQEAHLQVQVRHGYGASLLVCIRVPSDLLGNLVHKSRVKDWLHGIIHEFPEGGDEGETEADTPAEALRSVYHAVTWQKHLGGAGITPKVGQWKNITAAIPLHDRSANAELLRKWSRTIFLTAEDLDAIRALFGEKVAFYFAFIHCYSCFLIFPAVWGVFSWFYLGPYSITCAVVTCIWGIVFVEYWKTRELDLSLRWNVKDVGFLKVNRPEWVWDREFQNPHTGETIRVFSAHRQFARQLLMIPFATVAILALGSLIILSFALEILVSEVYNGPMKAYLEFLPTVLFSLSLPSITNVLTEFAKRLTDYENYRTQDQYDLAQTAKTFVMHFITAFLPTLLTAFVYVPFGSKIAP…
g185.t1	OJJ76952.1	OJJ76952.1 hypothetical protein ASPBRDRAFT_36131 [Aspergillus brasiliensis CBS 101740]	Aspergillus brasiliensis CBS 101740	98.5	268	4	0	1	268	1	268	2.19e-199	555	MTTYTTDHAPAVLQTHSWRTISNSVPYILPYLKPNMKILDIGCGPGSITVDFARHVPLGHVTGVEYVSDPLDQARTLASTQGITNITFQVADIHSLPFPDNTFDLVHVHQVLQHIADPVQALREMRRVAKPHGEGIIAARESSAMTWYPENKGIERWLEITTKMAREKGGNPHPGSRIHVWAEEAGFSQDVIKKSAGAWCFSSPEERRYWGGSMAGRAANSGFATQAVEGGFASREELEGIVKGWEEFMECEQAWFGLLHGEIVCWKY
g186.t1	OJJ76953.1	OJJ76953.1 hypothetical protein ASPBRDRAFT_190297 [Aspergillus brasiliensis CBS 101740]	Aspergillus brasiliensis CBS 101740	94.1	272	14	1	1	270	1	272	5.59e-82	258	MSYYPPPQEPYYGGRPPYERPPYDRPPYEGGPPPERPPYDRPRYEGSYERPPYDRPPPERYNSGPPPPERPPYDRPPYGDRSPYEGGERGFDSPAPRPPYASPPPSSRPPPVPPPPLPMDWAQEWEPNVRRAYYVHMPSGRTEWELPADMSRDMPPPGPPPSGGPGYYGSPPPPQEGGYYPGPQSQQLSEEEQKKKDRKNMLLGGAAGVAVGALGAAFISHEIHEHEEEEEEEERREQSYDQPPVVYERETTIIERGEEPAYEPYDEDSW
g187.t1	OJJ76954.1	OJJ76954.1 hypothetical protein ASPBRDRAFT_49956 [Aspergillus brasiliensis CBS 101740]	Aspergillus brasiliensis CBS 101740	96	776	15	1	1	776	1	760	0	1278	MIPSISTPLTDISSLCHADRIHSWAKAHASTPNTQSQGHNQSNTQSSEDASAQDAQVKEGIRDPASPESEKDANQTTERGLVVRMKDGIVRFTGHTKRALCHSWVNVLLVFVPVGIATQAAGLNPGLIFAMNAIAIIPLAGLLSHATECVASRLGDTVGALINVTFGNAVELIILYVICVLPRRFVTNVSAAFHSFSIALVKVSKLNVQAEDRSNIVQNEIRIVQASLLGSILANLLLILGMAFLLGGLRFQEQIYNSTVTQMSACLLSLSVMSLLLPTAFHASWSDSTDADKYTLKVSRGTSVVLLLVYVLYIVFQLKSHAYLYASIPQQIIDEESHPGILAEFMNSSSDSSSSSDESVDTTTSWSTAKRIKRAMKHRRHRKSSTSSHGTASPQSFRK…
g188.t1	OJJ76956.1	OJJ76956.1 hypothetical protein ASPBRDRAFT_112331 [Aspergillus brasiliensis CBS 101740]	Aspergillus brasiliensis CBS 101740	98.7	889	11	1	1	889	144	1031	0	1666	MIWAANTVRAWRPQELQDPMVAFSIFSSVTITRGGMFTTLSEGLSFISRLLKGFMLGFAIATGVSLLILPITSRGHVFDDIRGYVAQIDNVLQSQIDFVKGTSEAWTGSQGLLKRTRTARSMRDMQNSPISDLEAKKKRLTASITKLNGLHGKLQSDLLYSKDEIAWGKLSAGDLSRIGGLLRSILLPLSGMAMLPEVLDMIVKNEGTRSNSLRSFDGAEDSLKQSEMEKVAQTLQKRLVDSSKLVTVGLQYVLLALGLSKRKKLEKQYAGKADEEGAGELLTPLEPEFAQRYEQEMRNYFLRRKDLTRNLASLEAFTVSEKPDDATSQEDLAAVATDPDVKQEFFLILFMGHLQDNLLTATLDLIRFADDRIQDGTMKRSRLILPRLNTIRKWLSFET…
g189.t1	OJJ76957.1	OJJ76957.1 hypothetical protein ASPBRDRAFT_24669 [Aspergillus brasiliensis CBS 101740]	Aspergillus brasiliensis CBS 101740	97.2	599	17	0	2	600	1	599	0	1169	MMIFPKCLSLIVLPALAAANCKTAPGDAAWPSVEEWSALNQSIGGTLIRTTPAASSCYAGNPLGSSYNCSSVKDHWSYAAYHAAWPESNDYSIYNNNSCVPPGVSGYTKDKGCSIGGMPQYIVNATTEEQVATAMSWASQKDIRIVVKSTGHDLIGRSTGAYSLSIWTHNFKHIQHNPTWHLPGTNKTADVLICGGGNNWGTVYTAVHQMNRTVVGGEDATVGLGGLIQNGGHGLLSSHYGLASDNVYQVTVITPDGRILTANDAQNQDLFWAIRGAGGGQFGVVTEFILQTHPIPDNVVTGGLTFYAASNSNASELASWTAFAELAAQITTLMDSGITGTIMAATGESASAYTGLNEVLPGPAVIISLIAYNSTVQAMNTTLHNLSTQLSNHTTNNQI…
g190.t1	OJJ76958.1	OJJ76958.1 hypothetical protein ASPBRDRAFT_190301 [Aspergillus brasiliensis CBS 101740]	Aspergillus brasiliensis CBS 101740	92.3	418	30	2	1	416	1	418	4.30e-272	751	MLKSISTSRTFLCHLRPRRPSSLPRTLPLNQLRSRRLTQTPRLRDFTPIYHPRPISYAFDPATPTPANQSGPTPRAFTFLHPSNLTQDPEYRHTIPLDPPELKVPWPSSLPCALQSKHWREAEHAARDLLQTLFPSDNNNPNSKGEKYLTAVTDGVVSCAINLIPLCDLARIKLLSRTFVLAFLHDDAVDAGNIDDDVNTDILIPTENKHQGSHKAFDIISKEILTADPINGAILIEDILSWGSTSRNHQQGPTRFDSLDEYIAYGLEDFGASLILRCVEFSITIPSASSSPIDLQSISYLKSLCAKHLFLTNDLYSYAKEVASGDAGLNAVRVMQDLMGVSDSSAKMMVRGMLRDLEGQMDEEYTRLLLLMKSNRTVNEAQLRHARAMIVAVAGNMFF…
g191.t1	OJJ76959.1	OJJ76959.1 hypothetical protein ASPBRDRAFT_220657 [Aspergillus brasiliensis CBS 101740]	Aspergillus brasiliensis CBS 101740	96.8	412	6	1	1	405	1	412	1.26e-303	830	MRLSSFYVLSCALQATATILQNGQVREDPYPGQAKAISLDDGSWRSYQPDASEISYKGRWDSKYVSWWSLPGIKLGFTGEQLAVSFGPQTSEGVLLAYRIDGLDWQFSNVTANSTYQFAGSWTPGLDLSKNNTFEMRVQLAGVSVASDSQLVAVPQYNKTVEIIGDSFASGQYGSYEGLSSWAYNYAAGLGDVEYSITAYPGICLTDEQCYADKARGMTHQWFYTSDAGVRANATYGNQPEKWDFSAHRAADLVIIDLGTNDHRAVNDIPGSTFYDSYVELVTSVHETWPNAQVVIMSLWGNFTRSGDTYVQSPFYVSEIQRVAQHFQDDGFVYYFDTKGVLQHNDIDPQEHPTDVGHIKVASHLMQWTKLKLGWEFGATGPEVQHDTLYWNNEDSYRR…
g192.t1	OJJ76960.1	OJJ76960.1 hypothetical protein ASPBRDRAFT_113376 [Aspergillus brasiliensis CBS 101740]	Aspergillus brasiliensis CBS 101740	100	480	0	0	1	480	1	480	0	957	MVRRIASATPMAQSPMSPLGTAYCVRPNPVSMNIQRRPFVVASTDEPKVTIIYAGLLIPGAGEPLRNAALVISDKIIAFVGPEVDIPKKYLRSTQSTHRVPVLMPGLWDCHMHFGGDDDYYNDYTAGLATHPASSGARLARGCWEALQNGYTSYRDLAGYGCEVAKAINDGTIVGPNVYSSGAALSQTAGHGDIFALPAGEVLGNYGVTNPRPGYWGAGQLCIADGVEEVRRAVRLQIRRGAKVIKVMASGGVMSRDDNPNFAQFSPEELKMIVEEAARQNRIVSAHVHGKAGIMAAIKAGCKSLEHVSYADEEVWELMKEKGILYVATRSVIEIFLASNGEGLVKESWAKLQALADAHLKAYQGAIKAGVTIALGTDTAPGGPTALELQFAVERGGMT…
g193.t1	OJJ76961.1	OJJ76961.1 hypothetical protein ASPBRDRAFT_220682 [Aspergillus brasiliensis CBS 101740]	Aspergillus brasiliensis CBS 101740	98.3	174	3	0	1	174	1	174	6.26e-123	353	MARKFPVDSAGPDIVRDYIIQVLIRKHEATPEYAEKLATCWQLGRVRELRDATLKHLQEDFGNDVGLCLYRAIREDMLEDWQETTAAAVTIWLVSTATMIHIVVLGLFILPELGLMTPCERILLAKSPASWLLFGFAWINYAYQRWDLEGPDSWSFAGAVGLVSVIMGLWLTTV
g194.t1	OJJ76962.1	OJJ76962.1 hypothetical protein ASPBRDRAFT_112021 [Aspergillus brasiliensis CBS 101740]	Aspergillus brasiliensis CBS 101740	99.6	284	1	0	1	284	1	284	6.26e-64	213	MKFTAALFTLLATSVMATPTKVAREPTLVERDAASITSVLSQINSQVQSLDSVINSYSGGDPSKVESASSSLVSAINSGVSTVNGGSELSATDALTITGPVQDLTKEVQSTIDDLISKKSDFVAAGAGATVYSQLQKQYTASKNLADAITSKVPSSLSSIASSLSSGITDAIQKGVDAYKDVATSSASSSSEATSATSAASATDATTAATTAASTTESSAASTSSSPVIPSSPNTSASASATPSSSASASASASPSLYTGAANVERFSYTLGGAAVAAAIAIAI
g195.t1	OJJ76963.1	OJJ76963.1 hypothetical protein ASPBRDRAFT_36140 [Aspergillus brasiliensis CBS 101740]	Aspergillus brasiliensis CBS 101740	97.2	501	14	0	1	501	1	501	0	1006	MERQRFSPFLLSPFDHFFPPILFLSEVLYFPTQNKQGAIEDLQLGLSRLFKLVPCLTGVADYTHGSDKPNVVEVRPVSANEDTAPLVKIQHYPQYGLPATVNSDDRKRGERGWSGAAGNESWRCLTPRFDETTVPAPVFSAQINIFADGVALGLVVNHMVFDGMGNGKIIDLFERCCRDPTTATSSFSFAAEVETRQSLHELGRIRTVPTVNHTSSAVKNEAKQQKQELVPGEGIVYDGTELNYNFIISDERMRLLKSRCNARLPTIICSLGNEEKGQPKFVSSNDVLTALLWICNAWVQKKEQSSLGVAVNCRERFPKPLPNNYLGNSVAYANCTLSRSELQCLESWDKPHWQQSLCQEIIDNEPILDLLTRMAYRIRCRLFNLDADELGRLAASYYH…
g196.t1	OJJ76964.1	OJJ76964.1 hypothetical protein ASPBRDRAFT_49963 [Aspergillus brasiliensis CBS 101740]	Aspergillus brasiliensis CBS 101740	75.3	1911	20	3	121	1579	1	1911	0	2669	MMAGSKEASNTPQRGKRAPRRRRTGSVAAGGNKDGTEQENSSPSHPTSMGKRSRKGKGKRQDRGDMSRPETAERDNLVRKTSRTEYRPLPCTSRIRLSLTGPSMELSAAQMQEFLENGLAMIDESPDTRRTFVESLATESGLRKVRQIVETEFAISYSVLKPMFDPHCILFLRLVSHDELLSSLILEKAVGTIYNVIYGPSGRRATGFFTRVTDFLTQIRADGRGQTVDQNCATRNEVLSLILRVLLGTLTLNHEAAIQVDLRMVAGRLYEIYSVDNTDAVADDDNLQLAYENILKIRDILSMGDTIPISRKPEKLQTIESNQQGSTRYVIDLPGELSDLGPRHDNDKTAISDIQILPTISEILNADRPEFLPARGAADSPIEHHERGIRRLLDSQFRL…
g197.t1	OJJ76965.1	OJJ76965.1 hypothetical protein ASPBRDRAFT_190310 [Aspergillus brasiliensis CBS 101740]	Aspergillus brasiliensis CBS 101740	100	91	0	0	1	91	1	91	2.47e-60	189	MPQDFKNAHYSYDYLHGLREKYEKSAKDFCRGMTFEDALAHVSSTGRTDFTREQLEAFDTNHDGSINFAEYMELMLNNDKELEFRNAKFIA
g198.t1	OJJ76966.1	OJJ76966.1 hypothetical protein ASPBRDRAFT_114806 [Aspergillus brasiliensis CBS 101740]	Aspergillus brasiliensis CBS 101740	97.1	453	11	2	1	452	1	452	0	911	MWLSLVCSILLPLGVVNAQSQYLNNKTKEFVVNGSAIPFVNFDIGESYAGYLPNTPSGISSLYFWFFPSSDPNASDEIAVWLNGGPGCSSLAGIILENGPFLWQPGTYRPVRNPYAWNNLTNIVYIDQPAGTGFSLGPSTVVSEFDVARQFMDFWRRFMKTFDLQNRKIYLTGESYAGQYIPYIASQMLDQDDDEYFRVAGIQINDPYINEVPVLQDVPALATVNQHRSLFPFNDTFMSEITKLSDDCGYTSFLNDALTFPPVSRLPSVPSNSTCAIYNTIINASLALNPCFNRYHITDSCPMPWNPVGGPNVGLGPTNYFNRSDVQKAINAYPTDYFVCKEGIFPTADGLDTSPPSSLGPLPRVIERTNNTIIAHGLLDFELLAQGTLISIQNMTWNG…
g199.t1	OJJ76967.1	OJJ76967.1 hypothetical protein ASPBRDRAFT_36145 [Aspergillus brasiliensis CBS 101740]	Aspergillus brasiliensis CBS 101740	98.6	358	5	0	1	358	1	358	4.58e-260	716	MSPASIPTHQTAACVDNPSPGATLTIRHDIPVPSPGAGEVLVKLEYTGFCHSDLHNINGDLVMTTNVPGHEGVGRVVQVGPDTPAEMMGRRVGVKWLYKSCMKCPTCKVQYTNCRNQDNSGRNVPGTFQQYVVSPANFVSLIPEDLNPEAVAPLLCAGLTMYGALSKIEKLYEKGDWVVIMGAGGGLGHLGLQIGKEMGYRMIAVDSPSKKDICLASGASAFFDFKDDNLIRNIQSLTDDIGAHAALIVVGSEKAYEQGVALLRPLGTLVCVGFPRPDFHVPVAPHYCVDNGLLVIGSAVGTETEMQALLELARAGKVSTHYEVFDFEEINDVVEKMRRYAVSGRAVLRVPSGESARM
g200.t1	OJJ76968.1	OJJ76968.1 hypothetical protein ASPBRDRAFT_140404 [Aspergillus brasiliensis CBS 101740]	Aspergillus brasiliensis CBS 101740	100	264	0	0	1	264	1	264	2.63e-164	466	MAPLKSLLLTASLAATLAVSTPLATDPGSLYARQFGTGSTANDLESGSCKDVTLIFARGSTEIGNMGSVIGPPLCDNLKSKLGSDKVACQGVGGQYSAGLVQNALPQNTDPGSISAAKSMFEEANSKCPNTKIVAGGYSQGSAVIDNAVQELSSDVKNQVKGVVLFGFTRNVQDHGQIPNYPKDDVKVYCAVGDLVCDDTLIVTAMHLTYGLDAGDAASFLAEKVQSSTSTSSTTSSSSDAASSSSAAGSSSGLSGLSSLFGGL
g201.t1	GAQ42927.1	GAQ42927.1 nuclear envelope protein Brr6 [Aspergillus niger]	Aspergillus niger	88.8	975	31	3	1	937	1	935	0	1670	MDKRTAESPMDFEWQTRAPGDVTSPFYQLSMQHDNQKKRPHSIFDSPEKKTMPALREPNSQPFLFSQPKTQQQPPSTPKPFFNQSAFMTPRKFDVDFSSGAENMSSPEHADNEDTPEQPKAHRNSLFSMYGRFAPSPGRGEIPRMSHYSNALARRVQKRRRRDKALDLQLRRDSDDESDRPSSSELKPTKQRQKPGQGQQETTQTGSRLTSFSDFFALLEAHPNVPSILSWWAQLVVNLSLFSLAVYVVFGFVSAIRAEFDQAAEEVSDTILAEMAACAKSYVDNRCAGGDRLPALETVCENWERCMNRDPAKVGRAKVSAHTMAVIINSFIDPISWKAIMFFLATISTVTVVSNWSFRSFRNRLNQHDYSAPPSYSRQSSGQHHPSLAPSQYPYQHNS…
g202.t1	OJJ76971.1	OJJ76971.1 hypothetical protein ASPBRDRAFT_190316 [Aspergillus brasiliensis CBS 101740]	Aspergillus brasiliensis CBS 101740	98.9	184	2	0	1	184	1	184	2.14e-119	345	MSDSLLDIRRAGAEAKRAHDHKAKWAYGSRSTLPRYSQDVHSCVLQKTRPRMPATHYTNITRAMRFQRKAATNHQISDAKIALRADVREALDSGTSESSSDDIDDPAAANKIIDDAEGKDTLRDYDVAGQTILSDAVSKAVEKFETKETERIVKEYEMISYESETALGYMADDDDFELVDRIKL
g203.t1	XP_041542990.1	XP_041542990.1 pre-mRNA-splicing factor Cwc26 [Aspergillus luchuensis]	Aspergillus luchuensis IFO 4308;Aspergillus luchuensis	90.7	345	28	1	1	345	1	341	3.38e-165	478	MSSLADYLAKNYLNADPAPDRPKKKRKKNTTKTSDSTPTGLIIADDDPPDLRSTGNNLLNDDEDAPSIVTGARTGEFRRKKTSGWKTLTSGGDGAGAEQDAADKILADAIAEREERRREQGGGDEEDDDPPVVEGMEEEDEEGVRMESGARAGLQTAAQTAAMVAAQERKKKQDAAKYKESALGDKAQETIYRDASGRIINVALKRAEARRAEEEKKAKEEEAKEALMGDVQRREKEERKQQLRDVRAMPLARTAEDEELNDELKGKLRWNDPAAQFLTSVKEGGTSRTGKPLYKGGFAPNRYGIRPGHRWDGVDRGNGFEKEWFLARNRKGRLEALDYQWQMDESQMPQRMGSPAQQDKPPITSVTGNHQQRRLEDAGLIYGGIYLTAPTDFPDRHSD…
g204.t1	GCB19371.1	GCB19371.1 protein kinase dsk1 [Aspergillus awamori]	Aspergillus awamori	97.8	580	13	0	1	580	188	767	0	1071	MDGVDITKAVLNKGKQMASSVAASATNGNGGKKRRKGTDLKPIVTNEAATLGVDPATTTNTTTEGAPAYGVPPSRSSSSSSGEELETTAEEEDSEDYCKGGYHPVSVGETYNNGRYVVVRKLGWGHFSTVWLSRDTTTGKHVALKVVRSAAHYTETAIDEIKLLNRIVQAKPAHPGRKHVVSLLDSFEHKGPNGVHVCMVFEVLGENLLGLIKRWNHRGIPMALVKQITKQVLLGLDYLHRECGIIHTDLKPENVLIEIGDVEQIVKTYVKEEAKKEQKEDNRNGRRRRRTLITGSQPLPSPLNTSFDFKHSSQNSHSSLSQMVSESSVTANADSTSMKEMLGIKDDDEKQKQREKTADLLEREVSGISLDKSQSSEEQEPECDIISVKIADLGNACWV…
g205.t1	OJJ76975.1	OJJ76975.1 hypothetical protein ASPBRDRAFT_221588 [Aspergillus brasiliensis CBS 101740]	Aspergillus brasiliensis CBS 101740	100	383	0	0	1	383	1	383	7.30e-281	770	MSSPFHRRPFPDYFLSSPLATLIYPLHQLLNHLRGPPHLPPPDARPIRVVCISDTHTLEYPDIPDGDLLIHAGDLCNDGSAREIQAAVNWLRSLPHPHKVVICGNHDSYFDSRSRLPEDRSDAPSHNNNLSSSTYATISSSTASLRSLDDYLTDDPHPRIDWGDDIHYLQHSSITLTFPPTTTSSSSSSITSTTPLRPRTLTIYGAPQIPAIVPFGPEHAFTYPPHHDAWSNTIPPSTDILVTHTPPQSRLDLSPVYSTGCPFLLSELWRVRPALHVFGHVHAAYGIERVFYDEAQRAWERLCASRKSRARLSRFSSLFGFLRDLFDLSGLVDSARVVLYGVLGVVWARVWGGENRDAGWVVNAACMYRDSGVLRNKPRVVVL
g206.t1	OJJ76976.1	OJJ76976.1 hypothetical protein ASPBRDRAFT_115218 [Aspergillus brasiliensis CBS 101740]	Aspergillus brasiliensis CBS 101740	99.8	500	1	0	1	500	1	500	0	996	MSKGKLTGAAVAEHNSKDSCWVIVHGKAYDVTEFLPEHPGGQKIILKYAGKDATEEFDPIHPPDTLDKYLDASKHLGEVDMTTVEQEEKTADPEEEARQERIKCMPSLAACYNLMDFETVARSVMKKTAWAYYSSGADDEITMRENHSAFHKIWFRPRVLVDVEHVDCSTTMLGTKVSMPFYVTATALGKLGNPEGEVVLTRAAHTHDVIQMIPTLASCSFDEIVDARQGDQVQWLQLYVNKDRNITKRIVQHAEARGCKGLFITVDAPQLGRREKDMRSKFSDVGSNVQASGGSSVDRSQGAARAISSFIDPALSWKDIPWFQSITKMPILLKGVQCVEDVLRAVEMGVQGVVLSNHGGRQLEFARSAIEVLAEVMPILRERGWENKIEIYIDGGIRR…
g207.t1	OJJ76977.1	OJJ76977.1 hypothetical protein ASPBRDRAFT_190321 [Aspergillus brasiliensis CBS 101740]	Aspergillus brasiliensis CBS 101740	99	293	3	0	1	293	1	293	6.04e-205	571	MSSSLEAKIVVLGAQGVGKTSLVDRYVKNDFSPSATASTVGASFVTKRVLDSSSDTIVRLQIWDTAGQERFRSISRLYYRGANACLLCYDITDEQSFQEMTGWLAELKKNLCEDDPIVIHVVGTKTDIVTLDPSRRRVPFERTIAYVAEQLYPTQASTPPATAGLGGHSSSTLAGVDSKRSSAFWGQDIGWDCCHEISAKDGEGIEEVFRVITRKLVEQRNKREAVTSSSQRSSTIFDGTTSSLTPGNFDGNGSFRLGYGDKRRSWLGLPPSSVGDELDDIVEGPKRKGGQCC
g208.t1	OJJ76978.1	OJJ76978.1 hypothetical protein ASPBRDRAFT_36154 [Aspergillus brasiliensis CBS 101740]	Aspergillus brasiliensis CBS 101740	99.4	342	1	1	1	341	1	342	1.45e-250	690	MRLSYRIGAAALIILAIVLIKRHLDLVQDDARVQSGWSFSSFSAESAAGGSSNNVNSGGNANNDGVSTPKNSKPILTGSDNSNSNGKTKGSSDSAVSRPLYETTPIIVPNDRVIVMAKLSTEDTSWVSNDLAEWRNVIYTVDDVTAPRHTPKNKGRESLAYLQYIVDHYDDLPSTIVFIHSHKDGWPGAWHTDTMAYSNVDSIRALQTDFVQRNGYVNLRCQQTPGCPDEIRPFRDPPQFGKTAERVYAQAWVELFNNTDVPDVVGVACCSQFAVSREQVLKRPLEHYTWFYDWVLNTGLSDDLSAHVMEYTWHIIFGKDPVYCPDAYQCYQDVYGNPYFW
g209.t1	KAI2882828.1	KAI2882828.1 hypothetical protein CBS11852_9497 [Aspergillus niger]	Aspergillus niger	89	1470	103	1	1	1412	1	1470	0	2533	MSEPNSRRPFHVIIVGASIAGLTLAHCLSNTGIEFTILEARSDTYPDGAGLVILPNGARILDQLGLYQDVLDQGQCMVSHSTWLGTGHLLRRVDAGRIRYLRRTDYPVLIISRRTLLSILYTRLQRSRLFFNRRVVRVVSSPDKVTVHSADGLSVSGDLVVGADGVHSTVRKQMWHHIRKVHDANSSSRWLFEVPLTDSFAGIFGVAQSIPGLDRGDIHRTYGHGWSMLLMVGADCRVSWFMSISRIMMPGLVPRHTSDRACVSRIVEPFLEKHVTSNVTFGEVFNRSDSCIMVSLEEGFQNRWSWSRFVGIGDAVHKMEGKSGVSVNAEATRLRWQEADEETGVPARRDPPQLSRTTSVASNSSARSRARRATVDPSLSLPIHYRTVSFDIDEARDRE…
g210.t1	OJJ76981.1	OJJ76981.1 hypothetical protein ASPBRDRAFT_221751 [Aspergillus brasiliensis CBS 101740]	Aspergillus brasiliensis CBS 101740	99.7	338	1	0	1	338	1	338	1.63e-227	632	MPAQMDALGAFTHLTENIPSWIDRLAELSAHTAAKHAEYAEAYRRHVTVRPRRRKNSSVCSIRTQDLRSSAPETETRPQSSAAATNTTVTTPNVSQHQANVNPRKRGAEDAPSMESRDRNPLVSTRHNLIIHYDGHTQHVLEEMVRHIGTARNNIRKGRMSQLPLPGYRSKMLDRSARMNSLAPSLSPSESGEDDVLSSIRKARNRGPPVPRAREMPRESPFDMAEKQLELVHGVCETAAYQFLRSGDCSTELTSVEGKFKSLLDLATNEVRRLKAEHPEDLTVEEDKAEAPALESATTTIEVDRQSLSKMDTIEVDDSAQSVESIDLTAFRANRLRR
g211.t1	OJJ76983.1	OJJ76983.1 hypothetical protein ASPBRDRAFT_24694 [Aspergillus brasiliensis CBS 101740]	Aspergillus brasiliensis CBS 101740	99	289	3	0	1	289	35	323	5.18e-150	433	MAKQEISDSQDDTALKDIPSAESSPQQDNPEVASATAKAPSDPQSPPAPPSPQVPPSPQAPPAPPKKTSKAIKKIKKMDTSSSSNNSTQKERLTPACAPCKKAKRRCPHRTVMPEVEEQGVSQSATKKRKQTAGPKANSKRAKKNDGDVSGDNDTGSEEGQRLKLKFKNVEFTAETGETGESSAPKKRGRPSKAASTDAEVGALSTIEEDDEEEDVPRKRAQAKSYRFPKDAIEAASRLAAYKQLDMQLQSKIEDCDNKWAVVKQTIGEVRYILEKWTELWREGKTPDE
g212.t1	OJJ76984.1	OJJ76984.1 hypothetical protein ASPBRDRAFT_112346 [Aspergillus brasiliensis CBS 101740]	Aspergillus brasiliensis CBS 101740	98.5	260	4	0	1	260	1	260	8.61e-168	474	MPRPAPYLPLLTTHLTSSPTSTSITLTTLSTPPLSKTPLPRSRTVEFRGFFPSLNLHSSAIQSLKDQHIGLNPDIYESEMIALTTDKRMEKVQELESSGGVVEAVFWLREVGNQWRVRGKGVIIGDDIQGEKEREAREFVERGLRRKDTTTTGDGDGDGEWSWERQVDMYFANHSPGMRGSFKNPPPGTPRSQQPENPELKLGQKVEDLKDKVARENFRVVVIRPEEVERLDINDPSNPIRTRWTAVRDGEEWEEVDLWP
g213.t1	OJJ76985.1	OJJ76985.1 hypothetical protein ASPBRDRAFT_70526 [Aspergillus brasiliensis CBS 101740]	Aspergillus brasiliensis CBS 101740	100	253	0	0	1	253	1	253	1.29e-170	481	MRLTVELIQNSLSYINPLKDRELDLRGHKIPAIENLGIAKDQDAIDLTDNDITSLGNFPFFPRLRTLLLARNRVKQIQPTISSSVPNLSALVLTANNMNELADLDPLRNLVNLTHLVLLENPVTRKEHYRYYVIWRIPSVRFLDYQKVKDAEREKATELFGTAEEPSALASKIMGIKSRTFDVPSGAGAADRGAPADKAVRVKLTDKERKRVEKMIREAKSLQEISRLEKELNEGRIPGGALDYADSDEEMQT
g214.t1	OJJ76986.1	OJJ76986.1 hypothetical protein ASPBRDRAFT_49982 [Aspergillus brasiliensis CBS 101740]	Aspergillus brasiliensis CBS 101740	100	697	0	0	16	712	8	704	0	1416	MGKHRYGVVLDAGSSGTRVHVYRWLDNAVAREKGEHLQTLPEVKTKSDWTKKIHPGVSSFANKPEEVGPEHLAELLEHAKEIVPEDAVKDTPIFLLATAGMRLLPDVQRNLLLEQICSYVGSNSDFLLPDCGVHIQVIPGVTEGLYGWVATNYLLGSFDSPGSHDHGKGHHTYGFLDMGGASAQIAFAPNATESEKHANDLTLLRLRNVDGSTQEHRVFVTSWLEFGVHEARRRYLESLQAASAVGDVQELPDPCLPVGLRTTIDGKLLSTDDVDGMHLLGTGKFDECLRQTYPLLDKDAPCPDQPCLLHGMHVPAIDFDVNHFVGISEYWHTTHDAFEMGHKDKAYDFATYQERVQAFCSQDWATVENGLEAHQWGKKFDRESAAEICFKASWIMNVL…
g215.t1	OJJ76987.1	OJJ76987.1 hypothetical protein ASPBRDRAFT_165526 [Aspergillus brasiliensis CBS 101740]	Aspergillus brasiliensis CBS 101740	98.9	474	5	0	1	474	4	477	0	941	MSEPVYNSSTPEGGDPTQVDVNAQYTGFEYNYVYITTCTFIVFLILPGIGMLYSGLSRRKSALSLLFQAFMVLAVSTFQWLFWGYSLTYSRDGGPFIGTLKNFGLMDVLVAPSPGSAVLPEVVFCLFQLLFCACTVMIVVGGAFERGGIVPSLIFSFFWATIVYCPLARWTWSSNGWLYNLPAIDFAGGGPVHIASGCTALAYALVLGKRRDHGDPSLRKPHNTTLVFLGTVMIWTGWLGFNGGSSLNASMRAMVAVFNTNTAGCTGILGWVLVDMIRYKGKFTLVGACEGAIAGLVGITPAAGCVSLWLAACIGFITSIVCSSLQNVNEWIHVDEGMDVFKLHGLGGMVGAFLTGLFASEKISALDGSTLSPGAIDGNGVQVGKQLAEICAIASYSFV…
g216.t1	OJJ76988.1	OJJ76988.1 hypothetical protein ASPBRDRAFT_36168 [Aspergillus brasiliensis CBS 101740]	Aspergillus brasiliensis CBS 101740	98	546	11	0	1	546	1	546	0	1077	MSSSTMGVQETAPKKRTRVSHTKVRTGCRTCRIRHKKCDETRPICRMCSSTGRICDGYQQTIDRRTRASRLRLASTSPSSTSSSSSTVSVQSPVSDLILHSNQIDLTRQERWYLDFFRRNTAFQCSGYFDDDFWLRLVHQVTEAEPAVRHAAIALSALHCNFERTSTGQGTIDSRLPLQQCVKAISSLRHQLAGGGVPSRSNMEITLVTCVLFVSFMFLQGDTHSGCCHLRGGLKLLKEWRTTDMPGYSTTGAVLMKVFARLQLQWSTFADKVFIDEVDSNRLDVPYMEINDLSLEEPTDSLEKAGSLLVSLGRLVLTPHPSGTSSPGYCTVLDSRRMTILNKLQHWTTELDNSMTCTLLLRDNTILTVLKLWSEVIYIMAATETRLGGSETRFDAFHL…
g217.t1	OJJ76989.1	OJJ76989.1 hypothetical protein ASPBRDRAFT_202050 [Aspergillus brasiliensis CBS 101740]	Aspergillus brasiliensis CBS 101740	94.9	919	43	1	1	915	1	919	8.87e-309	885	MPLFNAKSLLAGLCAASIVSPSLGLPQSSHPGSSAVAGSSESHPSWTLESGSTATTISSLNTPSYSPSSLVTASLGATQGASTDGAHDTSASPFTPSSSQSYTTILSSASAGVPAQGRTTSSSRSRSVISKETSTRSPSSLFTPSASTETPISPSQTPTHTHSFTHTSSSSDHASSESATSSHPVSTSKHTHTHTPTSSASSSDIQKGSSASTQHETSSSSSAPVRSQTPTVSSPASSKPNTSSTTKTHTTHSRTEDTTSSSAPHTTSKSSSSSAESASSSLASPSPTSSIHSITTTTNTDTSQSATITPSPSTTPNSTIATTSSTTTSSVDVYALIKHLYKLVKDTYPVIKKWKQDPKSVKASDLIKPLKRVIPVADDVLDVLGAPSSLSSSSGDGES…
g218.t1	OJJ76990.1	OJJ76990.1 hypothetical protein ASPBRDRAFT_60657 [Aspergillus brasiliensis CBS 101740]	Aspergillus brasiliensis CBS 101740	95.4	345	14	2	1	344	1	344	6.12e-225	630	MSDRAVHSLGHAKTFDEALAAINKGVSRALPSKDLYNEVVVLSLRWENDDLGRKDIEIELLQLFEREYLFKTDSLLIPCATKREAMSAIHMKLRTMRSSFDSSDTLFIVVYEGRSDAYYRLPSVSLGVMGSVKTAVSVPWSFVVSQLATANGDVLFILDTGFPPEAAWGYENFEYLAAASALKPPAAANIDVSLTRQLINLLSQEETGITIAQLYAKLVVHANRPGSQLDHTPVHVAARDRPSITLRRLEALPRELRSDLSDGKVLVTVRISGRTSVPDVGQWIQWLSTSISEVADIKIEGLFKSDSSLLLLTMPVAVWSMLRHNDSFDFVSVVQSHNLLCHQSTTTFPSALASSSGNIDLPYRSKD
g219.t1	OJJ76991.1	OJJ76991.1 hypothetical protein ASPBRDRAFT_115000 [Aspergillus brasiliensis CBS 101740]	Aspergillus brasiliensis CBS 101740	98.8	339	4	0	1	339	1	339	1.18e-241	667	MGPQQWFRKRNPDGQTAPMYRSSHSQLPMLHMADTVRNNFIAAVGEFVGTFLFLFFSFAGTQVSNTPKPAPGAPPNTSNLLYSSLCFGFSLMVNVWAFYRVTGGLFNPAVTLALCLVGGLPPLRGVIVFAVQLIAGIASAGVVSALFPGALNVGTRLGGGASISQGLFIEMFLTAQLVLVIIMLAVVKHKSTFLAPVAIGLVFFVTEMVGDYYTGGSLNPARSLGPDVINRSFPGYHWIYWVGPLLGSLLACGFFTFLKMFQYTTVNPGQDYNEWEAKMGSGGPGSWDMSMHRPSYNSEATTVEQPQSPITGRRNHTPANSQPQNDPNIPNIPHGAEQV
g220.t1	OJJ76992.1	OJJ76992.1 hypothetical protein ASPBRDRAFT_49986 [Aspergillus brasiliensis CBS 101740]	Aspergillus brasiliensis CBS 101740	99.3	417	3	0	1	417	1	417	4.58e-299	819	MGLTQEQTDIIKATVPVIKVHGNAVTSVFYKNMLAAHPELNAIFNSSNQVNGHQPRALAGAVFAYAANIDNLGALGPAVELICNKHASLYIQPEHYNIVGKFLLEAMGEVLGDAFTPAIKDAWAAAYFQLADIMINREAALYKEADGWTEFRDFRIARKVPESSEITSFYLEPVDGKPLPSFRPGQYISVQLFVPQLDHPQARQYSLSDKPRSDYYRISVKKEAGLNATKPGAEAHPGLVSNILHDLKKEGDIIKVSHPQGDFFLSDAEKQSSSPIVLLAAGVGLTPLTSILNTVLESESETQRKISFVHGARTSGARAFKPQILELATKVPNLQAFFFTSHPAAEDQQGEDYDFAGRLDLSKLDANKVLFLDDATTQYYVCGPESFMLDVKGKLAAEG…
g221.t1	OJJ76993.1	OJJ76993.1 hypothetical protein ASPBRDRAFT_114852 [Aspergillus brasiliensis CBS 101740]	Aspergillus brasiliensis CBS 101740	99.7	613	2	0	1	613	1	613	0	1233	MLFSLLSQGAAVSLAALSLLPSPVAAEIFEKLSGVPNGWRYANNPQGNEVIRLQIALQQHDVTGFEQAVMDMSTPGHADYGKHFRTHEEMKRMLLPSDTAVDSVRDWLESAGVHNIQVDADWIKFHTTVTKANALLDADFKWYVSEARHIRRLRTLQYSIPDALVSHINMIQPTTRFGQIQPNRATMRSKPKHADETFLTAATLAQNTTHCDSIITPSCLKQLYNIGDYQADPKSGSKIGFASYLEEYARYADLEKFEQHLAPNAIGQNFTVVQFNGGLNDQLSTKDSGEANLDLQYILGVSAPLPVTEYSTGGRGELVPDLSSPDPNDNSNEPYLDFLQNILKLNNSDLPQVISTSYGEDEQTIPVPYARAVCNLYAQLGSRGVSVIFSSGDSGVGAA…
g222.t1	KAI2882840.1	KAI2882840.1 hypothetical protein CBS11852_9509 [Aspergillus niger]	Aspergillus niger	72.4	898	174	5	149	1045	1	825	0	1283	MSRARRESFQALKKWVFDRNSQVAKIAAGQGIAGTRAAPSQSGSNDSKIGSRLDNGEKFIKDGKEYKRYKWQINKNAENATLKEIASKDSHKVWAEADLPITSDNSSAKAKVSQLFDDLEETVGFKFSECVHIEKFSDGMFNKAFLFTMQDGTQVVGKVPNKNAGRPHYTTASEVATMDFVRTELSTPVPKVLAWNSKASENPVGAEYIIMEKVGGVQLDKIWPQMDIKERFELVKTISRYQKAWMSKSFTQYGSLYYSSDLQDHRGCIIVDEDGSQSKDNRYAVGPTTGREFLDDGRIDVEFDRGPWNNLLEYKLAIGSRELACVQNMTQLPRSLLGLYGPGTYRPSRSKKIAAIQDYLRLVQFFLPTDNSISSAFVWHPDLHTENIFVDPERPSEVL…
g224.t1	XP_025510955.1	XP_025510955.1 HLH DNA binding domain protein [Aspergillus piperis CBS 112811]	Aspergillus luchuensis IFO 4308;Aspergillus luchuensis;Aspergillus luchuensis CBS 106.47;Aspergillus piperis CBS 112811	96.2	319	9	1	1	319	1	316	3.94e-211	588	MAYPRPDSFTLDDERMYSMSHPSPLSRPNDTFAKGPDPLSANWSYDNAIDLFSLNTMMPETFPLEMSNEMMNLDPKDFPADFFAPPPDISAFTISNHSGEDAASCGSLSSDLDSDDQSWSPTCRVSPIDPIHMELPKPAARTSKTSTRRKTTSQPKPREVTATRWSSSPEITPQDYPATSVSPPPAPSSPVASNTTTTARKTTRSLSSDSNASTGQAQTTTGRNAAKRAAHNIIEKRYRTNMNAKFVALEKAMCGGVQKPTKGGSASLKKSEILTNAITFMQELQEENKALQKELAMLKQGMVPNGMWRHSKGSEAFHA
g225.t1	OJJ76999.1	OJJ76999.1 hypothetical protein ASPBRDRAFT_49991 [Aspergillus brasiliensis CBS 101740]	Aspergillus brasiliensis CBS 101740	98.1	310	6	0	1	310	1	310	3.84e-217	610	MAKIGVFPAAGGLGTSIINHLVKLVPASELILIARKPDNLAELTRAGATVRRADYEDPATLERAFDGVGILMLISYASFEIQFRFEAHKNAIDAARRSGVKHIFYSSLAFAGNLEETSVAHVMGAHLRTEKYLAEVSGHFTYTAIREGLYSESYPIYTSWFDIHNPADEIAIPHSGDGPGVAWVKRDELGEATAKLIAGYAKNPAGFPYLNRVLLLSGPREISLKETVEILGQAVGKPLRLREISVDEYVALPQHGSKHTYHGINLTREWATAWDAIRRGETAVVSPLLGEILGREPESYETTIKAMALNLEVLCGVMPLFTGIPSAEVDENLVAPGTPGVSCIGNDLTGDMLQGQLPDQPESSHENKSNPIISGEMIGQRGPSITRGAQQAYGRRREE…
g226.t1	OJJ77000.1	OJJ77000.1 hypothetical protein ASPBRDRAFT_49992 [Aspergillus brasiliensis CBS 101740]	Aspergillus brasiliensis CBS 101740	94.1	512	30	0	1	512	1	512	0	991	MSPSSKPNIFTYSKFDPEAVCRRASALRQGIPCTCDSDQRPASGSFNWAIFIHFEDGLQWVFRSPHSRTFMPLEIGVKLLASEAATLRYLKAHSDIPAPEVYDYCASSDNDTKVPFILMSQAPGWQLSKVWVSAGSPLPDLDPFRKAKVLDQLGGITWKLSQLRLDRIGSLYEEDGAFQIKECLWRCYMLHERFLIEGQHGPFATDAECYDSLVSAFLEHVESLRLSHHCFVAPVPSRQDYQSDKQYRSAVDLWNDFVAVGDKIDSADNRLDYIVAGNALRDIVRKLEIPAVDPRSFPLCHADLSVNNIYVDDDYNITCIIDWAFTSSVPESLLLAPPGLPQYGNKISPELHAAFINGFMVAMPESTEERMQRRYRERLEQGHFYWNLSRLLGLDTIND…
g227.t1	OJJ77001.1	OJJ77001.1 hypothetical protein ASPBRDRAFT_24712 [Aspergillus brasiliensis CBS 101740]	Aspergillus brasiliensis CBS 101740	99.6	536	2	0	1	536	3	538	0	1079	MDLENNGPIKPIQSVDQSVQDAHDLAAMGHDQAMTRKFDVWSMLSLAFCVLGTYSTFAQDLDSGLTNGGSVTILWGLVLVTACNLCVAVSLGELTSSMPTALGQAYWVFRLWDTPLGRFVSYMCAWINMFGWWTLTASQVAFMAEFLLGMKVMFDNSWGGANTGWLNFIVYIGTVLVLTVINLVGCRKEKVLPWLNNFVGIWFTGLFVVLSLALLISVGVKKGLSFQPASFVFGAWMNETGWGNGVVWFTGLVQAAYGLTAFDAVIHMVEEIPAPRRNAPKVMWLSVLMGAITGFIFMVVCLFCIQDVNEVINSPTGLPFMELMVETVGLEGGATLIALFIFNGLGQGISILTTASRLTWGFARDGGLPWSGYLMLVDPVWKVPARALWFQGFWIALVG…
g228.t1	OJJ77002.1	OJJ77002.1 hypothetical protein ASPBRDRAFT_36188 [Aspergillus brasiliensis CBS 101740]	Aspergillus brasiliensis CBS 101740	98.5	1357	11	1	1	1348	1	1357	0	2657	MDTSSSSGTVDIEPGNSSIPKQLTLTWRNVSVNVTAPDAALGDTLLSVADPRQFLGWFSKSQRPKRTILKDISGQLRPGEMLLVLGRPGSGCTSFLRVISNDREAFDEVVGETRYGSMDHKQAKKYRQQIMFNNEDDVHFPTLTVNRTMKFALRNKVPRERPEHLNNRKDYVQEKRDGILESLGIPHTKKTLVGNEFIRGVSGGERKRVSLAEVMAGQSPVQFWDNPTRGLDSKTAVEFARMLRREANENQKTIMATMYQAGNGIYDEFDKILVLAEGLVTYYGPRALARRYFEDMGFICPKGANIADFLTSVTVITERIVAPGMEEKVPNSPAEFEARYRQSAIYSQMMNDIQPPEKLVNEDENLALAVAMEKRKQHVPRPQSVYTAGLWDQILSCTL…
g229.t1	OJJ77003.1	OJJ77003.1 hypothetical protein ASPBRDRAFT_36189 [Aspergillus brasiliensis CBS 101740]	Aspergillus brasiliensis CBS 101740	99.6	273	1	0	1	273	1	273	1.63e-183	515	MVNFTLDDTATNSPTGLTRHLNTTVEEYVFPILIALSWCNAIELVILCLNTFKRYTGTYFWSLLIASLSIIPFSLGYLLKMFGLTFSNYFLEIAIVGVGWIGMVTGQSLVLWSRLHLVLHQKKMLQGLLYLIIFDGILLHSASEGLEFAVNAMPDSQSVNIAFGVMERVQLVWFCAQELLLSGLYIRETARMLRMDNGELSRSVLVQLLLVNVVIIVLDLSVVGIQYAGFFTFQVTFKALVYSIKLKLEYVILGRLVDVAYVRSQTDTPRFRF
g230.t1	OJJ77004.1	OJJ77004.1 hypothetical protein ASPBRDRAFT_36193 [Aspergillus brasiliensis CBS 101740]	Aspergillus brasiliensis CBS 101740	95.4	283	13	0	7	289	1	283	1.43e-179	506	MIPTKKMDLTGRKPLYRLSATPAPPTHPQSPTAKPVNQTPTHPAPQHPPWQQSPPHPYPVPSPHGQPPHVLSPYNETTHGADMQAARRRGRMLFENELIILFKKCIERKDMYLTNQNRSAFWDNVAGYMNSFTGRNFSPPSYQQIVTDRSIERRTRRRDIASGMAQTELPNALTTVIDQWIAMEDQLLKQTSENEALSHKRPAPDDLSAEDFNQAKRLRPPTADSPQATPSSPSQARREVDGNSLARVLVQEVRDLRREVGEVHRKLDLVLEVLRGIKEIPDNVNSEER
g231.t1	OJJ77005.1	OJJ77005.1 hypothetical protein ASPBRDRAFT_190347 [Aspergillus brasiliensis CBS 101740]	Aspergillus brasiliensis CBS 101740	97.2	399	11	0	1	399	1	399	1.44e-286	786	MAPTFRAEQIGSLMRPKELLAARNAAGLAHIYTRTNVPEDVQQMTKQAIAKVVEQQQAHKVRPLMTGEFERPIFYAGFFENLEGLEMTKVPIPDGYRTGLPTVRTLEKLGVKERDACIAVGQIQHVRSPYLADWEYLRSLVPQEQWKECKMSMPSITWQHQHLRAGTAFTTSSPYTTDKEYFADLAKAFAQEYRILYDAGLRSIQVDDPAMTFFVTDEMRSGCLADGIDPDELLDLYIWAHNESLRDRPADLHVGVHLCRGNMPGSTHVLSGSYERIARRMFTGLDYDTFYLEYDTERAGDFQPLRHLPVGKNVVLGVVSTKTAELEPVEELQARVYEAAEVIAQGQGRSRQEVLDSSLGVSPQCGFSSVSHGRGIGMTEARMWEKLQLVQKVAERVWP
g232.t1	OJJ77006.1	OJJ77006.1 hypothetical protein ASPBRDRAFT_112915 [Aspergillus brasiliensis CBS 101740]	Aspergillus brasiliensis CBS 101740	98.7	300	4	0	1	300	1	300	1.80e-205	573	MHFPLAALTLLPLTTHAINIISSNDDGWAEINIRTLYDALTAADHSVVISAPAENESGTGSDDATPTPLTSACEFNSCPSGSPAVGYNATQPRFNYVNSYPATSMKYGLNNLSSEFFSGSSPDLAVAGPNVGANLGLAVFFSGTVGATTYAANQGIPAVAFSGSTGSQTAWNVSTVPTYSTVYAELATKLVDELVESGTPYLPEGVWLNVNFGDVSDDSCTSADDFSFVLSRIFTAIPLITADDVETCNSTRLPTETKVMGVDGCWASVSVGMAGDKLDANATVQGVVLDKLSGLLTCLD
g233.t1	OJJ77007.1	OJJ77007.1 hypothetical protein ASPBRDRAFT_36194 [Aspergillus brasiliensis CBS 101740]	Aspergillus brasiliensis CBS 101740	98	248	3	2	1	247	1	247	9.88e-172	483	MSLRTLLLAASTLSATASASPAGKHLSTRDWIASDEIVGFNQTVPDNSTGDLYLAYQPYLKVVNGCVPFPGVDAEGNTDAGLAPTGASDGDCSSNTGQIYVRSNITTDSTSTYPTALLYSWYMPKDEPSTGLGHRHDWEGVIIYLSDSTTISADNILAVCPSAHGGWDCSTDGYTLSGTKALIKYESIWPLDHSCGLTDVVGGTQPLVAWESLTTAARDALQTADFDKAIVPFKDSTFDENLAKATY
g234.t1	OJJ77008.1	OJJ77008.1 hypothetical protein ASPBRDRAFT_223028 [Aspergillus brasiliensis CBS 101740]	Aspergillus brasiliensis CBS 101740	95.8	407	15	2	1	407	1	405	6.21e-248	689	MRQAQSASLLAALLSATQVAAHGHVTNIVVDGVYYEGFDINSFPYESDPPKVAAWTTPNTGNGFITPDDYANPNIICHENATNAQAHVVVGAGEKINIQWTAWPDSHHGPVLDYLARCDGSCETVDKTDLEFFKIDGVGLVSDTEVPGTWGTDQLINNNNSWLVEIPPTLAAGNYVLRHELIALHSAEEEDGAQNYPQCFNLQVTGTGTATPTGVKGTELYTATEAGILVNIYSSLATYTVPGPTQFSGAVSVTQSTSAITSTGTAVVGSASAVASASSTAAATTSAAAAAVTSVDANTQVAQASTPAASSSSAYTQIPVQVPSSWTTLVTYTPQAVQPTTSVDPVPAQSTITPAPAVSSAASGSSSGTQSEYGQCGGINWTGATQCASGSSCHSYNPY…
g235.t1	GAA87039.1	GAA87039.1 similar to An08g09690 [Aspergillus luchuensis IFO 4308]	Aspergillus luchuensis IFO 4308	74.4	234	59	1	1	233	1	234	1.10e-123	363	MPSRWFAQSEISPGAVLQLEKSWTVISACEEHISQYAKGQGNRHEPPASDATIRLISKQTDGNILSDIRIYKQIPAAGTEAEPAAVRAKQARTCEPDELIALRALTNKGSKFTPRLLDSKSITQDDSGVVPGGFLVYVAWEVVAGEQLGTQVEDENCAFWRLDPGQRDIVRQHFKNNYLQLCEWGYMPFHGGLSHLVWDAESSTLYFVGFYMATIDSKKKWSSLVWFAWGLSKHLPSLAKFFSFEEEPWTNCAVEAELNEVFKMPLERAQNWLDAAEEKAFRGLPGCLARV
g236.t1	OJJ77012.1	OJJ77012.1 hypothetical protein ASPBRDRAFT_24722 [Aspergillus brasiliensis CBS 101740]	Aspergillus brasiliensis CBS 101740	99.3	611	4	0	1	611	1	611	0	1255	MGDKKSDPENPTSEVQHFESFTSMEKQDVEVARDWSRNLAESKNVTTSTKQKNPLAGLTRDELFRDVESFARDKRLEHIMDELKRGSLVAQDPKAFESLDELSEGDKELLRREKTHRWSQPFMMYFMTILCAGSAIVQGMDQTAVNGAQEFYFAEFNLTNRWQQGLLNGAPYLCSALIGCWTTAPLNRWFGRRGCIFISCFISFASSFWMAAAHTWWNLLLGRFLLGFAVGAKSTTTPVYGAECSPAIIRGALVMMWQMWTAFGIMLGYIASVAFMDVTHPTIPGFNWRLMLGSTAIPPFFVCMQVYFCPESPRWYMMRNRYQDAYKALCKLRPSPFQAARDLYYIHAALQVEERLREGKQLWREMFTVPRNRRAAQSSFFVMFMQQFCGVNAIMYYSS…
g237.t1	GJP93629.1	GJP93629.1 ribonuclease III domain family protein [Aspergillus niger]	Aspergillus niger	54.4	228	51	5	1	175	1	228	2.61e-67	216	MATAQQTNIWATLTTFFFPMNATSTSGVDTGWIATALLVGMKAVVQKYSGNGQTGAGVVHNFINTTALIHDWHFVQTVNQPVKMKCLAAKELEPRATTSHLEEIDFSWTEQSGSGTMTQTGLERAVQRESQFVASQPNGTYSFCADAYSVDGVDAVVGFHLYGDNYAIDFPPPCDQVLSLLVITCTYDRYVFY
g238.t1	OJJ77014.1	OJJ77014.1 hypothetical protein ASPBRDRAFT_70546 [Aspergillus brasiliensis CBS 101740]	Aspergillus brasiliensis CBS 101740	99.6	466	2	0	1	466	1	466	0	895	MAHPTGDKVDSHLNVQTGQFFQGGREDPYLHDAEEKQDEKKDSPVYNDTFGDEEYAEVKYKVLSWWQCGFLMVAETVSLGILSLPAVVATLGLAPAIVLIVGLGLLATYTGYVIGQFRWRYPHVQNLADAGEILFGPIGREIFGIGQLLLVIFIMASHLLTFSVAMNTITEHGTCSIVFGVVGLVICYLLSLPRTSANVSYLSVASFISVFSAVMIVMIAVGIERPYKGSLQATVDTSLYEAFLAVCNIVFSFSGHVAFFGFMSELKDHREYPKALCLLQGLDTILYLVTSVVIYIYAGPNVTSPALGSASELVAKVAYGIALPTIIIGGVVNGHVACKYVYVRIFRHGDRMHSRDLVATGSWVGMALGLWIIAWIIAEAIPVFNDLLSLIASLFASWS…
g239.t1	OJJ77015.1	OJJ77015.1 hypothetical protein ASPBRDRAFT_190355 [Aspergillus brasiliensis CBS 101740]	Aspergillus brasiliensis CBS 101740	100	535	0	0	1	535	1	535	0	1062	MSEVPTFAGLSGRKLIWSVTSCATLGFLLFGYDQGVMSSIIDADPFNDIFTATRDNSTIQGVVTAIYELGCLVGALFILACGDWLGRRYSIMLGATVMIIGVIIQVTSIEGHVPLAQFCVGRVITGVGNGMNTSTIPTYQAECSRTSNRGLLICIEGSTIAIGTLISYWVDFGASYGPDDLTWRFPIAFQIFFGLLIILGLLVLPESPRWLFTQERYEEGERVIAALQGKEISHHEVQLQKTIILDSLRASGMATKSTPLSAVFTGGKTQHCRRMLLGCSSQFFQQIGGCNAVIYYLPVLMQQSLGQTEFMAMILGGVNMIVYSIFACSSWFLIQKVGRRKLFLVGSFGQSASMVITFACLIPGGTEAAKGAAVGLFTFIATFGATWLPLPWLYPAEIS…
g240.t1	OJJ77016.1	OJJ77016.1 hypothetical protein ASPBRDRAFT_50004 [Aspergillus brasiliensis CBS 101740]	Aspergillus brasiliensis CBS 101740	94	712	41	2	396	1106	15	725	0	1267	MSTTSALPPPPDGGFHAWAQVVSGHLVVAVTWGYAASFGVFQDHYDTTLTQTSSDISWIGGFQVFCLLFISPLSGRATDAGRARLVVSIGAFLLLLETFMTSLATVYWELFLAQGLCIGIGQGLMWLPSVTLLSTYFVRRRVFAVTAAATGTSTGGIIFPAMIQFLSPRIGFPWAVRCMGFVVLVMLLIILALLRPRLPPRKSGPLIEWGAFTEPAYMLFTLGVFLLYWTLYFAFFYIQVYATDKLGLSAQAGVNLVIVINACGIPIRAPCGYLADRYIGPLNCLIPWVGICGILMFSWAGVHTVAGLYIFAVFYGLASAAAMGLFAGTVPSLTKDLDKIGTRVGMALAMMSFGPLTGPSVAGALIAQSGDDSYLPAQLWAGAALMVGALSLVGARFVI…
g241.t1	OJJ77019.1	OJJ77019.1 hypothetical protein ASPBRDRAFT_24729 [Aspergillus brasiliensis CBS 101740]	Aspergillus brasiliensis CBS 101740	93.3	239	16	0	1	239	1	239	9.78e-159	449	MKLSVTLSMLAVTAMGQTMCSQYDSASSPPYSVNQNLWGEYQGTGSQCVYVDKLTSSGASWHTEWTWSGGEGTVKSYSNSGVTFNKKLVSDVSSIPTTVEWKQDDTNVNADVAYDLFTAANVNHATSSGDYELMVWLARYGTIQPIGSKIATATVGGKSWEVWYGTSTQAGAEQKTYSFVSDTPITSYSGDIKAFFDYLIQNQSFPASSQYLITLQFGTEAFTGGPATFTVDNWTASVN
g242.t1	OJJ77020.1	OJJ77020.1 hypothetical protein ASPBRDRAFT_24730 [Aspergillus brasiliensis CBS 101740]	Aspergillus brasiliensis CBS 101740	93.9	213	13	0	1	213	1	213	6.85e-134	385	MNLNLWFFTLFTLALNLLGHSTSEQDADHSITGTTSTPPNISITAPAQASIPPPSIPNPDSGLNNLLLLLQRLNEQAVALQKTLSTIKLDKSSIPSIRAQTQAITATGDASIAQALALDYLGTLDSTRVSLKTVALKPLFGHLLTIIKNKKIPICEMEYCKEMHDWIGVMRVRALSLNVAVTGIVKISEGLLIEGAWGSVDRRFPAILVEFHGPFP
g243.t1	OJJ77021.1	OJJ77021.1 hypothetical protein ASPBRDRAFT_140484 [Aspergillus brasiliensis CBS 101740]	Aspergillus brasiliensis CBS 101740	96.6	622	20	1	1	622	1	621	0	1172	MPSSSSTARANTSCRRCHRRKKRCDRTLPQCETCIQAQVECSFLDDDRQVGTYPIAYVQGLETRVKGLEKQLSAALASTPYPSFQPDCDFDQPIINFATPPDTDTSDNFLLSTPPSQNRSDFLVDELKRLSLEAAAERHLGSSSGLSFAKLTQAVLRRLSPDKAEFVFDDTPEESPVQYDESLSDPLLDASNSLWELNNSFSSPCLFSQLPLSHVMEDETVLADLQLPDRAHIEYLMEFYFAHSHTLYPIIRQTEFTSVIWRVHNNPQDPLAGSALWMFRIWMVLAIGSTTHCSVMLGDESESVLYYNKAMGYFEEALGLGDMAALEVMMLQVSYSFFNQVGPNTFFLVGVAARMAIGIGLHSSSSYANLASDVIEYRKRIFFSLYMMDRVVSIALGRP…
g244.t1	OJJ77022.1	OJJ77022.1 hypothetical protein ASPBRDRAFT_190361 [Aspergillus brasiliensis CBS 101740]	Aspergillus brasiliensis CBS 101740	76.9	507	115	1	1	505	86	592	5.88e-281	787	MKLDSQERHPYPLMLDNGEEGQFTHIMYVNTPVEVAYQRFIKDNKKTMCVEDAEGRPCECPLDVFRAWAKQEIKGLQEACSDRHIMFTMVDPSYLPRIITLIHNFELDRDGDETHNQVIFNQRIDELFGGDHKERVVLMDCDDTLATKDEEQIFWEKYYFGDGDHADEGRRQLPEEHHDWGRPREDYFQCRQACFAYEQVVAEGRFDDICRKAASASSLFPEFRTFLRRVSKYPHIRTVLVTSGPRLLWERIIAREGLSRFVWVLGSDPFSNDYVVTPSVKKNLIKRLTAVHNLQVWAFGDRQPYEYSHANEVWFGNEPMLPALASRVNESGDCLDTTSLRLIGLEQPLVLEKLFLHQYALFHMTHRTIAKYLHEELLKTGEVPIHIWRKEIRVEAAQH…
g245.t1	OJJ77023.1	OJJ77023.1 hypothetical protein ASPBRDRAFT_24733 [Aspergillus brasiliensis CBS 101740]	Aspergillus brasiliensis CBS 101740	95.4	345	10	3	1	341	1	343	2.59e-225	632	MVFKSLPNLLTTLTTISKTTQDLLSTILIAQDSHGDNPLYARTALTLASSFAPPALAAITIHQALETNTQLRQISSHLGTISDTLARDNALRVASEFPTLVYNMLQHKIKSEPSSIWYLVYHPDTIWRHHFEDLVLNRGVLGERFIGIFGSLDAVVIYMQAMRRAGVGKGRRDGEGEEVHFRVLIPAYYPITVETPVKFPVESIQPFDVYCDVHNGVPLVRMFLPGVREGELGNVGLWRPQRGFWEQLFGIGPGQDENPRLLGMQLLHDGESLALHDQSIDEGKVQQSGQQVQVQEKMRDVLAEDFVSGDEYIYEEAVGRESDDELERASTAASAGETEQHTIRHHSRRHKSRHSTASQAGSVAGSDFYSVYSWTSGQSSRSSGRRHRRRHTSRNGSDR…
g246.t1	OJJ77024.1	OJJ77024.1 hypothetical protein ASPBRDRAFT_50009 [Aspergillus brasiliensis CBS 101740]	Aspergillus brasiliensis CBS 101740	99.2	378	1	1	1	376	1	378	4.94e-285	780	MPGHFGQKILNTFGIDHHGHGQGQGQPYQQPPPPGDNRLAGNRIIHNDERLLSPHPAGTYPRLARLHDGRILASFTRFVGGGERVLMVSISHDNGQTFTDHGEISRGTGDIDNVYLLEIGPGTVLAAFRNHDIGPGGPTHFRITVCRSTDSGRSWSFASQAAEKPAPLGIWEPFMRLGRRPGEIQLTYSQEFAHNNQCTMLVRSYDGGSSWSAPQCLHGAEDQRRDGMNGIARTWDPVRNCEALVMVFETTTYGTFDVEALVSYDDGETWGGRQQVYVPPQGHNAGAPQIASLGDGSLAVIFMCDEDFREVNWTKNACVKVVFGSMPHDGRVMWTNPTTVCGDSSHWPGIFTLDDRRLLALYECGGPKAKTIALEW
g247.t1	OJJ77025.1	OJJ77025.1 hypothetical protein ASPBRDRAFT_190364 [Aspergillus brasiliensis CBS 101740]	Aspergillus brasiliensis CBS 101740	91.7	242	20	0	1	242	89	330	5.82e-164	466	MQPADCISMGYSGYICKADQDTIIKRPKQIPGDEPYNLMYHDMIITERQIYERLGNYKGIITYFGVYDESTGAIKLAYAEQGDLEAYIESHDAPSEAVRTSWIQSIVETFWYIYSSKVLHQDVKPNNILVHNGSLKVTDFGNAAIFALHADMEAICLKDPLSRVDIIGIGCIIYSVAAWRAFWYDYFEDQRWPVQEDLPETSGLLCEDIIRKCWSNSYDTIQSLYEDFNASTSTKMSSAKEC
g248.t1	OJJ77026.1	OJJ77026.1 hypothetical protein ASPBRDRAFT_24736 [Aspergillus brasiliensis CBS 101740]	Aspergillus brasiliensis CBS 101740	94.4	231	12	1	1	231	1	230	3.21e-162	457	MSGLVSSKHNPHPPSPEDEKYTEIEGINYTAGYVNQLSDDDGLLAGAWGMNDTTEIWNLCYQSGPLMSKILQDWVNSMKPLRRAHNDDEKEALVIDMQLFDWSQDMKYISILDDTESPKLDWDKVTMHNIVGITAIWTLHEMARIKPERFRYTYQYTPGERNPFKLGPYDLLHGMMLLRWVLRTWDYDQDQPPDRPRALRAKERRFWRPKSRATSFAPLSEPEDIEMMDVD
g249.t1	OJJ77028.1	OJJ77028.1 hypothetical protein ASPBRDRAFT_50010 [Aspergillus brasiliensis CBS 101740]	Aspergillus brasiliensis CBS 101740	94.4	288	16	0	6	293	1	288	6.28e-199	555	MPHSRMQLQRFSLPTAAVAPEDNWSGVTDRVVRRRVQNRLNQRAYRLRQQKNGNSSAAANNNRTLISSTSPSPQSPLPPSSTITCKLSAAEHLRCTFAPPNIHELMAEFERGALHSYLGGSPQTDMLINLSRINVLRAAYQNTVALGMTAEWLCQDDAVSIFSVYGPRRIPNGIPQSLRPTALQRAIPHHPWLDVFPFPHMRDNLIRAGDSLDDDELCHDLTAFWDTRSSDAALLVWGTPWDPRNWEVTEEFAKKWGVFLRGCPEILHSTNSWRLRRGEKPLVWERVFALVDV
g250.t1	OJJ77030.1	OJJ77030.1 hypothetical protein ASPBRDRAFT_115193 [Aspergillus brasiliensis CBS 101740]	Aspergillus brasiliensis CBS 101740	98.7	465	6	0	147	611	1	465	0	920	MAYTITVVFPNDADAQYDIDYYTNVHMKLIEKHWSKYGLKSWSVTKFLPSLDGVAPVYAVGSRVHWESEEGMKKAFESPEVAEIMGDVSRFSNKKPVFLIGETVKPALSTLTSLYAHTTTTTTINNIIIINTTIPSIPPLSEEKRKMLLTNATILTLSPTRTILTNGALRTTSNYITDIDKTATLLTKYPNDEIIDLTGHILIPGLISTHMHTAQTLLRGCADDLELVSWLCERIWVLQGNFTPRDGYAAARLSIAEMLKSGTTCFLESMFADRYGFNGLCRAVEESGIRGCLGKIVMDTGRYAKDDAWAMHPGLIEDRETSLVGTMKMWEKWNGKAGDRIRVWFGARTPGGVSPALYKEMTALSTKHNIPITMHCAEVSADRDFFSSAPGGPYTPMTY…
g251.t1	OJJ77031.1	OJJ77031.1 hypothetical protein ASPBRDRAFT_50012 [Aspergillus brasiliensis CBS 101740]	Aspergillus brasiliensis CBS 101740	98.7	473	6	0	1	473	1	473	0	941	MALNFTTFYNVINNELTSTTQTRHGINPANREPNPEVPVSTAEDLDRAVGAASRAFRKWSRTSFDERRTAIHAYADLIATNKEGLVALLSREQGKPLNQASIELDMAIQWTRSLSTITIPETIVNDTDDRQIIQRYTPIGVCAAIVPWNFPVLLAIGKIVPAIYTGNTIIVKPSPYTPYCDLKLAELAAQCFPPGVVQALSGGDDLGPMITAHPGIQKISFTGSIATGRSVMASCAKTLKKVTLELGGNDPCIVCEDVDIDAIIPKIAFLSFLCSSQICMMIKRLYVHEKIYDEFRDKLVQHVQALKMGEGTEPDVFFGPLQNKMQYDKATDLLNNIQTSGLSTFSSNTVPDRTGYFITPTIVDNPPESSRVVQEEPFAPILPLLKWSDEADVLARANN…
g252.t1	OJJ77032.1	OJJ77032.1 hypothetical protein ASPBRDRAFT_165586 [Aspergillus brasiliensis CBS 101740]	Aspergillus brasiliensis CBS 101740	98.7	521	7	0	1	521	1	521	0	1058	MGNIPDEKRQTVVQALPVGVGEEAEFAQEFTRKEHALGFWDAMRRHWPAVAWALFMNLATILKGIDGGIVKGLVGLDVFKETYGYNYHGEYVLAAQWISAFQYANLLGAIVGALCSGMAYDRFGPRVMIAVCSCLSIAFIFLQYYSHTPAQLFVGELINGCIIAFYPICASAYVGEVTPLALRGFAATMTNLAFSIGSLIASGILKGTESMNSTMSYKIPIATQWGLPCIMLALIFFCPDPPYWLCRHGRHEAALASLRRLATPAVDVSRQLAHIEETLHLEASFQADRPTYRECLRGPNLRRLLICVMAYSMQAFTGNVFFINYAVHFMELAGLDSSHAFSMNIGLTALGLVGTCLSWPLLSYVGRRTMYIFGCSALAVVQCLIGVLDVIPRDNATIW…
g253.t1	OJJ77033.1	OJJ77033.1 hypothetical protein ASPBRDRAFT_36218 [Aspergillus brasiliensis CBS 101740]	Aspergillus brasiliensis CBS 101740	99.4	343	2	0	1	343	1	343	3.85e-249	687	MSNQSLVFKQVPTGYFVPGQDVVLEQVSYDASAPAPEGGIFVQSLYASFDPYMRGRMRPAHVKSYSPAFTLNAPIDSSIIGKVLRSNNPSYKEGDLIIGFLPIQQYISVGADLLPRVRALENPLGIEDIRVFIGALGMPGLTAYSSLYEIGKPKKGETIFVSAASGAVGQLVGQLAKHEGLKVIGSVGSDEKLDFIIKELGFDGGFNYKTEKPADALARLAPEGLDIYYENVGGEHLEAALNAMNDFGRIVVCGMISQYNGGGYPIKNITNVLTKRLDMRGFIVGDKGMGDKYTKEHQENVQKWIKDGTFKTLIHETQGIENAPEGLLGIFHGKNLGKAVLKF
g254.t1	OJJ77034.1	OJJ77034.1 hypothetical protein ASPBRDRAFT_36219 [Aspergillus brasiliensis CBS 101740]	Aspergillus brasiliensis CBS 101740	95.6	458	18	2	1	456	1	458	1.05e-290	801	MKWLTLLPIALGLANASIIAFSPPTNPDIIYSLTIPNTTTLSSPGPIYIQITAPTSIQWVGLGQGAQMTGSNMFLLYTSSSTKITLSPRSGLGHFEPQYTSSTQITMLPGTGISINPDNSSSSARTTMTANFRCDNCLTWQDGTGRMDPASTNFPFIWAYRAGVPINSASMDADISIHDDMGSMQVDLTRAAMPSTDDDDNNQTNPFASYNPATDSIPAQESPNTPTGNTPPISLPNLTKMTHILISHATLMSLSFVLFYPLSALLMPLPISFPISKYNLHMPLQLFTLVMTLAGFACGIYLAYETGQLRTAHPVLGIIVVGVLVLFQPVMGWLQHRGYLKTGGRTMWGVAHRWVGRGVIVVGVVNGGVGIHVARKMGMAPVGAVVGYAVVAGVVGGVY…
g255.t1	OJJ77035.1	OJJ77035.1 hypothetical protein ASPBRDRAFT_190374 [Aspergillus brasiliensis CBS 101740]	Aspergillus brasiliensis CBS 101740	98.3	231	4	0	1	231	1	231	2.39e-156	443	MFILPKPRLKPSLFKLNNSTTRKMRLPYAPSTPPDPTDTPTTEIYTRIAARRHPRPLIPLDLSLLHSPPVADGWNSFLGAIRTQTVIDGGLLELAVCRVAVLTNAIYEWNAHAPLALKGGVKGVELSVVRTLPSLAVGDHEYDGKVEEELQKSALTEVQKAVVRYVDEMTRTVKVQDSTFERLKGVGLSDREIVELTTGVAGYNCVSRVLVALDVGENNDKEMRSVEDLEK
g256.t1	OJJ77036.1	OJJ77036.1 hypothetical protein ASPBRDRAFT_60692 [Aspergillus brasiliensis CBS 101740]	Aspergillus brasiliensis CBS 101740	96.6	555	2	1	1	555	1	538	0	1049	MSTENISSMPAGGPDSKGASTAVEDHKPTQDVSHVERVLSPTDKLKDPIDATRVDNEVLEYAARGQIEVDEDESRRLRRMIDRRVLVIMIVTYFLQALDKGTMSFASIMGIRDDAHLKGQEYSWLTTCIYIAVLIVEYPTNWIIQRVRIAKYLGFNIICWGTILALHSACHNFAGLVTVRTLLGIFEAACQPSFVVLSGMWYKREEQASTVTFWYMMNGGQQIVGGLLAYCFSLIGSGRALKSWQALFLTYGCISVLWGLFVVWWMPDSPMRAKCFTEEDKHKMVERVRANQTGLQNKKFRAYQMWEAFRDPQMYCYCAIQVFTTLPTSGLGAFANIIISGFNFTELQTQLLAMVLGFYIIIVLLASAWLVKRFNQNLLVMLGFIIPSFVGTIVLMTVQ…
g257.t1	OJJ77037.1	OJJ77037.1 hypothetical protein ASPBRDRAFT_36221 [Aspergillus brasiliensis CBS 101740]	Aspergillus brasiliensis CBS 101740	98.6	365	5	0	2	366	4	368	4.14e-272	747	MASVTSPPTVRTKIDLLITNLVNIQDKTGQFLLPLADGRIIDTKSWHGWEWTHGIGLYGIWKYYEMTGSAHLLQIIEDWFAARFAEGGTTKNINTMAVFLTLAYVYEKTRNPVYLPWLDSWAEWAMHELPRTKQGGMQHATYLTENYQQLWDDTLMMTVMPLAKIGKLLNRPEYVEEAKRQMLVHVKYLVDTRTGLWFHGWTFEDGGHNFAKAKWARGNSWVTMVIPEFVELLDLQERDPIRVFLLDTLEAQCEALMGLQEESGFWHTVLDHPDSYVEASATAGFAYGILKAVRKRYLPKKYRLVGEKGIQAVLGAVDETGELQQTSFGTPMGDTVDSYKTIPLTSMPYGQAMAIMALGEYLRGCL
g258.t1	OJJ77038.1	OJJ77038.1 hypothetical protein ASPBRDRAFT_165600 [Aspergillus brasiliensis CBS 101740]	Aspergillus brasiliensis CBS 101740	98.6	485	6	1	1	484	1	485	0	929	MATPEAPPVTSTDTSVTRTFSTWLEELTPESIPIEISTRAKYLILDGLACALLGTRLPWSVKAHDAITAIEGRGKCTMIGWNETLTPSAAALLNSTFLQGFDLDDVHIEAPIHASSVIIPAVLAAAEQEDSSTNPINGNAFLTAMVAGYETGPRVGYALGGSHMLTIGWHSGAIFGPAASAAAVSKLLNLPAAQIEDALGMACTQACGLMSAQFESMVKRMQHGFASRSGLLATYLAKQGVTGIKDVFDSSSGSFLKMYSLGAESEKKFFPEEICKGLGETWHTRKVRQKPYALMAGTHCTVDCLRVLQAKYPEKMRDWKKMVKIEAEMARAAMKKGGWHPEKPATVTAAQMCVPYAVALQVVDGEVVPAQFAPGKLNREELWQVMGMVECREVKEFDH…
g259.t1	OJJ77039.1	OJJ77039.1 hypothetical protein ASPBRDRAFT_24749 [Aspergillus brasiliensis CBS 101740]	Aspergillus brasiliensis CBS 101740	76.2	261	19	3	1	260	1	219	7.11e-127	372	MESPHQIFLIPEVLESVLLHLDPSTILLSQRVCHFWNSLIQTSPSLQTALFFRPELEPPTQNQTPERTINPFLNQLLNHFVSNHEPGHDTAVSSYLFLFGTPNKSDPSLLELKQRHAYLRPEASWRGMLLHQPPVLSLAVSDDLIPLTVEDIERKAVAFLRLKHLERLVEVCYLLPVGDLLIFYPMQHRPPWRRAPVTFLRRILNTSDTYIVPKSVLLTRLSAAGDVSVECGSAAGLRWLNGFIRRLRGWGVIKKDWESRYLPI
g260.t1	KAI2902194.1	KAI2902194.1 CAZyme family AA3 [Aspergillus niger]	Aspergillus niger;Aspergillus awamori	97.4	572	15	0	1	572	1	572	0	1151	MASTDQTWEFIVVGGGPAGCALASRLARSARRPQVLLLEAGPRKDDPSLRVDGQRWQTFMNGDLNWGYKTTPQEHCNGRQIDYSRGKVLGGSSAINFGVYTVGARDDYNQWAGLVGDDLFCWERMQARFRQLETFNGAIVDPKNSKYAAPRTSDHGSQGGLKVGYAAEWEQDLPLMMDVFEQAGLARNPDHNSGDPIGMALVINSSHQGRRVTATDLLDGAPSNLTIITESPALKLVLQGTKTVGVETKETKYFASKEVILTTGSLDTPKILMHSGLGPADQLQQFGITVVKDMPAVGQGLRDHFFAPLCFQRNPTTNDRDAFFGNPVAMESALEQWSKDGTGPWARHSCQIGAGWLKSDRLVASEEFKALPPSVQEFLQRDTVPHYEFMTHFPLHLIS…
g261.t1	OJJ77041.1	OJJ77041.1 hypothetical protein ASPBRDRAFT_114504 [Aspergillus brasiliensis CBS 101740]	Aspergillus brasiliensis CBS 101740	95.4	586	27	0	1	586	1	586	0	1150	MLVDLALLLFQVSPLVRAGLECRCQPSDACWPSTDDWQHLNESISGHLVRVYPIGHVCHEPFFNQDSCDQVVHMQYDSNWRAGQPGALQSFNWENWPEENESCTVEANPNLACGQGRIPLYSAVVHSVDEIREAVRFAKQKNIRLVIKNTGHDSTGRSGAPYSLQILTNRLKDLTFHDDFLPSQGGVRLDNPDATGVPAVTISAGVMVGELYAAAAAQGLVVVAGECSTVGVAGGYLQGGGVSTVLSPKYGLAADHVLELEVVTAQGEIVTVNGYQHKDLFWALRGGGGGTFGVVTKATIRTFRDIPSVIPIIHFTYPQTDNIFWETVMQVVRLTQSMSVNGNAGQYIIGRLPNYHWYVNWTMFVWEDTESAWVEEQVSPFLRCLDWFEIEYQYELAEY…
g262.t1	OJJ77043.1	OJJ77043.1 hypothetical protein ASPBRDRAFT_113279 [Aspergillus brasiliensis CBS 101740]	Aspergillus brasiliensis CBS 101740	98.8	328	4	0	1	328	1	328	2.03e-216	603	MWDSLSNPPEGLVGGYQGGSMTIKILMAVFCAIALYNAVELVILIFLTFTRYSGLYFWAMLLSAVFGVIPQAIGFLLEFFAIGPLWFAVTFSTIGFYFMVPGQSIVLYSRLHLVVQSQTLLRRVLYLIIFDAIVLLIPTTVLTYSTIYLGTPAVIRGFNVMERMQLAWFCAQEILISIIYIFETLKLLRLRPEKDVERHKTMYELIAINLVIILLDVALLVLEYVGLYTLQTTLKAAVYSVKLKLEFGVLRKLVSLVNTRPAESSSSDPESYPTFVDPNQIQGDVTRAAPAYSRRQSRYPWATISTDSLALTERRSQHVTSSELERPP
g263.t1	OJJ77044.1	OJJ77044.1 hypothetical protein ASPBRDRAFT_24753 [Aspergillus brasiliensis CBS 101740]	Aspergillus brasiliensis CBS 101740	99.3	1317	9	0	1	1317	1	1317	0	2560	MDSHNPPTSTGQGTDPGPHPPEAPVTANEESTVSDQGYNPSMDGATVGGTDRVYPIRSIISFNPAATDTTQQDLTSEIRSPRSGARSYSIIDADTWDQLSSQSNSSPHTNPSPKPPVHSPESTDRPSQQSPDVLSPASSAAGRDAPPDESTRYRKVAPEEGHASLVTSRFQHVITAGGHAVITGNTPDSFRACEDEPIHIPGAVQTFGVMLVLRETPEGSLAVHVASENSEAILGHSPSSLFALESFSDLLQDDQTDILLDHIDFIRDDAYDPASDGPEVFILAVNDRFGRPRRFWCAMHVNRAHRDVLICEFELEDDRINPLNVAGRSTPTSPTDTLGFEPTADQLAGSTVNISQPLRVLRNARRRRGEAAAMEVFSIVSQIQDQLGDAQNLDALLNI…
g264.t1	KAI2821538.1	KAI2821538.1 hypothetical protein CBS115989_2737 [Aspergillus niger]	Aspergillus niger	63.1	431	117	13	1	418	1	402	3.92e-124	375	MNNTTTTPTESYYILPQADSYTVVSFISISTFTCLLIFFIIFDLSFFKTTSTSSTSTSQKPRNLVPTYTLLTTTTTTLLASAFCILLLFNHHQTALRIASATGLVLTTTTTSITNTLLLYFALPLITIHQKPQAYFQLKTQRLLLYTIIASILLFQLPYLIVAPGAATLYKDGHWTHAVKILERISVTTYCVREILLLGVYTWSVIRYLRPVIYHHHHHHHSLYHYQLSPTHQKEGGRGTQLLYTLLMAGCISLILNIANIVTVCIVHNAAAMAFFPFVASTKVLIEILVLGKLIGFLNTHISSSSSSSSSYHQRSVYSISNESRRSSTQPLITTAGSTATMSGGLITVETKDTSSEQEHSPGCPQGQWYRSRIGSVDTIISVVDVAEPPLAHSAEHLV…
g265.t1	OJJ77046.1	OJJ77046.1 hypothetical protein ASPBRDRAFT_223966 [Aspergillus brasiliensis CBS 101740]	Aspergillus brasiliensis CBS 101740	98.4	124	2	0	1	124	1	124	5.81e-70	216	MKSISAALIALLATSVSAGPVVFTATIALANDQTGAQGSAAILADGSEQSISALYGGTGVGSGGVVKASSAQLTNFQANTNCVITNYGSVLATLNAQNTYVDLDGNPSVAQPVDLNAASVECTV
g266.t1	OJJ77047.1	OJJ77047.1 hypothetical protein ASPBRDRAFT_114493 [Aspergillus brasiliensis CBS 101740]	Aspergillus brasiliensis CBS 101740	92.4	436	32	1	1	436	1	435	3.45e-239	669	MVSLWPFRAEDTSPASFEKALAALSTKITRTTARLDLHRQHARRFKALWTLYTTFAYLLYSIIIALVLGWQNWGITEYAAIVGGPILIYLIRTISTRYYDYRITKTQAHLDDLHKQREKTIEDLKTATRWNSTQQLLEKYGGESPKPARSNSVKSGDAKRNKSEGAKRRQPSQQQQQQHVQRTGIPPPPTANIRRPAPQQFPSSPQPPATPPVGFQHPQQPSPHMFPGPQQQQQGVPNMNVGLEEPGFAPNAFSSTPPQYVEQSHWYDRLLDVLLGEDETQPKNRLALICSTCRIVNGQAPPGVKTLEELGRWRCGSCGAWNGEESEAKKVLAGIRKEQQQQSSEGGAWRHVSSSSVDGTETRSSVGDVTDDGVMVAATGSEDDQLESQSDEAETSEEQ…
g267.t1	OJJ77048.1	OJJ77048.1 hypothetical protein ASPBRDRAFT_190386 [Aspergillus brasiliensis CBS 101740]	Aspergillus brasiliensis CBS 101740	97.9	1392	29	0	1	1392	1	1392	0	2714	MTAAATLLPAGEEDAPAYRPRSYQVEMFEASLKENIIVTMGTGSGKTHIALLRIIKELESNPHKLIWFLTPTVALCLQQYKFISDNIPAVRARTLTSLDKVELWTEQPVWDAILKEMQVVVSTHAVLADAMSHGFVKITQLGLMIFDEAHHCMRRHPANKIMQDFYHPALERHGAEAVPKILGLTASPVVRSNRQELLKIESNLDAVCKTPRTHRSELMTHTHRPHLQQILFTPVLLDDPQAGSETLKALVSAWTSMRLEDDPYIKKLRKSPLDGRALQKALLSGKTYCNDQLKRFATRSLHIFEELGEWAADYFIYASVEQLKAKADNSTDTMGWTDEEKAYLLDIVSNLPTPNIDLNPSELDSIPISPKFQSLLEFLDAKGEPNFSGLIFAKQRATV…
g268.t1	OJJ77050.1	OJJ77050.1 hypothetical protein ASPBRDRAFT_190388 [Aspergillus brasiliensis CBS 101740]	Aspergillus brasiliensis CBS 101740	99.2	737	6	0	1	737	1	737	0	1442	MASTIPRDPVHSNHYVDYVIRYNFGGETDTSHATEQLDRLLRKLFEVGLQTEVRQGDESSLLIFVRASRKKSLKRALHQSRIRDWLYGVRNTEPESESSAEPQSESERLRVIYHMITVPKEAGGAGITPKHGEWKCVDAIFPLHDEAMNKQCMKDWSQKTFLSAEDLDQIRNTFGENVGFYFAFLQSYFRFLIFPAVFGFSCWLLLGSFSIIYAVVNSLWCIIFIEYWKRQEEDLSCRWQTKGVSVVRPKRREFKPEREVQDDSTGEVKGVFPATRRMYRQLLIVPFALLSAVALGVIIATCFAIEIFISEIYNGPLKTYLVFIPTILLSALIPTMSAVLVSIATKLNDYENYETQPAYDVALTQKIFIINFITSYLPIFLTAFVYVPFASRIVPYLDV…
g269.t1	XP_025456671.1	XP_025456671.1 N-acetyl transferase [Aspergillus niger CBS 101883]	Aspergillus niger;Aspergillus awamori;Aspergillus niger ATCC 1015;Aspergillus niger ATCC 13496;Aspergillus niger CBS 101883	100	176	0	0	1	176	1	176	6.50e-126	361	MSDQPTIRLATPEGKYVPIIHQFICELADYEKALHEVEATHESLLETLSFPDSPPKRGSVYTALITPPATAENPTPKPVGMALFFYNYSTWRAAPGIYLEDLYVQPSARGNGYGFKLLKYLAAKVLEIKGRRLEWSVLKWNEPSIKFYEQVGAKAMDEWTKMMMEGPALNKLAEGL
g270.t1	GAQ42858.1	GAQ42858.1 viral A-type inclusion protein repeat protein [Aspergillus niger]	Aspergillus niger	89.6	1231	126	2	1	1230	1	1230	0	1239	MLPFFPAYRLLLLVLTFCRLLFFCLSFISFAVALAHRPATVMFQRLRDAIDSRIAEEQARQRSAQTSLSRSNSARHPTGRNLSPTRRASRPRRNTGTPVRGPDPNEFEPEFAIGDDEGSSRSATPRLESAGGSEAAPEENAGEGKTSSEESATKKPEAQPVNETNQSSSELPPEIRVKLRRLGKLESRYQDLLKAYRMAHSRVLSIEPFEAALRENTPLTSISEPKALTEYLNQISLKGDLVTEELKRVTAERDDYKKKLEESQKSTKAAWDEVTKLKEDSKSQAKKDEASTAESAATNESTSDSAAKSGKASTTSSAKDTAETSQKESGTQGDSEEFFSFDSEIPRLESELKEKQEEIDTLKSQAESLKRDLSVARESTEGMVHNLESATRELVELRD…
g271.t1	OJJ77052.1	OJJ77052.1 hypothetical protein ASPBRDRAFT_60708 [Aspergillus brasiliensis CBS 101740]	Aspergillus brasiliensis CBS 101740	99.9	1530	1	0	1	1530	7	1536	0	2940	MATGDGIIAAPPSLESSSLDPLHVPASSSIAAGSLATSIPALTASFSVVSGFSSHLPPPPITPPAPSTMVGWIGWIFSFIFQVIPSVLYWIVTFTTITLPTWLFTLFSMSLTFTMNFTTLLLIALAVVSTISWFIRYRFLNMYSRLPPEPQRKEPQLDLFPDVPDSDTKPGLANYLDEFLSAIKVFGYLERPVFHELTRTMQTRKLIAGETLLLEEEKGFCLVVDGLVQIFVKSMRDRKSGTDEDLNRMAGESSDEDDHRMDGRQGYQLLTEVKNGASMSSLFSILSLFTEDVQLRYADSSASSASSTGPGPAIGPDSFPTSPRGMVDSPLEYQGDRLDPASHRNSTAEDLPAVPPLNLGESQVPPAHSAGSDSRKYPGKTRRKSVHPDIVARAMVDTT…
g272.t1	OJJ77053.1	OJJ77053.1 hypothetical protein ASPBRDRAFT_50031 [Aspergillus brasiliensis CBS 101740]	Aspergillus brasiliensis CBS 101740	99.3	288	2	0	1	288	1	288	1.02e-214	595	MVQSLGLPMCSRRLCTWWSAMFCFGLLALLYIRLLRDDLILVLSRVEKHPARRKPNALVLAKTRAEDVSWAYALKPQWKPYIYTSDKEPGYRSIPANKAREGMAYLTHIIEHYDYLADVTAFMHASATQWHNDVGDMASSSLLQKLSLDAVEKAGYANLRCEHRPGCPVAVRPFDPAMESNHNVVYRNFTSIYMDMFSVQREQVPTEIGGVCCGQFVLTRDRIRKRPRDDYVRMRDWALATDMDTFAAGSVFEMLWHIIFLEQPVSCPDVQQCYCELYNLCPEIDSGS
g273.t1	OJJ77054.1	OJJ77054.1 hypothetical protein ASPBRDRAFT_224226 [Aspergillus brasiliensis CBS 101740]	Aspergillus brasiliensis CBS 101740	98.7	533	7	0	1	533	1	533	0	1057	MAPPVILTAAVLLSLPYQLAALQPNPGNISTPATANDGTLPRSLESCLGATGASVVYTTDAGYSNLTVADNSNYHPHPQAVVIPNSTEQVAATVRCVSAEQGRVTLTTRGGGHSYAAYGLSGQVVIDSSQMTEIALNESTQEVNVQMGQKLGPLALAMGRAGFALPHGTCPGVGVAGHSLGGGWGFTSREWGWLVDRIVSLELVDVTGRIRTISPKATSLNSTSTDDKNDGDLWWALRGAGSNNFGIVTSFTYRMEPAPTAIVNYNIGFATQSDCVQVLLTLQEIGSLPPTSSAGFPTSLGGELIIDGGYEPPKAYCSFTGQYLGDMAAYNETIQRLLSPLARQSIQPLTTTSSFFNNWVSALTNLMGDLDAPSVPQPYYAKSLVDDGHPNYTSTSIST…
g274.t1	OJJ77055.1	OJJ77055.1 hypothetical protein ASPBRDRAFT_24765 [Aspergillus brasiliensis CBS 101740]	Aspergillus brasiliensis CBS 101740	100	168	0	0	1	168	1	168	5.84e-116	335	MFSSTVARPLQLVTRFMQWASAVIVMGITSYFIHKGPRGQHIIYWEVISTMSVVFFLPAFVSPFMPNALSKFVLLIDVVFSYLWLTAFIFAAQDYNWHNCGANSPPGLSCSKKKANEAFIFLTFIFTFFAMFLEVGALWAYRRESTPVREKNTGGAHGGPADAPVATV
g275.t1	OJJ77056.1	OJJ77056.1 hypothetical protein ASPBRDRAFT_24766 [Aspergillus brasiliensis CBS 101740]	Aspergillus brasiliensis CBS 101740	91	267	24	0	1	267	1	267	4.30e-176	496	MSAPLEDPERKAMRKSLRRLERHITELKPDHQIAPSEIDQLRFTSMVLDEDSDDRPVFFTSLEGSFLQTPDNKYDKKYGAEYDTYESISDDWRTPKICAQAINIYWSNCISKYFLGKQPPGGEIVWSLVKVRDSVYKDLYRYDFPEFGFTDVEQVRHGPYAHMKGTIYNNLNADDDHVLRGELLPILRLMIGHLRRARFIDHMVAPIMVFSFMGPQQARVFEVYMEGHTVVVRRTKLYDLRTKDAAAFKTFAQWYFGRPRAPTGTSQ
g276.t1	OJJ77057.1	OJJ77057.1 hypothetical protein ASPBRDRAFT_70575 [Aspergillus brasiliensis CBS 101740]	Aspergillus brasiliensis CBS 101740	93.8	435	7	1	1	415	1	435	3.73e-286	787	MSTTTIELALQGQEESQGPVQPFGPSTADAIVQQKQKWNDPPINRWRLLATFISFAVVGANDGVYGALVPYLREDYNLSTTVVSLIFVTPFAGYTIATLIVNKIHMTLGQRGIAIIGPLCHIIPYVIMATHPPWPAMLAVYVIVGLGNGLIDAAWNSWIADMANANAMMGVLQAFYGLGATLSPLIGTQMIKSGLRWNYFYYTLLGVSVLELMVNSTLFWKEDAVSYRAKNHRSSGSGGGSRTTEVMKSPITWLIAVWLFVYMGVEVSVGGWVVDFMVQVRHGEPYESGLIPTGERIAISMYLAISIVLELIFWLVPQFVVSAVAILLLGFFTGPLFPAAIVVAAKLLPKHLHTPGIGLASALAGGGGAILPFVAGAISGARGVQSLQPFVLALLVALI…
g277.t1	GAQ42850.1	GAQ42850.1 cytochrome P450 [Aspergillus niger]	Aspergillus niger	85.8	939	128	3	1	934	39	977	0	1596	MDTLTWWYEFYFDVVQPGQYVFKIQELHTRYGPIIRITPDEIHINDVGFLDTIYAPSMTRRDKYGYQLRSLRVPGGVGTTTDHDLHKLRRESLTAFFSKKNILYMEGLITNKVDQLKQSISTHVATGTPVNLSDAFFAFSNDVVTNFLFAHQTDVLASESKAAILRQNSKELLMGINLNKHFPQIPDFLESLPMFISRPMMPPGLIDMLALFDRVREEIVMIMQRKESAVTVNKHPGPTGKESVFDSVLDNPNLPASEKTLLRLQQEGALLVLAGTESPAQTLNIIFYHLLANRTLLEKLRQELRAVPVPSSWTQLEQLPYLSAVIEEGNRLSFGVTARSARIAHEPLTYTPSAYVSSTCPPSTKDKSYTIPPGTPVCTTTLSAHTADTVFPDPFVFDP…
g278.t1	OJJ77062.1	OJJ77062.1 hypothetical protein ASPBRDRAFT_165645 [Aspergillus brasiliensis CBS 101740]	Aspergillus brasiliensis CBS 101740	100	752	0	0	133	884	1	752	0	1444	MESPHEHQQALLLSRIIGNIEKLNESIMVMNRSLQEVNIQNMNVELVAQMFKNYQSNVLFHLEAPLAVAGEASTTPTKAGELSSSSFLSFLITNTTANCVLLSLTALSARIYLLLVGIWCTSPYDTHCNATTMAITSIQSVLPTRFTINSTEKGATKPPPEPYNVQDHPFKGYHPPQPEGYEKSKSTSAIVIDNGSNLVKAGWSFDKTPRFVLPPVMSRYRDRKLNKACQFIGYDSYVDATTRGQLRYAFDPGTSVVGNWDVMEGVLDYLFIKLGVDGANGGVDRPIVMTEPIANLAYPRRMMNEILFECYSAPSVAYGIDSLFSYRYNRGKDGLIISSSHTSTHVIPVLNNKALLSNCSRLNWGGLHASEYLLKLMRLKYPTFPARMTESQMEDIVHK…
g279.t1	OJJ77064.1	OJJ77064.1 hypothetical protein ASPBRDRAFT_36255 [Aspergillus brasiliensis CBS 101740]	Aspergillus brasiliensis CBS 101740	100	187	0	0	1	187	1	187	5.88e-123	355	MAPLTPAEQEQHQALLDRLDIAQVPRPFRNPNWKPSQRRNKNVKQLISESTRKEASVMATQSNSGATTPLPATSASTDGSQTPADGTPRTNIAQAAQNLSTLVLEKNARAAFTSGPAVTYTNIESAPSLHPSQQTRYCDITGLPAPYTDPKTRLRYHDKEVFSVIRTLGQGVPESYLELRAAHVVLK
g280.t1	OJJ77065.1	OJJ77065.1 hypothetical protein ASPBRDRAFT_36258 [Aspergillus brasiliensis CBS 101740]	Aspergillus brasiliensis CBS 101740	99.2	120	1	0	25	144	20	139	4.69e-73	225	MRAPTAQFPHHLPIDTPTNNVPPIGGLFLFGGVLMFFDRSLLAMGNILFLIGLTLIIGLEKTFAFFSRRQKLKGTAAFTAGILLILLRWPLTGFIIELYGLFILFGDFLITIGQFAGNIPVVGPFIKQVLETLAGGRRNAELPV
g281.t1	GCB19295.1	GCB19295.1 profilin [Aspergillus awamori]	Aspergillus awamori	85.8	155	10	1	1	155	1	143	1.60e-86	259	MGQHSAIWQGTVYPNHVYPASATAAPPSWHRNSDASPFSLMGSGQFDKAGILSHDISGVEASSPGFSVSPTELQGLVAAFKDPNTAWANGITVGGEKFVTIKADERSLYGKKGKEGIVVVKAVSCVMVAHHAENVQTTNAATVVENLVDYINNPR
g282.t1	OJJ77068.1	OJJ77068.1 hypothetical protein ASPBRDRAFT_24777 [Aspergillus brasiliensis CBS 101740]	Aspergillus brasiliensis CBS 101740	96.3	571	21	0	1	571	1	571	0	1036	MARGTFLGRSRTIRQAEAGSSATSKRSDMLPRKDQKCIESGANNGRPAPHANRDFHRPGASEGRQQKKLQAMSPINTEAPPLPCSPISSPVSINNDMNGSLIGVALGSPRMIDPQAPMAQMQEAVPAKPAEPQTRPSLQRKPSKWKKIGGLFKAKAAMTAPPNQPFYQVRLENEWPMQDSTYSFDQQPKVQSPEHENPASPTSGAEAWPSITPEIHTSTQEPKQPHPDATSGSPQAKEQSLGSGPLLQVDIPDIQLERYSVMFGGVLKKNRPSSMNRRSKTLEDTIPPAEEDVPHSPDMEPRRTSPTRSKSPSPSFSLFPSTKTTKASKVLGSQNIPRGPSPLHRSQTSLGDQENMSEKNSVVLMIHSSQPSHKQQNSVSSFLSSTTIGSEDERLLLQK…
g283.t1	OJJ77069.1	OJJ77069.1 hypothetical protein ASPBRDRAFT_36265 [Aspergillus brasiliensis CBS 101740]	Aspergillus brasiliensis CBS 101740	99.5	1996	10	0	1	1996	1	1996	0	3922	MAVNGSVESQWLAQLAAMRQAIADLKLPQDPAKDTSYGSDLDLDFDDDYSSPGTADDHIWDIISSDEEAGEDFDDYDDLPSPPASSAYDQVWLEQKCMGLAANKSGMDAGELAQQITAALATDSGDDELQMSLAEIVGFNDLDFVIDLISHRADIVASSHTGPEAQTDGLMAGKLQTRAEREQALRQADYEHKHASLMPAQTRSEPHYPHVFKSYESRNVLAFGGKRYGLPMGSKQIDEKNYTEVEVPASKVGTLRPGHKLVEIASLDGLCQGTFKGYKTLNRMQSLLYEVAYKTNENMLICAPTGAGKTDAAMLTILNAIGKNTIPNPIEEPHATEFAVQVEDFKIIYVAPMKALAAEVTEKLGKRLAWLGIKVRELTGDMQLTKREIVETQIIVTTP…
g284.t1	OJJ77070.1	OJJ77070.1 hypothetical protein ASPBRDRAFT_225127 [Aspergillus brasiliensis CBS 101740]	Aspergillus brasiliensis CBS 101740	94.4	337	19	0	1	337	1	337	9.72e-171	488	MPDPRDDYGRRRQRSPSGSPSPDRDRRQRRRDDDRGSDSGHRETHRSSRRDNSRRRSSRSPADRRSHRRDYDRRRSERSERRDKEDVSEDDRRRRRHTSDRESSYRRHRDQDSHDRKERSSRRRRDYSRSRSPTRRSPSPDSRAPVRSKAPLPPQNDAYTSSEVARTGESGAPPPEKEKPNFGQTGRLAAESKTVNVNGSSVVLKYHEPPEARKPPAKEPWRFYVFKGQDLLEMVELGIRSCWLIGKEQLVVDFPLEHPSCSKQHAALQFRFVEKRNEFGDRIGRVKPYLIDLESANGTTVNGDAIPAGRYVELRDKDVVQFGLSSREYVLMLPPPE
g285.t1	OJJ77071.1	OJJ77071.1 hypothetical protein ASPBRDRAFT_24780 [Aspergillus brasiliensis CBS 101740]	Aspergillus brasiliensis CBS 101740	100	308	0	0	1	308	1	308	2.25e-228	631	MLKKPNFLCCGGGLQLLNSSCLSSPPRACAFPSPSRYSARRYATASHNPEADLSWPSSPTFTPYELFKQDRTAPYSKARYYEMVKIYHPDRPCNGHPLCRNLSPEVRLQRYHILVAAHEILSDPSRRAAYDFSGAGWNLHAHETPIPSWARTGSSNYGPIYANATWEDWERWNNRHQGKQQTLVDHRTFATFVILLTLMGGALQASWISKLSSGYEDRLWELNEESSRLLKGRRENTQNQMQSIDARVQHFLIRRDPSGHGLKEEEQPVYRQVLHSQETSDDSPAEVVELGRQGDRVSGGLVQAETRS
g286.t1	OJJ77072.1	OJJ77072.1 hypothetical protein ASPBRDRAFT_50044 [Aspergillus brasiliensis CBS 101740]	Aspergillus brasiliensis CBS 101740	81.7	672	62	4	1	611	22	693	0	1084	MKPPVPERLQQIHTSPSGGQYEPIVSLDSRKAGYVQDQEAAQEKLFQFCSERSWHESAKTAFVPRPILVSPEHQRQWKELNDALVSAITDIVERWWTDSASRFPEPFLRTESRGSWRPDFLVEIDNSEGAPDFKENFRISEINARFSFNGYMYADCGQQALKEQGVCDGDNGLVGATEPAKLLEGLLNLFSHDLPLHVLKGDEHGHDIHMFVDFLRTRCGINPRFVLPADLRLVPYPEDKDGYRLCCVIRESEHQATESLLPSIYHDGEAMEDIHQVGLELHQRELSALSPEMLRQISLRCFNDMRTVLLVHDKRIQGLVRQELGSLVERNVITPVQAETLDKGIADTLLPGSSELVQFIGDCKKDSKLKNEYILKPARSGKGDGILFGEDLDAAEWVS…
g287.t1	OJJ77073.1	OJJ77073.1 hypothetical protein ASPBRDRAFT_190411 [Aspergillus brasiliensis CBS 101740]	Aspergillus brasiliensis CBS 101740	89.4	464	49	0	1	464	1	464	8.02e-304	835	MTIKPFSLGEVLAVAEIHPLYNPNIRYPPGPEEIQAAVQLAGAQSADSNSGIESWPLTTKKSLYKVIERLTKDTSPQNEYRRSSYVSVTGGGSGGLPLMFITDAQKNRQHRAAFGEFLRTCGVVEPHDWILTTHASGYLYRSLDLLSEILENAGGTILSAGNFMTPGEVVRALAHYNVNVLTGDGSQIIQVIHHISTLSAEEREGINLTKVIYTSEPLTEGQKRHIYATLGAIKICSILGSAEAGPYASHNPDITGEACQIGSMDFVFDTRSILIEILPSSVMEDDSPSLGIQPLPEGEEGVIVQTSLHRRRNPLVGYITGDLASIHPLPDIARSTVPESELKYLRVLRLRGRDRRFSFDWYGVYFEFTNVEQLMQKEDLGILQWQIIEGTHDSSPQTT…
g288.t1	OJJ77074.1	OJJ77074.1 hypothetical protein ASPBRDRAFT_190412 [Aspergillus brasiliensis CBS 101740]	Aspergillus brasiliensis CBS 101740	98.9	447	5	0	1	447	1	447	2.14e-315	863	MSRIYQLSRALQRSRIGHLRPPCSLLPARPSRRGFSTSAARPLMELTGFSEEQLTVRDAVSAICAKFPNTYWQECDQNERDPKEFHAALARDGWLGIALPEELGGAGLGISEATMMMQTITQSGAGMAGAQAIHANVYATQPLARFGTREQLEETIPKIIDGTWRTCFGVTEPNTGLETLKLKTLATKKASEDGSSIYSISGQKIWITCAQVASKMILLARTTPLEEVTKSTQGLSMFCIDLDRTQPGLDMRKIKKMGGRAVDANEVFFDGYEVPANTLVGQENDGFRIILHGMNAERCLLAGEALGLGYAALERAADYAKERVVFGRPIGQNQGIAHPLADAYMRLEAAKLATYHAARLYDASKKDEGIPLHSVGVACNSAKYLAAEAAFTACERAVL…
g289.t1	OJJ77075.1	OJJ77075.1 hypothetical protein ASPBRDRAFT_114323 [Aspergillus brasiliensis CBS 101740]	Aspergillus brasiliensis CBS 101740	98.9	279	3	0	1	279	1	279	6.46e-193	539	MKFTNYLLTTASLASSVLAAPAPRTDLENRLRTRSLLRQSHPLAPIPLDTSTKEESRLLEASENTTHVTYSSNWAGAVREQPPPQGTYSAVSATFRVPEPTAQGGSGTQAGSAWVGIDGDTYSNAILQTGVDFYVENGQTYNDAWYEWYPDYAYDFDLDVSTGDTIVAKVEVISPSQGVATIENISTGKKATQTLKAPAATATLAGQNADWIVEDFQSGDSMVDLAGFGEISFWGVQAQGGGSTWGVEDATIVELKQGNQVLTDVDVQSDSAFTVKYMD
g290.t1	OJJ77076.1	OJJ77076.1 hypothetical protein ASPBRDRAFT_112551 [Aspergillus brasiliensis CBS 101740]	Aspergillus brasiliensis CBS 101740	99.2	377	3	0	1	377	1	377	2.26e-281	771	MAPEPLASSSDDIATVLQLVTPPQIAPHRSHDPSNNQKRSDPFQFGSRYLEEGDDVFEFNAWDHVEPDDEFKAFAEVQYSKQRETPVSEFDRNRFNADPAKWWNLFYKNNTANFFKNRKWLRQEFPVLADVTQPTAGKKVVLEVGAGAGNTAFPLLENNENEELMVHACDFSKTAVKVMRESPHYNPKHITADVWDVTAEPDENSNGLPPGLTEESVDVVVLIFIFSALAPEQWNQALRNVYRVLKPGGHVLFRDYGRGDLAQVRFKKNRYMGENFYVRGDGTRVYFFDRDELEQMWSQWTPEKGLPTAPAAGQETEVKGEQNTADTKGVFDVKKLGVDYRLIVNRQRKLKMYRCWIQGHFLKRDPTAAIDASKNES
g291.t1	OJJ77077.1	OJJ77077.1 hypothetical protein ASPBRDRAFT_140576 [Aspergillus brasiliensis CBS 101740]	Aspergillus brasiliensis CBS 101740	100	615	0	0	1	615	1	615	0	1201	MLLSQTRGRMPSALRSIAKRSLLNSRPLSTTLPKQQNGNDDEYTGLNKVSRHITQPISQGASQAMLYAAGLTEADMNKAQVGISSVWYNGNPCNMHLLDLNNRVREGVQKAGLVGFQFNTVGVSDAISMGTKGMRYSLQSRDLIADSIETVMGGQWYDANISIPGCDKNMPGVLMAMGRVNRPSLMVYGGTIKPGCASMQNNADIDIVSAFQAYGQFLSKEITEPQRFDIIRNACPGGGACGGMYTANTMATAIEVMGMTLPGSSSNPAESDAKYLECLAAGEAIKTLLKEDIRPSDILTRQAFENAMVLVNITGGSTNAVLHLIAIADSVGIKLDIEDFQSVSDRIPFLADLKPSGKYVMADLHKIGGTPSLLKFLLKEGLIDGSGMTVTGQTLAKNL…
g292.t1	OJJ77078.1	OJJ77078.1 hypothetical protein ASPBRDRAFT_112415 [Aspergillus brasiliensis CBS 101740]	Aspergillus brasiliensis CBS 101740	98.6	1402	19	0	1	1402	157	1558	0	2645	MEIGLVWSAGHRLDAVSVGLTTSLLGISCSRAVLCLLLPRRPDVYHDGQVVDQERTVSAMERFTFSWVNNLLKHAIANGGLELDDLPKMPFDTRSQTLHSRLDRMRGSRALWKSLVVAHQSSLILQSSLSMIICVLSFGPQAAMYGILKALENRSFNPNINSKDVNEAWAWVFGLGTVLILSSSIESWLWWIIYAKLWIPIYEGLSALVFAKSMRCKDIKQVVWSEKMEGEGHGEEELQKDVGSQSPINLASVDSKRIADFVMFNYLIPSCVIRLLIGGAFLVHLIGWPSLLAGVATALLVAPMNAYLTKNYATAQEEYMKASDKRMGAVAEVLHGIRQIKFSALEQQWQDRIREKRRVELNLLWQTSLYTIGMVSVWIMGPLMLSAVSLTVYTLTRGD…
g293.t1	OJJ77079.1	OJJ77079.1 hypothetical protein ASPBRDRAFT_190417 [Aspergillus brasiliensis CBS 101740]	Aspergillus brasiliensis CBS 101740	89	335	24	2	1	330	1	327	4.22e-163	468	MGSDLLQSPTSQDIKTEIATQSSSPPPLPVVTPAAAAATAAAQVDPEDDWAGLCDRKERRRRQNRLNQRAYRKRKQAERSSNNNALVIRSSSSQPPLGINNKNEQGNSSSSPSSSSFSSPDSNSSQVLTRQTLSREASKPENIRRIFEHFARVAYESYFRGSPSADHLLTLSKLNVFRAFMTNMSVLGFGNQTTWCDDDDALSVFNTLPPEAIQEKRLPVSLRPTKIQMQVPHHPWLDFFPLPRLRDNLCLMIDRFDDDELCHDVMGFWDNASDTCSLLVWGEPSDPANWEVTEQFIRKWPWVLRGCPELLKSTNRWRQKRGEKMIIRYL
g294.t1	OJJ77080.1	OJJ77080.1 hypothetical protein ASPBRDRAFT_24790 [Aspergillus brasiliensis CBS 101740]	Aspergillus brasiliensis CBS 101740	99.7	354	1	0	1	354	1	354	1.54e-265	729	MGELQHYPADTPNVPFAQRPIIILGAGIIGCAAARQLLQNGFPVILVAEYLPGDQDFRYASAWAGAAWHPAGGISSDWRYLQAISHRQLLKMAQEEPESGVSIVDALEYVERPPAENSSAWGRTLAAKWRDLQPGEYPSEFSCGWSYETLVTDPTIHMPYLGKKITALGGQFIRKRIESLGDLYHMFPESSIFINASGIGSQTLKDVQDDQCFPERGQNVFYKTENCRTMYFRNGQEYTYVIPRPMSHGVILGGVKQADNLSSEPDMEIARDEIARAHRLAPEIVPEHPPEDTLSYIVGIRPSRKGGFRLDSEQHGDRYILSAYGFGGGGYAFSYGVADALCKMVEEAERENVI
g295.t1	OJJ77081.1	OJJ77081.1 hypothetical protein ASPBRDRAFT_114136 [Aspergillus brasiliensis CBS 101740]	Aspergillus brasiliensis CBS 101740	99.1	435	4	0	1	435	1	435	0	908	MAHSAAELQNPTGEYRQYLPDLSLKRFQVMRTQDAHEYAHDFKTLKNPPWLHALYMHWLDLLQEPFKGVTTDGNVRPGLFTLQDEGVPVGDIVESVQNVLSLADDKQRQALSYHIDSPEWRTWSNPEFLLAHKGLRLDEIDNKLRDAIMNVLKTTLSPEGYDKAVKAMRINHFLGELVESPKVMNEFSYNFVLFGRPSTTRPWGWSFYGHHLCLNIFLYKNQIVASPWFTGAEPNEIDDGPYSGTRIMQIEEELGLRLMQSLTPDLQQKARVFAEMHDPAMPPGRWNRDDQRHLCGAYRDNRVVPNEGITVDGFTEEQKKFMYGIFEQYLLYLPARARQMKLDQIRQYESETYFCWIGGYGDSDPFYYRLQSPVILVEFDHHSGVFLNNEEPKKFHIHT…
g296.t1	OJJ77082.1	OJJ77082.1 hypothetical protein ASPBRDRAFT_50052 [Aspergillus brasiliensis CBS 101740]	Aspergillus brasiliensis CBS 101740	95.1	596	25	1	1	592	1	596	0	1164	MSPTKEDIHFDDDVPILIVGGGPCGLLLAYLLTQLGGTGPSSKLLQAPKAHALSPRTLELCRQYGLDVTEIRNIGTKRGEAFWVNFITSLSSRQVGRLPYERMDPEVLESTPTMIHNIPQPEFEELVAKRLSKNNLVEIRKNHSFVGLIDRGDYVLATIENRATQKEYTVKCRHLVACDGAKSAVRRCLGIESEGEDSYETMMTIHINANLHPVVKERVGMLHWVMDPEVSGFIIGYDLGGNQVLICNFDAEKHPVNSWDEALCRKVVDAAIGTKIPYDVLSYRPWILSRKVALSYRANRVLLAGDAAHSFPPTGGLGLNSGLGDVHNLAYKLAAVHHGWGGDKLLDSYEADRRPVACDNAEQSVKNGKQIFGLLKALGTTDPDVHVARQNLYRNIEDP…
g297.t1	OJJ77083.1	OJJ77083.1 hypothetical protein ASPBRDRAFT_36278 [Aspergillus brasiliensis CBS 101740]	Aspergillus brasiliensis CBS 101740	98.5	206	3	0	1	206	1	206	1.15e-127	368	MSGLEVIGSISAIIGIIDASIKIYKGMRQDKKLSDNFKVVGARLPILLDSLQTCRSHLEPAKDRLPADVCKSLEQVLDDCDEKASKLRQIFEKVIPGEDDAAEKRYLKLIRRFGKGNKVEELMASITKDVQLIVNNHAIKSASPNQNNQLARVIQEMESLKSDSPDESSGFQFNSGGGAQTNNVNSGSGQQINNNAAVGTQNFGKY
g298.t1	XP_025539812.1	XP_025539812.1 glycerol-3-phosphate O-acyltransferase [Aspergillus costaricaensis CBS 115574]	Aspergillus niger;Aspergillus tubingensis;Aspergillus luchuensis IFO 4308;Aspergillus luchuensis;Aspergillus luchuensis CBS 106.47;Aspergillus vadensis CBS 113365;Aspergillus costaricaensis CBS 115574	98	711	13	1	1	711	1	710	0	1358	MARRFMIPWLYDLGVWIFTLCLDIFFREVYSRGAWRIPKRGPVIIVAAPHANQFVDSILLMRILKHYAGRRTSFLIAEKSMREPYIGTMAGCMGALPVVRSMDHVKPAKGEIYLPDPDNDPTLVRGRGTDFTSDQFMVGGAIILPRVGKTSPEQQAIEEILGPEEIRLRKPFKKFDKDHPLYEQVRKGTPFKVAPHIDQSKMFASVYSELVAGGCIGIFPEGGSHDRPSLLPLKAGVAIIALGTLAQDPNCGLSIIPCGMNYFHPNKFRSRAVVEFGNPVQVHPDQIEAFKAGGNSKRNAVGSLLETITEALTAVTQQAPDHETLMVIQATRRLYKPLRMKLPLPVVIELNRRLLKGYTQFKDEPKVLQLKKAISDYNRRLRALGIRDHQVEWGDVTHR…
g299.t1	XP_001400962.2	XP_001400962.2 allantoinase [Aspergillus niger CBS 513.88]	Aspergillus niger;Aspergillus niger CBS 513.88;Aspergillus welwitschiae;Aspergillus phoenicis ATCC 13157;Aspergillus niger ATCC 13496	98.6	503	7	0	1	503	1	503	0	995	MEASQIPSIAVIASSRAVISGRLTSATIVISRTTGKITAVFDSVIPASDFPAGTPYTDYSPHVLLPGLVDAHVHLNEPGRTEWEGFYTGTQAAAFGGVTTVIDMPLNAIPPTTTVANFKEKLRAAQGKCWVDVGFYGGIIPGNAGDLKALVQEGVRGFKGFLIDSGVDEFPAVSSEDIRKAMAELADEPTTLMFHAEMLPPSTASEEKDQALDGPAEAYSTFLASRPSTFETCAVEEIITLSQVAPKLPLHIVHLSAMEAIPLLRKARADGVPITAETCFHYLSLAAEEIRDGDTRHKCCPPIRSQSNQDALWDELERHAEDGVIQTVVSDHSPCTPDLKLLPSHVPGCCTSDGDTTPVDNEGSFLSAWGGISSVGLGLPILWTELSRRKALKAADETT…
g300.t1	XP_025480158.1	XP_025480158.1 extracellular developmental signal biosynthesis protein FluG [Aspergillus neoniger CBS 115656]	Aspergillus neoniger CBS 115656	93.7	931	55	1	3	933	9	935	0	1738	MSSSISLPSFSLLSTASVALVLPLLPLLLPFSSSPGSKAHGQSWPTNRDPQTIDRSNRPTNQRTMDPLASLRRLVQTHPLIDNHAHNLLAQAAASNYAKYPFEQITSEAQGPALHNSPSTLPLQRAAAQLATLYDCPTSEWDRVKAARDQYVERDYDGLIRRCLEGTHSLLLDDLLTDQDIEPFTWHDRFTTAPTKRIVRIEVVAAQVLSSILPNGYDQSSSDVTVLRQYMDQFSQGFNQKISEAIADPVVVGFKSVICYRTGLNVQVTDDKDDGSLLESFSRTLSQGSGSTYRVEDKPLNDWLVRQALNQLQSAKENDASGPNKPLQLHTGLGDNDINLILSNPAHLQDLVARYPKVDFVLLHSSYPYTREAGYLACVYPNVYLDLGEVFPMVSRDAQ…
g301.t1	OJJ77088.1	OJJ77088.1 hypothetical protein ASPBRDRAFT_36284 [Aspergillus brasiliensis CBS 101740]	Aspergillus brasiliensis CBS 101740	99.2	377	2	1	1	377	1	376	2.36e-260	718	MPSPLRTAAAAARYGPTTTRHALRRLYSSASHHSAATPATSPFAPRHLLSIADLTPTEFATLVRNASSHKRAIKSGAIPQSLHGALSGKTVAMMFSKRSTRTRISTEGAVVQMGGHPMFLGKDDIQLGVNESLYDTAVVVSSMVECIVARVGKHADVADLAKHSSKPVINALCDSYHPLQAIADFQTISEHFAGSAGAASGKGKLEGLGLDGLKIAWVGDANNVLFDMAISARKMGVDIAVATPKGYEIPKEMLEIIEQAGEGVKSPGKLVQTNVPEEAVKGADVLVTDTWVSMGQEEEAVKRLRDFEGFQITNELAKRGGAKEGWRFMHCLPRHPEEVSDEVFYGNRSLVFPEAENRLWAAISALEGFVVNKGKIE
g302.t1	GJP93699.1	GJP93699.1 sucrase/ferredoxin-like family protein Fmi1 [Aspergillus niger]	Aspergillus niger	91.2	363	29	1	1	360	1	363	1.09e-230	642	MAGRQRIMRAASLQCLPSISRPNRSAATSVRLFSSTSLRSNPSRIPLDIPPPFPVTKTCPEPSCSCPPTPSMPAPIDYDQPLNGTMAAYAQQLLICTGQRDWTSRIEEDGQGQNWGELVRGLKRLLGRGGKYADPFNNILVTTSSFHSSSSSSTSAAPSQTAPAFLFPSFKYFPSVPVNFPESAPAKADLSTFVRAFLLPIESRHGGQIRDQTLASKFPDAVDLQHSPVVLICGHGGRDMRCGVMAPALETEFQRVLQSKGYTSADSETSVVDSPEHAHIGLISHVGGHKYAGNVIIYIPPGMKEAGSSSPHPLAGKGIWYGRIEPKHVQGVVEETILGGKVITDHFRGAVDRESGVLRL
g303.t1	OJJ77090.1	OJJ77090.1 hypothetical protein ASPBRDRAFT_165694 [Aspergillus brasiliensis CBS 101740]	Aspergillus brasiliensis CBS 101740	99.4	332	2	0	1	332	1	332	1.75e-244	674	MAPVGLLARFRTLITKDYDEPAISTQTAAFLSVCLTLVYVVPFYVNPTTRPSPTLSRDAPSVIRARIRAVTFSCTISSLIVLWLVAAKENASFSRALHFLGWWPVGLVDIFRSLLLTAILFAGPLFERGVAEGEWREWIRGGRVTASLRSWIGWRNYVAGPITEEAMFRSAIVPLHLLAKVDPGRIVFVAPLYFGIAHVHHFYEFRLTHPDTSIIAALLRSVFQFGYTTIFGWYATFVYLRTGSLLAVILAHTFCNWCGLPRLWGRVEAGVPMGPPMVKGKGNSDVAYGQLGLGWTVAYYVILVAGAIGFFQALWPLTDSLNALASFSGAGK
g304.t1	OJJ77091.1	OJJ77091.1 hypothetical protein ASPBRDRAFT_70599 [Aspergillus brasiliensis CBS 101740]	Aspergillus brasiliensis CBS 101740	99.7	620	2	0	1	620	1	620	0	1302	MAAVEGPEIIHREPVPGTDLKHLPTVSLEPLINELSVSEKANGQARPAFEIEEHPIDEVRPIKVGVIGAGLAGITAGVLFPAKLPGLDLRIYEKNSGVGGTWFENNYPGVRCDIPAHVYQSGFAPNTQWSEEFAQGAEIREYWQSIARKYDVHKYLRLQQQVQQAVWLPELGKWRVTLQDLGDNNRLYEEDLDVLINAIGHFNAWKLPEYPGIDEYSGVLFHSSHWNHDVDLKGKRIALIGNGASGLQVLPSIQPIAQHVDHYARNRTWIADSFGTSGVRRLEPNSFSPEQLESFRDPDAYLAYRKSVEAGYFSRFGAIFKNSPENRSLREKWTELMKARVADQPELIDKLIPDFPPNCRRPTPGPGYLEALTKDNVSYIQTPIQRFTSTGIVTTDGVE…
g305.t1	GAQ42822.1	GAQ42822.1 C6 transcription factor [Aspergillus niger]	Aspergillus niger	76.4	1021	189	8	1	1016	533	1506	0	1414	MASISEIRASNARITSETVPHTAVFTGATDGIGKATLTRLVLTKLPVRVYVIGRNEKKHQAFLDELRQSNRHAEITWMEGQLSLLADTKRLCDEIRRHEKSLDCLYLGAGFISSGDRIETTEGKSLSLSLTYYSRILMMTQLLPLLNASLNNPRIVSLLNAGYESSSIYLDDLDLEKPGHFSLSSLTKATSTYTTLTMSRLAQENPHVVFIHHYPGGVNTDAFKKAWGGKWYWPLFKAALATFGTSPEDAAEKVLYLITSAKFGGRGVPLEEGQRASMTMTKTVQGGELFAIDDKMKGLFQGNVMLELQAMDAGDTPNGLRPVRVRPTRTKSGSSDGQRPIPSQSLHNYTHDFQINEETTDMERRGPTPGSGSYGKACRQCSKAKCRCVARPDGVGCER…
g306.t1	OJJ77094.1	OJJ77094.1 hypothetical protein ASPBRDRAFT_114303 [Aspergillus brasiliensis CBS 101740]	Aspergillus brasiliensis CBS 101740	98.6	557	8	0	1	557	1	557	0	1086	MARVIRGEGDSLQQRGQLLFRQGNYSDALAAFTEALSCKGADVMSILDNRAATYIKLTQYDRALNDSRQMIRRDTKDGRGVLRYGQTLLLTGDRAKALKAYGYGLKTLPEDHPRRKMILQMYCKVKERASVKRLDPFATLPLELAIMVLQHFNFRELAVLLRVSKGWQRMLSQPDLWMQLDFTEARRKVHWRSFRAFVQRSRALLTHAVMTNISTPFQDKVLEVLSRCPKLEHLEIRDPITQPNGLYNVFRGSTQLKSLVITKQTPVTQEDIAKFLSSLSQLERLEIHNAQPSPESRVHWPSHMPNLRSIALLTEASIPPPGRVPALYIPPATESTSCSMPNLEELRLDSYPKVWAPYYLSFDPVQYPRLRRLDLKGVFIGPFSLPPSLEFLSIHAGAA…
g307.t1	OJJ77095.1	OJJ77095.1 hypothetical protein ASPBRDRAFT_50063 [Aspergillus brasiliensis CBS 101740]	Aspergillus brasiliensis CBS 101740	99.1	580	5	0	1	580	1	580	1.65e-315	875	MEPQNLQAASTYINNVLLARGLLKSGHPIDFANPEDEEGGCAATMGRIINLVNDLVLRRDREAEHRENLATTIRTLRAEESQKTAELEKVKTKASELTRSLALAEAQERALKTNVASADSTIRGLKEQVQRMKTTIQQVRAQCANDIRKRDLEMQKLKSHLAERQRGKREGLSMTTININPAASQSSRSRLTAGGEGINDPGYSLKQETNDFLTELCQNLSDENDTLISLARNTVETLKDLQGLSQADDEDKPATGMASVGAGRSLQGSVTALPTSCDELSAQMDHVLEHLRTLLTNPSFVPLEEVEMRDEEIKRLREGWEKMESRWSQAVTMMDGWHKRIADGGHSIQAEELRQGLDLRLDITQALSQDEGRDTTIQSPIFEDQEAEEEEEKQTAAKT…
g308.t1	OJJ77096.1	OJJ77096.1 hypothetical protein ASPBRDRAFT_225727 [Aspergillus brasiliensis CBS 101740]	Aspergillus brasiliensis CBS 101740	96.8	217	7	0	1	217	1	217	5.15e-153	441	MASYPQTIYPGPAYPGGVPFGPHWDPQSLRYLFFTGARLRMQIIEQDHDFWQYFVIPPWCHPDDSYKLPWAPRTPQLNVTTPAVSIPNPYPMDSDSVYQIPPYGFQRAQYMPVKSLRPRQHMPQGHHSSHMSYPGYQVHQGGPPQPSRQSSVQAQAGPSQYEVAKDSPKSLEVDSRDLSPVEDGSDIVPVNCTVNGKVCTDENAQDLLPLEACIFVGNLPSALHPTQIQSELKRVFSKHGRCFVKVKTNPKTGLKTAFAQFETSDAANIVIQKSNDQPSAFELHQRPLRFEMARGKKGPANGTSSLRVPQPVPSSTRGESSEGSVEPAHEMNGESSIEPAHEQNDKGNVEPAHKVTGESSVKPTQDDTEVNPESSKSAKEIYKSIYKAQASGTRSDPCL…
g309.t1	OJJ77098.1	OJJ77098.1 hypothetical protein ASPBRDRAFT_113195 [Aspergillus brasiliensis CBS 101740]	Aspergillus brasiliensis CBS 101740	99.3	710	3	1	1	708	1	710	0	1420	MAVGPVPQSNGASALSLVRQLSKDHDHVLKSFRLLISDLCQQFGGGHPGGAIGMAAIGVALWRYVMRYAPHTPDYFNRDRFILSNGHTCLFQYAFLHLTGYKAMTFEQLKSYHSDRVDALCPGHPEIEHEGIEVTTGPLGQGIANAVGLAMATKNLAANFNRPGYDVVSNHTWCMIGDACLQEGVGLEAISFAGHLKLNNLTVIYDNNQITCDGSVDLTNTEDINAKMHACGWDVIDVEDGCYDVEGLVQALEKARAAQEKPTFINVRTVIGLGSKVEGMAAAHGAAFGAPDVADMKKKYGFSPDEHFVISDTVREFFQDLPARGDVLVQQWNSLVKQYSAEYPELGAEFQRRMRGELPSNWKDLIPSSFPDKPTATRASSGLVFNPLAKDIQSFMVGT…
g310.t1	OJJ77099.1	OJJ77099.1 hypothetical protein ASPBRDRAFT_165710 [Aspergillus brasiliensis CBS 101740]	Aspergillus brasiliensis CBS 101740	99.7	388	1	0	1	388	1	388	1.23e-286	785	MAPSVLVSSPAPTSTSKASPTEQVTLSPPFPNPSLQITADHNLKFVPAPVYAPRRGEVLLQIKATGVCGSDIHFWKTGRIGELVFEGDCIIGHEAAGVVLKCGDGVTHLQPGDRVAVEPGVPCEQCFLCDDGRYNLCEDVQFAGVYPYAGTIQRYKVHPAKWLHKLPDNISYLEGALLEPLSVVMRGIQVARLHLGRAVVVCGAGPIGLIALAAARASGAHPIVITDIEPKRLAFAKEFAPWCHTYQVNPALDTEGNAKEIRKLFGPNEYNAPETVLECTGVENSVCTAAFTARRGGTVVVIGVGKAVMNNLPFMHISLAEIDLRFINRYRDTWPPAIACLSGGILDLKKLVSHVFPLEKAVDALNLCADPRNGSIKVTIVDEVEATL
g311.t1	OJJ77100.1	OJJ77100.1 hypothetical protein ASPBRDRAFT_36293 [Aspergillus brasiliensis CBS 101740]	Aspergillus brasiliensis CBS 101740	99.8	456	1	0	1	456	1	456	0	937	MRLVRDCLYGGLFLNTALFSQLAHAIDIDISSTSSIKDAASKTAYGSMTWYHGNETGQIPGAFPTKWWEGSALFTSLLLYWYYTGDSTYNDEVRQGMQWQAGDCDYMPANYSSYLGNDDQMFWGLAAMTAAEIQFADSSSGYSWLALAQGVYNTQVDRWDDSTCGGGLRWQIYPYEAGYAMKNSISNGGLFQLAARLARYTANDTYADWAEKIFDWCASTPLLNNQTWNVADSTDVDNSCKTQGNNQWSYNYGTFLTGAAYMYNYTGKAKWKNAAEGLLNVTLNTFFPSEYGGNIMSEVLCEPAEACNDNEILFKGLVTGWLGLVALVMPSTYDTILPKLQGSAEAAAASCSGMGNNTCGVRWYPKKWDGWNGMEEEIAVTNVLASALVNTKQTAPVTS…
g312.t1	OJJ77101.1	OJJ77101.1 hypothetical protein ASPBRDRAFT_50067 [Aspergillus brasiliensis CBS 101740]	Aspergillus brasiliensis CBS 101740	97.7	309	6	1	1	308	65	373	1.70e-209	586	MLAVGIRHGFGKHASTLATSDLEAFLKGDYIASHLYNVGLASVKLGILALYYRIFAIQWFRRTLIGCITFICLWIATIEIFMGLLCRPLEAFWDASVKGHCFDSSALSYYVNTSNMITDLVIFALPIGVIVRLRTTRSNKIALCIVFSIGFITCGISAARLAFVFAQSSSDITWDGVDLGVLSGFESLGGILCANLPIIYRLFRQAAQKVSRTGGSSSIPHMQYGRDSKNYTSRSRPRRHRLSETLNEQWIQLQNGNSSNDSHLPEGPNFAVQKVVDMETGMEVVRLSKVPNSITVQREFHQTVEDRQ
g313.t1	OJJ77102.1	OJJ77102.1 hypothetical protein ASPBRDRAFT_70608 [Aspergillus brasiliensis CBS 101740]	Aspergillus brasiliensis CBS 101740	94.9	548	24	2	1	544	130	677	0	1013	MRCQRSKNRCNYGVRLQWEDDMRAAGKCHGRTGTRDSLRCKEPEENEDLPPSKRIEHEDQPGSDGESALILTPPSSHSPLRATTSRSVSFPIRDTYQSRYHHWKESKIQSSNTSFQTLPWTLGVPDVDDVCLSFYESMMCPAAVTVDNEETNPLRNTVMRMVFRSELAYYSVLMTSAQYLRSIDSRFELFEMQVRQRVLKGLRQALAESCFEFEDVLLPTIFLCSSAISHSCDASWVRHLTCFQMVIKQRIRRHTTTYVPRLFMSYFSAHLVLAKSLFPIDKVLPVVELRSDLSSVEEDACWTSSESLSKAMEPDTLREIDVWNGMSNRMLLLINDILSLKDDAQALYEEGTEVEEKRSAIEAKIITLQRNLQDTTHLLPESLRRCQDSAELVHRRRLL…
g314.t1	OJJ77103.1	OJJ77103.1 hypothetical protein ASPBRDRAFT_165719 [Aspergillus brasiliensis CBS 101740]	Aspergillus brasiliensis CBS 101740	99.8	501	1	0	1	501	1	501	0	996	MSAADSTNSPPTEDEKNFAKGPDESIQPLSEREEKAIIRRIDLCLLPLMFFSYLLQYLDKTTLSYASILGLLSGTHMTTALYSWTSSAFYFGYLVASYPVSLGFVKFPLGKYLSTMMILWAIILTCHAAASNFAGMTALRVLLGVFESAISPGFTLVVSMWYTPSEHALRSCIWFAGNGVASIFGGVLAYAIGHIEDRLGPWQWLFIIFGLITLVWSIFLFFTLPDSPRNAKFLQPNQREPAYLRAQACQKSYQSREWKKDQFIEAWLDPKTWFLFVYNFMVSLPNGGITNFSSLVIESFGFDTFNTLLYSIPMAAVALVFLLISAITCNRFRGLRCYWMIITLLVSLIGILLMRQLPTERKWGRLVGVWLVSVFGAGWPLSLSLVSSNFAGFTKKSTV…
g315.t1	OJJ77104.1	OJJ77104.1 hypothetical protein ASPBRDRAFT_36299 [Aspergillus brasiliensis CBS 101740]	Aspergillus brasiliensis CBS 101740	99.5	420	2	0	1	420	1	420	1.14e-305	836	MHRPLTDSTLYRIDADILIPGRGAPTPHGAVIWKSKTIVYAGPQHEVPVEYRDAITTHVPVVMPGMWDCHIHFLGATAANMDSIVNTPQALAGARSVPDLYATIMAGFTSVREVGGYGCELAKVVNEGRIPGPTIYGAHSAISMTAGHGDVHGVHLEGLRDLCAHGLPLTIADGVPECLQAVRKQLRHGARVIKVCASGGVVSAIDDPQHQEFSFEELKAIVDEAARARRVVAAHCHGKAGIMNALRAGCRTIEHGSYLDEEAIDLMLEKGAMLVATRSVIESGLAMRDLFTPGSYQKLLEVADTHKRAYQLAVRRGVPIALGTDQFISSDNPALGYGRNGKELEYAVAAGMTPLAAVEAATANGPLTLGDQAPKSGQLREGFDADIIALTASPLDNIT…
g316.t1	OJJ77105.1	OJJ77105.1 hypothetical protein ASPBRDRAFT_113498 [Aspergillus brasiliensis CBS 101740]	Aspergillus brasiliensis CBS 101740	99.2	1432	11	0	1	1432	1	1432	0	2814	MNPPEFPEDEKSSDLPIPERKSLDTLNVPHINVREAPSAETLTVPHADAASAPGKDAEWSMTPHVIRSQEREAAAGFKKRELGVTWKNLGVDVLAAEAAVNENLFSQFNLPQRIRDFTRKPPLKSILTESHGCVKPGEMLLVLGRPGSGCTTLLNLLSNRRLGYHTIKGDVSFGNMSHEEAAQYRSHIVMNTEEELFYPRLTVGQTMDFATRLKVPSHLPDGAASVSEYTAETKQFLMESMGISHTADTKVGNEFVRGVSGGERKRVSIIECLATRGSVFCWDNSTRGLDASTALEWAKALRAMTNVLGLSTIVTLYQAGNGIYNLFDKVLVLDEGKQIFYGPAAAAKPFMENLGFVYTDGANVGDFLTGVTVPTERRIRPGFENRFPRNADAIMAEYK…
g317.t1	OJJ77106.1	OJJ77106.1 hypothetical protein ASPBRDRAFT_36301 [Aspergillus brasiliensis CBS 101740]	Aspergillus brasiliensis CBS 101740	98.4	440	7	0	45	484	1	440	1.43e-300	827	MRGCFGNSALLRLHALFSSSSFSLLSILLSNPPHPFSLLDKDTTMNLRQINAHNLSTFRHHYVSEISGSLGDLGTFLPIAIALAVNNTVSLSSTLIFSGLFNILTGVFFGIPLPVQPMKAIAAVAIARSFTNGAIAAAGLFVAAFILLFSITGLLTRFANAIPIPIIKGIQVGAGLSLIIASCNSLLSNLSWLSPSWADNRLWALAAFCFLLSTTVYRTVPYALLVFLLGLIFALILSALASDLPSLSLWHPYTVLPIGSDWSMGIIDAGIGQIPLTTLNSIVAVVHLAHDLLPSTTNSSHINVTSIALSVSAMNLLGCWFGAMPVCHGSGGLAAQYRFGARSGASIIFLGILKLVIGIFFGESLVGLLKRFPTALLGVMVIAAGMELLSVGESLNTTG…
g318.t1	OJJ77107.1	OJJ77107.1 hypothetical protein ASPBRDRAFT_190444 [Aspergillus brasiliensis CBS 101740]	Aspergillus brasiliensis CBS 101740	93.1	261	18	0	1	261	1	261	1.01e-132	385	MESEKRKYAAGPSLPSTSEDDSSKRRKVIGPALPPPSDANAPDNSSSEDDSDDDDFGPSLPPPEGTVPSVPSSSATQATPSETTSEAAKQPQRDAWMLEPIDGSNRNSRVDPTKLRNRKFQTGRAANTTPSAGGLDVSWTETPEQKMKRLQDEVLGVQTRPTAPDAGDSAGGARGAQPSRAMQEKIHRFNEEKRKEEAKARDAEKKKKKQEGEEEEDDPSARAFDKEKDMALSSRITHAQRREMMNKAADFGSRFTSGKFL
g319.t1	OJJ77108.1	OJJ77108.1 hypothetical protein ASPBRDRAFT_190445 [Aspergillus brasiliensis CBS 101740]	Aspergillus brasiliensis CBS 101740	99.4	504	3	0	1	504	1	504	0	971	MPLLYVRAVVPFEAGANATDVLINEVHFNRTALEYYHYTLFSNGTLSNGTDCYLAFNEFKPHMENGTLIKGTSCYAPIRDLGQHASAGIAFAFMFVFAIVFTLINMRKHSRRYLPVDRRWKLLGRRAKWIWMLFIAACGIISCFMSIDVDRGYIVSVPLILQCVFYTLLTPGMMAAVWEAVRHWGSWQERQIYDRDPYAFQVSSSRQGQEFVLPIIFYGCALANFVLTVPRSWSAIELQRSLDQQLNEAKPVATDVRWRAAGFVAVAGVLVICYSLEHSIYRYRARPTSTMGQLLFYLNAAPSQFLIAIALLGVKIGYAIASAFDWTVSPLRYGVSSGWLYGLGYTPVLLLLILFNICGYCELNEDKALIVQRDEFNHAVADAVGVGQRKPSWWKKSRT…
g320.t1	OJJ77109.1	OJJ77109.1 hypothetical protein ASPBRDRAFT_50074 [Aspergillus brasiliensis CBS 101740]	Aspergillus brasiliensis CBS 101740	98.6	419	6	0	22	440	96	514	1.63e-299	825	MVLRTFLWTDGPARLIACPHVGPVVRVGPQAVDIAGIAEAREIHRIGSGFLKSPIYELLKHDNAKSIFSTSDPKFHSKHRRLLSSPFADANLHSLEPLIEARIRFTMQRMEEEMSTRKVADVQKWFFFMSSDIIGELAFGDSFRMLEQGKKNQYTKDLEIAALVGESRVAFPWLFRLAEFLPLPLLGEANKSRNRIVDYADESINRYKRLLSASPDNVKPTVFTKLYSAGKEGLSDAEIRDDATDLIVAGSDTTANTLTYLTWAVCKRPVIKQLLVAEVSTLPEQFSDKDVQNLTYTNQVIDEALRLYPAVPCALPRVVPPQGATFSGHWVPGGSTVTTQLWSLHRDPIAFPEPEEFDPCRWASPTKKMKDAFMPFGAGTRNCLGMHLARIELRLATAH…
g321.t1	OJJ77110.1	OJJ77110.1 hypothetical protein ASPBRDRAFT_36305 [Aspergillus brasiliensis CBS 101740]	Aspergillus brasiliensis CBS 101740	97.1	721	16	2	1	721	1	716	0	1285	MPREKVKRGRRATEKANKEASKRKRDEAPEDVVPKRMKPSDDETNDFVNGADYIALDDGQQQQQEEEGGVQTGDMPFYGLLDPEEQEYFSRANEVLETNQFGDAEERRVFVESVYKEAEGKELKIACSQSCSRLMEKLISMSDIRQIRRLFNKFIGHFLHLVQHRFASHCCETLFIHAAPGVSQKTSKSKASKNDTEEGDEPEPELSLAEMFMKVIEELEGNWGYLLTERFASHTIRVLLLVLAGEPVDLSLSDSVVASRKKERHGVLNEVQEENPVAQKRSVPESFEDTLKKVMQDMVSVLDDTYLRALATHPVGNPVLQVLVYLELSHFGKASAKDPKSIIRRLIPDDTFEEGTESTVFIRGLLYDPVGSRLLETIVRYMPGKLFKGLYKNFLRDQL…
g322.t1	OJJ77111.1	OJJ77111.1 hypothetical protein ASPBRDRAFT_140644 [Aspergillus brasiliensis CBS 101740]	Aspergillus brasiliensis CBS 101740	100	656	0	0	1	656	1	656	0	1185	MLGAFRRSGAVHALRASRSLLARSTPQQPQWLSASAPAVSYVARALYHPSPAFLDATAAAQAQLKVAADIEPRLPSTKFYSLAQDGLVNDKLIRTVTNTMNIETMTDVQAKTIRETLSGDDVLAQAKTGTGKTLAFLIPVIQRLVSDPSIKRSRPSYRGHQGRRNMPADIRSIIISPTRELAEQIAHEAQRLVSGLGLTVQTAVGGTQKRLHLNKIRNEGCHILVGTPGRLKDLLSDPYSGVSAPQLQSLVFDEADRLLDDGFSREIDEIKELLPNPSEVDRQTLMFSATVPGEVMDMVRQTMKPDFKFIKTVSEDEVPTHLRVPQKVVYLDGFQNGLPAILELAKQGYARTPNFKAIVYLNSTTMVSLANDMFRRLRNDPEDRTKGHALGRLPILQIH…
g323.t1	OJJ77112.1	OJJ77112.1 hypothetical protein ASPBRDRAFT_113931 [Aspergillus brasiliensis CBS 101740]	Aspergillus brasiliensis CBS 101740	99.6	454	2	0	1	454	1	454	0	888	MQPTPVPRDILIVGAGIAGLASAISLAKELASSVPDLKISVFEGAPGLSASGGAISLTPTAQNYLDKLGVLSELNRMGSEAGIEVDLIELFSLRSGRKLGPLKFTDENGFGYGGYKGRRVMRYALSRAMLSVIQSHLPNVSVYYDKKVVGGTTTDSSVTLSFEDGSFATGDLVLGCDGVHSITRTRIVDPGNRSEYTGISFIQSVTDAQDLSIPMHFNQTAIHLTRHSSLLTSYCDPDRQKIFSAAILRVNEHLIERYQATSKSDCPEQASMKMSIRYLVRTQFAKSSLPSIRALLDHTEDWVLYPVYQVRQRGKWHKGRILLLGDAAHAMPPRDESAAYSIEDALIFTQIFSRNLHAPLATTFQQYESMRRDLVNKVFDASRRLWQSDLDKGLFPGHV…
g324.t1	OJJ77113.1	OJJ77113.1 hypothetical protein ASPBRDRAFT_36309 [Aspergillus brasiliensis CBS 101740]	Aspergillus brasiliensis CBS 101740	87.3	276	11	1	1	276	1	252	2.27e-119	352	MNIFDEEASTITLSTPKASTTGTTIAIILEELRLPYILHLLPHNHHHHASPITTTTTTTLTDIHRTGHGTTLHSLPSITTYLLTRYDSDHHHLSYPPRSPEHAVVEERLSKLADRMGIAHDHDHEHEDKHDSHSHKQQKQQQQQQQQQQQQQQQQQQQQQQQLPIIKETEVEDTTGSSSSSSASATAKETIPFARRLLSLYLHLEEYLSRQRRGGSERWLVGEKCTVADIAHFPYVAAAGQYGFDLERFPEVTGWYDRLMRRRGVRRGWERVVEGE
g325.t1	OJJ77114.1	OJJ77114.1 hypothetical protein ASPBRDRAFT_112692 [Aspergillus brasiliensis CBS 101740]	Aspergillus brasiliensis CBS 101740	99.6	901	4	0	1	901	1	901	0	1694	MAIHDVGLEGLHQLFQRSSSDDPQSASNSASGLVTTLVPSLISAVAMVIIFIILRRSESRMYMPRTYLGVLRPSERTPASPTGLWNWILGMYRLPDEYVLQHHSMDAYLLLRFLKVVSMICFVGACMTWPILFPVNATGGGGRSQLDMLSMSNISSDKYARYFAHTFVAWLFVGFVFYTITRECLFYINLRHAYALAPAYASRLSSRTVLFTAVTKEYLSREKIRQMFGPEKVKNVWLTTNTSELDDKVAEREDAAMKLEAAETKLIKLANAARLKALKKQGSLEEGPNAGDTLCDDDDESGSVAARWVRPQDRPTHRLTLLVGKKVDTINWARSEIERLTPEIEELQAKHREGNAELVSSVFVEFHIQADAQQAFQSVAHNYPLHMAPRYIGLEPTQV…
g326.t1	OJJ77115.1	OJJ77115.1 hypothetical protein ASPBRDRAFT_190452 [Aspergillus brasiliensis CBS 101740]	Aspergillus brasiliensis CBS 101740	97.2	536	5	1	1	526	1	536	0	1020	MSADRHPLADPTPLDSTSGVRVDELTNTLSSGTSSDPPQIPVRIRRRRHLPMSDDQSSRNQIFYFVDSNSSSREKRAHVMRHHVQEKRRQRKSSHSRADGDRRGSRPLRYSPWPHKRTDVDNHDDYESIAPQELPTETAGNGHSLIPFGLPPVQSPPESVDGYQSPSPVTMLDASRKDPFSSLPGIYSRDDHELVDYWTNRLTYWSGQNNYIKDLVFKAAMSHPLCFQAVILAYCARWRAQLYNLKDSKEAQYHLDKAVKGIEEARIGFAGVDEDNLALALSGMSLHEDRFGDKQVARKYEDQAVEILRSRSGTQSTVEVFMHYVRYVMIPPPMEMSEEGKRWLVSFLHAAEQLMHQHSSPSYLGSVPQRRTAFQMDSPLFPLLSSGPRPSHVPQEYRM…
g327.t1	OJJ77116.1	OJJ77116.1 hypothetical protein ASPBRDRAFT_115270 [Aspergillus brasiliensis CBS 101740]	Aspergillus brasiliensis CBS 101740	99.7	962	3	0	1	962	1	962	0	1853	MSSLFDAVLQSELGSTAGSRDHRLHSDQIPSSRPQPPSESNGPMSDMHGFADDQVADSSASTVTRLRNPYLPGPPPVSDVAGEKVQQAFAELLETYQEETPSSAQGAPSSQVLSDKYYIAQIMGMAKWELSTLYVDFTHLTSMSNPILADAIANQYYRFQPFLTKALHDLIAKYEPDYFASHRQATAAGSVSSQAGTSMIAGNSSVSDNPELERNIREKTRHQQTDKLFSLAFYNLPLVSRLRQLRTSQIGKLVSVSGTVTRTSEIRPELSLGTFICEECKAVVTNVEQTFRYTEPSQCPNNTCGNRSGWRLDIGKSTFVDWQKVKLQESSHEIPTGSMPRTMDVILRGEMVDRAKAGERCIFTGTLIVVPDVSQLGLPGVRPEAVRDDGAFRGSDIGG…
g328.t1	OJJ77117.1	OJJ77117.1 hypothetical protein ASPBRDRAFT_112628 [Aspergillus brasiliensis CBS 101740]	Aspergillus brasiliensis CBS 101740	81.8	1221	57	3	1	1141	1	1136	0	1854	MEDLNKESKPPKIAEESVAGSGDVQEPDKQGPSLEPESLDPSQILLEAIDRRRQQCNPRQAFLYSRLGFDTNNPVPHTESAPFATPFVQDDQIAAAQAMFNESLFVPQEDPLPWAFPPLGTDAPPMSPVDRELLDLLQDYVQEGATTPPMQLPSQDLPHSGSSSSQTEHAGTTATPADNQEEPKPTASSCVEIISSSSSTSGDTDVPVEDFPDDAGDQSCPKEWPDEELEASTRADLSKSKFNAIKKWFNGLEKPSVADQIRFETAKQQEHARKNRVARRKALENQSDPFCSDIDELDEFSSGQVPPEQNTESSQNAPIKPQPKKRRQNRISAEEKRKSKELGLAVVTGRQKKSMMPKRAPRKRKERGFDDGTPGPSKKSKQASFGTKKYLESLLSSRV…
g329.t1	OJJ77118.1	OJJ77118.1 hypothetical protein ASPBRDRAFT_654288 [Aspergillus brasiliensis CBS 101740]	Aspergillus brasiliensis CBS 101740	89	464	48	2	1	461	1	464	6.57e-213	605	MTNITSDHMDQDMNTTTTTRKRRATCDNDNDGSNNTSTSTLSNTTTPNATNNETTHQPFKRPRLPSPFTRQAEHLEEALNKEIQEQEDALRMNEYRMLAVRALDNEAHDRAFRDAMELGSAYQQQQQQYTSSHPPPPAFATATVDEDMDLDMDDYNPQHEGHNGNGGDREMVAPAVADAEEEGDTQLATTTRSGCLTSIIGTNNINHITRPRTNNNNNSHNNMNGFTIYEDLETDPAGLLRSGYTQLSLGLLQPEYYHYHHHNHNNNQEVRAYQDWDEDKENHNNVLHDDPDGEEERRRRRIPFEMLTETEAESFSQVVDSYHSNAEADADAATYVNAVDDDEMRMDDEEGGGAAGGDSESGRWSFGVSPWRVESESEYADTEVDPDEAGLGLQDYSHR…
g330.t1	OJJ77119.1	OJJ77119.1 hypothetical protein ASPBRDRAFT_60768 [Aspergillus brasiliensis CBS 101740]	Aspergillus brasiliensis CBS 101740	97.9	776	16	0	1	776	1	776	0	1455	MARRYQIDELLWLRSSPLVTKPTNLPPVEDWMGPIPDPATQRKATNPRDPNNPHESTPRRPSLFETRHVSRNSNSEDIILGPPKTAFASASRIPGKGSIDATERSSRPNDQDDSKNDRFNLREKFFKDRETGDRDFDRRDGKLGTFNNRRGDKEDWNSGRPRRTFGPDEQDRKPRRNGEFDRWENRDQREPNNDRGVKDKDARFFPRKDGTPGRARHEGSWFRDENTHDAPEAEEEKTPIRNREWRRDRHGADRDWTRGAKFEQDPEWMDSTDRDEPRRVHTQEDFERWKERMKAGSSQVQAEEKEVPLETAPAPAPAPKPEPRPTDGEIFSSNGTPFTSDSAMERFFGLLGDAKPAPAPQPPQEISAPPMMEPTPKKEPLPGKLGKSSRFAGLFSPPP…
g331.t1	OJJ77120.1	OJJ77120.1 hypothetical protein ASPBRDRAFT_140664 [Aspergillus brasiliensis CBS 101740]	Aspergillus brasiliensis CBS 101740	99.1	1121	10	0	1	1121	1	1121	0	2157	MSSHEGQLRNKRRKLDNGQEVDATATISSHTQLRSLLAFQQNPHESKQGIRKFKDFLTSIGQTEDEAEKSKKFRILKAYCDSQFSRVNENEAVCFTDLVQTWGFADSNNNESLLTVVPSVLAQFIRTVSSNLDFRDFGVALCKYLLQKEQLRLFNRGLTAIKSKEHLISPCLRLLTEMVSFDGGAVARHVHAARYITFKRIEVFLTPNKAQLEEISMEGSKPTLRRNAQKYVLANLRFLQSNGKSDIIEQHKVIRAFLEFIRKDSRDIVLETIRCIDKDIIQDASISRIAKSKFFNRWNLERLVTLYGYDRDSEEPNPANVSTADEIHKILMNVCTNTELGVLLPESGWYPHGSDPEALPTDDDTLIDLGLDSALHVDKYSQSVPVRNGTLSYLIQTLR…
g332.t1	OJJ77121.1	OJJ77121.1 hypothetical protein ASPBRDRAFT_24828 [Aspergillus brasiliensis CBS 101740]	Aspergillus brasiliensis CBS 101740	90.7	151	14	0	1	151	1	151	8.55e-94	278	MPQTHTPITKDSLIGTWSLISYFAEAPDPQDDDAPTHYPMGPDARGTLVYTPDGQMTVSVLPKVTKKAWEKSNDGVMYAGRYWIEDSNSDDDDGDEDEKQQPGGVPIVHHEVEMASSVEFEGSQKREAMISPEGRLRLSGLRLLEVGMVSY
g333.t1	GCB19246.1	GCB19246.1 pre-mRNA-splicing factor ATP-dependent RNA helicase prp22 [Aspergillus awamori]	Aspergillus awamori	98	1238	18	1	1	1238	1	1231	0	2336	MDDLQSLELFSLVSRITSEIQNHLGVNDKTLAEFVIDQHLKCGSFADFSKSMEEMGAEFPRSLLESIDRLVLTMHPKYKSKKAETTNTSGGDDDMDVLDALEKKARVFKGLAVPDKVQQWDEEEDYIQRRDVEEGDAKADAMDDTFAMLEGLAGKARQEKPAPAPQSSSRNDRGSTRKRSRSPDYDDSRRGRRRHDRYRSRSRSHSPRYSKRGGDDEVDEFGRSKSKYSSRDDYRNGHSERRSRRDRDEDGEYFRKPPPMELDDQPVLYKVYDGRVTGVKDFGAFVNLPGVKGKVDGLVHVSAMQEGARVNHPSDLVSRGQPVKVKVVSIQGSRIGLSMKEVDQVTGLDMIPQRRLASGANMERLDGMTGKDRYGNLSSEVPVIEESDGKPMKNRKRMT…
g334.t1	OJJ77122.1	OJJ77122.1 hypothetical protein ASPBRDRAFT_202163 [Aspergillus brasiliensis CBS 101740]	Aspergillus brasiliensis CBS 101740	99.7	643	2	0	1	643	114	756	0	1214	MLNACKMDERKSVGPLRHIKDALHRSYLQNGVRGLINELEFHMYAEDVTSRYSAPNLEAQKKVADLRRPAEWYPQARALQRTIHLHVGPTNSGKTYHALKRLEASKRGFYAGPLRLLAQEVFHRFQANGTSCSLITGDDVKIPEDGKPSRIVSNTVEMVSLGDQYEVGVVDEIQMIADPHRGWAWTRAVLGARATELHLCGEVRAVPLIKELAALTGDKLEIHRYERLNPLKVQNRSLKGDLKNLQKGDCLVSFSRVGIHALKADIEKTTGKRAAIVYGSLPAEIRTQQASLFNDPDNDYDFLVASDAIGMGLNLSCKRIIFETLIKRVPGGLQRLSVPEIKQIGGRAGRYRSAAQQQEDGSRSDDDTNVGYVTSLEDIDLPYIREAMESEPPPLVSAG…
g335.t1	OJJ77123.1	OJJ77123.1 hypothetical protein ASPBRDRAFT_226627 [Aspergillus brasiliensis CBS 101740]	Aspergillus brasiliensis CBS 101740	91.7	697	9	1	1	648	1	697	0	1192	MSTSILNIQRDLILNTIRYAAGNEWKVLVVDETSRKLIDNAVSEDDILNLNVTILDPQQRARLDRSQLARDQIANVQIMNADYFPRESRLITFRDPWSFPVLFHPGCNHLIRAHLEGLAQKVVSLCASLGEYPVIRYYRPRAPTHEASVLCSHLARFIQNELDQFAQYQRDFPPPSPRPRGVLLVVDRSMDLVAPLLHEFTYQSMVHDLLPISDGDKVTYKTVINEGSHNEEIKDMEINEEDNVWVEYRHMHMKDVLGKLGEDFAKFRAANPQFAEDNDKANVSTIKDMLAGLTEFQKGRDAYTLHLNMAQECMSYFQKHKLLEVSSVEQCFATGMDENYKKAKNLASQLVQLLDDDAIKQPERLRLLLLYIIYRGGILAGDIRKLLAHAQLAPQDGEI…
g336.t1	OJJ77124.1	OJJ77124.1 hypothetical protein ASPBRDRAFT_24832 [Aspergillus brasiliensis CBS 101740]	Aspergillus brasiliensis CBS 101740	98.1	259	4	1	18	275	17	275	1.53e-173	490	MPPPHHPNQEEYDNDDDEYFLPLEDQRVFGAGIRRKRVPFVRSSEQQHLSTTGDFTRVSSEPPAAPAGQSIANKYLSIVLSKPASSPATPIQSQSTPDSEPTSDSHPHSDKDAAEICPVCNLPYTTPTPSTSLEGEEGEQKRHIHEATLPHQLSLPHSHPPSHLDRTRPGLRYLAAYGWDPDSRVGLGPQGREGIREPVKGKLKEDTVGLGAVVPDVKAKDKGGRGVQKNTKQKEKKILNAKEVRRGQLEERKKGERLRELFFQDEDVLRYLHGK
g337.t1	OJJ77125.1	OJJ77125.1 hypothetical protein ASPBRDRAFT_140674 [Aspergillus brasiliensis CBS 101740]	Aspergillus brasiliensis CBS 101740	92.1	445	2	1	1	445	1	412	2.21e-287	791	MPIPIITQAITEGTSSIPHLWTILKYLPWAVLLAALKYYFGGARNTSERLMHSKIVMITGGTSGIGAQVASSLASRGAQIILLTQHPPTDIFLAEYIEDLRRSTNNQLIYAEQVDLSSLHSIRTFATKWIDNVPPRRLDMVILCGNAAPPVSQKRKLTVDGIDEEWMVNYLANFHLLSILSPALRAQPAHRDVRVVFTTCSSYIGAKWDLRQVEAAAAITAANNAAEEEGNNKNNGGEGRRVVMKNGKLQREKPKAKKKTMKGVSLYGLSKLSLMVFAQSFQKHLNAFKRPDGQPCSARVIMVDPGFSRTPGMRRWMTGGSLWGLLVYLVTWPVWWLVLKSPQQGAQSVLYAAMEAEYGRGEGGWMIKECKEVDVARKEIKDEEAGKMLWEFSEKLVEL…
g338.t1	XP_001401007.1	XP_001401007.1 hypothetical protein ANI_1_558124 [Aspergillus niger CBS 513.88]	Aspergillus niger;Aspergillus tubingensis;Aspergillus niger CBS 513.88;Aspergillus tubingensis CBS 134.48;Aspergillus luchuensis IFO 4308;Aspergillus luchuensis;Aspergillus luchuensis CBS 106.47;Aspergillus welwitschiae;Aspergillus phoenicis ATCC 13157;Aspergillus niger ATCC 13496;Aspergillus neoniger CBS 115656;Aspergillus vadensis CBS 113365;Aspergillus eucalypticola CBS 122712;Aspergillus cost…	100	371	0	0	1	371	1	371	1.40e-272	748	MPAGSVLVTGGTGYIGSFTTLALLEAGYKVVVADNLYNSSAEALKRIELISGKKAEFAQLDVTDEAGFDRVFEAHPDIDSVIHFAALKAVGESGEKPLDYYHVNVYGTICLLRSMVRHNVTNIVFSSSATVYGDATRFPNMIPIPEECPLGPTNPYGNTKFAVETAITDVINAQRNNAIKAGNEAEAQKWNGALLRYFNPAGAHPSGIMGEDPQGVPYNLLPLLAQVATGKREKLLVFGDDYASHDGTAIRDYIHILDLADGHLKALNYLRANNPGVRAWNLGTGKGSTVYEMIRAFSAAVGRDLPYEVAPRRAGDVLNLTSNPTRANNELGWKAERTLEQACEDLWLWTRNNPQGYRQQPPAELLEKLQK
g339.t1	OJJ77127.1	OJJ77127.1 hypothetical protein ASPBRDRAFT_114751 [Aspergillus brasiliensis CBS 101740]	Aspergillus brasiliensis CBS 101740	99.6	506	2	0	1	506	1	506	0	1019	MALEYSHVWLAFIGLASLYVLRSLYRLYFHPLSGIPGPKLAAATHLYEFYYDVICHGRFLFQIEKMHQQYGPIVRINPREVHISDPSFYDEIYASSTRKRDRDSFAYGAFALPYSMIGTIGHEHHRFRRNILNDFFSKRSVLAISDFIEERVEKLMGRFEGFYRDQSVVNLSDAFAALTSDVITYYCYGKRWGFIEDKDFRSDVHGGNEENTGLGHVNRFFPFFPETMRKIPLHLMALCLPGRAGMLQFQGSILSTISENTHDGSKVPGKEDQTIFKRLTDPSLPAAERSRRRIEDEVFTLLGAGTETTASTLMIMTYYVSRDKGIRDKLQSELKQVLPTPTSTATWPELEKLPYLTAVVNESLRLSYGLIMRLPRVAPTETLKYKDYVIPPGTPMSTS…
g340.t1	OJJ77128.1	OJJ77128.1 hypothetical protein ASPBRDRAFT_112351 [Aspergillus brasiliensis CBS 101740]	Aspergillus brasiliensis CBS 101740	93.7	539	6	1	1	539	1	511	0	1006	MELMGCVVVALAGYIIYQLWVHPLSCYPGPFIAKLTNLYSVVHAIRGDRHEDLYHLHQRYGPVVRIGPQRVSILDAKALESIYGFHANVQKAKAYNIFYGVSIFNAIDRTVHARKRRVMSHAFSSQALRGMEPHILSAIRDWCAALGDRHPDGQVLSTPSSPGGWSKPKDMVHWSACVVFDALGEICFGKTFNTSLSDANHFFFPLMALNLRIMNICGQMPLLQTLRFDKYLRRGTVANRQRQIDFSRQQLRTRLAVESTQRRDIIYYLQQARDPKTNEGYSEAELMSEVMTLLGAGMFTVSSRVWLWPNLNPFRWRTHQLNLLGSDTTNTTLTAIFYYLAYNPAILARLSAEIRAVFPTLEAIVAGPDLSQIAYLHACIDETMRVCPPVPTDLPREVL…
g341.t1	OJJ77129.1	OJJ77129.1 hypothetical protein ASPBRDRAFT_190467 [Aspergillus brasiliensis CBS 101740]	Aspergillus brasiliensis CBS 101740	99.2	842	4	1	1	839	1	842	0	1527	MSFFGFNTTLPRDRAPAGERRGIFDTPDPFAEVARARAEGFQGGEEDDVIDFEDTYDGLGDQLDDDQDAFNDDTFGGGLDTGAVGKDFDFFGKTAQVADVIGEEQIRYSLQKPGAPATAPSQPAADTALPDPAAQKPKRTGYEKYQDPGYIPDLQAKSSVWGMSKKPEQQFQQQLQQLQLQQQQSPTPQMVSQAKKMLSLEEVEAQLRRQGPTSLPAHLPLSLPQSMPEPTQPLQRAQMPPLPEGFPQLPPEILQAQFAKGVPPAQLLHQPPIVPEPYPLPPNLPIHMLQNANLPPQHMVPPQRQAMPPAAQRPQQQQQQQPPLPQAPRGNNAQLPVITNSQQLMHLTEEQRIAYLMEDAKRAKRNHKIFLLSKGNGLMTPQDKNFITRIQLQQLVAAA…
g342.t1	OJJ77130.1	OJJ77130.1 hypothetical protein ASPBRDRAFT_227022 [Aspergillus brasiliensis CBS 101740]	Aspergillus brasiliensis CBS 101740	100	392	0	0	1	392	1	392	2.00e-303	828	MAIGPLRYLLFAITGLALFFLISRSAIPIPENIGTKLNPATYKDSFSASHSSQNDALSSSGPIKDIPTDRVNATFVTLARNSDLWEMVKSIRTVEDRFNHNYHYDWVFLNDKPFDDEFKKVTSALVSGNTHYGVIPKEHWSYPEWIDQDKAKKVRQEMGEKKIIYGDSESYRHMCRYESGFFFRHPLMLNYEYYWRVEPSIELFCDVSFDPFRYVKENDKKYSFVLSLYEYYETIPSLWDTVQKFMEEHPEHVADGNSMGFLSDDGGKTYNKCHFWSNFEIGSLEWLRSKEYIDYFETLDHAGGFFYERWGDAPVHSIAAGLLLKKEQIHFFNEIGYYHVPFTHCPTGEQLRLDLKCHCNPKDNFDWKGYSCTSRFFEVNDMDKPKGYENES
g343.t1	XP_025474475.1	XP_025474475.1 30S ribosomal protein S12 [Aspergillus neoniger CBS 115656]	Aspergillus neoniger CBS 115656	98.5	205	2	1	1	204	1	205	2.57e-121	352	MAPLVSSLALRTLRTLVQRPAALKSTSCSITTLAAAAPRRPFQPVLRTPTAVAAAAAKTSISSSSSSILRQFSTSPFRQATYNQVRRGCRTAQRARRSRSPALIGRSQMKGVCLKTGITKPKKPNSGERKTARVRLSSGKVVTAYIPGEGHNIQQHSVVMVRGGRVPDCPGVKYHLVRGAMDLGGVASRLNSRSKYGTKKPKKD
g344.t1	OJJ77132.1	OJJ77132.1 hypothetical protein ASPBRDRAFT_190470 [Aspergillus brasiliensis CBS 101740]	Aspergillus brasiliensis CBS 101740	98.8	167	2	0	2	168	11	177	1.74e-110	322	MSLRIAPPSSNPTQTTNTTTRAAIHLPHPSKGAPSAPGLPDTLRDNITLPAARGPPSTASATPSSTHPLEARLLAWRATQDAMKMESLRRAYGIAEPVRRGMELKIVRDGTFRPAALGGVGMGNLHEDILVLGGRDAEVGWEDVFKGDEFREPPAFHDEMEKRLRMDH
g345.t1	OJJ77133.1	OJJ77133.1 hypothetical protein ASPBRDRAFT_24841 [Aspergillus brasiliensis CBS 101740]	Aspergillus brasiliensis CBS 101740	100	254	0	0	1	254	1	254	4.65e-169	477	MSVTEDTKADPVSPTPESNLTSQTTTIAAPSSEEPQELPSAAPHPDHNQAESQEPSSLDAKPTDNNGDNTSAPVPKQVPVDAAPSASASPEQNDEAKAPAAGSEPSSQVSDEAAKEEEDTGPSLVITLLLITGSRHPFKIDGKYLRKRSVNVENYDPFAMSVYTLKELIWREWRQDWEPRPSSPSSIRLISFGKLLDDKAPLSDSKFSRDAPNVVHMTVKPQEIVDEEDAKSKPSYPRERESSERSPGCRCIIQ
g346.t1	XP_041151421.1	XP_041151421.1 uncharacterized protein G4B84_011947 [Aspergillus flavus NRRL3357]	Aspergillus flavus;Aspergillus flavus NRRL3357	62.1	1016	308	10	1	1016	3	941	0	1186	MLRQSLSIAKKATRKLYAHDDSSDLSLDLNITEPAVFVPTFTNKPAVLRGTCQLRLKDNLTVKRLTVNFRGTSRVTWPHGLHDTQTVTDSTLTLVSPQASDPAPPCYSSALSEGKESTWHRDRRKLRNAAPSTLCVDGNHGRAAGPKYQRLSAGTHTYEFEMLLHSHLPESVEIRQSHVQYRVRACVECPGFLRRRFAKKQAIATVHCPAEDDVEDAEPAYIARAWKGLLHTGILVSRRGAPLGDRLPVTVSLTELRGAEYRGLQVFLSENVQYHQKDGLACCPGPFRRVILYEKVEKAGSTMALHRAGNVDDERPASASKGNGAFAKMVGDPEIPSGPETTAEETVLDLTLQLPDCHLHCVSTGTQGMHYDTQYKNVRAAARTTGPNAAGGRESFGGA…
g347.t1	OJJ77137.1	OJJ77137.1 hypothetical protein ASPBRDRAFT_111889 [Aspergillus brasiliensis CBS 101740]	Aspergillus brasiliensis CBS 101740	90.6	817	70	5	1	813	1	814	0	1430	MADTEPRKRRRPAKSCEQCRQRKVRCDRNVPCGPCTRARSSLGCSYRRDSRSPTPADHRTSRLISHEPQRNARSYPLPSGIPDGPTGSLDETPHIRPHCSSKDCISSQLGSTIRDLQLRLQRLEDRLTATEITRPSAPDSDIQQALRELCDKVQSLEQRLLSCTNPSPAPNGDMSIAATPPRLHTSAKKMKLFGPTHYVHTMDKLQLVGSLETRGPQPLCPELKAELTAQIKELRYLRGSVKAVQSPRLNDPVPDLLSTIPVRSVCDELVQCYLRTFEGIYRIVHVPSFNKEYQQFWDQPPVTPTPFLVKLALILAIGTTFHPQRGKAGKEYDTRLIQTWIYAAHWWLTGPTEKSTFNLDGLQIFCLLILARQMGTPGPSLHLSAGALLQTATAMGLHR…
g348.t1	OJJ77138.1	OJJ77138.1 hypothetical protein ASPBRDRAFT_113553 [Aspergillus brasiliensis CBS 101740]	Aspergillus brasiliensis CBS 101740	98.9	467	1	1	1	463	1	467	0	907	MSYKAPTVTAVSAPGKVLLAGGYLVLDRDYTGTVFALDARIHVIVQQLRRSHRSDEQASEDVIVVRSPQFVDAVWEYGIQRCDNGGGVKVVQKGDGRANPFVETSLNYALTYISYVAASKDFGSLSITILADNDYYSETAFSKISGLQSPGRFVNFGVPLHEAHKTGLGSSAALVTAFVSALVIHRTLQPEDLGAAREKLHNLAQAAHCAAQGKVGSGFDVAAAIYGSCLYRRFSPSILESVGDVGSPGFEERLFAIVEDADPKHSWDTECLDFGMKLPRGMQMVLCDVECGSQTPSMVRKVLEWRKQNPEESLMLWQALQSNNERLCLELKQLAQSPDAEAPNSFDDTRRLIERSRDLIRTMTQKAGVPIEPKVQTELLDAICSIEGVVGGVVPGAGG…
g349.t1	OJJ77139.1	OJJ77139.1 hypothetical protein ASPBRDRAFT_112989 [Aspergillus brasiliensis CBS 101740]	Aspergillus brasiliensis CBS 101740	99.7	1274	4	0	1	1274	1	1274	0	2382	MVFKPFTHLARQSFTKAFTHGYAQSVVAASQSSYASTTTFNQIASQPAKLSRTTQLQNVFQPSSSSGAGAKASQGTSGSGDLGLAAYYAAWQHAQQTGDDSDWKQMQLKRKVGWKPSLNEDGVKSKESDNLPSADNNFQNSPHITKASANADVSAKVEEAVAREIQIQEEQAQVDEASEAKENSDTEAFPELPPDVAAVADASAEQSRIASEQITDLASGKRYAEVPIAFATLLRDGLTPTVGAYNALLESAIQLHGDTAQAIQKALDVYSDMLRRRVVPDEQTYQTLVQLFVVRANDAIKSKSLLEQERVRYGGMEEPGKFMLHSSELERAILAEDHSLGIAMKLFNTAAMRHADLVFPLDTYRHLINACAKEGQVEDMIRVYGHMESHKVTPHASIF…
g350.t1	XP_025390019.1	XP_025390019.1 pyridoxamine phosphate oxidase [Aspergillus eucalypticola CBS 122712]	Aspergillus eucalypticola CBS 122712	96.7	369	10	1	1	367	1	369	3.63e-262	722	MNPGSLPDGPNHDAKHPKKLIFAPGDIQPTSDPKITPTETPDPSATAIGVTTAPAPISRLAAEALRSNTSTPDSVAENEIVSHPARAHQFVSNPPLTISQMHPTNPLHQFHNWFRDPRLLPSSAPETCTLATASMPSGRVSARVVYLKELDERGWVVYSNWGSREGKGGQVFGNHADGEDTLSAMPEPGQDESLQAGLQEGNKWAALTFCWSNLERQVRIEGLVEPLSRDESEMYWRTRERGSQIGAWASWQSKVLWSMEPELLLDRRRKSLDPTLCPQMRVRGDVDATDIDDGRALLEKRVKEMEERFAGVEQIPLPPFWGGVRLVPESVEFWQGRRSRLHDRFRYVRVHVEEDGGYRWRIQRLSP
g351.t1	OJJ77140.1	OJJ77140.1 hypothetical protein ASPBRDRAFT_50101 [Aspergillus brasiliensis CBS 101740]	Aspergillus brasiliensis CBS 101740	98.2	167	3	0	1	167	352	518	4.15e-100	308	MSDQTPPRSPPQQPHPHPTPVQQHQQTKWLLLALSSGAFAALNGLFAKLTTDTATTTFAAHLIHIFTSTSNDATDDDLISSHPIFMLLIRGLCFGLNILSNIIMWALFTRALTAGSSTTKVSITNTAANFLVTAMLGMGVFGEMVGAWWWVGAALMGVGCVIVGRRD
g352.t1	OJJ77141.1	OJJ77141.1 hypothetical protein ASPBRDRAFT_50102 [Aspergillus brasiliensis CBS 101740]	Aspergillus brasiliensis CBS 101740	99.9	859	1	0	1	859	1	859	0	1651	MPVSPSSARPPTLSSERRNWRRLSGLSVVSPIHERPTPENGQPSAITEEISEIKRYEDFTTIDWVQDAVHEQARRRAKRRDGSGFWDQEGTFGWRRKVRESYDAGQAWLVITIVGAAIGLISAVLNIITEWLSDVKLGHCTTAFYLNEQFCCWGAEGGCPEWRPWTSYWIVNYIIYIFYAVLFAFVAASLVKSFAPYAAGSGISEIKCIIAGFVMKGFLGAWTLLIKSIALPLAIASGLSVGKEGPSVHFAVCTGNVISRFFSKYKQNASKTREVLTATAAAGVAVAFGSPIGGVLFSLEEVASYFPLKTLWRSYFCALVATGVLAVMNPFRTGQLVMFQVQYDRTWHFFELIFFVLIGVFGGLYGAFVIKWNLRVQAFRKKYLSQHAIMESVVLAGMT…
g353.t1	OJJ77142.1	OJJ77142.1 hypothetical protein ASPBRDRAFT_36341 [Aspergillus brasiliensis CBS 101740]	Aspergillus brasiliensis CBS 101740	100	186	0	0	1	186	1	186	2.48e-119	345	MPPKDKAAAEASSSQEITGQSALPISRIKKIIQLDDDIVQCSSNATFVIAMATEMFIQYLTEQGHNVVKSERKPRKLIQYKDLATAVSRIDNLEFLSDVIPKTTTYKQFKEKRAKEKETGPEKGQRTLNGNLPAAVEDKEEVEDQQGLQPVEDKSSRSSRPPTVTMMVDRTVDTSAGDQDVEMTDQ
g354.t1	XP_001401032.1	XP_001401032.1 cytochrome b-c1 complex subunit Rieske [Aspergillus niger CBS 513.88]	Aspergillus niger;Aspergillus awamori;Aspergillus niger ATCC 1015;Aspergillus niger CBS 513.88;Aspergillus brasiliensis CBS 101740;Aspergillus luchuensis IFO 4308;Aspergillus luchuensis;Aspergillus welwitschiae;Aspergillus phoenicis ATCC 13157;Aspergillus niger ATCC 13496;Aspergillus eucalypticola CBS 122712;Aspergillus niger CBS 101883	100	238	0	0	1	238	1	238	2.16e-166	469	MSLSAASSSILRACARQQLPSSRAAIASCQQRRGVADASKSTFDSPFGSSKEYSSTLKIPDFSKYQSKKPPRSNQVFSYFMAGSLGLASAVGAKATVQDFLVNMSASADVLAQAKVEIGLGAIPEGKNVIIKWRGKPVFIRHRTQDEIQEAQKTEWQSLRDPQADEDRVQKPEWLVMLGVCTHLGCVPIGESGDYGGWFCPCHGSHYDISGRIRKGPAPLNLEVPQYNFPSEDTLVIG
g355.t1	OJJ77144.1	OJJ77144.1 hypothetical protein ASPBRDRAFT_115112 [Aspergillus brasiliensis CBS 101740]	Aspergillus brasiliensis CBS 101740	98.6	493	6	1	1	493	1	492	3.62e-293	811	MQSMPLLLRQSFKSTLNLTRTSRPVRRPLLPAVGPNSLYPAPRNFSICLQCQFRTQSSLFSSDPLKDGKPAEQPKEDASPIIAVPEGNQNLEADAGSQQQTPPAAAEAGERTQSQQQQQQQQEEKNEANAKGWRDGGLPSYIEERRSQFTKRFSDVMDNLQSNIFVAGQRLNDLTGYSAIEMLKKEIHLQEERLRNARLQVRTAKDAYAAAINNRSTSQREVNELLQRKHAWSPTDLERFTHLYRNDHTNEVAEHEAQEALSQAEHEAEEAAAQLSKSILSRYHEEQVWSDKIRQMSTWGTWGLMGVNVLLFLIFQIAVEPWRRKRLVKGFEEKVIEAIEKEKALDRIQIVTAQSQMAQESSAAPTATPETAETAEPSASTTTDDSIADLAEPDAIVTI…
g356.t1	OJJ77145.1	OJJ77145.1 hypothetical protein ASPBRDRAFT_202184 [Aspergillus brasiliensis CBS 101740]	Aspergillus brasiliensis CBS 101740	100	155	0	0	1	155	1	155	3.75e-108	315	MCGSDIFLAILAVFFPPVAVWIKVGICTADSIINLALCCLGYVPGLLHAWYIILKYPEPDYDDPSYEPLPGDAENGRVTYYYVSHQPPQHPSQRGYGTLPPQHPQAANPPPQNRQSSPNHPHEQARAGSSSRDHPDSRPPPTYAEAVKGDHKVQD
g357.t1	OJJ77146.1	OJJ77146.1 hypothetical protein ASPBRDRAFT_114080 [Aspergillus brasiliensis CBS 101740]	Aspergillus brasiliensis CBS 101740	90.8	500	1	1	1	455	1	500	5.34e-290	813	MSGTCISLSGSTQCPAFNDSSVSTNSSLYTDFPFMQYVSNLTQFDNELSSYVMQGYVKEKYEDYLGCQGASMAISEEAIVTDTDLCSEKASDYMSQIRSDFTICALPADSLTVTCITGAENEPNNCGYRSNLLGLCSYCASGSSNSTDSCCTDSNAASRCSNVTVPSSTLPPIFTSTAASNSTAGSNDLSGGQIAGIVIGSVAGFALLAALAMLALIYWRRRRRAENDSSLNQPNPQRKGSPSTQQNRSLHEFAAIPGGRVARMSALREVSSSSPARSRYSALFGGGKYSDASDSDHGASPGAMSKKIPPTTGKRHGSLSSNSALAGAGTDSSPRSGTGGQYSSPDGLTSGQSEQLSAFQDYYSQDDIHPGDKVAVLWAYQPRAGDEFALDRGEMLKVI…
g358.t1	OJJ77149.1	OJJ77149.1 hypothetical protein ASPBRDRAFT_36349 [Aspergillus brasiliensis CBS 101740]	Aspergillus brasiliensis CBS 101740	100	197	0	0	1	197	1	197	5.01e-138	394	MFLRSVTRAAARSSAVPTTGLRSYRTVSGPMACLNARPQTEKKSIAPQQTRAASEHAISNPTLAGIEKRWEAMPPQEQAELWMQLRDRMKVDWHQMTLQEKKAAYWISFGPHGPRSLPPKGENLKIFLKVAQLTLVSFGIFYVIHLFAKPQPKTMTKEWQEASNEYAKQEKINPIYGISAEGYEGKGFVQSPPAEKQ
g359.t1	OJJ77150.1	OJJ77150.1 hypothetical protein ASPBRDRAFT_228390 [Aspergillus brasiliensis CBS 101740]	Aspergillus brasiliensis CBS 101740	100	518	0	0	1	518	1	518	0	995	MFKSGLARTFGRAAFARPTSVARRAFQPKTNGLPSLARMASTEASSVGKIHQVIGAVVDVKFEGDKLPAILNAIETENGGQKLVLEVSQHLGENVVRTIAMDGTEGLTRGAAARDTGAPITIPVGPGTLGRIVNVTGDPIDERGPVKADKFRPIHTEAPEFTEQSTEAEILVTGIKVVDLLAPYARGGKIGLFGGAGVGKTVFIQELINNIAKAHGGYSVFCGVGERTREGNDLYHEMQETGVIQLEGESKVALVFGQMNEPPGARARVALTGLTIAEYFRDEEGQDVLLFIDNIFRFTQAGSEVSALLGRIPSAVGYQPTLAVDMGGMQERITTTTKGSITSVQAVYVPADDLTDPAPATTFAHLDATTVLSRGISELGIYPAVDPLDSKSRMLDTRI…
g360.t1	OJJ77151.1	OJJ77151.1 hypothetical protein ASPBRDRAFT_165825 [Aspergillus brasiliensis CBS 101740]	Aspergillus brasiliensis CBS 101740	99.4	692	4	0	1	692	1	692	0	1425	MASTETQTALQSAPPDGTGVIQLDPWLEPFRDALKQRFEFVESWVKTINESEGGLDKFSRGYERYGLNVNANGDITYREWAPNAVEAELVGDFNNWDVTAHPMTKNSFGVWEITLPAKDGVPVIPHDSKIKITMVTPQGERIYRIPAWIKRVVQDLAVSPIYESVFWNPPATERYQFKHPRPKKPESLRIYEAHVGISSPETRVATYKEFTANMLPRIKYLGYNAIQLMAIMEHAYYASFGYQVNSFFAASSRYGTPEELKELVDTAHSLGLVVLLDVVHSHASKNVLDGLNMFDGSDHLYFHAGGKGQHDLWDSRLFNYGSHEVLRFLLSNLRFWMEEYKFDGFRFDGVTSMLYVHHGIGTGFSGGYHEYFGGSVDGEGVMYLTLANEMLHSLYPDCI…
g361.t1	OJJ77152.1	OJJ77152.1 hypothetical protein ASPBRDRAFT_50111 [Aspergillus brasiliensis CBS 101740]	Aspergillus brasiliensis CBS 101740	98.7	549	7	0	1	549	1	549	0	1032	MLLDKRSFLSFLGLAPIFAAAQLSGSVGPLTSASTKAATKTCNVLDYGAKADKSTDLGEPLASAFADCKSGGLVYVPSGDYALSSWARLSGGQSWALQIDGIIYRTGTDGGNMIYIEHSSDFELFSSTSEGAMQGLGYEFHADDNWSGPRLLRLYEVTDFSVHDFILVDSPSFHFSVDTCTNGEIYNMAIRGGNHGGLDGIDVWSTNIWVHDVEVTNKDECVTVKSPSKNILIENIYCNWSGGCGMGSFGSDTNVSDITYRNIYTWNSNNMMLIKSNGGSGFVENVLLENFIGHGNAYSLDIDSYWASMSSVDGDGVQLSNITVKNWKGTEAYGAQRGPVKVICADGAPCYDITIEDFAMWTEEGDSQWYSCESAYGSGFCLQDSDDHVSYSATTSTVN…
g362.t1	OJJ77153.1	OJJ77153.1 hypothetical protein ASPBRDRAFT_36356 [Aspergillus brasiliensis CBS 101740]	Aspergillus brasiliensis CBS 101740	99.3	299	2	0	1	299	1	299	5.01e-191	536	MKASFITLFAALATSAIAAPTGGVPGVSEVTKTVNIGSVSSNVVSTPSASASTGATGHIVQDVGNGVNQVLTVTGSDAKKLLIQLSPDVANLLSGLGLPGLGSSVGSIIKTAASVGDLIQDIGNDVDGLLTVVSKDGSALLIQLDPVVAGLISGLGLPGVGVPVGSIVGTLGENFKRSADGKIVQDLAPKVKDVLEVTGSDSKRLLVQLSPSVASLLSNLNLPSVGTPVGQIVNTASNVGDLLKDVSTPVEQLLTVVGQDGSYILIQLSPEVASLLSGLSLPTLGTSVGSVVATLGQNL
g363.t1	OJJ77154.1	OJJ77154.1 hypothetical protein ASPBRDRAFT_24860 [Aspergillus brasiliensis CBS 101740]	Aspergillus brasiliensis CBS 101740	99.5	779	4	0	1	779	1	779	0	1583	MGSATLCPSAASRCARLAMACWYTMLILSLLEPAARAANLTSHVDLFLGTQSGGNDFPGVARPFGVVKLGPDLYVSGTDSYSGYLPNGNFSGFSMMHEQGTGGAPKYGTVSQLPLVGNISNPLSNLTIGRSGADEASVGYYKAQTAEGTVVELSASAHAGIYQYTFPNGSDGNVLVDVSHVLPSYRGMGLSQGYKGGNITIFPDGHYEGHGVYDNGWNRSPDWSIFFCGQFDASPVSNKTYVGTDVHGSVEQSSGFASSSSGSTRVGGVFTFKDSVVTSRVGISWISTEKACKNVEDEIPEDKEFQSVVDDAQSEWETKVLSKVTTTNTNETTLTLLYTSLYFMHLIPTNQTGENPQWTSQEPYYEDIFTYWDLFRCSTALMQVLQPAAYEEQIRSLID…
g364.t1	OJJ77155.1	OJJ77155.1 hypothetical protein ASPBRDRAFT_113767 [Aspergillus brasiliensis CBS 101740]	Aspergillus brasiliensis CBS 101740	100	518	0	0	1	518	1	518	0	1011	MSLLKNYRVYLLTAVAYSGSLLFGYDTGVMGSVLSLTSFKEDFGIPTGSSGFASSKSSEISSNVVSLLTAGCFFGAIFAAPLNERIGRRYALMIFTVIFLIGAAVQVASKHHIGQIYGGRVIAGLGIGGMSSITPVFVSENCPPNIRGRVAGMFQEFLVIGSTFAYWLDYGVSLHIRSSTKQWRVPVAVQLIPGGLMLIGLFFLKESPRWLSGKGRHEEALQSLAYIRNESPDSEAIQKEMAEIRAAIDEEVAATEGLTYKEFIQPSNLKRFGFAFTLMLSQQFTGTNSIGYYAPEIFQTIGLSATNSSLFATGVYGTVKVVATAIFLFVGIDRWGRKLSLVGGSIWMASMMFIIGAVLATHPPDTSASGVSQASIAMVVMIYLYVIGYSASWGPTPWV…
g365.t1	OJJ77156.1	OJJ77156.1 hypothetical protein ASPBRDRAFT_70650 [Aspergillus brasiliensis CBS 101740]	Aspergillus brasiliensis CBS 101740	96.7	541	18	0	1	541	1	541	0	1033	MLLDWRYWFFATLFMLHHLMLADAASYDAKECRIPRLVEATAEQLQDGLQKGCFNSVDLVKAYMDRISKIDAQFGTILELNPDALGIAKQLDSERAQGKTRGPLHGLPVLLKDMIGTKDKMQTAAGSWALVGAKVPADATVAAKLRENGLVILGKTSMSEWANFRSVNSSNGWNARRGYTFGAYYPDQDPNGSSSGSAVATDLGLITFALGTETSGSILLPSERNNIVGIKPTVGLTSRYMVIPLSERQDTIGPLARTVKDAAMLLQAIAGPDDKDNYTLASPFAEKLPDYFAACKLSGLRGKRIGIPRNVIEYLGPAGAPIVSAFEAAVTVISAAGATVVDNANFTAYSDFYGSLKPATVVAADFSTNIKGYLGNLERNPKHLQSLEDIRSFTQHSAL…
g366.t1	OJJ77157.1	OJJ77157.1 hypothetical protein ASPBRDRAFT_50116 [Aspergillus brasiliensis CBS 101740]	Aspergillus brasiliensis CBS 101740	99	483	5	0	1	483	1	483	0	931	MNGLEQTCASLRTQIAATEAKLADLKRELEVAEQAAASHNSQNAAGAEGGSERRWPLLDEEYRRYGRQMIVPQLGIQGQLKLRSAKVLIVGAGGLGCPAALYLAGAGVGTLGLVDGDAVESSNLHRQVLHRTRNIGKLKVDSAIEYLQELNPHSKYIAHREHLAPEAAPEIFSNYDLILDCTDNPATRYLISDTAVLLGKPLVSASALRTEGQLMVLNNPPRPAGDKTGGPCYRCVFPKPPPANTVTSCADGGIVGPVVGTMGVLQALEAIKVITADETTTPPPPSLHIFSAYSTPLFRTIKLRSRRPNCAVCSAEASVTVDTVRSGSTDYIFFCGTADPGNLLSPEERITPLEYRTKHHDKKEKEPTIIDVREKVQYDICSLDNSINIPISTILASAT…
g367.t1	OJJ77159.1	OJJ77159.1 hypothetical protein ASPBRDRAFT_228737 [Aspergillus brasiliensis CBS 101740]	Aspergillus brasiliensis CBS 101740	98.5	1054	9	1	1	1054	1	1047	0	1987	MATPVDSDQSSSGVLSSEDDGQRNREWKLFSKLKGAWKSLELDMPTLLLMMKGALAPTICVAIYQADAVSSLFNTVGYLVAIISVLGFSIMPRAKFIQMMVLDVLAVCVASAVALLMMYSCVKAREHSESATAAADGSTAYNSSAAAVSGVWLFFEIYLVHTFRAKFQQFQFPVIIYSIVANVTFVYASRLGTMAAAIALVKKLLEACLTGLGVATGVSLFILPKSTRGIVFKQMAGYIGALRAALNAHTAYFETLEKDDMFGRAETYDSTVEKITDKGKVYSPEAQAIRTACQKVTDLHAKIHGDLTFAKREIAIGKLGPDDLQAIFRHLRQTMIPVVGLSFVVDIFQRLSDYNKWNQPIDTTGTEIPDQVRQRVRQEWNEIMRAVHDPFSSMIHTID…
g368.t1	GCB19208.1	GCB19208.1 3-oxoacyl-[acyl-carrier-protein] reductase FabG [Aspergillus awamori]	Aspergillus awamori	80.6	811	102	3	1	756	1	811	0	1261	MTSPKTILITGAAGGIGLSTSRHFNTIHPNSIIILTDLPAHQEVTESVIQSTFPHPERAVFLSADITDWEQMTRLFRTIAREYGGVDVVVANAGMMESTPVLDLDDVDEGTGELRESVEARRVVDVNLMGSLNTLRLAMYHMKEKRNGSIVLVASTSGYFGGTGVTAYVASKHGVVGLLRASQVMAQKYGIRVNAVAPFMTPTRMTAGLSQSWQDAGLEANTPERVAEVIEQIAMDTARRGSCMLCARKRPAVLFPMGVEYIEFSHAKDGLESQLCNCASSQNLVEGTGAEHLRHNAAANLTAEWKPGVKEWLVLTCASLLMTMDAFNATVVLPLITNLSATSGQPLGSTLWIEASYLLASAAGQPFSAMLAAIFGVGPIVLGAAVLATVGTGVCSGSM…
g369.t1	OJJ77162.1	OJJ77162.1 hypothetical protein ASPBRDRAFT_190498 [Aspergillus brasiliensis CBS 101740]	Aspergillus brasiliensis CBS 101740	98	101	0	1	1	99	1	101	2.18e-59	188	MDKIVSFSNWLKVIKSNTKPTTSVSVSAFYSKAKSDDEPPRKKQKLSHHSPLAVDGVVEQLTTQDNKQSIPVIAGEEIEMVEIHDYEFGAPLKRVPTPYPRGKKDLDDDENEQ
g370.t1	OJJ77163.1	OJJ77163.1 hypothetical protein ASPBRDRAFT_24866 [Aspergillus brasiliensis CBS 101740]	Aspergillus brasiliensis CBS 101740	99.7	379	1	0	1	379	1	379	4.51e-273	750	MKYSTIFSAAAAVFAGSAAAVGVSGSAEGFAKGVTGGGSATPVYPDTIDELVSYLGDDEARVIVLTKTFDFTDSEGTTTGTGCAPWGTASACQVAIDQNDWCENYEPDAPSVSVEYYNAGTLGITVTSNKSLIGEGSSGVIKGKGLRIVSGAENIIIQNIAVTDINAKYVWGGDAITLDDCDMVWIDHVTTARIGRQHYVLGTSADNRVSLTNNYIDGVSDYSATCDGYHYWAIYLDGDNDMVTMKGNYIYHTSGRSPKVQTNTLLHAVNNYWYDNSGHAFEIGEGGYVLAEGNVFQNVDTVLESYEGEAFTVPSATAGEVCSTYLGRDCVINGFGSSGTFSEDNTSFLSNFEGKNIASASAYTSVASSVVANAGQGNL
g371.t1	OJJ77164.1	OJJ77164.1 hypothetical protein ASPBRDRAFT_50121 [Aspergillus brasiliensis CBS 101740]	Aspergillus brasiliensis CBS 101740	99.7	299	1	0	1	299	1	299	2.23e-219	608	MAALRTTSRLFASSKPLFRPAAFARSYATVDALSQVSASGHASSKTIPESKTSNVQDPNPSEQPRVKTFHVYRWNPDQPTEKPKMQTYSLDLNKTGPMMLDALIRIKNEMDPTLTFRRSCREGICGSCAMNIDGVNTLACLCRIPTDTAKESRIYPLPHTYVVKDLVPDLTYFYKQYKSIKPYLQRDTPTADGLENRQSPEERKKLDGLYECILCACCSTSCPSYWWNSEEYLGPAILLQSYRWLADSRDEKTAERKAALDNSMSVYRCHTILNCSRTCPKGLNPARAIAEIKKMMTAH
g372.t1	OJJ77165.1	OJJ77165.1 hypothetical protein ASPBRDRAFT_112534 [Aspergillus brasiliensis CBS 101740]	Aspergillus brasiliensis CBS 101740	98.3	289	5	0	1	289	1	289	2.67e-206	574	MPLTNNRAIPILDHAYEHHYGVPAMCCYNLEGILATVRAAEKRRSPAMILLFPWALHYAGGILVHAAAEAARNASVPITVHLDHAQTPEIVRRAANITPGFDSIMIDMSHYEKAENLALTRELVAYCHERGIATEAEPGRIEGGEDGVSDTADLEGVLTTPEESEEFVDTGIDWLAPAFGNVHGSYGPRGIRLEYERLEGIRERVGNRVRLVLHGADPFDKAIFDRCIAAGVSKVNINKVLNGEWVDVMKEKAGAAKGVTVTGLIEEATERMEKAVERCIEVLGSGGRY
g373.t1	OJJ77166.1	OJJ77166.1 hypothetical protein ASPBRDRAFT_190502 [Aspergillus brasiliensis CBS 101740]	Aspergillus brasiliensis CBS 101740	99.3	436	3	0	1	436	1	436	5.42e-303	831	MSKPAIGFVGLGAMGFGMATHLVHEGYPVYGYDVFPASVQRFQAAGGTPASSLRGSAEGKPFYVCMVASAPQAQTVLFGDEGIVQYLPQNATLLLCSTVAASYAQSVAAELASRGRSDIHFVDAPVSGGAKRAADGTLSIMAGGSDSSLQIARELLQAMSAPSKLYLVPGGVGAGSNMKMVHQVLAAIHILGASEAMGFAAHLGLDAVKTAERIKSSEAWTWMHENRFPRMVEEDWNPGASALTIILKDAGIITTSARQNNYPVPLCATAEQIYLSALVQGYGPKDDSAMIRQYYSHPLKNVDTSSASEDPETAIQLVLDLMQCVNLVAAAEAIAFARSLGVDLAQFFELVSDAAGGSKVFVTRGLEMIEGKIGAQAPAGTETLDAVVSRLEKVVQKAR…
g374.t1	GAQ42750.1	GAQ42750.1 hypothetical protein AKAW_08879 [Aspergillus niger]	Aspergillus niger	83	188	28	3	1	185	1	187	1.47e-95	285	MAEKANPRPDHEEQQAETHELPSREAPTYTQPPTEQTPEIQPHQPQQTFYAGSQHPSGYNTPTPLYALQKTPAPVDCPACGQRKMTRVEAETGSSTQSRGHPQSLLFSSRLLDLRGRLFIMAAIDLLAVEARHQVIKRSNWAGENPGVVLVFCIVFIVAVGIIALFVYRKCMARKAAKQSYEVEA
g375.t1	OJJ77169.1	OJJ77169.1 hypothetical protein ASPBRDRAFT_190504 [Aspergillus brasiliensis CBS 101740]	Aspergillus brasiliensis CBS 101740	99.6	229	1	0	1	229	1	229	2.09e-164	463	MPSFFSVSSFVLAASLSTITYLTFLHRCLKNRIQYEKHCGTLSKSVSSTISTIPSEVYTPEYYALHDRASRRVPRQLLPRQKDAEILTILLRRNMTAFAHFPQCYMLWLISPAAKRPTFHTSHIDSLDFNKGDVICGIYRVLDRTADKVEFGMTYKGVDGRLVIRCWDEDKDVVFASETAMWTKVDETERATLPLENPVLRFVHELAAWWLLDSGVKYLEDLDAELEDD
g376.t1	OJJ77170.1	OJJ77170.1 hypothetical protein ASPBRDRAFT_24872 [Aspergillus brasiliensis CBS 101740]	Aspergillus brasiliensis CBS 101740	98.2	383	7	0	1	383	1	383	2.37e-286	784	MCQYTFHNNPECGHIANFTLDICVEMMNAMREGTKNPPGHKVTNVHDLLPKSPSYQCRPCEGKLSKEETNSSNSSDSDYVVLEGLNAGVPIVHSYMEMCLNEKNTPPDDCFDSFVHVNQPPRQETPTPAPKPNSASQTLKIRDLASSEPEIHPMINMMEELKGCENYLMNSTEHIRAHRSPSTPIRSPEQENYGDVPGLNQTWYESDSETEPEQVKSPRPLGAPFVSPHRAQRPREAPLRVSDLNSPPPSQQPGYLKATPRLTTTGNQGEPAPAYRSSGVTTPPNPRHLNSTLLPCTPCHLIVPPNYSSPPPAPRKPLRTSYMQYSPSDAFSVRREYNLPRHDVLNTILQSPPSQYPERYNRSYSRQYWGPTQGLNRDHHGGW
g377.t1	OJJ77171.1	OJJ77171.1 hypothetical protein ASPBRDRAFT_36377 [Aspergillus brasiliensis CBS 101740]	Aspergillus brasiliensis CBS 101740	87.3	566	65	2	1	559	1	566	2.32e-220	632	MSCHLSDIIKLHPDDEPYCAGWAPSKGRRCNNRTNARNRLQAGSLLDQGTRLLKAGRCIDHILEDLAPLVLCTSYHQNQAVGLTDKWISRVDKYVAGSRSTPRSSPSTSIPRWSPSPRMRNQSSMEDRLAELERKMQETLRKAEKAQQEKERAEREAERTRRDTENMVRRSAAMGYARGQEEARRRRSSPTVETETTTVEHNEAYGIQRNSVSSGSLSSRTQEAASGRSAETTLQLNTSTSTNLQVRRSTLIRTTWVQTGGDAPASPPTQTGRPAATPRSLRRVVETSEVVVTPPPAQRSNNNTTSITRRAIASPSAEPETASTTTTASSTEEPPSSTNTQESTPTETTSSSTIVPAPQTPISLASNDEEEPHSTPTDTSEPTAQTQTTSPSIIQYQHL…
g378.t1	OJJ77172.1	OJJ77172.1 hypothetical protein ASPBRDRAFT_50124 [Aspergillus brasiliensis CBS 101740]	Aspergillus brasiliensis CBS 101740	98.7	476	6	0	1	476	1	476	0	969	MEPDRPKRHLLSLPAEIRILIYKAVFDDNEVYEIQRKAIPVWCPVDKCWHQARRQFMADQTNRNSWDGFCSHLGCQTKQGQTVSRDIYVGHGPLIASGHYPCPQSLERNPALSLGFLRTCRQVYEEARHFPYRRATFFTQELGSFANFTYCLKAWQVSSIAHLRIRIPLVQSVETHLAEWNETLSLISLAFHGLSTIAIDVHFRYAEQTWRDTFWDGGLLELDRLNLKGMQLVIYEGERDPRQFFEYSAGTLASGKQSNQTTATRPNPISFHHARDTLRQRDQSRIDPNDTGRLFFRLSPNDFPLYVCNLIHLIPQRPRTEAEIRREDRHQRDYNYHYAYPEDDPEHVNPIFGFQFSEELKENKDEIARGLDKLQRSRKRLQQQRAKSPLPLPFKPSRR…
g379.t1	XP_035351989.1	XP_035351989.1 NmrA-like family protein [Aspergillus tubingensis]	Aspergillus niger;Aspergillus tubingensis;Aspergillus tubingensis CBS 134.48	92.8	304	22	0	1	304	1	304	6.55e-210	584	MATALLITGATGNQGGAVINALLAQDADVEILAVTRNPQSGTSQKLAGKSPKIKLVQGDLDHPAEIFENAKKLATRPISGVFSVQTPMAKGQNVNKEEIQGKALIDESIKQDVGHFVYSSVDRGGDASTDNPTNIPHFLSKHHIEHHLFEQTKDGAMTWTVLRPVFFFENLVPSFIGKVSATAWDAYLQGKPLQCIAVSDIGVFAAKALLEPQSYKNRCLSLAGDDLTFEQMQKKFKAKTGEAMPTTFRVVCYLLMWMVTDLRLMFNWFYDHGYGADIQGLKKMHPGLKNFEAWLEEDSEWVKR
g380.t1	OJJ77177.1	OJJ77177.1 hypothetical protein ASPBRDRAFT_50127 [Aspergillus brasiliensis CBS 101740]	Aspergillus brasiliensis CBS 101740	99.9	1372	1	0	1	1372	1	1372	0	2629	MSRPPSATENTRSGPLVTPAASAQHDCSDGPDRLHHKQQRHHDARSQLIHDDVVQQVPSPSRAESPTARQWATPVSTFALKRPTTVPVERLSRPDRSHSPQLSERDSIFATHYLPSDTEPAAVTPQIAPVQDVHNEPPTSLIPPLEDVSSTPTPISPHKVLPPRPTHVGPSHMEVDVRRKHPLGSPSLLPSAVPHSTPLLPVDSDATLGKRSELPRRGSHTSVWESLQHLRKFAPDNAATKSAIAEDPSPPRSLLSASLNDASLATYPTATRSPTKQSPVTNIEVISHAWSGQQDGPRVTKPERSSSRGRRGRVEQSIEANLANAEPTSHVRSRKSSHYLGLFKENTTSPDRKRKEERAGRLDELPESHDKQQLTAHSEPRYSVERRDSHSHIPSASDE…
g381.t1	OJJ77179.1	OJJ77179.1 hypothetical protein ASPBRDRAFT_190512 [Aspergillus brasiliensis CBS 101740]	Aspergillus brasiliensis CBS 101740	62.9	159	30	6	1	139	1	150	3.44e-43	150	MGFSYADLNNASALNFVGLAAGFRFGAMGSLGDGALFGRAWTPLILLFTFPAVAFTGLIYGFLLAWVSVLGAVQSLYLLYPPYNFNSAQSGLFNLSGLQSQSPGEIMGFTSPSVDYISARRPHVYAQPVFYSSVLNLNKYVLTSSTFFLLT
g382.t1	OJJ77180.1	OJJ77180.1 hypothetical protein ASPBRDRAFT_190513 [Aspergillus brasiliensis CBS 101740]	Aspergillus brasiliensis CBS 101740	96.1	593	23	0	6	598	1	593	0	1121	MLSCSMSRASFLALLVTTLALANDASALPDGDDAMHMGSGMSHGDHGNFTSLASAQPSATSQVSSDDSPMSYFASGLHTGTIVAHIMLMILGWCFVLPTGVMLSVARSRFALPAQLLFLVVNTLGMLLGIVYNNTTPDLYPSNAHHKIGWVASSVACAQVVMSLIFTYAGRGDADVAASERAAFMPVSRDETIYHQSQSFSSIALHNWSRDSGQETERDPFIPSSPSSSTCVPSSADCVDSQKPEGDLYDRKPVGSRSWFRNTFVDRFLASRVPRMVSRRVLGILNVVYMIIDRILLPFGFIAIATGGVTYGGIMRGIEIFNGLAHFIKGGIFFWYGILTLGRWMGCWSDLGWAWNVKPAAEIVGKAKARIPSAEFVESLVIFLYGVTNVFLEHLSGWG…
g383.t1	OJJ77181.1	OJJ77181.1 hypothetical protein ASPBRDRAFT_230001 [Aspergillus brasiliensis CBS 101740]	Aspergillus brasiliensis CBS 101740	97.5	562	13	1	1	562	1	561	0	1106	MVNYGRSKGCVTCKERRVKCDEATPECRACQRLRLHCGGYKTQYEFKDQTYKFRSQSAMVRRATQQSRAYNLRPLSEPDTAVPFYLHYYARMGRGDMSSARGFYEVLIPIYCSQRQDSALSLAVSAVASQVLSIWRRDNSPRPQQAYARAVKCLRRTLQDPHEWGNAATMLAILSLQLFESIVAIYGLRPSSQIHHNGAVSLLPFTDARDDNNSATAYIRQFILHTEICSAIRQGRPLQTIASSWIKSNAQFTVPNNPSAALDAIGVSVARIQARHLKLGLQSGRVTCSPEELSKCIAQTRQVDQELVTWAQCVPDYWHPLQLTSECNIDPSIPLYQSTCEVYPSCQIATIWNLWRIQRILITMIKLNLLDATLGVWLSDLQCDGMSWNLQELAELQHS…
g384.t1	OJJ77182.1	OJJ77182.1 hypothetical protein ASPBRDRAFT_36385 [Aspergillus brasiliensis CBS 101740]	Aspergillus brasiliensis CBS 101740	98.4	441	7	0	1	441	1	441	0	884	MRISICIYVLLTVFSSCSSAAGTNQTSNIPTLELGTDSAFNFQYLIALGDALTGGSDIAPVLGAAKNIKPGDMDSFSEQFYILANRTKEMAANPENAYDPVNVRDTWFSAAQYFRRADIYLHGNWSNPLINSLWAEQTAAFDKALASLPVPGQRVRIPAKKGNFTIEAIWYSASDSTSHQWPTLVIGNGFDAAQEDSYHYFVASALARGWNCITYEGPGQPTVRRDQNLGFIPDWENVVAPVVDYVLSQKSQIVDKDRLVLVGNSFGGYLAARAAAFEPRFSAVVLIDGVWDLYSGFSAQLPSNLLAMYEAGNYTEFDQEILSLRRADKLSTNTAWGLDQGLWSFLTHSPSNFFNQTKEYQLGNVVGKTNMPVFVGDAEFENIFPGQPQQVADALGAKA…
g385.t1	OJJ77184.1	OJJ77184.1 hypothetical protein ASPBRDRAFT_36386 [Aspergillus brasiliensis CBS 101740]	Aspergillus brasiliensis CBS 101740	98.9	471	5	0	1	471	1	471	0	937	MPSKGITVYSYIGVPGYEVGFAVPQQEVLHDVTHNFTSRQLEIDSSHIQGLGNFTGRFEWTIFRYGERVADAHNDIDSLSGKVEGGKMVATQDFHPIVTEDAIITYGFYAAGHGEVGLTDRHQCYVTICSRENREWMGSVAPPGSPAAQQPFSRFVLAAPHDNGMNGMTACEAIFQHLDSDMLAVVRRLVPLLEHVNHVPDHFLMQKLPHIVYGLSITQKKTVSIMLAMGARYFEFRPAKLLPMFQKVSSLRDTFYFQHACIPGLAFDEFLREQVAFLDDNQTEMVTIHIRWDNIVADCQRPTEDEILDLLNEACARAVRSPLTWGTRECFEQPIEKLRRTGTRLIVVIEADKYDSWTAEAYATLSADSIIGRFESMTTEGQADSDLTILQCQATSQSI…
g386.t1	OJJ77185.1	OJJ77185.1 hypothetical protein ASPBRDRAFT_190517 [Aspergillus brasiliensis CBS 101740]	Aspergillus brasiliensis CBS 101740	78.6	290	61	1	3	292	7	295	3.01e-164	468	MFEEYIDRLKSLAHALDQAGINHVLWGDAINGLLMHTKLPKRIDYIVCDGMTEKACQALLADGLEPCKDGDQCMVSHPCNGPVAAAHVHLNSIRLDNIDLPVAFWDKSSLLFAFPDLPSSPPSSDDPYYMPIRIPRTYYDRTSRRPAIKLAPTMMIKPVKTVEALLWLMCRDWNPNERLEMGWEDVWQMDLLSWERRAPGLAKEGLFFRNEMRSDFQPLWNYLCDGGGERSPKQHRAYYLALQAKFRAENALPRTPQPKRRTRKRVKQLMDYEDEERLKSFDPDYVNPILLR
g387.t1	OJJ77188.1	OJJ77188.1 hypothetical protein ASPBRDRAFT_113186 [Aspergillus brasiliensis CBS 101740]	Aspergillus brasiliensis CBS 101740	100	766	0	0	505	1270	1	766	0	1491	MNRQQLQLNTSNMGPNPRYSYMETPLEMHAPGNRVRDEITPLAATTNAQSAESQTIVEHFQPPLNEKSQQYQQDMAVQGYSCGPNLEQHPANYAPYADEIQQVQQLPKVPEYAYAQPPQSPGPLPVKKELEMSEPLPNKEPMAVVPDTNPLHSPQLPQFPPPVAHGAPTTPAGFDLMAYHRPGQITHPDLEIAGGSWRTSMCGCYDVGSCCLGLLCPCILFGKTQYRLSMKSRSEDPTNMLGYETCNGSCTAMALLCGCQCFLAAFQRRRTRKAYKIEGDIISDCARATCCTCCTLIQNEVEIKKREEERGRFASATGAALVSPYLPPMQMSGTLDEVVEMGKRCVQKEEPNWRRQSGPRVADLSIVLPNPLLPLAYSPGRIVIPVYHPPQLFAASLPL…
g388.t1	OJJ77189.1	OJJ77189.1 hypothetical protein ASPBRDRAFT_50133 [Aspergillus brasiliensis CBS 101740]	Aspergillus brasiliensis CBS 101740	100	285	0	0	1	285	1	285	3.04e-219	606	MGLTPVHFFSHGSTMMLGEESTSADYWRKCGDEALAQGIKGVVIMGAHWACHGDGIQVATNPNPGKSPVAYVHPSKYVDYKLNPDLATSHRCIDLLNQAGFKASGNDTFEWIHDVYLILIRMFPNACPPTTLVSSNARYDPHYHLKVGSTLRQLRRENYLIIGTGGAVHNLYRNRWAPMLRFRDNFAMETPPEDWALEFRQAVEDVMVKCSGGPKMRRAMTRLMKHPEYRDAHATDDHFMAALFVAGAVGEWEDEGSKVVLGAETWELTNMCNSQFTIGEWNKLG
g389.t1	OJJ77190.1	OJJ77190.1 hypothetical protein ASPBRDRAFT_165884 [Aspergillus brasiliensis CBS 101740]	Aspergillus brasiliensis CBS 101740	99.1	693	6	0	1	693	1	693	0	1359	MAAVNRNMFEASVTTDRPQGAPLMILPLNLIAVIVSYVDDPGDLARLCRACRVLNYMALPQLYKHITLTSYDKIRYRDDEPEGMGSASPFSMGLNAIITRPYATLVRSLTLRGNWRELELEEHARVGRVPDSSMMLNIAVRAAVDRMTELESFSWELNTKMLETVYLGLAQLPKLTALTVRFPSSRHPRPTIVIPPMPHLRYLKVTDIDPLCYPDDISTLVFKCRKLRELNMHWSPRMRNAQEPSVMVHDYFRKCIAAKQPLSIKKIGLQNLYALHTEDFGLAVNGSTVEEVTILQHGGADLSMNTFVDSTWPTTPSHPIRIKAIRQDAMSKKHALFLNQFTGLERLYFVNATLNPSDDINSPRPLTSSAALSPPSSDTSQPATNGTYANCSAVAASNS…
g390.t1	OJJ77191.1	OJJ77191.1 hypothetical protein ASPBRDRAFT_113310 [Aspergillus brasiliensis CBS 101740]	Aspergillus brasiliensis CBS 101740	99.7	394	1	0	1	394	1	394	2.07e-272	750	MVVFSKTAALFLGLSTAVSAAPAPTRKGFTINQIARPANKTRTVNLPALYARSLAKYGATVPQSVKEAASKGSAVTTPQNNDEEYLTPVTVGKSTLHLDFDTGSADLWVFSDELPSSEQTGHDLYTPSSSATKLSGYSWDISYGDGSSASGNVYRDTVTVGGVTTNKQAVEAASKISSEFVQDTANDGLLGLAFSSINTVQPQAQTTFFDTVKSQLDSPLFAVQLKHDAPGVYDFGYIDDSKYTGSITYTDVDSSEGYWGFSTDGYSVGSGSSSSSGFSAIADTGTTLILLDDEIVSAYYEQVSGAQESYEAGGYVFSCSADLPDFTVVIGDYNAVVPGKYINYAPISTGSSTCYGGIQSNSGLGLSILGDVFLKSQYVVFNSEGPKLGFAAQA
g391.t1	OJJ77193.1	OJJ77193.1 hypothetical protein ASPBRDRAFT_190523 [Aspergillus brasiliensis CBS 101740]	Aspergillus brasiliensis CBS 101740	99.6	1067	4	0	1	1067	1	1067	0	2076	MAAPASNGQHHHDAAASASQSLYSQDSRAPKSPSPQLQHQLQSQQSQHRRGYQACDPCRKRKVKCDLGSVDNPRPPPCVRCRRESKRCEFSATRRKRKPSEVEEPTEAILRRDKRMMVGEVISNSGSVSDGGSSYAPERTSSSFDNSTSISRPKWTEESPTTNNTQLPSSSTPSQRFPPNPPPSGNAPFSEPRSTRLPMYPAAERSHAASFSLEGGQPMMNRTAVELLSPAISNSHDALHLLSEAAGRTEDLNRQSLENRYAARQSVSSFNSPMSPLTQAGTPRSGGGSFSRPPRSGTVPVGTYYSAGASGSADARLPDGRGPADAAETTQDPGFVDAVKAWSRLRFVRAGWLSVEESMAYVAYYYEHLAPLSPIVIPDFSHPSTHRTLLTDEPVLAVT…
g392.t1	OJJ77194.1	OJJ77194.1 hypothetical protein ASPBRDRAFT_24890 [Aspergillus brasiliensis CBS 101740]	Aspergillus brasiliensis CBS 101740	98.4	621	10	0	1	621	1	621	0	1177	MALPATAWGFADNDDSGSRRERPGLFLPNRKLRHLQGISVRNLVVSPPSRPRGKTIDDDNIPNSLHTPLKALAEDEAKPLHQSRSFTDLKTTPASSAEGRPRREQPPPLRQWQRRNTLPWNGPNPRARQVKLEEITSSRMADTWFSVHCDGIDEPVYVSEVVEHATNPSFRSFDLNICGPAIARRDQVTVKVWARTVVMEEYLLLVELQLCLQSLQFLGKSLDNFHQPLPPNSILFHFADGVYTNLTDLPPVATSVPPRHPRSADGATLPTSSYDALMRLANLDECIQDALTTRDKLEAQISSILEENQRALATTSNSSQARDKLALTKHAVATERKQLRSATKRKEELIASLQARREAMERGRQTQARARSHLPDAQVKLGSSVKLLEQNTDEGRGQI…
g393.t1	OJJ77195.1	OJJ77195.1 hypothetical protein ASPBRDRAFT_114417 [Aspergillus brasiliensis CBS 101740]	Aspergillus brasiliensis CBS 101740	99.4	336	2	0	102	437	13	348	2.48e-234	654	MELVDEASKLGCRRNPSPGRDLRRKIDPPTFSHSLRSLFLSPELHPIPPPPTTPINSPSLSGSGPISVNRVNDEAIVGSIPPRSSPPSPSSKEENPVTRSTKILDPTKIGTWNIVRRPPIENHSIIQGKPREQNSNAFKTHQAKEGTRLRKALKALTHGKNIFAYHNIRTNQVVYSLTRYLENNMTLKQLVYHGKKTVPARLRKDMWVPYFSVHFNDSKIGLRAYHLLREFSIQRQLSPPKEMITITDAWIDQKRPRDPKGAEEFLEKYKDKIGRIMPKHHRKRAVMDQKATSVADIAAVLKIQEEEVQNGFADGKRGYLTPTARKRRRAARAKEEQVAAEQAARVAELEQVLSNESVEYKIQETAETTQALEGQEVKILWRDLHDARFAEAWPERVRH…
g394.t1	OJJ77196.1	OJJ77196.1 hypothetical protein ASPBRDRAFT_114295 [Aspergillus brasiliensis CBS 101740]	Aspergillus brasiliensis CBS 101740	87.3	300	30	3	1	299	1	293	1.86e-196	550	MTTYQFHDITKFVTDIDRRKCRREVPMQVLALGLCRTGTDSLRQALRALGYNDTYHGYAAALENPRDCEMWHAALSAKYEGKGRPFGREEFDQILGHCQAVSDFPTACFADELIQAYPEAKVILTVRDVDDWHRSVTESFVPLLTHPLLPLATLLETLFLSRTRWIRPTWQKIWKYYFDDDFAANGRKAFEAHNAHIKDIVPAENLLVYHVKDGWEPLCEFLGKKVPTLHTITTSSGNGDVVTMPFPRGNDPGTFRNRFRDAIWCYSLEVGERAGWVLGGLYFGVLGVRWVYGMSKLIS
g395.t1	OJJ77197.1	OJJ77197.1 hypothetical protein ASPBRDRAFT_114019 [Aspergillus brasiliensis CBS 101740]	Aspergillus brasiliensis CBS 101740	47.7	465	6	1	1	228	1	465	1.37e-115	348	MLSYYQGKAIFITGGSGFLGTALVHRISTSVEFKHIYLLQRGGNSGLSAKWNQHLPSDTAQWLLEHPRITVLDGDMMKPGLGLDNDQREMLKRDIHIIIHAASSINLAQRLQKMWPSVIQATEYALFGTSFDFKEDKTEQLLSKLSVEERRTLRLFNTRKVGALELASRSKQLYDCSTIFARKIAYPYRVFYQLLWIIWWLYVKLIVAWAAFDLQTVRRQLFAGRKAY
g396.t1	OJJ77198.1	OJJ77198.1 hypothetical protein ASPBRDRAFT_36394 [Aspergillus brasiliensis CBS 101740]	Aspergillus brasiliensis CBS 101740	99.8	578	1	0	1	578	1	578	0	1016	MFSGSSSPPKDKTDSITRSGAIDTPPLSIHTEEASVTQKKSSPPGGFFTRRASEDQNNSGGEKKRRSSTVTKAASFFTSAKNSLSLSSSPRENSFHNYTIQEQPSLNRLGSMDPALSVPQGSFNNSAGESHPTSRSSFKVGVTEDRNRKCRRTMEDTHAYLYNFLGTPAPLAQAENNGKSLPSPTAPSPTSEGPPATVVETDNGYFAIFDGHAGTFAAEWCGKKLHLILEEVMRKNPNAPVPELLDQTFTSVDQQLEKLPLKNSGCTAVIALLRWEDRVPSLHSATGSAALAPAAAAAAASKGDTDSDAGDTPTQAAVSGGAASILPKLQEKSLRQRVLYTANVGDARIILCRNGKALRLSYDHKGSDENEGKRIANAGGLILNNRVNGVLAVTRALGD…
g397.t1	OJJ77199.1	OJJ77199.1 hypothetical protein ASPBRDRAFT_50142 [Aspergillus brasiliensis CBS 101740]	Aspergillus brasiliensis CBS 101740	97	1294	32	2	1	1290	1	1291	0	2379	MAAEFIGYDVLVTLRAPPNATVQGEVANVIGQRLMLRNVKLSWIAHQLPTYSIEAPDIADLSLGPATPRITQRPPPPQGPQKTAPAPPPPSSSQNFVDPAILSFSKPLSAPSGQGAESGPAQLPAPSISRSTSQNFQFPQVAHRDQAAVLNEPFSNLEVDVGNSASESRSAVPSGPVPAGRENLVSSQPTPQSATKASRRTGQPRTPKAVNEHDGATNTDPRSKGWRQTAFVEPSYPQLNKSLNKARRKKKNSRSNYAEDPNGWATEDATDIQEMGEFDFQSNLSKFDKRKVFEEIRNDDTTADEDRLVSFNRKVPKPGTNGGKNLHWTENVLDSPEETESDTDQVPSDAKLSSGTYSGRERSRTSRAPSSRKGSAILGQPLVPPQINSLGRSQLSTSR…
g398.t1	XP_035352009.1	XP_035352009.1 mitochondrial DNA helicase (Pif1), putative [Aspergillus tubingensis]	Aspergillus niger;Aspergillus tubingensis	95.1	757	34	2	1	757	1	754	0	1388	MFKKAVKDHSVASATPLQSTLTRSNNGSASMRPPPPSAGVKRKIEMATVRESNLGSLHDGVYFDENDFDDDDDLDFEEPDPFIPPAPITRPSVPKPEPPKYPTLHDIPAQDEEIPIVDLTSPSKAAAEVRYPDLPPIPDDPVPPSSSIQIPWSSSPPSHFQQPNKKPRTLPWLKDEPEPEPEPPSLKPQTPIRPKHTAPWNKSASAIKDEQRELRRQNKTMKAQASGQMNNPRTKVASIFLSDEQRHVLDAVVQQGKSIFFTGSAGTGKSVLMREIIKKLRDKYKKEPDRVAVTASTGLAACNIEGVTLHSFAGIGLGKEPVPELVKKIKKNQKARNRWMRTKVLIIDEVSMVDGDLFDKLEEIARRIRNNGRPFGGIQLVVTGDFFQLPPVPDGSNRE…
g399.t1	OJJ77200.1	OJJ77200.1 hypothetical protein ASPBRDRAFT_36399 [Aspergillus brasiliensis CBS 101740]	Aspergillus brasiliensis CBS 101740	98.5	747	11	0	1	747	38	784	0	1281	MGATHKFDLTSDVTHLLIGEVNTPKYKFVARERTDITVLKPEWVEAVRQSWMQGGDTDIRALEEEYKFPTFSGLSICITGFEDMSLRNRIQDIVTAHGAEFRKDLTKNVTHLIARNTEGEKYKFATQWGIRIVTVKWFEDSLERGMVLEETLYHPLLPDEQQGAGAWNRSLPTPKPKAPNTENPSNPRPRKLRRIASAKLGDQNEGIWGDIVGTGFDSSEPRPSRESLRRTQSLTKRPSILQESRSFASETTFAEVQEPLQPPPPPPPAVERREGFLGDCFFFIHGFSSKQTNVLRDHLSFNGAELVGSLSEFSRPDIPKRGHGLYTIVPYRMPRAQVPSTDDLAFECEVVTDMWLERCLDAKTLVSPESHTANTPIPSFPIKGFAAMKICSTGFSRID…
g400.t1	OJJ77201.1	OJJ77201.1 hypothetical protein ASPBRDRAFT_654392 [Aspergillus brasiliensis CBS 101740]	Aspergillus brasiliensis CBS 101740	99.2	945	8	0	1	945	1	945	0	1708	MSQEYFPGQGASSAGEGSSSPSSSSPSHSHPPPPPGEEERLPSTSSTMFPRPPPAYMTVGNGSTSESATALMASLHEDSGYGGSIPSGSVMDGDAGGDWRADLMVDRPTPMHTPTHLGDWNPAAEHERQVVASHVHQLLYNSNRTKLARAISRTIETLKELQNMNRQWPAHYPSSQSAPGSPAPKPALQKRQSFFGDASAELEDFPRPGMVRRAATMTGGEDLAESSAAAERRVPSEPRLMSPQIAQEFSILKLDLKLGALSQAELVHSLEKASIASLLDGKISQSIKHLLSLRDRIEDTSSKVLITGDLNAGKSTFCNALLRRKVLPEDQQPCTSIFCEVLDARENSGVEEVHAVHKDVLYNRNDESTYDVYALQELENIVIDNSKYMQCKVYVKDVR…
g401.t1	XP_001401111.2	XP_001401111.2 DOA4-independent degradation protein 4 [Aspergillus niger CBS 513.88]	Aspergillus niger;Aspergillus niger ATCC 1015;Aspergillus niger CBS 513.88;Aspergillus phoenicis ATCC 13157;Aspergillus niger ATCC 13496;Aspergillus niger CBS 101883	97.8	231	1	1	1	231	1	227	4.03e-121	353	MNIVEWAFGKRMTPAERLRKHQRALDRTQRELDRERVKLENQEKKLVQDIKKSAKNGQIGACKIQAKDLVRTRRYIQKFYQMRTQLQAISLRIQTVRSNEQMMQSMKGATMLLGSMNRQMNLPALQRIAMEFERENDIMDQRQEMMDEAIDEATGLEGEEEEGEDIVKEVLDEIGVDLSQALGETPTDIQKTAVGETRVAQAVGAGGGGGGGGGANTSDDDLQARLDSLRR
g402.t1	OJJ77203.1	OJJ77203.1 hypothetical protein ASPBRDRAFT_230828 [Aspergillus brasiliensis CBS 101740]	Aspergillus brasiliensis CBS 101740	93.7	520	17	1	1	504	1	520	0	983	MATNTGNQRLWSQEFACLAGVLTHAHLVKAEEHQRRWAHMYAWKSSLATVIHDLLQPGSLLSAEHPILHEVLSRRYFASMQARGEAEVSKCTHLIDGLYGTVRTDSYRYQQVNVPDEYRANLCPTLLDEFVLRGILGMGTYGVVFLAHKRHDPRSAGSQKLYAIKAEAISTVNTDLRRATSPSVAPLYYPMPHHFRYIPTEAYILLLADGCKRFPTLDSVYSHGKYQATVMEAVETKAVREEPYDPYAPTSVWRKSMLNPKSGSSLVIDKKTDASEVDACMIATQLLEATAYLYDMRLCHTDISHVNYLLDDEHNTTLIDLGLVHFGLRDGDFQKSSTPYIANYEKFMTPELAMELLKPEHNNVGLGSDTTLIPFRHDVRYLTIWQLGCIIYEVLHGFA…
g403.t1	OJJ77204.1	OJJ77204.1 hypothetical protein ASPBRDRAFT_24902 [Aspergillus brasiliensis CBS 101740]	Aspergillus brasiliensis CBS 101740	97.1	655	13	2	1	655	1	649	0	1154	MAVINQNNNQVPPAPPTHHPPMRPNEGIRVAQAGPPRPMNPEYLVHQMGRLNVQPEKPPAVNNPKPKETTVVEDIDARAPFYYLGYTFFKADAVPGHKSTWNHVERTKMNLSQSDLMKLVHKRTKKIPIAEQYQSLSKVKRAHVDQLISELRKSDPHFEWTCVYVKEDEKPFKGKNSRRGDYETLSVNVVIMRKATDLVFPKIPVDDHVNVEALPNPQDRVPTHAHNDQSGQGPKGSSRSMQPSEPLVGPTIHQGPMPPAMNHSQQPLPTRFHQSPPHQPPPQLPQLPQGYPGPRPHMTQGPWPWVHGMPTGMHPHHVQPGMPVSTMPAPTMSGAAMSGQANVPHMVAQPNGLRGVHMAAGMFHHRQGFDPRAHFPGQQETHPSDKAPAPAHSPAPVPV…
g404.t1	OJJ77205.1	OJJ77205.1 hypothetical protein ASPBRDRAFT_165916 [Aspergillus brasiliensis CBS 101740]	Aspergillus brasiliensis CBS 101740	99.6	249	1	0	1	249	1	249	4.69e-171	481	MPRQFFVGGNFKMNGTADSITSIINNLNAAKLDESAEVVVSPPTLYLLPARQAASDKIGVAAQNVFDKPNGAFTGEISVEQLRDAKINWTIIGHSERRVILKESDEFIARKVKAAIDGGLSVIFCIGETLEEREANKTIDVVTKQLNAVAKELTKEQWTKVVVAYEPVWAIGTGKVATTAQAQEVHAAIRKWLVDAISAEAADNTRIIYGGSVSEKNCRDLAKEADVDGFLVGGASLKPAFVDIINARL
g405.t1	OJJ77206.1	OJJ77206.1 hypothetical protein ASPBRDRAFT_190537 [Aspergillus brasiliensis CBS 101740]	Aspergillus brasiliensis CBS 101740	91.9	518	19	2	1	518	1	495	9.30e-294	813	MLDFMDYIQLAFAEATNWNRDNSYSSLTATAQCMQTRLVLLSIYIQTHTDHFSTALLDFSTPERLRVHISSLSTPHFATSYTLGTVGLIDGSVSYLFSTVPLDHAPSRSALIPLRKISPGYRQVQAPIAPIAETILINDDLNNNDAAYKATIGKKATLFHATLHLPPPTTLNALFLRRLSPTMQLSLAVCSTRGPPLSKSAPQASLLAQLSHNTGKFNNEYLFSTDNALFGWRGLWNFGPDPRDPVASGSSPRLSLLSAGAEAYYSPVSSLIGMSTGLRFSTLPAATDVPSSLTPTSSTTSTSTTNTNTNTNTNTNTPISTFPYTLTLTLTPLTGSLSTTYSLRASPNLAFSSRFGFNVYSWESEMVAGCELWRKSKPRHRHPYGDNDDDGLEWARRKI…
g406.t1	OJJ77207.1	OJJ77207.1 hypothetical protein ASPBRDRAFT_190538 [Aspergillus brasiliensis CBS 101740]	Aspergillus brasiliensis CBS 101740	100	248	0	0	1	248	1	248	3.02e-174	492	MPRSKRARVVHESKTVKKSHKEQTRRLYANIRECIEKYDHLFVFGVDNMRNTYLKDVRTEFADSRLFFGKTKVMAVALGHTPENEAAPNLHKLSPHLTGAVGLLFTSRDPQSVTDYFESFRPLDFARAGTVSTRAFTIPNGQVYSRAGEIPASEDEPVSHTIEPELRKLGVPTRLIKGKVMLELTEGQEGYPVCKEGEVLSSRQTTLLKMFGVVMAEFHVALKAHWTRETGEVEILAKDEAGMEVDGQVGLLVVGCWCWVPAFFKENYLYDVTLKKDRPDTMNPLPHPAPFDDEIPWASLELG
g407.t1	OJJ77208.1	OJJ77208.1 hypothetical protein ASPBRDRAFT_24906 [Aspergillus brasiliensis CBS 101740]	Aspergillus brasiliensis CBS 101740	90.7	428	1	2	1	389	1	428	6.35e-214	603	MTDKLPPPLLALFQPRPPLRYVTPIERAPEDCKKSSIGGIAQFLPEVKKYEEEIPYTPTESWIQRKLRQKVEKKENLNKQLTEGLESYEPTNDQQARGDPFKTLFVARLSYDVKESDLEREFGRFGPIERIRIVKDTVTPKGSKKAHRGYAFIVYEREKDMKAAYKETDGIRIKDRRVLVDVERGRTVKGWKPRRFGGGLGGRGYTKALPSRPIGPGSFNAPSGPGGYGGGFRGGFGGGGRGGFKGGFRNDRGFGGPRGGIGYQGGRNGFGGQAPPNAPSGPGGGRSGGFGGPPGGGRPEREGRGATGSNREPIRPRDGFGDRDRRDRDRDRDGDRHRDRDRDSYRYRDRDRERDRDRGDRYGGRGDDYGRKRYHEDDSYDDPRAKRRY
g408.t1	XP_001401119.1	XP_001401119.1 mitochondrial 54S ribosomal protein MRPL51 [Aspergillus niger CBS 513.88]	Aspergillus niger;Aspergillus tubingensis;Aspergillus awamori;Aspergillus niger ATCC 1015;Aspergillus niger CBS 513.88;Aspergillus tubingensis CBS 134.48;Aspergillus luchuensis IFO 4308;Aspergillus luchuensis;Aspergillus luchuensis CBS 106.47;Aspergillus welwitschiae;Aspergillus phoenicis ATCC 13157;Aspergillus niger ATCC 13496;Aspergillus vadensis CBS 113365;Aspergillus piperis CBS 112811;Asperg…	100	137	0	0	1	137	1	137	1.32e-97	286	MPLQGIRTVTAARNGVGAFILQCKRLDFHYCDWAGSSRGMVAYLKHHLPAFAKANPQIEIRVSPRPHKHPVIKGHYINGREKAVCVRNLEPEQIGKKADLLKQASGEKLKRTKKPVTSINESVRGIWSPYHGGYKSV
g409.t1	OJJ77210.1	OJJ77210.1 hypothetical protein ASPBRDRAFT_190541 [Aspergillus brasiliensis CBS 101740]	Aspergillus brasiliensis CBS 101740	97.4	350	6	1	1	350	1	347	5.73e-231	641	MSDDSGVLFVGSRPRKRTHREISEVSSGRPSGEASSSSLSATPGPSLPPLRRYPGDGFDLRRPATSQPSEDVIDLTDEPDTPLQNSSLQDPRTTNEASRPRPPRFPRDILTEVVDLEEEVDDNDQQQQQQQQPPSSPEVEFIGATVRRPQLPPPPQPPPPPPRSNEGFYMPSLWQQMLQFRSPRPPVRFENHGRPDVSFRGFRRHPPMSDVESFWIGDGPAGAIDLTINLDVDGPLGLDYQLTGLTRQRTPANAYKPPSPPPEGFTRNVAEDDVVVCPNCDMELGTGDETKQQIWVVKQCGHVYCGDCASNRSLSKAKKNASKAKAFSKCQVFGCGKPVSSPKSMFQIYL
g410.t1	OJJ77211.1	OJJ77211.1 hypothetical protein ASPBRDRAFT_24909 [Aspergillus brasiliensis CBS 101740]	Aspergillus brasiliensis CBS 101740	99.6	475	2	0	1	475	1	475	3.20e-299	825	MLCAISGEAPQVPVVSPKSGSVFEKRLIEAYIAENGKDPVNGEELSTDDLIDVKSQRVVRPRPPTLTSIPSLLSVFQEEWDALALETYTLRQTLAQTRQELSSALYQHDAAVRVIARLTKERDEARDALSKVTVGARGAAASGGEAMQVDSTGLPEAVLARVESTQASLSKTRRKRPVPEGWATAEAISTYKPTESSKPLYPGSKAFAVNSSGELALIGGADGAVGIYSISQKQIVQNLQANGPVTDAAWAGEKAIVASSTGSVKVFENGNEVANFNSHAGAATALAVHATGDIVASVGADKSYVLYDLTTNSVITQIFSDASLLSVKIHPDGHLVAAGGVDGQIKIFDIKTGASAATFAMSGPVKSLFFSENGVFLAAVTENSTTVSIWDLRSAQESK…
g411.t1	OJJ77213.1	OJJ77213.1 hypothetical protein ASPBRDRAFT_36413 [Aspergillus brasiliensis CBS 101740]	Aspergillus brasiliensis CBS 101740	98.5	1063	16	0	137	1199	22	1084	0	1985	MSFKSKDLAYEAKEPAFLQRLKNQYGNTSGRLERPIARPRKPRDDNDDDGPTYVDEDSNEIISKEEYEALVRGEDNKDIENSNEDTKEPGTGEEGKSNTQAEASVSKQNVAEIGGPRKRKQAKVVGEDNSTEETEKICILAHVDHGKTSLTDSLIATNGIISPKLAGKIRYLDSRPDEQLRGITMESSAISLFFSMMRRPAPDAAPVAKEYLINLIDSPGHIDFSSEVSTASRLCDGAVVLVDAVEGVCSQTVTVLRQTWVEQLKPILVINKIDRLVTELKMSPGEAYSHMSKLLEQVNAVIGSFYQGERMEEDLQWRERMEERANASAARSKKQEQDDEPTAEYEEKDDEDLYFAPEKNNVIFCSAVDGWAFTIRQFAAIYERKLGIKRTVLEKVLWG…
g412.t1	OJJ77214.1	OJJ77214.1 hypothetical protein ASPBRDRAFT_36414 [Aspergillus brasiliensis CBS 101740]	Aspergillus brasiliensis CBS 101740	98.6	290	4	0	32	321	2	291	2.46e-188	530	MIITAIFVEYFVYLLSGNVVVPHRGWVPPKKKSFASISCQQRKLDFSEPLLLLPFFYFLLSSHSVRHSAGMATALPTLAIPGQRLASIASYAAGPGTHVQDATIYASIAGPVVVDQAQPSSKAKLILSVSRTGPKKAAAPAPSTKASAKPANTGKPKLRYNTLPAVDSVVLARVTRVQKRQATVSILVVLDETAGSQPLNPSQTASDNDNIEAILSSAANPENHSNSDELRFQALIRKEDVRAVEKDRVVMDEMFRVGDIVRGTVISLGDQSFYYLTTARNDLGVVMARSESGNMMFPVSWKEMRDPVTGVAELRKVARPF
g413.t1	XP_001401125.1	XP_001401125.1 vacuolar protein 8 [Aspergillus niger CBS 513.88]	Aspergillus niger;Aspergillus tubingensis;Aspergillus awamori;Aspergillus niger ATCC 1015;Aspergillus niger CBS 513.88;Aspergillus luchuensis IFO 4308;Aspergillus luchuensis;Aspergillus luchuensis CBS 106.47;Aspergillus welwitschiae;Aspergillus phoenicis ATCC 13157;Aspergillus niger ATCC 13496;Aspergillus vadensis CBS 113365;Aspergillus piperis CBS 112811;Aspergillus eucalypticola CBS 122712;Aspe…	99.8	576	0	1	1	576	1	575	6.92e-212	612	MSGITNACLSCFSTVDRWCHISACLGPIGGRSRDGIYETTLADNEREAVSDLLGYLENRTETDFFAGEPLRALSTLVYSDNVDLQRSASLTFAEITERDVREVDRDTLEPILFLLQSSDIEVQRAASAALGNLAVNADNKVLIVALGGLAPLIRQMMSPNVEVQCNAVGCITNLATHEDNKAKIARSGALGPLIRLAKSKDMRVQRNATGALLNMTHSDDNRQQLVNAGAIPVLVQLLSSPDVDVQYYCTTALSNIAVDSSNRKRLAQTESRLVQSLVHLMDSSTPKVQCQAALALRNLASDEKYQLEIVRAKGLPPLLRLLQSSYLPLILSAVACIRNISIHPLNESPIIDAGFLKPLVDLLGSTDNEEIQCHAISTLRNLAASSDRNKELVLQAGAV…
g415.t1	OJJ77216.1	OJJ77216.1 hypothetical protein ASPBRDRAFT_50159 [Aspergillus brasiliensis CBS 101740]	Aspergillus brasiliensis CBS 101740	96	618	1	2	1	618	1	594	0	1074	MSVSASVSASASSNLPSDSRSSGPLRRLSQLRAYTQLHFSSSSSSSSSSSSSHPSAAATTAAASSSSGPRISRRHTLSSRVSWFSPASTGTESSQLSPVGSRSSGPCPESEQPSTLARYSAVFFPSYRGLELDLRSSRQSDLSSSSPSNHSGGRQTTTQGTTTTMARPRGASQALDARPDLDGTSPSASSNLHAGALDSSDPVMSENPSTASPRPKQKATIRFFPHQDSHQSSRPSLPFIPVSRTLPSESCVIRVGRYSERDGLPVANPTDPSDAPVGFKSKVVSRKHCEFLYLNGQWHIKDVGSSSGTFLNHMRLSQPNMPSRLYTVKDGDIVQLGIDFRGGEEMIFRCVRIRIECNRSWQQQPNEFKYDYLVLKLLCVDYPANARFSKNTESLIRNL…
g416.t1	OJJ77217.1	OJJ77217.1 hypothetical protein ASPBRDRAFT_190547 [Aspergillus brasiliensis CBS 101740]	Aspergillus brasiliensis CBS 101740	96.7	276	9	0	1	276	1	276	1.78e-75	241	MSGLMHKVKDAMTGHHSQSSNTSSSNAGPHSSNVANKLDPRVDSDRDNRARHEAMGGAHGPHDSSMANKMDPRVDSDRDNRANPSSGIGGGAGYSSGGYSSGPHESGMANKMDPRVDSDRDNRARHQAMGGAQGPHSSSMANKMDPRVDSDRDNRAAGGYTGSSTTGAGYGGAATGAGYGGGAGYSGGAGDYTTSSGYGGSTNAGPHGSNVANKMDPRVDSDMDNRARHQGLASSSYNAPGQSTAGPHSSNVANKLDPRVDSDLDNRGTLGSQRGF
g418.t1	GAT19282.1	GAT19282.1 WD-repeat protein [Aspergillus luchuensis]	Aspergillus luchuensis	69.6	648	131	3	30	611	1	648	2.83e-307	879	MPVTPGKPSGGDRAMLDLLARSLKRREEDMVSDKSKLRLYHEAYTVALICPLEVELSAARYMLDDEHAGLPRDEFDPNTYVLGSLSGHNVVLASLPKGSPGTASAAAIAIHLIRTFPANELRLLVGIGGGIPSKINDIRLGDVASDHRIRPNRIAEFLSDMLRKYPALREYQRPLSETDILFPADYIHVHGEGSCASCDKAKAVQGFPRVSSDESRIFYGIIASANGMINDGQKRDLLAIEYGGAICCDIGAAGLMDQFPRAVIRGISHYCDSHQNDDWHAYAAGAAAASAKEALMYMEPLYTQQHDVPLPGWKTNILKRLHTCNYRDIKIRIPQRLDGTCQWFTNHHLFQDWREDHGLGLLWVSADPSCGKSVLAKYLVDEVLPISETIVVCYYFFKG…
g419.t1	OJJ77220.1	OJJ77220.1 hypothetical protein ASPBRDRAFT_190549 [Aspergillus brasiliensis CBS 101740]	Aspergillus brasiliensis CBS 101740	99	400	3	1	1	399	1	400	2.31e-290	796	MRLNFSQPPTPVLSRQNTTFNNAHHYRAGTHPHLLTSRSKPRRWPLVFRFIKGAIHAAILLPVFLHAAFTAFVVYLDIYVFDTVGLPSSIIPSLSIVVGLMLVFRNQTSYNRFWDGRNGMNTIYTCIRNLVRTIVTNGYSTAGPPTAAEKEDIERTIRILMSIPFAVKNHLRAEWGAAWALGNDVAENGVAAFNPDYASLLPAGLVGHEDEGLGLPFQLTFFVDGFIKRGVERGWFNAPGASQMQAQLNSLMDAYGKMETIKLTPIPVAHLIHQKQVLALFGCVLPFGMVDDMGWWTVPMVSLVIFTLYGIEGIGSQLEDPFGYDRNDIKMDAIVGDAKTEIEVVLAEWRRLMASLESGSATDNSDQHLGNGLIVEEVKEQKFMPPDMFLKHRARPSGR
g420.t1	OJJ77221.1	OJJ77221.1 hypothetical protein ASPBRDRAFT_24918 [Aspergillus brasiliensis CBS 101740]	Aspergillus brasiliensis CBS 101740	92.6	189	3	2	1	179	1	188	3.47e-88	266	MNLLSLLLTLTTFLLPLATAFTSTFDNCQNLNRLNQTVHRVHPLLEKFSSIHSSQSQSSSTTTTTLANGTTITVTNTASSAAIERVEGVRALLLSSQEKIYGRLANCSSDAVSSRNVLEKGVKRDDDDDDESCTLTDVLDQLVDTLECLLSFATGLLGSILDGIFDILKDVIEGVEKLL
g421.t1	OJJ77222.1	OJJ77222.1 hypothetical protein ASPBRDRAFT_190551 [Aspergillus brasiliensis CBS 101740]	Aspergillus brasiliensis CBS 101740	94.5	364	9	1	7	359	1	364	1.85e-238	661	MQETAIMEDGSEISRLALELSDLEVALFLCLAAHQHCRIDTTAANIHDVAKELALVIQNPVILSTKDFHAEILPPGLYRSSYARPSRSRMTTESAGMISSYHDIRDPKGRLKSVPLEHKQEVVNVVIAKNFSHVNDNIQREALELMHSKKLTTPAGLLEAPTNFLFLPLIVRGEAQPLNAHLNDYLFISHFHDTEDGYVYLEETNDWLSDGQMSASSVIRKPEAQTKKGHPHVESAVIEQLQQLSTTVSMGADIARYQQDIVVFLRLSRAVAGGISTRSNLHFKSFSKLLAVLHGIDFLTPSIVALAARKVFRHRIIVAKPEEDRSLQYGSDLHAVSQVLEYANPDSILDGVLTLEAPL
g422.t1	OJJ77223.1	OJJ77223.1 hypothetical protein ASPBRDRAFT_202244 [Aspergillus brasiliensis CBS 101740]	Aspergillus brasiliensis CBS 101740	99.8	829	2	0	1	829	1	829	0	1645	MAPSNPLANWERLGDSFYRKVPIYDAIFDDDVELENYIIAGAPYGGAIALHRDESKPYRFRDAQTAKSSIDIYSCSGKHINRINWEYGTIRGLGWSDKEELLVITEDGTVRRYFGLHGDFTSFSLGNGAEDYGVRACRFWISGFVALLSNNQLVAVSNYDEPRPRLLAPCPEGEVSSWSLIPPAYTLSRSVEVLLAVDKTVYLVDPTEAEDKVLQNGPFKHASVSPTGRFVALITAEGKVWVVSSDFQSKYSEYDPESRVTPRTVDWCGDDAVVIAWEDEVHLIGPNGVAARYYYDGTVHVVPEFDGVRLITNDTCEFLHKVVDVTEAIFRLGSTSPASVLLDSIDLLEKKSPKADENIQRIRPSLPEAVDTCVKAAGHEFDTYWQKRLLKAASFGKSV…
g423.t1	OJJ77224.1	OJJ77224.1 hypothetical protein ASPBRDRAFT_202245 [Aspergillus brasiliensis CBS 101740]	Aspergillus brasiliensis CBS 101740	99.4	170	1	0	1	170	1	170	2.42e-100	296	MAKSRPQSKHSRAARRAASPSLDVDKSLTTLPRAEETTVQRDSILSERANAGISKKQSKSKAKSRAQRLRQQKGVERAEAVMDQLEKKVTKSVGRAKAVKARAADWEDLNRKSKSMFEALNEEPDDNMDDAMMDDAAASKPAKRVSKPAPVTQAPVVEEHEGIDVDDDIT
g424.t1	OJJ77225.1	OJJ77225.1 hypothetical protein ASPBRDRAFT_231617 [Aspergillus brasiliensis CBS 101740]	Aspergillus brasiliensis CBS 101740	98.2	666	12	0	1	666	1	666	0	1253	MNARREGVNFLTPNPFSVQYSNYETVLQQLQGNPSFVASILVTAITLYFAISYLGPASLSVARIAWNILVHLTPSRLIVALDSKTPKSDTTDENPLSLTFEAKSEAMQRILGLDDTSFSSLFPRAPAFSSFGTSLLSSKNHIPPGLGNWDNSCYQNSIIQGLASLQSLESFLDQNVEQLGQKALLSTHQALKDIIERLNSADSNGQRLWTPADLKSMSSWQQQDAQEYFSKIVDQLDLEVQQATRRHTRNLGLKMAGPQEHVIGSGLSQELQENGAGESRSTGTQVFRNPLEGLLAQRVGCIQCGWTEGLSLIPFNCLTVPLGPKFEYDIRECLHHYMHLEPIEGVECAKCTLLRVQSQLLNLLKQIGEDEETPSATPESPKISDALRNSAQERLQAVE…
g425.t1	OJJ77226.1	OJJ77226.1 hypothetical protein ASPBRDRAFT_190555 [Aspergillus brasiliensis CBS 101740]	Aspergillus brasiliensis CBS 101740	100	190	0	0	1	190	81	270	3.52e-121	353	MPPKKRSAPSSAPAPKRARQSKLAKENDISASEENEIKEVFQLFSETVEEFADQKQGVIPRGDVRKALVALGLDPTDSEELHSIIAAVDPTDTGYVLYEPFLAVAAAKLRSRSDDAMAAEVDAAYRLFTKGSGGLITLNHLRRIARELKEEELGDELLKDMILEANGGAGVHAGVTLEQFHDVMTRAGVF
g426.t1	OJJ77227.1	OJJ77227.1 hypothetical protein ASPBRDRAFT_36422 [Aspergillus brasiliensis CBS 101740]	Aspergillus brasiliensis CBS 101740	98.3	582	10	0	1	582	1	582	0	1109	MDVELYVYDLSKGLARMYSLALTGTQIDAIYHTSLVLNGVEYYFGQGIQTAIPGSTHHGQPMEKLHLGKTELPMDVIEEYIQSLAEIYTPESYDLFLHNCNNFTQDLAMFALGKGIPEHIQNLPQTFLSTPFGQMMKPQIEMALRGVTQGTGAGTVGTQMPTTSAPTAPAQPTPVTQGSVRIASNLAQLEHHLAAASDSCAVIFFTSATCPPCKVVYPTYDELAEEAGAKATLIKVDISTAMDVSMKYSVRATPTFMTFLKGQKLDEWSGANPAQLRGNVRLLLEMAHPPHRHQQLRLPSLQRTITNYVTYKKVPPLDKLVQKLHPHHEDPRLLSILTYLKHRTSSSTPAADTPLPQDLPSFATYLQSTAGFLPLENQFALVDLTRLLFLDPRVSSYFA…
g427.t1	OJJ77230.1	OJJ77230.1 hypothetical protein ASPBRDRAFT_24924 [Aspergillus brasiliensis CBS 101740]	Aspergillus brasiliensis CBS 101740	100	209	0	0	1	209	1	209	1.01e-111	328	MYPFLPWSQNQSSVRSSLSEATTSTQNVSFSFSFGSSCSPTSMPPPPPPSPTDSLLDINPRKCSFSSGYEMNNSCAFPSWPNRPSLLSADSDGSTASAYLSDEDLLPIGAGSPCESAIDEESAAQDPTMGDVDLTTEQQIQMIRAAAEEEAQRARFLAQVQAHARAQQAMRVAQMAAVERENAKRKKRKAIPERKRRTASASKATVCRA
g428.t1	OJJ77232.1	OJJ77232.1 hypothetical protein ASPBRDRAFT_36427 [Aspergillus brasiliensis CBS 101740]	Aspergillus brasiliensis CBS 101740	99.2	249	2	0	1	249	1	249	1.51e-167	473	MAAEQKLVLITGANQGIGFETAKNLLLSDNYHVILGSRDPVKGEEAVKSLQAVPGIKGSVSSVQIDVTDDQSVDNAAAQIKAEYGRLDILVNNAAMNSMKHPPTREAMRQILDVNVVGALSTTEAFLDLLRNSSEKRLIFVSSSTGSIMRAADPSSPFHIAGATEYRASKAALNMMMVLYMCRLENEGFKVLGADPGLCATNLTGDPESLRRRNAAEPSDGGERVATVVKGERDADVGKVIGVYGISPF
g429.t1	OJJ77233.1	OJJ77233.1 hypothetical protein ASPBRDRAFT_114710 [Aspergillus brasiliensis CBS 101740]	Aspergillus brasiliensis CBS 101740	99.6	801	3	0	1	801	1	801	0	1561	MESRQQPPWQQPPAHPDARLPPLKVWNSLTRSKTPFVPLDPKGRKVTWYACGPTVYDDAHLGHARNYVSTDILRRILRDYFKFDVEFVMNITDVDDKIILRGRQQHLFNKYIAEHPTVTPEVLETARSAYSAYIKKNLPLVDPDTKPENFVAEVEKVYGVVLQGGALEADKKPGDAEAKIKMHIKTVTTTASAIADAAQKPDAASSKAFYNAAQDAFCFYLDLTEGSTIPGDAHEIFTKLTKKYEDHFMRDMRNLNVLDPDAVTRVTEYGQQIADFVEKIVANKFGYVTSDGSVYFDIKAFEEAGNHYARLEPWNRNNQPLLRDGEGALSRATEKKSSDDFALWKASRPGEPSWSSKWGPGRPGWHIECSAMASSCLGSQIDIHSGGIDLAFPHHDNEL…
g430.t1	GAT19269.1	GAT19269.1 small oligopeptide transporter, OPT family [Aspergillus luchuensis]	Aspergillus luchuensis	89.1	1042	68	4	1	1042	25	1020	0	1856	MSVFRFHLSQEPNRQNIQDKIIATHAEIEKYSTEYLKPWQLLRLKIDAFEVTINRKDIIKFRPCFFSPLSTDTIRTCLSKKQPNKINISDGNISEYAERGNPCSDTVTTMQCPLILDLFRDKYATSVRKGFCLDSLTTLRECGATSKGKWKQQPGLELVEKLSTERWQILRILEDLEHEVPHAVCDIRQNIEVNKKKGLTVAEVKAIMRIMAVRIGLDCYRRHSIMPILAISYLNRKQGRILQAHYTGHRVVIQYTKVLELDERESDTVEKMVSKELNEKSFKSPQVSADVEVQQGGFDEIQPDFDLSEQEKEQNDYDYESEHSPFPEVRAVVPETDDPGLPVNTFRMWVLGFIFTIVGSGINQFFSLRYPSVHIVSLVAELLAYPCGVFLAKVLPLWT…
g431.t1	OJJ77237.1	OJJ77237.1 hypothetical protein ASPBRDRAFT_202254 [Aspergillus brasiliensis CBS 101740]	Aspergillus brasiliensis CBS 101740	99.6	251	1	0	1	251	1	251	1.29e-161	459	MSAKLDKSLDEILVSRRQGARRRARRSAPKAANAPVPVGGVKKTTKTAKAPGKAVQNGHPVSSESKIMVSGLPSDVNEANIKEYFTKSAGPVKRVMLTYNQNGTSRGIASIVFSKPDTAAKAAKDLNGLLVDGRPMKIEVVVDASHAPEVPAPKPLGERVAQTKPQPKPATATKAAAGAKGRKGRAARRPNGRANRPKPKTVEELDAEMVDYFATTNENAGPAQGNAQANGAAPQQPAANGGEDLGMAEIS
g432.t1	XP_025477294.1	XP_025477294.1 hypothetical protein BO87DRAFT_408756 [Aspergillus neoniger CBS 115656]	Aspergillus tubingensis CBS 134.48;Aspergillus neoniger CBS 115656;Aspergillus costaricaensis CBS 115574	95.2	228	1	1	1	218	1	228	1.80e-130	377	METLKAMRKCNQLIRANTRQLDRDIAQLKTLESKTRQYIMNSSKRAQRNPSQAKQANMEAKTFARELVRIRKQSTRLHTSRAQLQSVQMQVNEAFSVRKIQGSLKKSTGIMKDVNTLVRMPELNATMRQLSTELVRAGIIEEMVDDAIPNNELLEEEEDEAEEEVDKVLEEILHGKLSQVEGVQPEKPLEEAPEPEDEFADQEATLEQMRGRLEALKS
g433.t1	XP_025569371.1	XP_025569371.1 HSP20-like chaperone [Aspergillus ibericus CBS 121593]	Aspergillus ibericus CBS 121593	87.4	199	24	1	1	199	1	198	4.70e-105	310	MPELPQVHPEVTWAQRSSDSDAERNYLYVNIKAADVARSDAKIDIKPTNVTFTGDSKKGVKYHVSLDLYAEIDPENSKVNHSDREVELVLRKKELKEEYWPRLLNTTQKIHFLKTDFDKWVDEDEQDEVNEDDYANNFGGFEGLGGEGGGLSNIDFSKLGAGLGGDAGAAGEEEEEEEMPELEEGEAEGAKSSKIQEVS
g434.t1	XP_035352048.1	XP_035352048.1 translation machinery-associated protein 46 [Aspergillus tubingensis]	Aspergillus tubingensis	93.5	352	23	0	1	352	1	352	1.79e-199	562	MPPKKQQNEPKKKKATVEDKTFGMKNKKGGSAKKQIAQLQAQAASNKNAEAKKKEAEKARREAEKKASEQAKKEALELFKPVQVQKVPFGVDPKTVLCVFYKQGNCEKGKKCKFSHDASVERKAAKKDLYTDSRDVKAAEEEAKKKDTIDDWDEEKLRKVILSKHGNPRTTTDKVCKYFIEAVENQKYGWFWTCPNGGDKCMYKHSLPPGFVLKTKEQKAAEKALMDKSPLNTLTLEDWLESERHKLSGNLTPVTPETFAKWKKERLDKKAAEEQARKAKETTGRTLFESGNWRADDESSDEEEDDGAWNLEALRRETEKIRERKEEERLAALHGTQVPVSNGETIAQEGAD
g435.t1	OJJ77241.1	OJJ77241.1 hypothetical protein ASPBRDRAFT_50176 [Aspergillus brasiliensis CBS 101740]	Aspergillus brasiliensis CBS 101740	99.3	419	3	0	1	419	1	419	0	872	MTRILPFSAILLTGLLSHSEPVAAVGRSCDPDTRPYSAWMTDSVIARRDAILGTFAAGDDIYPNISRLALFESTVTRLKEYYDADSCGQVDWHSYALEGAESLLPAVQNVTFDVNAPLTVFASGDVMYHQYDRAPNETYKQALDTLHDAFNARTRDTEGAYWYFNPYPNVGVLEGLYPLSSFISMWKTYFDPTNTTLTDSLILSLDLFKDHCHDDSSGLLFHGYDSSRTASWADPTTGASPYVWNRALGDWFMTLVDLLERSDKHSAILNETQRDDVYTKYWNVANTIINDADEETGCWWQVMLHGGEEGNYIESSGSAQFVYGLLKGARLGYLQGETPTGVGYTDAADKCYNYLVSEFVKEEADGTLGYNGTVADCGLYNPTFEYYTTRPIEYNNVFG…
g436.t1	XP_035352050.1	XP_035352050.1 alpha/beta-hydrolase [Aspergillus tubingensis]	Aspergillus tubingensis;Aspergillus tubingensis CBS 134.48	92	462	23	3	58	512	1	455	8.24e-311	855	MVQSRQGSFNYGHPKQNSHPNHSQRSGVQAWIGQPPASTALSTLDGGSDVTRFEAEFMCTPVGKTREHLTLDGLGLKGVLQCCLPHELYIFTLSTHKTGLRERVNTMAPWILGEKFNTVYPHKGSIKALWETKWRFACEKSVYPFHDGAIEDFRPIFQKLIDENINDAYTDAYTQAFFPVAEALENKASAALNNNNTEMASDLLRRAAVVYRISRFPYVDPTREDIKKEAFNRQKKVYLKAASFWKPAIQEVIIPHKHKSATDGAYVPLFVRVPEHATAENPVPVVVLMTGLDGYRPDNSQRTHEIINRGWATVICEIPGTADSPADPSDPESADRLWTSVLDYMATRPEFDMSRVAAWGLSAGGFYAIRAAHTHRERFVGTLAHGPGCHYFLDPEWLS…
g437.t1	OJJ77243.1	OJJ77243.1 hypothetical protein ASPBRDRAFT_654468 [Aspergillus brasiliensis CBS 101740]	Aspergillus brasiliensis CBS 101740	99.6	482	2	0	1	482	1	482	0	1028	MIRTLITLGLYGFVRQALSKNVYLDWNITWVTAAPDGYARPVIGINGHWPCPQIDVNVGDNLIVDVYNGLGNESTGIHWHGLHQNYNGYMDGVPGVTQCELHPQQRMRYIVPMNQTGTYWYHSHEPGQYPDGLRGPIIVHDNVPAPYHYDEEMTLTLSDWYHVQIPILLDEFIVPSDHAPYGGQEPLPDAILFNDMHNTKISVKPDTTYLIHVVCMGNFPGHALVIDDHDMTIVGMDGIAIEPHFLPPQLLRMAVGQRVDLLLTTKNDTSKNYAIWDGLDIDEMFVQEGRSPPAGYNPNGTAWLMYNEDAPLPPPPVIHVNNASLEFLDDVTLTPRDHLPLIDPIQHQFIFDVYPTTVDGKPAYSINNMTYNAPDSPTLYTAIYSDPEACMDPDLYGDV…
g438.t1	OJJ77244.1	OJJ77244.1 hypothetical protein ASPBRDRAFT_111970 [Aspergillus brasiliensis CBS 101740]	Aspergillus brasiliensis CBS 101740	91.2	339	10	1	12	330	173	511	1.27e-222	626	MTEKETIVVIGAGIIGLSTALYIQQHLPPSQRVLLAARDFPHSTSLNYASPWAGAHYRPVPGSNAQQTREETQARRTYAHFKTLAAREPGAGVQSITGIEHLENPSAEYLDEKNVQDAYGHLDEFEYLQPGQMPGYVKWGFVLRGGEVKEYTFVDLREGFYLAERVGAVVNCSGLGFKDEKSYIIRGQTCLVRNPCSATITRQNSDGSWSFCIPRPLGGGTIIGGTKQPHNWDPNPSLETRTQLLASAAKWFPFEEGSNGEFDVIRDIVGRRPAREGGMRIEVEKVIQGQEVIVHAYGAGGRGFELSWGVAEDVYDLMRQNGLIKAKALL
g439.t1	XP_025514121.1	XP_025514121.1 DUF652 domain protein [Aspergillus piperis CBS 112811]	Aspergillus niger;Aspergillus tubingensis;Aspergillus luchuensis IFO 4308;Aspergillus luchuensis;Aspergillus luchuensis CBS 106.47;Aspergillus piperis CBS 112811	99.5	189	1	0	1	189	1	189	2.31e-130	374	MGVQKKTRKFAQMKRAIKARDERLKKPEAKKETPKEDQLTRQVTQAPSNMFFAANTALGPPYHVLVDTNFVSHAIRAKQDLLTSMMDLLYAKCVPTFSDCTIAELEKLGDKYRLALRVAKDPRWARVKCSHKGTYADDCIVDRVTKHRIYIVATNDQDLCRRLRKIPGVPIMKVARGKFTIEKLPDALD
g440.t1	OJJ77245.1	OJJ77245.1 hypothetical protein ASPBRDRAFT_50180 [Aspergillus brasiliensis CBS 101740]	Aspergillus brasiliensis CBS 101740	99.3	1559	11	0	1	1559	21	1579	0	2906	MKPTAPPVSTQSQTPPARLEPCAATASLLLYAQGSVIVCLHHDTLAIERRFENHQDDIGFIYVDNVSERGAGRLVVSYDVSQTAIVWDLFTGNVLARFASFEQLKVAAWMRNGNVAFGNEKGDVIIFEPSTSEHMSCRTIFDPITALAPATDCRTYAIGYQNGSIMLATLHPTFSILHTMSTSRGPSAIISLAWHASSSKQKSDMLASLAANGDLRVWSVAKPPQKEAPRVIRVLKRSDGSPATEPKWMAWSKNGRIVQFLEGETWAWDVRTKHVTYEPVPTIDNPRGFANYGPTATLFTLGPQYTVQQYDIESPAMVANVQHAPAGALPAPMDQPRLRTLQEPPNMRESGAMYGSRRTPFDTNGIEAVRQQRADVASPVNRSHANSVTNSVSSKASSG…
g441.t1	OJJ77246.1	OJJ77246.1 hypothetical protein ASPBRDRAFT_190573 [Aspergillus brasiliensis CBS 101740]	Aspergillus brasiliensis CBS 101740	98.5	404	3	1	1	404	1	401	1.34e-270	746	MSFTSDPPPTGDISPIPKDPNDPFSRFHPLKVNPELFKRPDPITLYMGFGGQSVWSTVATMNVIRTLEQHQRIANRPLTQSEADATIEHCTARLYHSRIGQPVGVLAGAIMTYKGAQNTEAWKKHFSSEAGVRRVDLLIEGIQSWARANPDTWKKEAGRAGLKTAVFAFVGLMLGDGIAGASDISQMMNDSRLKGLWAEARKRRDEMRGHVKTGKMPPVPPPPTTTTTTPTREEVPKSEEQNQQPQSDGYGMVSGGMQSGSDEEAARFGTSTTSWGSETTKKVATPAYETPSPSRDKSDDFWDDASPVASEYRGQGQSVPGESAWERIRRQNNVAAQREPRATVYKPASSSTASSTPASANDKPNERELAQAEFDRMLEAERKMSTDSLNTPQQNRAGW…
g442.t1	OJJ77247.1	OJJ77247.1 hypothetical protein ASPBRDRAFT_202264 [Aspergillus brasiliensis CBS 101740]	Aspergillus brasiliensis CBS 101740	99.6	245	1	0	1	245	1	245	6.96e-171	481	MATKPFAIIAGVGPGTGASIARRFAKSYPVVVLARNPANYQPVVDEINSSGGQATGISADLSDTTGIRAAFEQIRSQFQGSSLAAAVFNSGGGFVRKPFLELTETEFSSGFESQGKGAFNFAQSVLPLFPAESQGGLEYPPTLIFTGATASLKGSAQFASFAAGKFALRALAQSLAREFGPKGIHVSHVIIDGVIDIPRTKGWVFEKEDAKLDPEAIADSYWHLHTQPRTTFGFELDLRPYVERW
g443.t1	OJJ77248.1	OJJ77248.1 hypothetical protein ASPBRDRAFT_24943 [Aspergillus brasiliensis CBS 101740]	Aspergillus brasiliensis CBS 101740	96.9	356	11	0	1	356	1	356	1.35e-251	694	MEPDKAEETTRLHEESNGPSVKDIIRVTSYHRHDYDLAVIRTDPKIHDPIRDVLTQTTNIIILDSSLGSLDVFPLEIVYEICLYLDIQSLFRFHRVNRRARQLASASRYYKAVVTHAVEAVYITLRTGIASWYTISDLYAVLCIKNCESCDAFGGFIFLPLFMRCCFTCIADGALPYVLPASNVRPYLKRRAGPISRLVPTVKSLPGFYSLEETQRKRRFELILENSISTIFPSAEVEKSPGKVSRDTELQPYMVTTALPYLDNESDIIEKGVSCSGCQIALEKDLWSSRVKSNVCDKRDRVYSHEGFMEHFKSCQEARKLWDLSEGGTIEPDVPQFVKKGGSAKKRDVVMSFRGK
g444.t1	GAQ42681.1	GAQ42681.1 HIT finger domain protein [Aspergillus niger]	Aspergillus niger	71.8	638	152	9	1	627	1	621	8.07e-279	785	MSSPHPSPTILSMDVSSRDDSDYRILLQTQVRYLTIRPGTFDRTTLSMPLSSLPNLPDEPTWNTAYISRDPISGELTVDLQNRDLFGITDIWHPSQINCLELKRTKQLTATTFEATYRSTEPRSAATSESSTTVIAKVARFEWEIPRLSREISIYKKLQDTSLAPRFLGHVHEHGRVIGFILEKIEGRAARIEDLPGCQDVLGRLHDMGILHGDVNRYNFVVRDDGSTVHLIDFENSWQAKGATALMRAEMDSLGEQLVEETGRAAYLRRSELATESAFDRDFNFITGIERSIERAGRDAENRGIDVTAAGGMRDLEAVGLDHVPEGRKDGAATAAAGGKRKRGDGSSSGGGMTRAEMEFMRRAEERGVRVVRAPKGMSRNKGNGSRWLARNQCLIWTV…
g445.t1	GAQ42680.1	GAQ42680.1 similar to An14g05470 [Aspergillus niger]	Aspergillus niger	93.9	544	25	2	1	537	1	543	3.31e-297	826	MTTTLERSLSRTSSMSIPVSSPRLSLIHENTPPALADPSLSHIHDRLTLLDSRLLELRSSVLTKDGYVDRRNREDEHIRREFEAHRSISSRIDLNVVALKTDVDQLKSGISQLKSSIGQSGNETVFLRSDVDRLSKNVEQIQSDVEHLQTDVCGCRVEISKLHATISQLRTDLITLQHETSRHLTSVFNRFSLIEARMKHSERVRFNSLAHTTHAPITPVPVVEEDGTLQWPEYFPRTVWRFWCLKKRSRINRLAQLADFYQLGGYEYWGRMHQEQILFASDSDSSDSSDYPSNLSRAEAVRLYPEAAHQALAATLGLVYYKIRNEVGEGPNAAITRPPKRQQEEAISAASSKEKPVKIARRPTVSPTTLKRLITGPSLESKSLTSEESDKLGWNAHSD…
g446.t1	OJJ77252.1	OJJ77252.1 hypothetical protein ASPBRDRAFT_50186 [Aspergillus brasiliensis CBS 101740]	Aspergillus brasiliensis CBS 101740	98.5	524	8	0	1	524	1	524	0	1066	MSIDTDVLIIGAGPSGLGMAIQLIRNFGTRRFEIIEKTSNVGGTWSLNTYPGCGCDVPSHFYSYSFAPNPFWSRKFALQPEIHQYFESVAEQYDLRPHVRFHSAVKLAEYDSETATWRVVIEDQRTARQFHKRCRILVSAVGALSVPKGCDIPGAEKYTGRLFHSAQWDHSFDYKDKEVVCVGNGCSATQFVPIMSAGPNKVKRITQFSRQAHWLAERPNPEYSRGFRFLMRWVPGAQRLYRLLLFVQLEKDFTGFRLESGRSLRNEWTAAATEYILKNSPVNYRNFLVPSSVMGCKRKVMDTDYLACLHRENVELVYNDPIDRITESGVATQSGRVIDADAIILANGFETQKPLFPMEIRGQKGQSIADHWAEFAEGSSEAYFGTCLSGFPNLFLLMG…
g447.t1	OJJ77255.1	OJJ77255.1 hypothetical protein ASPBRDRAFT_36450 [Aspergillus brasiliensis CBS 101740]	Aspergillus brasiliensis CBS 101740	96.5	311	11	0	1	311	1	311	7.20e-222	615	MHVLVVNDDGPPSRDGSPFVHFLVNELKAQGHFVTVVLPNQQRSWIGKAHFVGEIVRPTFYYPDRLSQSNDPSSNEEDQHEHPWVLVNSTPAGCVQIGLHHSHALHKQNQGEDIPNPVDLVISGPNLGANTTTLFSLSSGTIGGALEAALCGKRSIALSFEPPSKLPSYDPDMITEASRHSVRLIDHLYHNWGEGVELYSINVPLRPATTAAEERKVLYSRIRPNRWLSESPFREVSSSGDATTALDDNDKTQSPQLLRWEPDLTDIHGSMDRTSDMDDDWMVRGGKTSVTPLKANFMHAVQAEGEIDLYA
g448.t1	OJJ77256.1	OJJ77256.1 hypothetical protein ASPBRDRAFT_190581 [Aspergillus brasiliensis CBS 101740]	Aspergillus brasiliensis CBS 101740	96.9	326	10	0	29	354	1	326	2.52e-230	639	MFNNKKPIRFELRSCIFIPVLSEAQATNMPSISGRLFLSIPQDISVKAIEVKIVGSLKIPRPEINAGSCQGGTTVERRQILASSRDNSFRLPRGRYEFPFELPIVREMMDTITGVGHTYHSYEVRGVIHRHFYSDIESTTPLRIHRTPNVFYANLLDQVMPSYEEHPNEELNLRYRISIPTHIPFGASFPLRFEYSSLSNPPQKGQLPSDIHPRSINIHITETHALKVTPTASDAINYNNYLPSTFRKEHVILHQSYAVQRPARALLPESLDFDYSATIPVHLPRDFQACTQDVQSELIKVHHNLHFKVEFEPEPEGETVSLQQNKVASPTYFLPCLSAYLYATRCAVILYTKN
g449.t1	OJJ77259.1	OJJ77259.1 hypothetical protein ASPBRDRAFT_113575 [Aspergillus brasiliensis CBS 101740]	Aspergillus brasiliensis CBS 101740	91.9	420	9	2	1	416	1	399	2.01e-286	786	MKLLLTTLILPSLLSTHLLATALSIPNTNPQETHPHTNCDCYITSSFSSNSNNNSDLAPPAYFTHYRFWDFRNTPLPQTAPETTQTNPSNPHDTSTLEIYPLAKTLFSHDWRVQTWDREATDISPVPMKNTDGNVFLLKHPASTPRDPRSSFLVLRTTRFQDHASTAEVEGLFGYIYHCSLRLRMRMMSRDDIVRAAAASALPNSQPESGSQSKIPQGSCAGIFTYRSSICESDIEILTSEDSHTIHYANQPDYDPISDTLIPGASSIVNLTKPWTSWTTHRLDWVADMSAWYADGQLQSKSNYSVPNRPSIVAMNLWSNGGNWSGDMKVGDSVYMGIEWIELVYNVTKTDQDLPIKDHPGHRDRYHRVGGFASASSSAGGNMLDEEDVDLQMGKAKEK…
g450.t1	OJJ77260.1	OJJ77260.1 hypothetical protein ASPBRDRAFT_50188 [Aspergillus brasiliensis CBS 101740]	Aspergillus brasiliensis CBS 101740	95.1	1096	44	1	1	1096	140	1225	0	2008	MSGVFSTLRSNVVDHPMPDVSIFPSNSAPQEEAAADGPSDPMDCSPDLPASNLTPQESSPKYQLRAVNLPGKPMAVRLNGNDTDKPSFPLRTPLIRPDHHFSPNSRITSALGVNGHQKSGSNTQSYFASNYFGTSNLRSAGLGRALWSLNDRHLSGPSYTERSRGTNYLIGGKSAIDKSAFHMTSLSANKSSGVTTPSRKRSMEDGGYDQAEPTTSPSVKFRRVRAGSFARSAATAAIEATTDEDDWYPGSPMDIDSPEQNNEPNMVTALAAVEAHLDLLEISPKSRQLGTTKVKPATALAISTIPSTQNSRMMPGAWPEPALSHNSAHAAHDMEDTTMASDNVMLFSLSDVADAGSETIPVVHDAEPQPSSPWYAYWSTWQNYLQTVVSIPAGITQNV…
g451.t1	OJJ77261.1	OJJ77261.1 hypothetical protein ASPBRDRAFT_36455 [Aspergillus brasiliensis CBS 101740]	Aspergillus brasiliensis CBS 101740	99.4	529	3	0	1	529	1	529	0	1035	MVNGKSGQPDAGLRSLDHYRNRLPYWRYWPRQKLLPLIRYETPYLAWVQERVRTPALDSYFAFTANLGTHTFFMVFLPILFWCGYTSLGRGMVHLLASGVFFSGFIKDLLCLPRPLSPPLQRITMSGSAALEYGFPSTHSTNAVSVAAYALALLNSSESTLSPRVNIVLQAITYLYVCSIVLGRLYCGMHGFFDVVIGCLLGFLLAFLQYTLGPAIDEYVLSATGRGATLVILLILGLVRVHPEPADDCPCFDDSVAFAGVMLGAQVAYWHIARSSLMWDEPVPATVPFEFRRVGLVKTALRLVIGVLMLFTWRAVTKPLLLRALPPVFRGLEKLGLILPRRFFRNASQYTKVPSQLRDHEVLPGFSEIPSIITTIRHPRRRAISIGPQSEADAYETLA…
g452.t1	OJJ77262.1	OJJ77262.1 hypothetical protein ASPBRDRAFT_232553 [Aspergillus brasiliensis CBS 101740]	Aspergillus brasiliensis CBS 101740	100	187	0	0	30	216	97	283	7.41e-126	367	MSATTASLLEQPWEEEEAGWLAGLIVEKLKYVPTVFENYITQTTHRASGKTVELALWDTAGQEEYDRLRPLSYPETDLLFVCFAIDCPASLENVMDKWYPEVLHFCPTTPLILVGLKSDLRSKRTCIELLKTQGLTPVTPEQGEAVARRMNASYIECSSKEMRGVDGVFSLAVDTVVSAEEQDWNDRQTSTTSGSKPRVGGGGGGKKVKKRSCKIL
g453.t1	OJJ77263.1	OJJ77263.1 hypothetical protein ASPBRDRAFT_190586 [Aspergillus brasiliensis CBS 101740]	Aspergillus brasiliensis CBS 101740	98.2	110	2	0	1	110	1	110	1.03e-61	194	MSTTPIPKNRSSSPTVFEQQRAELVREIAVGMEQVLQNINRLNRNLESIISVGNEFGSVEALWSQFENFMGRPGEEHEAGEGGRQKAGAGAGAGGHHQDEEQSQLHEEDR
g454.t1	OJJ77264.1	OJJ77264.1 hypothetical protein ASPBRDRAFT_60884 [Aspergillus brasiliensis CBS 101740]	Aspergillus brasiliensis CBS 101740	98.6	350	5	0	1	350	1	350	9.44e-249	686	MKAIGVENYGPVDRLEAREVPKPTELQPRDLLVRVKGVAVNPVDTKVRNGTYDDYPDYYDRVPRPFQITGYDGSGIVEAVGLQCSLFKVGDEVYYSGSPIRQGSNAEYQLVDERSVGRKPKKLDFVESAAMPLTYITAYEALVERLEIKKGEKAALLIINGAGGVGAMATQIARVVLNLPVVITTASRPETIQFTKDMGATHVVNHREDVASQIEKLNLDIPLKYIFITHSTDQYMDTCARVCAPFGKVCSIVQGQAKMYGTEFMSKSLTFVWCLLGTKPYHKVDVESHHRILEELTNLIDAGRIKCHLTKRLKLTLDGVKKGHELLQSGGSIGKVGLGVDEPGSGEIFA
g455.t1	OJJ77266.1	OJJ77266.1 hypothetical protein ASPBRDRAFT_114527 [Aspergillus brasiliensis CBS 101740]	Aspergillus brasiliensis CBS 101740	100	85	0	0	1	85	1	85	3.83e-50	162	MRDMSSKFIEILDPNDTRPRMSDCDVRLEDVLADHEALVTRPRSSTQSSSKPSLDNRLDRESPTSPTQRWKRLSTILVPARRGSA
g456.t1	OJJ77267.1	OJJ77267.1 hypothetical protein ASPBRDRAFT_112103 [Aspergillus brasiliensis CBS 101740]	Aspergillus brasiliensis CBS 101740	98.5	259	3	1	1	259	1	258	1.51e-174	491	MPTKRARKNPSVAQKPPSPPLSEKNAVTTQEIPEEEEGTKRESTPRDESYTPELFDEDEEMPEETENTIDPDTGKAAKRTAEYAVGGRGYNALKSYKGQMYSGMAVGGSHTWTYDQGTWKETKEEPDLWRIDYQTNKRRARKAPTGSGAPVGTEYHWLIVGHQHVKKIDANTYETHLTGSKYKLAYKSASSNSWSVPTVKKQREREVELLDDAKQRVQGMPPVLASEKVKVEKREKGQQSLDSMFGKAAGVKRKADQSG
g457.t1	OJJ77268.1	OJJ77268.1 hypothetical protein ASPBRDRAFT_232633 [Aspergillus brasiliensis CBS 101740]	Aspergillus brasiliensis CBS 101740	92.2	370	27	2	1	369	1	369	5.34e-240	666	MSKRISTFFQPLPSKKLKPNATTTAESSSSSRTVPPTYTHHPSYPIPIRDPPSTITAPLLSNPAPQPPKSITNHPHLDLLYFQPFLPTPLARELFEFLRNELPFYRVRYTIRRGGKETNINTPRYTTVFGVDDTSTFTENSNPTTSSSNPNTTVQDTTTENLPDAPHQLLSPANAPILVDSKTRTPLTENNKSRYRCRPRPIPLCLDVLRQAVEKATDDGTRYNFVLVNYYATGDDSISYHSDDERFLGQNPTIASLSLGTGRDFLLKHKPVTTTDTDGAVANAAAKPLKFPLKSGDMLLMRGETQSNWLHSVPKRKGLQGNAGAMGRINITFRKAVVPGGTENYYRYNVGDGEVYRWKDEEGRMVATDCL
g458.t1	OJJ77269.1	OJJ77269.1 hypothetical protein ASPBRDRAFT_50193 [Aspergillus brasiliensis CBS 101740]	Aspergillus brasiliensis CBS 101740	98.9	375	4	0	1	375	1	375	1.91e-272	748	MRLPMTQISRSVYNAAAPPVVAVLYQAIEPPIINGAQKPRKPGGYQDSGSDIAYTLRSRGVQVVTPISSPNPREQEGWCFPDTESGILSAVRQGATHLWANTILFSSHPLQASQSLASIPISVVGQPPSLVEAFDDKAYLNDQLRLHGSFTLPRSWLIRKSDSIPPILDSISRYPVVGKPVRGRGSHGVKVCHDRAELEEHINALLLESPIVMVEEYLTGEEATITVMPPSTESPEYWSLPPITRFNHVDGIAPYNGAVAVTANSRAVTDTEMQDESYRIAMRQCEQVAKLIGATAPIRIDIRRFSEGSQFAIFDINMKPNMTGPGRPGREDQASLTALAAAAIGWDYGALLHKILNSAQPLDRFRAYSNPFASH
g459.t1	OJJ77270.1	OJJ77270.1 hypothetical protein ASPBRDRAFT_24959 [Aspergillus brasiliensis CBS 101740]	Aspergillus brasiliensis CBS 101740	98.9	549	6	0	1	549	1	549	0	1101	MIFEPASRAPVPCTDVISYIFSDPPYNHDEPIYVDVHNPSRSISYNQARTIVRQLISGLRAWGVQKGDCVAIHSFNDIYYTMLVLAIVGAGGIFTGSNPAYTTFELNHHFRSSDTSFVITEPEHLDAITTAATAASIPAHRIRVFDVLGQSVPDGAVSWTELLNHGEQDWVRFEDEEISRTTTAARLFSSGTTGLPKAAEITHMNFVAQHEFVFEFNPRPWRVSRVIAIPLFHAAAAPSSHFGSLKAGHINYVMRRFDLPLFLQTVEKYQVTEMAIVPPIAIAIIMHPMSYERGYLRSIRASNLGAAPMDKDAQKRFQRLLGPRANCTQVWGMTETCCIATMFRWDEEDETGSVGRLVPNMEAKLVDDNGTDISDYGVRGELCVRGPAVTPGYFNNPVA…
g460.t1	OJJ77274.1	OJJ77274.1 hypothetical protein ASPBRDRAFT_115071 [Aspergillus brasiliensis CBS 101740]	Aspergillus brasiliensis CBS 101740	99.5	546	3	0	12	557	73	618	0	1091	MHRPVVDEIIGDLRDRHRRRCIKNIGQERQSKRKSCDACAQKKLRCSMTRPSCSRCLQSRRPCVYPQSSVPVQAPSLDDSQDNLVSSVGSIHAVPVCAGIIPGGTTWALPTYPFDTPSTGDELNDVPGASWSPETPTNAELAIQTVNDSTMFPIQDVSLMNSPTWQDDLHEQPETYGLEEFFPGSLDSCSQTMYMPPTMGSSPVTMVPPTPATLPGDSYATGGGLNMRSVSAGYFDSFWPDNLVSNDEDNETWRLGTYTDSRTGSGFGQSFLPKTHHHTPGDIGDLYQELFSLLREYPGLALQRQFYSPFLHHELQGYAMQSMGQPLSTTLSSISSYATYLETCDTFDLSMHNGERLAAAEGCVVALHAVCVHQILSIFGDNFATASFSKLPSFAGDHG…
g462.t1	OJJ77275.1	OJJ77275.1 hypothetical protein ASPBRDRAFT_50196 [Aspergillus brasiliensis CBS 101740]	Aspergillus brasiliensis CBS 101740	99.2	365	3	0	1	365	1	365	1.26e-256	707	MTVSHPKDVLNTINFVTQCLCIPIISIFVLLRFSIRIYYKQFVGVEDWSCLIAWVLFMGYCGIAIAVGHYGGGYHIDDVSAAHQILFRKFCYIATVLYCPMALFVKIALLSILIRIFSPYRSKIYFIYGLLGCLCIYYIVAEIVKIRMCDPVPGYWTLDPKARCLDQRAALIADSVISVVTDFIILILPLPLTWSLQMSRSKKLRVIGMLSAGGLATAFSLYRLVLVLRDGSSNDQTIVFMIVILSGNAEGGVAMICACLPTINILINKLRKKEYSSQRYYEPESSVNLSKIKGSNKRFSLGNSRRADGTESASDQSHLITFAGTVDMAGGLDTGGIHKTVDVSQTIEMAVDGDNHENHHHGSFH
g463.t1	OJJ77276.1	OJJ77276.1 hypothetical protein ASPBRDRAFT_24963 [Aspergillus brasiliensis CBS 101740]	Aspergillus brasiliensis CBS 101740	99.5	421	2	0	1	421	1	421	0	873	MTIVQAQGADSKLFQPLAIANGKLTLNHRVVHAPLTRNRGEPLNSNSTPENPNRIWYPGDLVVEYYRQRATPGGLIISEGIPPSLESNGMPGVPGLFTEEQAAGWKRVVDTVHAQGGYIYCQLWHAGRATVPQMTGYPPVSASASVWDDPEERYTHPAVGASEPVRYADHPPIELTVAHIKQTIQDYCKAAKTAMDIGFDGVELHSGNGYLPEQFLSSNINRRTDEYGGTPEKRCRFVLELMSELAQTVGQENLAIRLTPFGLYNQARGEQRVETWTYLCKSLKQTHPNLSYVSFVEPRYEQIHSYEEKDAFLRSWGLPNVDLSSFREIFGSTPFFSAGGWDQTNSWGILEAGKYDALLYGRYFTSNPDLVERLRKGIPFAPYDRTRFYGPFEDNAFHY…
g464.t1	XP_025566837.1	XP_025566837.1 short chain dehydrogenase/ reductase [Aspergillus vadensis CBS 113365]	Aspergillus vadensis CBS 113365	95	262	13	0	1	262	1	262	1.55e-171	484	MACKVSGTAFITGGAAGIGKTTAFTLAQNGIEAVSLLDVNETLLQRTKNELATSHPNVAVELTVGDVSKEACVDEAVRRTVERFGRIDISVHCAGIVGHPTATHELPAQEWQRVIDINQTGVLLCQKAVISQMLTQESRGLRLGRGTIVNMASMFGVVAPGGWSGLSAYAASKHAVVAFSKLDAKAYIQQEIRINAICPGYTDTDMIRTYWDAGFLEPDSQRVVIGRRAQPEEIADAILFLASPMSSYMVGSALVVDGGYTA
g465.t1	OJJ77278.1	OJJ77278.1 hypothetical protein ASPBRDRAFT_190598 [Aspergillus brasiliensis CBS 101740]	Aspergillus brasiliensis CBS 101740	98	49	1	0	80	128	77	125	6.58e-26	104	MSIGKIIGKIIIIPILVIIFICFCIYLLIKHRRERKRERREDKLRAQYYRQQFQQQQYMYPHTQTQPQQQQQQQPATPAPPYYNHTYTAEQQAVAMNGGEYGYSETMLKKPEPVVYAVQQQHPGSEVV
g466.t1	OJJ77279.1	OJJ77279.1 hypothetical protein ASPBRDRAFT_36483 [Aspergillus brasiliensis CBS 101740]	Aspergillus brasiliensis CBS 101740	98.1	471	9	0	1	471	1	471	0	968	MSAMSTATSHQPSMKQPRSQSPEKSSNAHEDENPTFEFGGAPGVTLLMLGFPLLMYYMFIGATLYDGHLPLPDKNQSVTDFLFHLVDLASTHAYPHRKAWIIYWTFLVLEGVGYLYLPGVYGKGKCLPHLNGKQLDYYCSAAASWYVTIAAALVLHFSGLFRLSTLVDEFGPLMSVAICSGFLVSIIAYASALLRGAQHRMTGSHVYDFFMGAELNPRLFQWLDMKMFFEVRIPWYILFLLTLGTALKQWEEYGFVSGEVSFLLLAHFLYANACAKGEELIITSWDMYYEKWGFMLIFWNLAGVPMSYCHCTLYLASHVPSTYKWNPAALTVLFVMYIFAYWVWDTCNSQKNLFRAQERGKPVNRKTFPQLPWKSVKNPVCIKTKTGDSILCSGWYGMA…
g467.t1	OJJ77280.1	OJJ77280.1 hypothetical protein ASPBRDRAFT_190600 [Aspergillus brasiliensis CBS 101740]	Aspergillus brasiliensis CBS 101740	100	433	0	0	1	433	220	652	2.82e-311	860	MPPGSLTLFYGILYYVIRDYLHAGDSDLAHFDLQSSLELCERHFVGGLSRPEIMSDPTLEKIQALLLGVLKAQEEFDVQRCWTSLSLAFNMCQSIGLHRRSTLERDEFAIAEAKRHAFWALYTIDKNISLNIGVTSHFQDHDIDAELYTPSNDPKHRPWDLMGLVIVEFASVQGRVYDQLYSTSACRAGDEQRSASIERLSSDLMTVRDKLLAIDVSQGLYSDSLHGMAACADFIAYSVLTVIYRAQTHPRDVMAVSSQCYASATAALQSHLKCFTYFRGRQTHKQTEYVNWILLYPSFTPFVIVFTHAITTASTADLALLQDTTSSLELIKGLSRGSMHLYTICDAFVRAAQILVNSQQTLTGLEQHQDGSLVIPTTDGPGNIALPDVSWPEDTFDST…
g468.t1	OJJ77281.1	OJJ77281.1 hypothetical protein ASPBRDRAFT_36487 [Aspergillus brasiliensis CBS 101740]	Aspergillus brasiliensis CBS 101740	99.9	836	1	0	1	836	1	836	0	1721	MRSSHLFQLVLALLLSLVTAEDGYDGWLRYAPVSCDLHCQQALPSHLVLLNSTKGSPIETAGRELKAGFQSILSKNLTSHTFQCNSSASILVATLDEYRQRCRHINVPELDPDGFWLQSEGETVRILGNNARGALYGAYEYLSMVAQRNFSHITYATSPHAPIRWVNQWDNMDGSIERGYGGASIFFKDGTVVEDMAPVEQYARLLASTRINAIVVNNVNANATLLLPENMKGLGRIADACRPYGVQIGISLNFASPETLGGLTTYDPLDPGVISWWQNITDSLYTYVPDMAGYLVKADSEGQPGPDTYNRTLSQGANLFARALQPYGGVLMYRAFVYNNNINESDWKADRAKAAVEYFKDLDGQFEENVVIQIKYGPIDFQVREPASPLFANLYHTNT…
g469.t1	OJJ77282.1	OJJ77282.1 hypothetical protein ASPBRDRAFT_113998 [Aspergillus brasiliensis CBS 101740]	Aspergillus brasiliensis CBS 101740	96.6	1030	35	0	1	1030	1	1030	0	2021	MKASLLLAVGLAAKACLGLVSAPSYVRQDNVTGSSLQDIVTWDEYSIRVHGERILLLSGEFHPFRLPSPGLWLDVFQKVRALGFSAVSFYVDWALLEGERGSIRAEGVFALEEFFQAATEAGLYLTARPGPYINAEVSGGGFPGWLERVHGRIKTTDQGYLDAITPYMQTIGRIIAKAQITNGGPVILVQPENEYTACVQDEGYTQVNNYSMPDINSSCLQKEYMAYVEEQYRKAGIVMPFIVNDADPVGNFAPGTGVGAVDIYSFDDYPLQWSTAPPNPSDWSALISPLLSYNETVHEEQSPTTPFSISEFQGGVPDAWGGVGVETSAAYIGPEFERIFYKINYGFRAAIHSLYMIFGGTNWGNLGHSGGYTSYDVGAAIAEDRQVSREKYSELKLQS…
g470.t1	OJJ77283.1	OJJ77283.1 hypothetical protein ASPBRDRAFT_233647 [Aspergillus brasiliensis CBS 101740]	Aspergillus brasiliensis CBS 101740	96.5	595	21	0	1	595	1	595	0	1175	MRLINTKTIQLEEYFDSDIPEYAILSHTWGKDEVSFQDIQTLSAGPRYRDRVIGKEGFLKIKYVCQQATRDGLDYAWVDTCCINRCSSVELSEAINSMFQWYMRSSKCYVYLSDIPSDYGVPLDTQAGSSVEPVRWRRPSKYDALINGPFARCRWFTRGWTLQELIAPKDVTFYGSGWNFLGTKVSMTALISTITGIAQRVLRDSTNTKESLRSICVAEKMSWAARRQTSKVEDEAYCLLGLFGVHMPILYGEGKAAFIRLQEETIKRSDDHTIFAWNYCDIEQESQYTVLAPSSSCFLKNVVQWSRPRSSGPYTMTNRGLHIPLPVISPSGSNHTCLALLDCHYEDDVTGALAIPLTLRSDNTYDIDYDSSRGRVVRVDLGLETRAMTRDLYIRSQPN…
g471.t1	OJJ77284.1	OJJ77284.1 hypothetical protein ASPBRDRAFT_190604 [Aspergillus brasiliensis CBS 101740]	Aspergillus brasiliensis CBS 101740	98.6	417	6	0	1	417	1	417	5.82e-302	827	MSTNSVHTHGASQNSVDGLIRQVAQAADAFKGTHDEADRLAALQAAQKLVAEFQKPQDAVYNLAYSPTHVMCVRIAMDLGIFSTLSERDGPVTLEDLAATKGADLVLTERVLRVLAGIGYVAEHDVRVYTSTTMTRQMTDRLSGAVVRFIFDIGMPTLAKVPEFLRNTNFQNPSGALNGALQYAEKTDKSLWDWVPTQPGFLDACNTFMEADRGSRPSWLEWFPVKEKIIDGFDVSESDVLLVDVAGGRGHDLVAFQSKFSEVEGRLILEDLPHVVAEATQHPKIEHVPFDLFQAQPIQGARTYYMKFILHDWSDDESRQILSHLAAAMKNGYSKLIIEEFVLADKDCAMLPAMWDWEMLIFCNSMERTASQWTKVLDSAGFRVVKFWAPPGDGQSIIE…
g472.t1	OJJ77285.1	OJJ77285.1 hypothetical protein ASPBRDRAFT_50205 [Aspergillus brasiliensis CBS 101740]	Aspergillus brasiliensis CBS 101740	90.9	406	18	2	1	387	1	406	7.60e-244	678	MPADKGPQITAVSWSFGSVSIIVVTIRLYTRLILTRKAGWDDFFIVLSLLSAIVCSGLAQTGVHYGLGKHMADIPNAEWKIEAFKYTVIAPNFSMVSTTTGKLSVAVFLLRLMGKTASPAKRWFLYIFSVISIAWNVLAIVAIMGYCRPAEKIWRPEVPGSCFSLKFQLIAGISQASFNAFADLTLALFPIIIFWSVQLPWKMKLGVIGVMGAGILAAAATLVKAVLLKSLPAHSDITWSWADITTWYSGAPIRSIEKMYVIIICATLPTLRQSYNFALHRTRYLGSYYKHSHSEAAAAGGAGAARQKPIPLARRQPDQSLFETFADETGLVNVASHEDSFVSPERVSNHTSITKTTEIEVHEESKSRGEIDNPHFPRANPFRRDHH
g473.t1	OJJ77286.1	OJJ77286.1 hypothetical protein ASPBRDRAFT_112583 [Aspergillus brasiliensis CBS 101740]	Aspergillus brasiliensis CBS 101740	96.2	553	21	0	1	553	1	553	0	1094	MACPPTTTCPIISPSLVTKTTFKPKEKRGSVSECESERNSQVLNTNTANPNVGPKQTGKDTDVRQDYGRDRDHPTGLPESTTCGMEYMPMNGFTWHSLHGSHDGLSVPKVDEEGLEIPAGKTSVGDESEATSSAVDTRTLKLNNVLGNRRKIVWAAPLPIGAAAHTAECGPHGGGPSGVSVSSKAVGDPIFEGIYGYDAGSSHGVSGGDCEDRESVEDDGEADKPGTSEFPAFSQVDYFTQHKRLEIRTTELPMRPKYSAATARIPCRDTVWAFMDRGDSENGMPTAADLPWEIRTLHEKTELNTIAAYLASMRRNLKDLDVKFTFHYRPVSFIDKADRDKKIGGYSSSDKQNAHTVADLYMHTKDDRNWGTLCVTREHHIQGLVWHYWAVAAILPPKS…
g474.t1	OJJ77287.1	OJJ77287.1 hypothetical protein ASPBRDRAFT_190607 [Aspergillus brasiliensis CBS 101740]	Aspergillus brasiliensis CBS 101740	98.3	361	6	0	1	361	1	361	1.46e-253	699	MTPLNHWGITLVVVPIVSCVVTTLFFILRLYSRRLVRQKLDAGDILMSIGLVFSYGLTLCTVISAFHGVGHDFWSLSRPTRGTVTLLFWCSTKFWVLTHVFVKISYIVLLRKLFGAITYWRKLTTALIVITLAWGIAATLLSIFQCWPVRYFWIKHIEGTCMRGRNTFYIVSGSVALAENFVLVLVPLVVVWRMKLSPRQKGELSLLFGFGGLVCSVGFLRLITFKKYVTADATKNGYLQSIWSIIELDLGIICASVILMRPIFHRLANLIKNKCCAIRSQTSKSSCSSKRVQMMSPLSWPKPLSFAGTGSVDEWSQVRAEAYSTRVHGSVDETHSLAGIRDIMVEVSIDREMRAKEEMMV
g475.t1	OJJ77288.1	OJJ77288.1 hypothetical protein ASPBRDRAFT_70737 [Aspergillus brasiliensis CBS 101740]	Aspergillus brasiliensis CBS 101740	96.7	419	10	1	1	415	1	419	1.57e-293	825	MPHPSNFSFILLSPSSYHELQVSLPITLTLAFLAYLLLASALRFQRVRNLYRDYPQYATRASLSQMTVQDAWAIQKNMLQLEFPTTAVKALQFALFRTYGIPTISSLLLQTSQFSNPATSFKRYADTGALIGQFMTCPPTSSRARTAIARTKFLHSGYRASGKILESDMLYTLSLFATEPIRFVERFEWRAMTELEQCAIGTYWKSLGDALDISYHALPSGKYGFRDGLHFLEELRQWSDRYEEENMRPDERNRLVADKTMDVIVYGFPKWVRGVGIQFATCVMDNKLRDAIMYDAPPVGYRRIFTGLVALRKYFLRYLGLPRPINLRQEVFSATPNEDGRYYVQIWKGMPYYVKPTVWNRWGPAAWLTWALGLPLPGDAGDTFHPRGFDVADLGPKHF…
g476.t1	OJJ77288.1	OJJ77288.1 hypothetical protein ASPBRDRAFT_70737 [Aspergillus brasiliensis CBS 101740]	Aspergillus brasiliensis CBS 101740	98.8	501	6	0	41	541	407	907	0	1001	MSSISAPPSPPPERRPPDRMDAWILGAGISSLTAAVHLIEEAHVPPSRVHILETLSQAGGGTISTGDSINGYDFRAGGMPPFNDVCMEELLSLIPSKTNPNQTVLEELDKFWDTEAVKDRPHTRFLTRHKHVLERIDAKRASLGLRDRVDLFMLASKSDKSLGRSRICDHFSKSFFKSCYWMLLSTTFGIKPVHSAAEFRRYLHHYLHDIHELHVRRKLDGGRFNRHESIISPIAQFLRSRGVDFRFHTTVTDIITTPSSCDPHRVSAIKAIHDNEPEQTINLGARDIVLVSLGSVMSGSTTGTNTSPPSLELMDIEKDLDENWLLWLELSTKNPIFGNAYNFCTRMAESRLESFTVTLSSPEFFNRFIALTGDKPGSGTFVTLKDAPWLLSINLPQQP…
g477.t1	OJJ77289.1	OJJ77289.1 hypothetical protein ASPBRDRAFT_202298 [Aspergillus brasiliensis CBS 101740]	Aspergillus brasiliensis CBS 101740	99.2	629	5	0	1	629	1	629	0	1131	MPEVINLLSSTPPPPVERREHLSVRRAHSQPPVVPASDSIFSDDIDISAFTYEDPIDQPAKRRRLSHEITPAKEVPLPPAKNSLFLFSDDDIVLSSDGPAPTKPSAWNGESDPIVFTSSAPEPTQNLPVRQAIRPHGVNPISIDDDDAGNFNNTRSNNRPRREEIQVSSDQLDFPDVDDLLDVAQRVEANAFSSRTANILATLQDRSRGSNGEPVSGSLRGRKHQAPSDDIEVEEMPPPRKPQRKTTRVTSEEKEAKAREREAAKAQRERDKQLEKERKQKAREDKAREKQLAADIAEVNKLKVDKKDSTHEMLVDLASTFTDTSVGNQTTEIMRLLKVDLSFFPSAIPNIVKWRRKVRATYNDSLGHWEPCTLHIRDEEEHVLSLLAAQDFINMIVAP…
g478.t1	GJP93879.1	GJP93879.1 alpha-1,2-mannosyltransferase [Aspergillus niger]	Aspergillus niger	92.3	508	31	5	1	505	1	503	0	896	MPPAKITIIHPDLGIGGAERLIIDVALALQSRGHPVTIYTSHRDKSHCFEEARDGTLDVKVRGNTIFPAHVGGRLFVLMAILRQLHLTWELLSSYGNEATSGEEEEEEEVFIVDQMPACVPFLKVFGGRKKKGSKKQRILFYCHFPDQLLARRDEGGSVLQVLKGLYRVPFDWFEGWAVSASDKVVANSRFTRGVVSGVFGREKVGDLSVVYPCVDTKAGDGGEGVVKDGEKLWGGKKILLSVNRFERKKDLALAIRAYHGLGAEKRKGTRLVVAGGYPVFVDCRGCACMLIESLLTGCSIDAGGYDNRVQENVQYHRELDQLATGLGLQTATSKTVISALSIPDSIDVLFLLSVPTAFRDTLLLQAKLLLYTPINEHFGIVPVEAMRAGVPVLASNTG…
g479.t1	OJJ77291.1	OJJ77291.1 hypothetical protein ASPBRDRAFT_50212 [Aspergillus brasiliensis CBS 101740]	Aspergillus brasiliensis CBS 101740	98.7	1752	22	0	1	1752	1	1752	0	2925	MTGSQPESPADAPQRPFSGIMRTPRSTSRLSMSSRHGGGSRASDEDGKTAVKVAVRVRPPLKPTDPGYELVPQRFQRPMVHVTNPTSVAIDVPQGRKLFVFDRVFAETVDQDGVWDYLSDSVGSFLQGYNVSILAYGQSGAGKSYTMGTSGPTEQSDPRSMGIIPRAAQLLFEKLEGPTKPNRNSGTGLRTPSRYSIGSASSFGKASVEKNWQLKATYVEIYNEQLRDLLVPDSTHQADRGTVTIREDAKGRIILTGLHQVNINSYEDLMGALSFGSSIRQTDSTAINAKSSRSHAVFSLNLVQRKASNGVMSPTPKEKRMSMPVEMMSGSDASIMVDSKLHFVDLAGSERLKNTGASGERAKEGISINAGLAALGKVISQLSSRQAGAHVSYRDSKLT…
g480.t1	OJJ77293.1	OJJ77293.1 hypothetical protein ASPBRDRAFT_140953 [Aspergillus brasiliensis CBS 101740]	Aspergillus brasiliensis CBS 101740	98.9	377	4	0	1	377	1	377	9.50e-283	775	MEIPCLSPAVADDIVPDLAQIFNDNPFKSLREQKISVPVLCGPHEQGPTDTHINIFGQEFRTHSSLIKEYTGIWKERQRGEYAERRGRHYFEARTEKDGGWGIYRKGAKYYRDYPDLPDERIPSAIESFHCFLQALYLKPVPYVGIKGWRRMVLLGIRFQAVPRMREYIEKIILPWTLTSKPLLGLTDDILAYTKMAQDIQCAQLYRECLIHLVGMAQYWGRNEFHNAESVLSPSTYSSLIRHVGTQRQLIEKADVALHTFIRTLATQKPRRIPNFLLRQFTDTVDNITGLNGRNMNSLGYYQHIRLVLHDMQMRIPGGATYNMCHRLWQFIGCLCVNGLQYTQDQVKGYPVCISSRDIELPWVLARAPEEVQAEEE
g481.t1	OJJ77294.1	OJJ77294.1 hypothetical protein ASPBRDRAFT_234799 [Aspergillus brasiliensis CBS 101740]	Aspergillus brasiliensis CBS 101740	100	391	0	0	1	391	1	391	1.06e-293	803	MYLSFVSLLALSGIATAHSGHDQTPLAGPHQKLWYNTLPGDGGTQADSVFSGISTFGRLPYFPCLSSEDERYDIAFIGAPFDTGTSYRPGARFGPSGIRQGSRRLNLYGGYNVPLQANPFVSDMRILDCGDIPVTSYDNAWAIQQIEEGHNSVLMRKPFTDAEKYGLSKAGKTLPRIITLGGDHTITLPLLRSINRAYGPVTVIHFDSHLDSWKPKVFGGSPSQVAAVNHGTYFYHAAMEGLLKNDTNIHAGIRTTLSGPSDYENDGYCGFEIVEAREIDTIGTDGIIKKIRERVGTENPVYLSIDIDTLDPAYAPATGTPETGGWSTRELRTIIRGLDGLNFIGADIVEVAPAYDTNAELSTMAAADVLYEILTIMVKKGPLSVGRSDEL
g482.t1	OJJ77295.1	OJJ77295.1 hypothetical protein ASPBRDRAFT_114925 [Aspergillus brasiliensis CBS 101740]	Aspergillus brasiliensis CBS 101740	97.8	504	11	0	1	504	1	504	0	971	MYDSLPSYRETPSAHTHGEEHTPLLSKHVNINHDSRSAGLPIPVLGEFVRLLKDSIPVILAYTLQNSLQTTSVLIVGRTSPENLATTAFSLMFAMVTAWMIALGGTTALDTLASSTFTGSSNKHDLGILLQRGFLVLGLFYVPVAILWACSEPVFLLLGQDPQLSRDSARFLTCLIPGGLGYIYFEAMKKYLQAQGIMRPGTYVLLITVPFNALLNYLFCYTFHMGLLGAPIATGISYWISFALLVLYGRFIAGSECWGGWSRKAFENLGTFARLAFLGVVHVGTEWWAFEIVALAAGRLGTIPLAAQSVIMTADQVLNTIPFGVGVATSSRVGSLLGSRDAAGASRAANAAAWLSMVLGGAVLAVLMGTRHVFAKIFNSDEGVVQLTAEVLPWVALFQ…
g483.t1	OJJ77296.1	OJJ77296.1 hypothetical protein ASPBRDRAFT_166051 [Aspergillus brasiliensis CBS 101740]	Aspergillus brasiliensis CBS 101740	97.8	511	11	0	1	511	1	511	0	984	MDLKSTQTDDILIPEKQSASDISSLPVEQHGTHVHPMPTSDPLDPLNWPRWQKHVILGIVMLKYFLFTYITTTTVPSFAEIQSQYDINYSQVNWTVAIPALGLSLGPLFWSSIGDIYGRRIVFIVGTVIALVATVGAAVADTYGGYMAARFFQGFGVSPSSTVGMAVVTDLFYEYERGQKLGLWVLALDSGLLLGPTFGGFLNLVSAQWINWFNAILFAALLLLELAFMPETLYPRALMVQHMTATEKPAESSAGIEEAEINRTKSLPFLNLRPIPGLSHPPIYASLTRFLLTFRFPVIPVAVLGYSFTWYWWILSVITMVPSAYATDSPLIQGLLFLGLLIGTLVAEVSCSGRLSDAIVGRLAKRNGGIRVPEMRLWLAYPAIILTAVGLIVWGISID…
g484.t1	OJJ77297.1	OJJ77297.1 hypothetical protein ASPBRDRAFT_24982 [Aspergillus brasiliensis CBS 101740]	Aspergillus brasiliensis CBS 101740	99.4	716	4	0	1	716	95	810	0	1325	MPARRGAVRRAGSTPRSDIGSASTYFQSKLGPEARTQALPNLPTKQSFAYGSAETPILPRELKIQPHMDLTEMADAIDKGIEDAKDRQMKEKENTQDKSRRQKSPSISRSPVRRSRREPTPDELQLLDNLREATKSPTPVRGNYSNNDQSTATPTPPIPHTLSTASSPAQPLPVPRYPHVPADNLYPSPMGRFGPQLHDGSPLGSSPLPDNSSLYSFGVERAVNSDELTRTLSDGKNIKAPPRRFSGLAFANEPIHEEEEPDSRLLKTKSRSPSLQPSYEDFQIEASPEPEPQSEPEYVHEPEPEPTPEPEPIPELEPTPEPMPEPTPEPEVIREKSPAAQFTAPTKTLIPDKYARKVPSREPSVGGHQQNISQTGQHWSWVGSLSAQLPSLSTLARMI…
g485.t1	OJJ77299.1	OJJ77299.1 hypothetical protein ASPBRDRAFT_36512 [Aspergillus brasiliensis CBS 101740]	Aspergillus brasiliensis CBS 101740	99.8	656	1	0	1	656	1	656	0	1170	MDKHRRRDESPSGLSDIVEPDGLLGTGITSRHIEAFGRKVTSTAGHLMGPAPDSSSGGHYHTAMADIQRELRHPNTQRKVFSLTQTTPTDLVRSKLSTTEIQSRAISSLPDELLANIPDDSSSYSLFQGFQASQDDIEYRRAHRRRSSKSKKLLKDGETRGALPSAPSDLKKERDLLSRRMELMGVRKNMCSSEIHEIDNKIANLHNMRKIVLDRLAGLEMEEADLEHELNEIENKLEDIQEEQEAEVPPPATPKSSEANDDSIVSEDPAMGASFMSESIYQKIPSPKSVKQRSIRKRSMPVLHEHFAPGSEIKEMPAHSDMVTAIDFDYPFGTMISAALDDTVRVWDLNVGRCVGFLEGHNASVRCLQIEENIVATGSMDASVKLWDLSRARTTTRDN…
g486.t1	KAI3002811.1	KAI3002811.1 hypothetical protein CBS147346_5723 [Aspergillus niger]	Aspergillus niger;Aspergillus awamori;Aspergillus phoenicis ATCC 13157	98.9	266	3	0	1	266	1	266	1.03e-187	525	MDTAIDLSDASKALDLANIRFQLIRLEDTITFHLIERAQFPLNKPIYVSGGVKIPGTDLSLLDYFLREQERLESRVRRYQSPDEYPFFPDSLEEPILAPIKYPKILHDNDVNVNSILKQRYVEDILPAVCAQFGREDRGEAQENYGSAATCDVHCLQALSRRIHFGKFVAEAKFQQETERFVKLIKANDRKGIDEAITKPEVELKVLERLALKAKTYGTDPGFQPENGPKINVDAVVAMYKEYVIPLTKVVEVDYLMQRLKGTQWE
g487.t1	OJJ77301.1	OJJ77301.1 hypothetical protein ASPBRDRAFT_24985 [Aspergillus brasiliensis CBS 101740]	Aspergillus brasiliensis CBS 101740	100	293	0	0	1	293	1	293	5.95e-196	548	MVKRKELKDNDVEMSGTDPRVDGDDSDEEMDMVNVDFEWFDPQPAVDFHGLKNLLRQLFDTDAQIFDMSALADLILSQPLLGSTVKVDGNESDPYAFLTVLNLQEHKDKPVIKDLTAYLQRKANATPSLAPLAQLLSQTPIPPIGLLLTERLINMPAEVVPPMYTMLQEEIEWAIKDKEPYSFTHYLIVSKTYEEVESKLDAEESRPQKKKKKAAGGEKAERFFFHPEDEVLERHAVCVGPVEYTHKAEEGLSDAKRAFQDLGIVTKGSLILLEAGKLDGAVKDMTEYIKPPV
g488.t1	OJJ77302.1	OJJ77302.1 hypothetical protein ASPBRDRAFT_36517 [Aspergillus brasiliensis CBS 101740]	Aspergillus brasiliensis CBS 101740	98.7	239	3	0	1	239	89	327	4.84e-166	471	MTTPTLDPQYIQLFESLESQFQTTTLPHDKWYILAISTLVANPDPERADQLYLYLTSKTEYSTPSSRQQLIRRIREALIKSVIIVGVCKPIEAILAISKLEAPEDKDYTFTRENWQCDEANHERGVAWLEKLYARNTSGTLDLFAAHKDFAWLSKEITYGLFLSDRGVLDDLDTQLVVLPAIMSQNLRIETHWHIRGTRRLGVSLEDVKVLCEGVKHVAGFYGRVLDKVPTVEEVEKDV
g489.t1	OJJ77303.1	OJJ77303.1 hypothetical protein ASPBRDRAFT_115268 [Aspergillus brasiliensis CBS 101740]	Aspergillus brasiliensis CBS 101740	98.4	123	2	0	1	123	1	123	1.13e-71	220	MSSSGAGQSSVGSRAIYEAGDQRNVPQSVIDEQNRYAEGQKNSHKNLDSKDQRSIGNKLAAQESKPESDHHHNFVQNPEAELSKQDPTKPAKVHGNKPSKGAEIDAELQAEDEQRLREKGIKK
g490.t1	OJJ77304.1	OJJ77304.1 hypothetical protein ASPBRDRAFT_190623 [Aspergillus brasiliensis CBS 101740]	Aspergillus brasiliensis CBS 101740	100	491	0	0	1	491	1	491	0	990	MPILRPGRLKTIISATAALLLICTVYIYWAPPPASVVPSTAFEVPLAERQNAFWKVLKPILQGHAPNTPTPKRLADVNAAHFNATTTDSRPDLTIIEDGDLLAMEEAHAGYIEECRKSERLRPVHTPGTRGIVSTAGASYFPVFLSSLRMLRRLGSTLPVEVYMKDKSEYEKQICDEVLPGLGARCLVLSEIVGKGAIEHYQLKIFAVLFSSFEEVIWMDADCFPLQKPETLLESEPFSSKGLVTWPDFWISSASPLYFKISRQEMPALSERASSEAGVFLVSKKTHQLTLLLAAYYNYYGPSHYFRLLSQGAPGEGDKETFLHAASAVGEPFYAVSERVQAVGHSKPGGIAGSAMVQTDPVEDYALTSAGKWRVQDESVAKAPHAFFIHANYPKFNPA…
g491.t1	OJJ77305.1	OJJ77305.1 hypothetical protein ASPBRDRAFT_50224 [Aspergillus brasiliensis CBS 101740]	Aspergillus brasiliensis CBS 101740	98.3	589	10	0	1	589	207	795	0	1159	MEPEQTPVPVQSPWLAQASEQKDHASDEQNEETCCNDVSPCMSACQPPSLSQQLLARSVGRTPRLRYLISYYAEVIAPMIVAFDSPTNPFRTYILRLAQESTSLQEAIATLASCNLRQRRERGTRSTERTLPGRMSSMAHQALTDGALQDRTGISIPEGHAQEEQYHRGMAVSALNRELADPRQRLSDSVLATLLILCLFHGCDTGIAQFKTQFAGVTKLLAIRLCNSPCMSDELKWFVRMFTWIDTMTATTNDREVQLRGACLDITAASDGEWGLENLAGCDAGLFRIVAQLGRLNLLSQNQEVCTSTPPDIHLPSTTLPPSMAFFPSNVPATSSGAFAFSLSPPPPAGRNGSQLPSDFWAEWYPLRQKLESWRFVPHRSQSGSPLFASSHAYISPPS…
g492.t1	OJJ77306.1	OJJ77306.1 hypothetical protein ASPBRDRAFT_50225 [Aspergillus brasiliensis CBS 101740]	Aspergillus brasiliensis CBS 101740	99.5	375	2	0	1	375	17	391	3.92e-253	700	MTSPPTSPHYAYYATQFASPYTSPRGPSKRHNRKASYAGPRETAGWYSGYGHGLYEAMPEQGTPPRKHDPVSASFGGYHRRRSTMSGAPAGQWESAGAPPSHKRPIFVDVVDDGYNDAPRYVFREEPSPPRRKPSTPQRKPKPPTDQYFYYNQVPAQDDVDSAKRARARRQSTSTRTPSKPKPAPAAKPPPKATEEDAARAGIPEGYSIKNWDPTEMPIILLGSVFDANSLGKWIYDWTVFHHGASTPMADVAGDLWLLLIKLAGKVKRADECIDRIKRRDARETVVDFLESGERLWVRFKKLLKTCEQFMWKAAKREGGKTVSMGRNAGCEFVETIFGRDRELESTEKLMNSIRLWNMRFDANCEEILRRPTSV
g493.t1	OJJ77307.1	OJJ77307.1 hypothetical protein ASPBRDRAFT_50226 [Aspergillus brasiliensis CBS 101740]	Aspergillus brasiliensis CBS 101740	90	439	6	1	7	445	1	401	9.82e-286	786	MVTTRKMKQKEEGKGPALYPNAEYLCQREEYHDIMKHHLNMGMLTRPHIRSAPEIIRNGFDRLALRVRGWAMSWGEAQPMYRLSIDDKRAIIASLDGFCVQDDWDSIYSSLPPGGRAEIGIVLLEALLNKFIYDKFASSTFWFMDAKIDATDQEGDANFYKRFDYVYERFKESKLRDPFDLPSSLPLSFLSPRCLSRTSLTFTLSLFPLVALPQDAAWWKSILVSVCTLSPTAWGHNTAPPTKLYHPTLERSKVLLKAYGDELLASRPFQLLCQGPLSEEMQALREERTRQVLNTAAHEFMSLQGQFFGNLVVERLPELPTFDRHLKNMNSHILHIGFKPHHGARVLIVTSPHYSYHNIISPNGWGSRPPLQIIPAQVLTAPKGPKARAQWAAGNTNPK…
g494.t1	OJJ77308.1	OJJ77308.1 hypothetical protein ASPBRDRAFT_202315 [Aspergillus brasiliensis CBS 101740]	Aspergillus brasiliensis CBS 101740	91	534	25	1	1	511	1	534	0	971	MNNHRILWVPPDGPGWIIPTAIDYDGNGQTFWGNAAAERPNPHIWFKLFIKGSPAVDLQGHNLVGATGGNVGRDNADRFIGDFLSVLQQQLRVHLQGYGPARIEWCFTEPGCWSDEGRLDFRNIVQDRVFNGHARDVSYVSEAEAAAEYTTVEGVCRGLIQQGDVVMVGDCGGATTDLAILQVTGTNPFASQPIGKPDSFRLGAVDIDAALMEQVRRRYWPNDRGLRRGARAAQVRRDVSRVKEDFTGLPEDDVPQFELETPNGEVVEHQFTDADLRRAFNPTVTQIVEAIIQKILLAEARVTKVVLVGGLGSSEYLRSRVRLALDGLDRAFQLVDVLPDTITSAVAHGAVLRAQRSPHVQWFESRSDFQLSFPFVNVYRPNFPSQVLSATIIPRGRRD…
g495.t1	OJJ77310.1	OJJ77310.1 hypothetical protein ASPBRDRAFT_190628 [Aspergillus brasiliensis CBS 101740]	Aspergillus brasiliensis CBS 101740	88	158	12	1	1	151	1	158	5.40e-79	241	MNLSSHNPLLHYLSVGIGAGFYGDALYNALQGDDSSTSQQITSSSTATSSPSSSQPTQKGQVVVVREASLARDPIRLSLRDGQSTVSDQDGEFGKTAGKSIPSILNRQLKCTFGPVGASQGKRQATGSGALENLEKKRRACATVRSQNRAQEA
g496.t1	KAI2862001.1	KAI2862001.1 hypothetical protein CBS12448_4688 [Aspergillus niger]	Aspergillus niger	56.4	326	66	3	1	252	1	324	2.20e-119	355	MGSTSTAWEVSSFEVQTDTPIATSDSLYTNSNMQVPVVVVIKTIDSDTVMPYELSESDLKTIKLVDYDDPPTELSGAWSYSTTENELSDLNLRKGDTTTGSGENIIYLGDWSQTNYYLTAGKYLLRKADFDGYNLGTDMGIQDRSLEYATALFSPRPSKSDVFYYWPMGPKETRRAGRGTANVEITVNEEENALGFTYLHVELFDWIWFNDDYVGEGRFTFYDQFGNPGIFWVGYKDDHTTPEILDHKYDPDDDGGDDDDDDDAELFCIHVGCEARWS
g497.t1	OJJ77314.1	OJJ77314.1 hypothetical protein ASPBRDRAFT_36534 [Aspergillus brasiliensis CBS 101740]	Aspergillus brasiliensis CBS 101740	100	85	0	0	1	85	1	85	1.33e-50	164	MSSTSSNPVSRFAEAAKEKIAPSTSSKAKDPTENWTPEEMFETTLDRNGNPVPNADSFIDGDKMTQRRQGPDEGDLFEAANEDFD
g498.t1	OJJ77315.1	OJJ77315.1 hypothetical protein ASPBRDRAFT_190631 [Aspergillus brasiliensis CBS 101740]	Aspergillus brasiliensis CBS 101740	100	659	0	0	1	659	1	659	0	1266	MSLDPRFYHHIGHGSGPGSQSSASSSGVSAITGITSPSAHSMTASAATLRSTASSPSLRAREGVAVSAHHRVDSMSSPSAGGGNVRVVVRVRKFLPREINRNAECLISMDPHTQTTKLRAPQISPEDEGKPKSQARGKVLEDKSFVFDNSFWSHNERDPHYAHQEDVYNCLGEEFLDHNFEGYHTCIFAYGQTGSGKSYTMMGTPEAPGLIPRTCEDLFQRIESAESPDISFNVRVSYFEVYNEHVRDLLVPRSDPPHYLRIRESPVEGPYVKDLTEVTVKSFDELMKFMRKGDVSRTVASTKMNDTSSRSHAVFTITLKQIHHDLSTDETTERTARIRLVDLAGSERAKSTEATGQRLREGSNINKSLTTLGRVIAALADPKPGRAGKRKGKDVVPYR…
g499.t1	GAT19186.1	GAT19186.1 translation regulator GCD7 [Aspergillus luchuensis]	Aspergillus luchuensis	88.7	573	56	1	40	612	63	626	1.04e-276	780	MKQQQQQQQQQSGVSQGRERVSSPATPTTSTSSSTSSSAEKVSNAPPDRLDTPPPPIYCTSPLIMATPVESSQPPAEMQSQQSSSASPAAAAAAAAAGANASSAKPAKPQQSQPAKQQPQQQQSQSKGKDNAAAAAGGDGAALSPAELKKKAKAEKAARRARERAEREQSGGGAGGAAAPGGGQSAAGGKKGASGPGGAGAGGKDATGAATPQKGGHQKQQPRRGSAQATGQLGAADLKKKQEEKNVSVFGHLYGQQRRTTIAGAGKEVHPAVLALGMQMRDYVVIEAYTTPLGTSLARHLTTHLSHQITYLSTCRPLSISQGNAIRALKLAISSIDPSVPEATAKASLCDFIDSFIREKITVADQVIAGSAAQKIQDGDVIVTFAGSSIVKQTLLAAH…
g500.t1	OJJ77317.1	OJJ77317.1 hypothetical protein ASPBRDRAFT_36536 [Aspergillus brasiliensis CBS 101740]	Aspergillus brasiliensis CBS 101740	97.7	173	4	0	32	204	2	174	9.48e-87	263	MVPPSPPSIPIPSSPPPPKHIPTTNMKFHKQSKDSTPTQIHMHHPRLADYFEDFTRPHHTSTSTNNPYSTSNPYTANNQTIAAAAATAAATSSTSPTLTPSFLPIEDIYVPPQYQPPNPEDEDDVVPDQHAAFGIARAMALQGRGFGGSGGAGAGGRGEGVWRDLGLEGLVTGSGGGSGSGGDKVRVRGEGRLMGGRRRVVCLR
g501.t1	OJJ77318.1	OJJ77318.1 hypothetical protein ASPBRDRAFT_114548 [Aspergillus brasiliensis CBS 101740]	Aspergillus brasiliensis CBS 101740	98.9	651	6	1	1	651	1	650	0	1241	MEDSVAELNELFAAAAPDGLSKDVLTELQSILRIHSISAQELFYKWESYCLKMGPDELKMDLGTVRLFKKDVQDTLEREARGKAGRQTTERKAAVPATPRAATTDVFGMLDGLTPGASGRSNAGSAKRKSDFASPSISKIGRTDHNGSPMSASVKQTNGDGLQSIPFSQRQNAGETIETINSHLPQAEAPIAPYSEARIRPTANTDLKKFGYKPMAMRLAEASEILDDRIDEFMALYEKQYGSDEITFGSAATQSTSEIVAVGRIASDSMEGKLNTASLVLETSRRTGAGIRVPLKLESVPSANFFPGQIVALRGINASGNYFSVKEVLPTPLLPPAASSVVNLETINQRLEDAGPAPLNVLVAAGPYTADDNLEYEPLKEICRKAADTYADGLVLLGP…
g502.t1	OJJ77319.1	OJJ77319.1 hypothetical protein ASPBRDRAFT_36538 [Aspergillus brasiliensis CBS 101740]	Aspergillus brasiliensis CBS 101740	99.2	388	3	0	1	388	1	388	1.97e-267	737	MSAPSDPPTAAPADNTPAVDASQTTPSDPSPSDPAEIAATPETTTKPTESTEQAKKDDEFESQLPLSAADGLIQKPFPRPLESAKPTPPAQLTSDQQAKYKEVLKAVSEWTTVPTTSAKNSPTAPITDDERMFLTRECLLRYLRATKWNVSEAIARLQRTLTWRREYGVEKLTADYISVENETGKQVILGYDIHGRPCLYLLPSNQNTETSDRQIQHLVFMLERVIDLMGPDQETLALIVNYKETKSGQNASIGQAKQTLNFLQNHYPERMGRALVINMPFMILGFFKIITPFIDPLTRQKLKFNEDLGQHVPPGQLMKSMGGEVEFRYDHSIYWPTLNKLADQRRAAYKERWIQGGKRIGEFENYLKTGTSPSLSQTEGANGEQPTA
g503.t1	OJJ77320.1	OJJ77320.1 hypothetical protein ASPBRDRAFT_36541 [Aspergillus brasiliensis CBS 101740]	Aspergillus brasiliensis CBS 101740	96.5	458	6	1	1	458	1	448	1.27e-273	758	MEEAPQRVAVVPTGRMSNTSGRPLSITDDTSTTTTTTTTNTTTTTTTSTITALTSTATAAAAAAAASTRSTPIQPYPRPPSSTGSYPSPIPSPVPDRRPVRGHEGGFVYPAFFLRPRGLSHPMGPPQPERAIDREERQALRAIRNFLKVRTSYDVLPLSFRLIMFDTSLSVKESLNILIQNGMCSFLPISAGIVSAPLWDSTSSTFAGLLTTSDYINVIQYYYQNPEALNQIDQFRLDSLREVEKALHVAPPETISIDPERPLYEACRRMLESRARRIPLVTFDSQTDRALVLSVLTQYRILKFVAVNVNDTQKLRKPLGEILLGSYHNIAVASMDTPVIDVIHILVSRSISSVPIINTEGVVYNVFEAVDVITLIKGGVYDDLTLTVGEALKKRSPDF…
g504.t1	OJJ77321.1	OJJ77321.1 hypothetical protein ASPBRDRAFT_190636 [Aspergillus brasiliensis CBS 101740]	Aspergillus brasiliensis CBS 101740	98.3	692	12	0	1	692	1	692	0	1303	MDTIESTSDSLKQSMDQRLSLSAPFSSVNAGLAASLGARDVAIQHKSRRNTVLLPKDVAAPKRPVLDSYPAEKGSRLTGFKTLFRSRKSQHFRLTSGSSGCSGQPTIVVEEGCDEDCSTPTDHQENQQQSVGLQISPSSDLLNGDADRKVSDKTVYSLSSDLTSVTVCHDTSKRKSMPIALVDQDCLYHDPCSDIQEASHSTPQSSVNYDDLKAATTSSTRQHSSECSGASVLSAYPIRTTEKPENPFAQTRSYRSRRSSRQSSDFAASLDDSYALAQEDRHAAIIAYNELASRMRLEPLEVDETLGAHGHAEWGQMSAERSPDSRQSHPAAGDDHPRRRDKFYGRLRTMRSTLQLGSSDAPRKRTLRRIRTFASISRRSSDMTSLKGKPLEDLARLGG…
g505.t1	OJJ77322.1	OJJ77322.1 hypothetical protein ASPBRDRAFT_25002 [Aspergillus brasiliensis CBS 101740]	Aspergillus brasiliensis CBS 101740	99.4	342	2	0	1	342	1	342	1.15e-229	637	MADQASFGRPIGPGEAVVPNETVVPGAVSAAPSHFTVANSYLTADILSLSYQSVEEQNIFGFNPVSPSLQAWQAKNDPQLFTNPGLERGLKNSHVRNGQPTPPPFDDKRLNSVDEMFSVSQYQSYEGTAYANPTPRGSFSQPAASEGAEPPSKRRKSSKNSTVNSSSPESGDKESEKAKREKFLERNRLAASKCRQKKKRQTEDLRDQFKFLSERKEYLTRLIDTLRSEILLFKNFLLEHAGCNDEAISLHLSTMVKNITQQDSLGSSALKTDLDALTPSSSSRATRSQDLSFGFDSPIQLPSKMGSLEPTPRRDSEQSLVSDASYSFSTPNNDAFEDLLDV
g506.t1	OJJ77323.1	OJJ77323.1 hypothetical protein ASPBRDRAFT_114808 [Aspergillus brasiliensis CBS 101740]	Aspergillus brasiliensis CBS 101740	96.6	560	17	1	1	558	1	560	0	1075	MRPYSELPQDADLQDPSHDPPPSGSQSVFRLYWLTAIVCCGGLLFGYDSGVIGGVLTFESFHRSFRYTAADETRVSAIAVGVQQASALLGCLLIWPLTNRHGRRPAMAVCSLIFCTGVIFELLDTHSLSVFYVGRVICGLGIGGSATVIPIYLSEMSPTDKRARLGSCYQFAFTIGILVSYWIDYGMQFAPANALQWQIPFAVQLIPGAFMGLGMLTLRESVRWLLSHDHDNNESKAWDSLTWIRSSSGPHVRAEYQQMKSSIERDAHATADFSPKELLSKSNSHRLALAVCLFIAQQSMGPTALAYFGPQFFALLVGNNAHLTLLLTGIFGGLKVIGCLIFIVWVADRFGRRPLLILGALAMSICMITTSLVVKSTNVPTPHPSTHTSDNTPAITHSG…
g507.t1	OJJ77324.1	OJJ77324.1 hypothetical protein ASPBRDRAFT_70766 [Aspergillus brasiliensis CBS 101740]	Aspergillus brasiliensis CBS 101740	97.4	666	11	2	23	682	2	667	0	1276	MEVVSYPQTLNTNHKMHLLTERKAPRARGMGRSGPRRRTGCLTCRARKVRCDETKPTCANCTRLRLQCTYKSTIQAIIPRQRHNSQSSGTVGSTTSAPTSTASTTSSDRPDVNFFHTVLCNDRLSASNSGSPQQAGPSNRPPYHPNHQEQQQPLGADNITSFDILSFIGEITSDFQQKHLDLTTNGLAGFPAGSLPAAIANEELNQNERPISWDAGSLPVTHGEHSEVRSSSDTSGGSNGGHGRLTYEDRLFAHFMDGDPPPTIFGPVDLEWEYVRANVVAQSRDSRAVLHGIYCYAEIHEALVEGKAWKLASRYHQLACSEIQSCLLGEVGETGLKRVFTTVLLLMLAELLSTPDLWGSGTSFLHSAYLLLQRFHHRTKLWTGVNYVIVSWVALLDVK…
g508.t1	OJJ77325.1	OJJ77325.1 hypothetical protein ASPBRDRAFT_36545 [Aspergillus brasiliensis CBS 101740]	Aspergillus brasiliensis CBS 101740	98.6	511	6	1	1	510	1	511	0	958	MAESPLLQAHAEPRTSCDSQDPAEPFLPRPSAPGSSTHQNPKLILYRLYISHFLSTWNSRMFEFGAVLFLATIFPGTLRYASVYALVRSLSAVVLSSWLGSVVDRANRLRAIRHSIIWQRLPVAASCACFTVLLRPSTMAFTSLIFAVTVLLACVEKLAATANSVAVERDWAIVVSDALDIPRQDLNASMRRIDLFCKLLAPVVISVVDGLSTKIAIWTVLVVNVSCVLIEYIAIAQVYTSIPALERCQDGSSEIGGELGREPQDRDSTPTAARRIAQYISTALAPWREYVASPVFLASLALSLLYLTVLSFGTTMVTYLLHTGFTPLQVSGMRIGAVIAELSGTWAAPFIMGKIGPIRSGLWFLNWQFACLAAAVAAFALLDNQSQVVAVSLIVGVAL…
g509.t1	OJJ77326.1	OJJ77326.1 hypothetical protein ASPBRDRAFT_70768 [Aspergillus brasiliensis CBS 101740]	Aspergillus brasiliensis CBS 101740	99.4	472	3	0	1	472	25	496	0	917	MPLRAKVTNPAFGATASMSTAPIPKELPGDEPDDVLFHSHYGVRLIELNRPKKLNSLNGSMVRKIVPRLKEWEKSDLANVIMLSGAGSKALCAGGDVAALALQNEKGPEGQQASSDFFADEYRLDHLIATYQKPFVSVMDGITMGGGVGLSVHAPFRIATERTVFAMPETTIGFFPDVGGSFFLSRLDGQLGTYLALTSERLHGVQALYAGVATHYLHSSALANLTARLSELVFRDYATFQDRLALVNKTMAEFSTGVPSVREEPIQLAGKLRSAIDRCFQYNTVEEIVQALQNETEMKSWAEKTLETLSARSPTSLKVTLRQLRVGQQWNIQETFQREHSIASKFMRHPDFVEGVKARLMSKPPRQATWQPATLQEVSTEAIDEFFELPEDGPRLDLY…
g510.t1	OJJ77328.1	OJJ77328.1 hypothetical protein ASPBRDRAFT_36548 [Aspergillus brasiliensis CBS 101740]	Aspergillus brasiliensis CBS 101740	99.7	289	1	0	1	289	1	289	6.56e-207	575	MPGSDALRALKLLSRSSGGLLSGAETTTQRCLTKPFSRSMATEAQSPVDNLTREVPKPVWNPEPVKATLYSFPSMEPLRFVEYPRNHLLMPLRKDILHRAVVYEGDMTRQGTASTKWRDDVHGSGRKLHAQKGTGKARVGDKKSPIRRGGGVAFGPHPRDFSTELPQKIYDQAWRIALSYRYKRGQLIIVDNEITLPEGATPHIVEEIFKVNCWGRHYGRSTLITDQPNEELFETVRHVGEHAKILDRRDVDVKDLLETGRLIIEKQALDRILSQHSRDLKNKPAKALY
g511.t1	OJJ77329.1	OJJ77329.1 hypothetical protein ASPBRDRAFT_166102 [Aspergillus brasiliensis CBS 101740]	Aspergillus brasiliensis CBS 101740	99.5	420	2	0	1	420	1	420	1.86e-295	810	MAHCERASKPLLQCLQKTYTKGLPGLQLQSTRAFQSTALAREEAQAEAKSVPFHKAPDPALVTSPRLERRLLRQGIAPVGSRRRRAALQGSSNIPFEQLPFQCFQEARKILIADREEKVRDIQSMSEKIARLQAVPTEEAGGLQVKKSKLRAMEQHLEHLKILADVNDPLVKKKFEDGQGDLSKPIYRYLADRKWREYRRKILVQRITQMKVIPDVLPHCDPIVDTKLYFNRSQVQPGEYVNAKASTTAPKLDVQLFEGGEKLVTIAVVDSDVPNVETDGFDFKMHYLAVNVPISATNTKVDLAQLSADSQVVLPWEPPVAQKGSPYHRLSLFILEQKDSKPLDFAAVKAQETERQNMLPRTLQARYHLKPIGAHLFRTQWDETTYEVMKQIGFPEANM…
g512.t1	OJJ77330.1	OJJ77330.1 hypothetical protein ASPBRDRAFT_50241 [Aspergillus brasiliensis CBS 101740]	Aspergillus brasiliensis CBS 101740	100	178	0	0	1	178	1	178	1.26e-133	381	MDRFLRATLKRSTPSHLMRFTFNSLGVFCACTLIWEHLITVQLSEGPSMYPTFSPRGDYLLISRVHKHGRGIQIGDVVRFYHPTFLGVNGAKRVIGLPGDFVCRDLPFSTEVGKEGEMIRVPEGHVYLAGDNLPWSRDSRNYGPIPMALINGKIIARVWPLHKFEWVKNTFETADLSE
g513.t1	OJJ77332.1	OJJ77332.1 hypothetical protein ASPBRDRAFT_190645 [Aspergillus brasiliensis CBS 101740]	Aspergillus brasiliensis CBS 101740	98.7	229	3	0	1	229	1	229	1.26e-165	466	MTTETTDGLPGTAKTTKSQVLEAGACAIQDFTPVKQICAHLNAFHVYASDKTRCVEANHYCSHITEDLRQCLLYDSTAPNARLLGIEYMITPKLFATLPDSEKKLWHTHVYEVSSGMLIMPAPASIPNAVWEAAETAEMKDIVPLYGKTYHFWQVDRGDPVPMGAPELMASFTSEERVKLACPGGLGELVKERDERFGVDHKVKAEKRKGLEKEGEGVMVGGADGMWED
g514.t1	XP_035352128.1	XP_035352128.1 glyoxylase [Aspergillus tubingensis]	Aspergillus tubingensis	98.4	255	4	0	1	255	1	255	4.40e-188	525	MHVQSIPMWTGKGNNYAYLVTDEPTKESVIIDPANPPEVAPTLQSQINAGKIKLTAIVNTHHHWDHAGGNNEILKTFGQLSVIGGKNCQSVTKTPTHGEVFKIGERISVKALHTPCHTQDSICYFMQDGDEKVVFTGDTLFIGGCGRFFEGTAPEMHKALNETLAALPDDTKVYPGHEYTKGNVKFCLAVSQSEPIKKLEAFANANQETQGKFTIGDEKLHNVFMRVNDPEIQKKTGKTDPVEVMAALREMKNSM
g515.t1	GAQ42621.1	GAQ42621.1 glyoxylase [Aspergillus niger]	Aspergillus niger	88.7	803	64	4	1	777	1	802	0	1346	MADYWQPQSSFANPTWVQGNQSCWRSSTFRDLIHAFPKPKRTGRVTKPRSAGNSPSSAGRRRTATIPYSSPMYQGYQAPVNATLVASALPRTGHNRPTSWHPALEPVSYPAAQYVPATTAMDNFAAIGVCPQPLPTAPATFDHSSMLPSYTPADIPCPDLGFPSLPDAQHQMSLQQSTLLQMNDSQAEPVSWDTNASNLSAMAEPMSDCYSFDMSSMHNNIPPVYVAGSSYESVPSSGCLTGPPTPDFLPIQRPDDDLYLQPLPEKQKPEDELVGMGLYSNPEASLGSSLLGLCGKGLKLEETFTPSSDNEAEDQDDDDDQEDDDDDEEDQDESPVNSKGPDSNPKQPEAETFQQPIKAPGNMMQRSFFFDDDDLEQHAVVIFTPWKEHSQLLAVRSQF…
g516.t1	OJJ77338.1	OJJ77338.1 hypothetical protein ASPBRDRAFT_112062 [Aspergillus brasiliensis CBS 101740]	Aspergillus brasiliensis CBS 101740	99	506	5	0	1	506	1	506	0	993	MAKGEEPLSHRDGHSRGGTDGYSSDTHNQLEVVLQPECSHRRKSSLVMADDPMTRPDLSHADQTTACFVHSLIAGEWGDPTNKVKVLEGVLKGTKDEKEEEALGGEEDDENEIEKEMMQSRHLTKKQLSDMAWNVRKLSKKLDSIKLKLTVKTVFLVTKAGDQSVIGSTREVARWLLSRERDTQYNVYVEKRLETDPEFGAAEILREEPSAKTRLKYWDHELAAERAHLFDFVVTLGGDGTVLFTSWLFQHVVPPVLSFSLGSLGFLTKFDFNEYQKTLSAAFKDGVVVNLRLRFECTIMRSNPLPKGELAPGGKRDLVEELIGEEGDDTLTHRPDKVLQILNDVVLDRGPNPTMSSIELFGDDEHFTTLLADGVCIATPTGSTAYNLAAGGSLSHPDN…
g517.t1	OJJ77339.1	OJJ77339.1 hypothetical protein ASPBRDRAFT_25012 [Aspergillus brasiliensis CBS 101740]	Aspergillus brasiliensis CBS 101740	100	262	0	0	1	262	1	262	4.45e-171	483	MAQPARHAAMLSISNSGPNLPVAASGAAADRQHPAQHIHTQSQSSQGLRVPSNRKTIYDRHLNRSRNAELSRASFAFLFAEMVTYAQRRVTGIQDLERRLNEQGYPLGLRLLDLLFYRTISSSTSSALSSSSSTSSSPPNRPLRILPLLHLIHGPLWRLLFNRPADALEHSVSPETPNEYMITDNDPLVNTYISVPKEMSMLNCAAFVAGIIEGVCDGCGFEAKVTAHNQPTEMWPGRTIFLLRFGESVMEREKVLERAGVK
g518.t1	XP_035352133.1	XP_035352133.1 microfibrillar-associated protein MfaP1 [Aspergillus tubingensis]	Aspergillus niger;Aspergillus tubingensis	87.2	499	58	3	1	497	1	495	1.02e-214	612	MPPPLPSHHRGMTANPVRPSRYRPGKAIAEEPSSSEEEDEAEEEAKKEAERQRQQERRRLEQQRRQAPKASSFPAGAAKIAQGVKDVKIEEEEYEDEEGFVTEDEEEEEVKPAKAAVPVAGDRVPAAAAAPGRTATVKDESEEEEEEEDEEEESSEEESSSEDEAPRRVLLRPTFIKKDKRNNAPTQTQNGQAATGTVVDTSAETEARRIQRQEKADALIREQLEKDAIARSEANRAWDDDELEVGEEGAIDDTDGKDPEAEYAAWKLRELKRIKREREAIEAAEKEREEVERRRNLTAEERDREDREYLAKQEEEKEATRGQSGFMQRYFHKGAFFNEDMEREGLAQRNVMGARFVDDVSRETLPQYMQIRDMTKLGKKGRTRYRDLRTEDTGRFGEG…
g519.t1	OJJ77341.1	OJJ77341.1 hypothetical protein ASPBRDRAFT_50248 [Aspergillus brasiliensis CBS 101740]	Aspergillus brasiliensis CBS 101740	100	122	0	0	1	122	1	122	3.27e-84	251	MSLQTPRILPSHLHAFHPSSAGPRTSHTVRILGTVTALRGDTATMTCGNHGDVTLILKPDSHLQMGKLVEIIGKVADLDNGAGVGIRVLGSTDWGSPADCDYKIYEHVVNATHRLKPIFYDE
g520.t1	OJJ77342.1	OJJ77342.1 hypothetical protein ASPBRDRAFT_114067 [Aspergillus brasiliensis CBS 101740]	Aspergillus brasiliensis CBS 101740	99.7	1170	3	0	1	1170	1	1170	0	2204	MDSQDGISVRPMRLKVLYTFDDANKTNCLARWPHLLDIQTAALDEKTQIGVIELKTCIQAIVSASPELVAKLGQDYTVYAYDYSEYETPLVGQGMLSWVLASASPTPDLPAHQSETMVTGRVCKNVLGLFSKGAQETLEVKLRLVPVPTVMQSEYLDSMQRYRELSNVIPHDFDAQAWTNFLRQNPGLLAPRLQQPDRTASPVDHAGIERFHRLLSEGSTPRELPSIAANGSIRSVSPAQSVLGHASRMSTPGCQLSAQQQEQAQERPHTDIIRPTSSASMRESDLPMHARYASRRGSMQSGYGSGDESSEQQPRKRAKLYRADWPGKSDLNIERQPSSLRVAASTAASVRIHRPTPVNPSIAAAQSSNEEPVRPPTPISNANELPRRARPRPSLLRES…
g521.t1	CAK97221.1	CAK97221.1 unnamed protein product [Aspergillus niger]	Aspergillus niger	98.3	117	2	0	23	139	1	117	6.48e-74	226	MSTDPKIHSRHGVIRSSTCRDLIANLVLQFHRDLLNKPKSELTEYEVSLVEEHELTAGPLSLLQTATRTHTQVLISCRNNRKLLARVKAFDRHCNMVLENVKEMWTEKPKGGNGKGVNKDRFISKMFLRGDSVILVLLS
g522.t1	OJJ77344.1	OJJ77344.1 hypothetical protein ASPBRDRAFT_113100 [Aspergillus brasiliensis CBS 101740]	Aspergillus brasiliensis CBS 101740	99.7	611	2	0	1	611	1	611	0	1197	MKSDLLHKIHWIRCCRIHALTRPSAKHFFSDPTHLVQTALNSLTLTNPSLAYDPENKIVFRRPDTTTKSKVAIVSGGGSGHEPAFAGYVGKGFLDASAAGTIFASPSAEQIRKAVMDCVDHEKGVLIIPMNYTGDVLNFGMATEKARAAGIKTEFFAINDDVGVGKKKGGKVGRRGISGGILILKIVSALAEAGGSLEDVYRTAQLANKNLVSVGSSLEHVHVPGRAPPTDTIPDGEVEVGMGIHNEPGSHREKFELTELVATMLLQLLDHNDPDRAWITRKPDDDFVLLINNLGGVSALELSGITDEVYRQLNRDYNVRPIRVIQGTFLTSLNGLGFSISLMKLVDSGLGEGKSFLELLDAPAEAVGWSAPIRPETWEHRSDAPVELKRTKMPEDQPS…
g523.t1	OJJ77345.1	OJJ77345.1 hypothetical protein ASPBRDRAFT_60945 [Aspergillus brasiliensis CBS 101740]	Aspergillus brasiliensis CBS 101740	100	891	0	0	1	891	1653	2543	0	1714	MQQNSRGTTEQRSGKRKSIGKRKLSDQEEALQPPQQQQANISEFLSRNHTTPARGHHQQTSPTSKRLRLSPPSSDSVPSANSRDRSASDRMYNFANAESRPGAPMGQSASGADLPNTTTIKPRTFNATSRQNNFTPHTGAKRLVVKNLRTGSRLNQESYFEKIWGQLDAALSAIFGGGKPEISLEELYKGAENVCRQGRAAVLAKRLQDRCREHVSGKLRDKLVAKAADGSNVDTLRAVVEAWSQWQSKLVTVRWIFYYLDQSFLLHSKEFPMIREMGLIQFRQHIFSDAVLQPKILQGACDLVEADRGEEQSVVADSLLLRNTIELFHGLDIYTTGFEPLLISESKKYFASWAQREATGYLATFAENSHRLIEREVTRCELFSLNRSTKQMLSELLDR…
g524.t1	OJJ77345.1	OJJ77345.1 hypothetical protein ASPBRDRAFT_60945 [Aspergillus brasiliensis CBS 101740]	Aspergillus brasiliensis CBS 101740	99.8	1654	3	0	1	1654	1	1654	0	3211	MEERDAATGLRGLYQDLSALSASSFVNIERLRIELETHIDDFKKLLDKPPKNNTSRQAVLSGKITVDDLEYSINEEFQQGALMLADALDLDELQAAMLFMAAQEDAHVLDRPPLIAAIMRFHERRQFLLDSLRLIFQESFEVERELTQVLMQEMLAFVVEIKDGPLRNASLFTRKCMKSMEDIEKWLVLLNEQTQKASIVGQSAEYDIVEALEYQRSSLQQQHESLGAVLCYLFKGPYTSSEDLRLLLDHLRKLERFDGLLIHYLPCIIASFVQHGSPESSSSYRDARSLHTAITSSKDVQPWKVPTFHSAVIALWLAVYSGWDFDGPASPLQGVDLEKDSEERTKMFMTALDDGGLELILAVCYGVNNEEWADPARSELVTLLLKESASANLETDCCS…
g525.t1	OJJ77346.1	OJJ77346.1 hypothetical protein ASPBRDRAFT_50256 [Aspergillus brasiliensis CBS 101740]	Aspergillus brasiliensis CBS 101740	94.8	2901	16	1	1	2765	1	2901	0	5288	MGDITLDGAIALLGSEKLRERSDGLADLKHILLKNRRNSKLNSLNDKACHKIFESLFRFVSVEKSLYNRSHSKGASATRLSSCASVLRTAVDVFLRNLRTKSVRAIIDHITDTLLGRGSDSLFEVLSVDYAKCLATLLRHPPHLEHLALIEWEKVVDFCLKSISAHTDQEDLTIRERPSSFLDGYISTGGRTSTPARSTPMPTASEKPKGDTNAATEAVVCIQLLVGSPSAPIQDAAERILNGLTKFVGSSTIAGSGHQAAFASVNTVVMKILFDQSEIARSSLLDLMPAIRRFWATKLLGLKDEMLVTVMLCAVVLTDAARRDPSELITRAIEDLLETLYTEYAKRSEKEILQLDELILHHSGSEEHQTCSAWPRFESARSEHNWTTLWVIAKLLELS…
g526.t1	OJJ77347.1	OJJ77347.1 hypothetical protein ASPBRDRAFT_113700 [Aspergillus brasiliensis CBS 101740]	Aspergillus brasiliensis CBS 101740	96.4	523	3	2	1	521	1	509	0	941	MSASAPNRGLVVFSGGSAANNLVDVFNAVRGSKQCSLSYIIPISDNGGSSSELIRIFGGPGIGDVRSRLVRLIPESPPNSERAAIKALFNHRLPADASLAHAEWLSIVDGTSILWAAITPAKRELIRSFFNLLNLEILKRARPPTSTFDFTSASVGNLFLTGARLFSGSFESAIYLLGSIGGVPWDLVRVIPAINSNFSHHISASLANGTIIVGQNSISHPCEAIPLRSPRPLLADGTENSHHNHFQFSSLSSSSTPTPTPYFEDDDHPPGFLPTLRHKNISFSKSDTQDLPSRISRIWYINPYGQEIQPPANPRVIESLYDAQAIIYSIGSLYTSIIPSIILRGVGQAIATGPARHKILILNGSLDRETGPSHEPFTAADFVEAITRAGEESRGRGPL…
g527.t1	OJJ77348.1	OJJ77348.1 hypothetical protein ASPBRDRAFT_113949 [Aspergillus brasiliensis CBS 101740]	Aspergillus brasiliensis CBS 101740	99.7	1135	3	0	1	1135	1	1135	0	2288	MLWGHPCIPYRRDVLRFCSQRLRSPRIVRPQSPSLLARYLATQSTARTPDEAPKRESLAVPASARFNEIGVQQLSDHVYSQVFLQKSDPPDPGLVALSKEHLSRHDLLGKSQDAAEPIAFDMPALQGQSLDEHFYKLGMDASEPYLAYAKQYTMVNSPEKPRKWIKRSGWTKYNSDGTWEAVDAPNEAMLTFDTEVMYKEHSFAVMACAVSPTAWYAWISPWLLGESENQVQLVPLGDPSKPRIVVGHNIGYDRARVLEEYDMAQSCNFFVDTMSLHVAVNGMCSQQRPTWMRHKKNRDLRNKIATESNSVELAALLESKMLSDEEEELWVGRSSVNSLRDVAKFHCDVTIDKAQRDYFGEFDRAGILGKLEELLDYCAADVAITHRVYKKVFPNFLEV…
g528.t1	OJJ77350.1	OJJ77350.1 hypothetical protein ASPBRDRAFT_236207 [Aspergillus brasiliensis CBS 101740]	Aspergillus brasiliensis CBS 101740	99.8	632	1	0	1	632	1	632	0	1209	MSIYSHDHAQSAAGLQSSQDIADIEANPRTPNPPISPTTKVPPSPPPETFTTAARLNSRETVRNRLRRSTTARSYYREDAAHDPNWQPGTEPGIDPSQPLPAYSTEWMASTPTELHGTSEVTVVDFSQNEMRQYVLDNDTLEPFLAREREPWVQCRWINVNGLSWDAIRILGNHKGLHRLAIEDLINATNRTKVDWYSDHAYIVLKLQKLIKLKEEDSESEDEEDENAPWSNERKSSASSISLRRPTKRNLVLEALKDLFRPKTREDSADEQTPGKDAPSGRGNSTSKVSDPDNGSNVRFTPRSIQRYRGGPNEDRIAFMERHAILAAKGLCVTLEQVSIFLHADNTVTSFFETSADDVEGPIVRRLSTPETMLRQSCDASMVVQAILDAIIDLAIPVT…
g529.t1	OJJ77351.1	OJJ77351.1 hypothetical protein ASPBRDRAFT_190662 [Aspergillus brasiliensis CBS 101740]	Aspergillus brasiliensis CBS 101740	95.7	668	27	2	525	1191	42	708	0	1247	MDAVNRTFNNASNALWSELHPNQTPDSQYSSQQHGDEPLSGIQGRGTATDPYDAGNRDEQPGAPRTKKNTAVIPESLASTDADHARNPKSPSNADFGPKNVFVNEPYQGQQMSYPTRGASSGTKQWQSQAAVPEQRNRTSTYGQGSNTSGLGSNTSGMGSQYTQKGRDTAGSSSATSGAYAYSGQGVRDTTAVRDNTSATRDQGVSGKSNISGPTGAHAYSGQEVQDSMDARDEVRVPTSINKGTTNQRASSTGQFAQQMPDKAASKSMQKENEYGSTAVAGGVAGGVIGQQGFKNNLGQEAVQSVTDDNAGTRSLQKDMASPSSAIAGGSVGKQGASGNIDQARDAQQEKLSAAKSTPSATDSTPSGVDAVNARSQVPNKESRVYQDKSTQDETAGVV…
g530.t1	GAT19150.1	GAT19150.1 GTP binding protein [Aspergillus luchuensis]	Aspergillus luchuensis	97.9	679	14	0	1	679	1	679	0	1295	MADTEDAGTSSVSEPLDLVRLSLDEIVFVKLRGDRELKGRLHAYDSHCNLVLGDVEETIYVVEEDENEQEILRALSEFAEYAEKQQAQRSAQYLPSDSGYETASAAPVHEDHAELDILDQLDLTDAPKSIKLKELLLGTGEQPDHDLQVLANILQTRIDEGHGETLFDLGLEDGGESMSFDLSQWNTALQRLREAAETLPAHCRILVTYNVGGPEESRVKHERIKDSWGKLLIRQPAGTVEEMAEIRMAVVGNVDAGKSTMLGVLVKGNLDDGRGKARLNLFRHKHEIESGRTSSVGMEIMGFDSRGDIVSSAHGRKMSWEDIGRRSAKVIAFSDLAGHERYLRTTVFGMLSSSPNYCLLMVAANNGLIGMSKEHLGIAVALHVPVMVIVTKIDICPPQ…
g531.t1	OJJ77355.1	OJJ77355.1 hypothetical protein ASPBRDRAFT_112654 [Aspergillus brasiliensis CBS 101740]	Aspergillus brasiliensis CBS 101740	97.1	687	3	1	1	670	1	687	0	1338	MLGFIRAGESLGSHLVEVKVDLGDHETSKAHDDIGAGPQVESLDDLERNFNAIIRDGQPDQVMDAMLDPRFESFVCLMPPSTFVEVFHLLSPAYFIDPYREIHRPIHPSAVDVKQYRSLDSIFDEFANNLSAILQIRWAGGQPLGLAEYTHLLDCARSMGDAIMADYIWHTIREDGMVPDSQCYNYYMEAKVWDKAYTGLEKYRLRMTPYLYRKRRFFEPNPGWQGYGTAARSVRKEVLQIFNEMTQEGTSGDTTTFVNVILASSRVGHMQGIKNVLHTVWNIDVDALLEQVEESMLPEVTPYDRSSPLYPTSHLLFAVAHAFGTNNDIPAALRTIDFISSRYDIPVPENVWLELFERSFVLSRPRFGPDAERNAKGQVTYDFLNTMFETMTVEPFNVR…
g532.t1	OJJ77356.1	OJJ77356.1 hypothetical protein ASPBRDRAFT_36580 [Aspergillus brasiliensis CBS 101740]	Aspergillus brasiliensis CBS 101740	99.3	303	2	0	1	303	1	303	3.41e-216	600	MTPSTLLSLGSAILAVFLFWTLSSTTSSPFGGAFPRLYNKRICLLIAHPDDEAMFFAPTVLALTRPEYGNHLKILCLSSGDADGLGHIRKKELVKSAMQLGLRQESDVYIIDDPSRFRDSMSIQWTESDVSAVLEHAFAPELSDNTTTNSKKNKSNKAGSAPTATIDVLLTFDKGGISNHPNHRSLYHGAVHFLRTLMKDKPGYTCPVTLYTLTTTNLLRKYAGILDAPFTMLRGAMNSLLGRSGGSKGQLPSRLLFVSSVNEWLTAQSAMVKAHQSQMVWFRWGWITIGRYMVVNDLKAEKI
g533.t1	OJJ77359.1	OJJ77359.1 hypothetical protein ASPBRDRAFT_112675 [Aspergillus brasiliensis CBS 101740]	Aspergillus brasiliensis CBS 101740	99.8	534	1	0	1	534	1	534	0	1033	MPGRLLSSFVRPSLSHHSHHSHHSSVSHSNSSSSSSVNEIPPNAMVSKKPSTHGAERARSPERRLSFAVEHLIHPHRDHSKDKRRNHGRSSRSKERAGQEEIASAHAKLDVIVESPPLVCYGSPANSTGALFSGRLKITISDLAGMVTLDTFDMRLMSRLTTKKPVSRDCANCASRTEELTHWNFLTEPIHLKNGDHEFPFSYLFPGHLPASCNGSLGQVEYFLSARAHNINGEEYTYKMPVHIKRAILPGNDKSSIRIFPPTNLTGRIVLPSVVHPIGTFPVQMTLSGIVDKGEETQTRWRLRKMMWRIEEHQKIVSTACTKHAHKIGGEGKGVLHQETRIIGHNEEKEGWKTDFDTAGGEISMQFEANINPSCNPVCDLETPGGLEARHNLVIELIV…
g534.t1	OJJ77360.1	OJJ77360.1 hypothetical protein ASPBRDRAFT_190669 [Aspergillus brasiliensis CBS 101740]	Aspergillus brasiliensis CBS 101740	98.8	489	6	0	1	489	1	489	0	964	MSSSTVQTVVSVPQPAKCASGPPSPGEATLAEQTIINGLSEKLEASHYHAGNDPWDLEAQEQKVKKLSRIRYGLLNIYRRLFTLVFLANIGVFVAIMVTDRKLIALVNATAGNLMACGLARQPLVVNSIFISVCSIPRTAPMWLRLLAAKAYHYGGVHSGCGVAAFVWYVGFVGVMSREYWTGASVLSLAPVILAYVILVLLLAIIIVAHPKFRFKRHDYFELTHRFSGWLVVALFVILLMIFADQAREAYHESMGRFLVTLPAFWFLMVTVVAIIHPWVFLRKVPVRAEYLSSHAVRLHFTHTTTAFGKGIQLSRHPLRDWHGFATFPDPEGKSFSALVSKAGDWTTACIQDPPTHLWKRGVLINGFAYAMRVFKRVVVVTTGSGIGPCLSFLGDANR…
g535.t1	OJJ77361.1	OJJ77361.1 hypothetical protein ASPBRDRAFT_190670 [Aspergillus brasiliensis CBS 101740]	Aspergillus brasiliensis CBS 101740	99.7	603	2	0	1	603	1	603	0	1201	MGSLWAAPNLGDPFNLPLPNTHSTTHGEGCYTDLLSFAFRGPVHYDRQQPLFIDAEDTTRFFNALQFETLVRTLIAGLKAHHVQPGDCVLVHLGNSIIYPALFFSIIGAGGVFMGSNARSQPQELDHILHLAEPKLIITSSDALPTVLSVSADHGMHPSQVCLVDEAAGDYIAQYFLAGPLAYATAGMPFLLVPSSGGGSVVNFAHLLAYGESDWVAFDDETIAKSTPAAMFSTSGTGGLPKAAYLTHHAMVSHHLTIHYEVPYEVTRLMSLPMFHMFGALWTHLFPIRYGQPLFVLSRFELTQFITTVRDYGITETYMVPAMIHTFNRSAAPLAGSLSSLRYVGVAGAPIDAAAMQRFRELLHSDARASQLWGMTEVGVVFQNRYGPQESPAGSIGRL…
g536.t1	GCB19048.1	GCB19048.1 hypothetical protein AAWM_01933 [Aspergillus awamori]	Aspergillus awamori	92.4	304	19	2	1	304	1	300	3.91e-185	521	MEGSRNRKQRRAAAAAAAAATTVDSDTFDPSSIPLARPAPNPPKSKEKTLMEIISERQSELLGQANAPTGASDSSPRFVTIDPATGEISGLNASELAAVKNGQDIRRVEEVTDEADSTQEEGKDESEESDHPIPPVIDTLLLSVPLTTLHLTLAYLAAHQYAESIELDPLVRESVFVAFPMLTLLVHLAHGHVVSFIGSTGRSKSTEGVSLLPWDSEKMSLEFVRKLLFPPALRTMVFLPMAVALGCKLMVITNDEPYYAVMRGAPAIGTIWIWSVLEIPFGAAVIGALGPLAWGVWWKGYGIL
g537.t1	OJJ77363.1	OJJ77363.1 hypothetical protein ASPBRDRAFT_237071 [Aspergillus brasiliensis CBS 101740]	Aspergillus brasiliensis CBS 101740	99.8	489	1	0	1	489	12	500	0	905	MGSLPLTLAYPRLNIPRQVGNATGVAPGTAPGNATAPATAPATAPATAPATAPATAPATVAPPPVVTFSTSQAHTPFTGVPTTTGALTLGPIGPGISPLGIPPEATTYPSDGQLHSPEPGPFIPAGGVGTNGTTPVYNAKSDFDYESLALALYQEYIELDLFHDGLARFSAEDFTAAGLTAEDRFLIEFMADQEVGHATMLTNILGAEAPRQCNYVYPYTTVHEFLDFCQKLTRFGEAGVYGFLSHLDSREAAALLTLSITTEARQQMIFRQFEGLFPMPVWFEVGVPQSWAWTLLAPYIASCPEGQTRLAWQNFPALSILNQPNPVRINGADAWRETITNGTNVLNSTAVPSSQACLNNNTPGINCSPAITHNRTNPLSFPGREVFLSWDAPGKPVGP…
g538.t1	OJJ77364.1	OJJ77364.1 hypothetical protein ASPBRDRAFT_236822 [Aspergillus brasiliensis CBS 101740]	Aspergillus brasiliensis CBS 101740	97.3	300	2	1	1	300	1	294	5.02e-206	574	MSHFNAAQLLSVEGLVVVLTGGGTGLGRSTALALAENGAAKVFILGRREEVLQETVSLSKKDTIIPVRADITSKESLQAAYDIVAAQTDHVDLLIANSGYGGLPMSPPKPRPDGSIPSLSEFRDHLWSSPEEDFGKLIDINVKGTFFTVVAFLPLLNAANERRPTPVKDQPPTPTAQVIIVGSVAGHFRVVPYSIAYNISKGAVHHLIKMLSTIFTPYDIRVNGIAPGLFPSEMTKTAFGITKASASDGAFPKSELPPGRAGRHEEFAGLVLWMASPSGAYANGNITVIDGGWLNTLPNC
g539.t1	OJJ77365.1	OJJ77365.1 hypothetical protein ASPBRDRAFT_112617 [Aspergillus brasiliensis CBS 101740]	Aspergillus brasiliensis CBS 101740	99.7	350	1	0	1	350	1	350	1.87e-264	726	MEGNLPQQQCHPASTAVEKDDLVIPIIDFGPFLNGTPADKHEVAMSIVDAFKTSGFLYLKDHGIPPSVVSRVFGSSGRFFSRSQDQKDGLCWTTPQSNRGYVKTGQEKLSTVDDAAGASRTTPDLKETMEIGREGVDGFPNRWPDHIDDEGKDFKEVMLSFFDMCKSLHTEVMRAIALGMHLPEHFFDAYVDAGDNNLRLLHYPSVPKEVFKQNPGQVRAGEHSDYGSITLLFQDRRGGLQVRSPKGTFVDVTPIADTVVVNAGDLLARWSNDIIKSTRHRVVEPPAAIGEEENDSTIYPDRYSIAYFCNPNMNQFIEAIPGTYEEETRPAKYPGITTGDYLVQRLTATI
g540.t1	OJJ77366.1	OJJ77366.1 hypothetical protein ASPBRDRAFT_190675 [Aspergillus brasiliensis CBS 101740]	Aspergillus brasiliensis CBS 101740	99.7	383	1	0	1	383	1	383	1.60e-284	780	MPPLIVDIHTHVYPPSYMHMLRARKTVPYVHDPANNATPRLIILSSDDDPSIPVDQRGRPVDSSYSDINVKLAFMRRHGINCSVISLANPWLDFLEPDEAQTWAERINDDLEATCARVNNDADPDKTKALHEKETLFAFGALPLSAPSADIVVNEIRRLKTLPHLRGVIMGTTGLGRGLDDSRLDPVWEALQDTESMLFLHPHYGLPDEAFGGPEVTNRYGHVLPLALGFPLETTIAVTRMLLAGVFDRFPRLKILLAHSGGTLPFLAGRIESCILHERKFIANGGDVPGPQRSVWDVLNTNIYLDAVVYGTAGLKAAVTAAGGSDRLLFGTDHPFFPPLGKDDEEWPSVTTNYKAIHTAFESEGDAAAGVLGGNAARILNLK
g541.t1	OJJ77368.1	OJJ77368.1 hypothetical protein ASPBRDRAFT_190677 [Aspergillus brasiliensis CBS 101740]	Aspergillus brasiliensis CBS 101740	98.4	436	7	0	1	436	1	436	3.66e-262	728	MASKDDLKAHAASNEDFYALLDISPAAAESEIRRAYRRTALKYHPDKIANPTPADIDKFHLLQIAYDVLSDPSVRQLYDNAREARQRKQRERDMMDATKRKMREDLEARERAGAAAMGGAGAQRGVKRPWMGSGTEDDAEAKLQREIERIAEDGRRRRREAEERLKQEMEEEEKLMRQEEEEAQRAADRSSQKVDRSKEGGTNVPELERGVKVRWVREGRGLDLDKDRLTSLFASYGKIENILLLKDKRQRLGDNREKKTVATGVVIFASIVSAHAAVLDGEKKVRQSVGQADSDWSAVESVFWASGSQPDLGAESNGYSSASTPSQQGINSGPVPSTAPPKPSFNFAGLKSAAPDAAGKNPGKAPSFGSFAAGAAAKSAKPAPAGSANGSSAPSMEEL…
g542.t1	OJJ77369.1	OJJ77369.1 hypothetical protein ASPBRDRAFT_112391 [Aspergillus brasiliensis CBS 101740]	Aspergillus brasiliensis CBS 101740	98	445	9	0	1	445	817	1261	3.60e-304	866	MMRSSPSTRTICAQCLSRNRYFSTTIQRCAPRSSTPNPPSPPATGYARLTNRGLISITGIDSTSYLQGLITQNMLVTNDPNRPTRRTGSYTAFLNSQGRVLNDAFLYPLPQAEGTSPDEHAWLVEVDKSELTSLLKHLKKHKLRAKLKLRALDEGERTVWASWKDHSEPRWAAYNLDSQTFSPFASSSSSVTGCVDTRAPGFGSRLVTPGEGDLRTHLAEAEGHDYGSEVDLGSYTVRRMLHGIAEGQSEIIRESALPLESNMDMMRGIDFRKGCYVGQELTIRTHHTGVVRKRILPVQLYDGSLGDLGSAADDMPVYDPSVEVELPPSGSNISKVSARKGRSAGKFLGGVGNIGLALCRLEMMTDVALTGEGTQYSPDQEFKISWTGAEDGSSESGEV…
g543.t1	OJJ77369.1	OJJ77369.1 hypothetical protein ASPBRDRAFT_112391 [Aspergillus brasiliensis CBS 101740]	Aspergillus brasiliensis CBS 101740	97.1	818	18	2	1	815	1	815	0	1471	MTETKMQLEDWLDDLCVRFIINLPREELESVERICFQVEEAQWFYEDFIRPLDPALPSLSLKAFALRIFQHCPLMSQWSHYHHITAFSEFLAYKTRVPVRGAIMLNHDMDEVVLVKGWKKGANWSFPRGKINKDEKDIDCAIREVYEETGFDVREAGLVQDEKDVKFIEITMREQHMRLYVFRGVPQDAHFEPRTRKEISKIEWYKLSELPTLKKSKQQDQGFVVANANKFYMVAPFMHPLKKWIAQQKRLEGKTPGGPKLPMPNDMSIDEASHAMHSFTPNQVAAEMATPSDLPEVASTQDASAHLKRLLNINNLVPSENPSPVMHAQVSGPNASKSNALLELLRTGSSRESLPQAHVPEQQSTPATLPGSMPSVSRPYPAVGFFPGFPQQGPHVGVP…
g544.t1	XP_026630806.1	XP_026630806.1 hypothetical protein BDQ94DRAFT_69924 [Aspergillus welwitschiae]	Aspergillus awamori;Aspergillus welwitschiae	94.3	262	15	0	1	262	1	262	5.07e-159	452	MSAQLASLVSKKILAESARNHFGQEDPYFEEVPASRLNRAFGKKTQKRRKAVPPGLSQNDSKVLTQVKRRAYRLDLCLFSLCGIRFGWGSVIGLFPFIGDGADAALALMVVHTCDKIDGGLPSRLRMMMLMNIVIDFFIGLVPFIGDVADALYKCNTRNAVLLEKHLREKGAKALSKQERRQNTTDMSLPDEFDRYDDDTSGEPSINKGQTHSRNTDGPTKPQAARQSKKNRSQGRWFGGRAEPEDDLERGVIDNSQSSRRPR
g545.t1	OJJ77371.1	OJJ77371.1 hypothetical protein ASPBRDRAFT_25040 [Aspergillus brasiliensis CBS 101740]	Aspergillus brasiliensis CBS 101740	99.5	366	2	0	1	366	1	366	4.12e-267	734	MPGKELPDRCMNCHEAEPAFTLRERRVCQECYIRFLNFKPFKRMERYRLRRNMPQTGPCKLVLPLSYGVSSTVLLHMLHRQLEVLRTKKHGPAGFEILVLVIEPSTISPVPPHDEGFALAQQTFPLCSFTRLPFHSIFELDPDVHQIMSQYAGENFTDDTTLSNEERLNRFRSSISTATSKSDVDQILLNKLVVAFAKKMECRGIVWGDSDSKLAAKTLANVAKGRGSAVTWQVCDGMSPFGLEFNFPLRDVFTAEIRTYATLFPELAGIIVHDEPPSENTLTKNLSIDELMIRYVSTQGEKYPGVMLNVTRTASKLQSSGTSIGGLQCDFCGAFMTTSENLMGEQSNEQLQFCYACARSQPGLSC
g546.t1	OJJ77372.1	OJJ77372.1 hypothetical protein ASPBRDRAFT_36601 [Aspergillus brasiliensis CBS 101740]	Aspergillus brasiliensis CBS 101740	100	499	0	0	1	499	38	536	0	992	MYSRKAWGGNVDPFILTKFVQEPQSGDSDPLVSLVIFEWSDENLIGRPVPGDSGERETICDEASVQANLCSEDQVGSFILASNVTEASQFPVVTKAVHLNDPAAINYPIKKTGFYCVSTYGYSGVDYKAVVEFRNSYGELPAAQIAKLPFYGGLTIVYAVVGLFWAFLYVQNRHDILPVQNYITAILVFLIVEQLMTWGFYDYQNRNGLNTGAKALMVIVAVLNAGRNAFSFFLLLIVCMGYGVVKPSLGRTMIYVRILAITHFIFAVIYAVASLSITPDSAGPLVLLIVLPLAGTLTAFYVWTLNSLNATMKDLIDRKQKTKALMYKKLWWCILGSIVVIFGFFFINSIAFAGRSEASFVPEHWKSRWFVLDGWLNLVYFFDIGFVAYLWRPTANNRR…
g547.t1	OJJ77373.1	OJJ77373.1 hypothetical protein ASPBRDRAFT_113522 [Aspergillus brasiliensis CBS 101740]	Aspergillus brasiliensis CBS 101740	96.6	526	16	1	1	524	1	526	0	968	MAHPENQTADPTSSNDISPFQIGQELSTSLLARCRSLLSEISDFQSLLVETQRNPQVVEVRSLKSNVLSELRTLEKLDARVQKLVDAGKGDGDNADEDRSADDETAARRLVHTLKSSNLPFYEAVWAIAKNTCRGLVAFGKRFYWGDDGGGGASGKKSGMDKKKSVFVDIIADDGEEWVKVSTVAESRLLFEMAEKGWEAGSESDEEGEARTVLRNHDDEEDDEDEDEIELVKLAKDLRCAADATRVRYRHPRLRFVAPRIHEGSCAEIDDLVKIIRGYGIEVVCGEKAYAVTSAQEGLSHLLPKPFKHFTSTINVDCTLMLAAVSDLSHYKHITQSPQHHKAINRQIAVEHERPLLPTELWPAMDAHELLCVEEAATRMKEIVNIIGTDTERLRMEIL…
g548.t1	OJJ77374.1	OJJ77374.1 hypothetical protein ASPBRDRAFT_111824 [Aspergillus brasiliensis CBS 101740]	Aspergillus brasiliensis CBS 101740	99.7	370	1	0	1	370	1	370	2.23e-273	750	MAEGQPQPAAQPQPQQPILQCQKVSDIIRSFRPTKAFRGPKQDTSNYVTSLDFDDQGDYLVASGDDETIQVFDIKEGKSTKSVPSKKYGAHLARFTHHSRQVLHASTKVDDSLRLLDLHNEGYIRYFQGHTDKVTSLALSPGSDSFISCSKDDTVAIWDLGSRNAQGKLKLATPYLVAFDPSASVIAIASQSTASVLLYDLRNYDKAPFSSFDLAPYEERYTPSTRGRGWTRLEFSNDGKHLLVGTDYHGHFILDAFEGAVKAFLVGKAGSPGRAAPVSTTGKPLGQGDACFSPDGRYVIGGSGDHSDMLVWDLQQSPPEPNGLLQPMTRLSHRGRTAIVEYNPRYNMIASADKETVFWLPEDPSRSSEK
g549.t1	TPR07600.1	TPR07600.1 hypothetical protein CAN33_0028385 [Aspergillus niger]	Aspergillus niger	87.4	341	36	1	80	413	66	406	9.28e-203	575	MDFDAFDRLWRTDIVPVRRLSSAVELPIGRGRRLWTENHPTFPTVPSLSLTSPPPGALSIASRNSQVVLIPPALLSASLLPFARADSVHSPPLAETNLKKYNVHNNRSPSLIRSAADQSSPAVSPDSNLYLYESLQLQGELQSKKDAAKKYRGVLHGVKVILQNEGPRGLFRGIGSAYIYQVLLNGCRLGFYEPLRKGLTTTIYQDPQVQSLGINVFAGAVSGIIGAAAGSPFFLVKTRLQSFSPFLPVGTQHNYKNSFDGLRKIYTSEGVRGLYRGVGAAMVRTGFGSSVQLPTYFFAKRRLMKHMGMEDGPGLHLASSTASGFVVCCVMHPPDTIMSRMYNQTGNLYKGVFDCLFKTIKTEGVLAIYKGYFAHLARILPHTILTLSLAEQTNKIMRR…
g550.t1	OJJ77376.1	OJJ77376.1 hypothetical protein ASPBRDRAFT_36605 [Aspergillus brasiliensis CBS 101740]	Aspergillus brasiliensis CBS 101740	100	396	0	0	1	396	1	396	1.36e-278	766	MSVQLTPSKQAASSLENLKMSDSPVKKLNFGGKENAPAAVDVTADKPVEKPVEAPKVAPGIKEMEANEPLLQENPHRFVLFPIKYHEIWQMYKKAEASFWTAEEIDLSKDLHDWHNRLNDDERYFVSHVLAFFAASDGIVNENLVERFSGEVQIPEARCFYGFQIMMENIHSETYSLLIDTYIKEPKQRTYLFDAIDTIPCIAKKADWAIKWIQDRESTFAQRLVAFAAVEGIFFSGSFASIFWLKKRGLMPGLTFSNELISRDEGLHTDFACLLFSHLNNRPSKQVVEDIIVEAVGIEQEFLTEALPVGLLGMNSKLMCQYIEFVADRLLVALGNKKYYNATNPFDFMESISLAGKTNFFEKRVGDYQKAGVMASTKKEEEVKTNGNGLSFDEDF
g551.t1	OJJ77377.1	OJJ77377.1 hypothetical protein ASPBRDRAFT_202368 [Aspergillus brasiliensis CBS 101740]	Aspergillus brasiliensis CBS 101740	86.4	147	15	2	1	145	1	144	3.20e-71	222	MPYLATSQSYLEQSSLLLQAYPDARITTKYTFPRTTPTSSTSTKQQQSTTQSPEAAETDPKPRIATLELKTYHPGSGICLKYRTNKGAEVGRLITSLGKLAAGADVEGLGLSNPTASAPAGDVEMGDAPAAIAEGQTVGGGESNAGGGAAAGKGGKGKKKGGKGKR
g552.t1	OJJ77378.1	OJJ77378.1 hypothetical protein ASPBRDRAFT_50281 [Aspergillus brasiliensis CBS 101740]	Aspergillus brasiliensis CBS 101740	99.4	933	6	0	1	933	1	933	0	1691	MAEGLRDERDGPSRASTVPAIITTNASSSSIIHHDLSTSASNSPTIFNRGDHSPNSPNPGLLRSSQSFPIGSASDVTAASNGYHQHARKDSRTLPAASNGSVKNLASSPTFAQSTADSSAIDPLSQHIIKRTNTQKTIPLKLLGRASTEAELGGSDPRASLDHGSARGETAMHTKPSKEKKKGVSFLSRIIPGKKKDQFPDDEDDVSEPETSRMDPDAAAQPIGFVPRFPPPPKYIRVRAHYKKERTFNRVFLAQELDGADDSASVSDHDAISTAGPQNEKYTGKAVWALVFSNDGRYMAAAGQDRKVRVWQVVASPEDRGPSDPGSDDDAPPRLNAQVFKPQPIQVYEGHTGSILDLSWSKNNFLLSSSMDKTVRLWHVSRPECLCCFQHSDFVTSIQ…
g553.t1	EHA28056.1	EHA28056.1 hypothetical protein ASPNIDRAFT_41995 [Aspergillus niger ATCC 1015]	Aspergillus niger;Aspergillus niger ATCC 1015	93.3	534	22	1	1	520	1	534	0	980	MGLVAETRQAIRDSPRGVFNWYLLMNIAIFALAGISRGFDEANIASLVVQNRFRIKFGLDQQSPDEYANTKGWIVSMFTAGMTLGCLLCLPFNDRIGRRWTMRLCTLVYVSGVLGQGLCNGNLSGLYASRLIAGLGVAPKTIRGLLAVQFAACQQLGVVFGFFINYGISKNYDGTDMQWMFPTLIQLLPAAVWGLGLLICEESPRWLLYVGRRTQAVSVLAKLRHLPSSHPTVVAEIAVMEFQILQEREAVTGTSQWCLVKETFVPVENRRRFCLVMLSHMFSQWSGGNAITQYLPTILGYLGTSGDALSLTTGVYAVVKFTALLIFSLVVVDFVGRRRSLMAGITLQILTLSYLACYLGISRQMSTTTILHTASATRASTAAIAAIFVHGVGWVIGWF…
g554.t1	OJJ77381.1	OJJ77381.1 hypothetical protein ASPBRDRAFT_50283 [Aspergillus brasiliensis CBS 101740]	Aspergillus brasiliensis CBS 101740	86.6	194	25	1	1	193	1	194	1.95e-106	313	MSPPNPQTNPPPPPPPPSDPLTKVSPIIRNLRLAPPRPLNTSPPPPPPSTTTARTGPYFLYGTLMDPSMLKDILSLNLQQEVHLRPGYITGYVCKLWGQYPAVVPDIHNASSLSSIVKGLVYRVESAEDGVKLANYETGWYRARPCEVVYTDGKVPEREMGHVFVFVGDEAELSEGVFDLGVWLGRMGRMKRK
g555.t1	OJJ77382.1	OJJ77382.1 hypothetical protein ASPBRDRAFT_190690 [Aspergillus brasiliensis CBS 101740]	Aspergillus brasiliensis CBS 101740	97.8	232	5	0	1	232	1	232	1.85e-164	463	MSGLTIHHLRLSQSERITWLCEELEIPYTLKCYNRQQPTLQAPDDYRKLHWSGTAPIIEDNRVVLGETMAIIEYILTKYGQGRLVLTPDHPNYADYVFWLHRAQGSTMPSFMGMLFSRIRGGKQSSDNEEEEEDFVYKMSLSRVKATCEAMDQHLAKNTYLAGEEFTAADCVTVFQLTTLRLFIPYSLDEYPHIVRYLERIGQRPAYKRAMQKGDPDLVPLLAASAPAKSLL
g556.t1	OJJ77383.1	OJJ77383.1 hypothetical protein ASPBRDRAFT_36616 [Aspergillus brasiliensis CBS 101740]	Aspergillus brasiliensis CBS 101740	96.7	300	10	0	1	300	1	300	2.22e-215	598	MNAVLITGATGKQGGSLIRTLISRKSPLEILAVTRDPSSASAQRLKQLSSNVKLVEGNLDNPADIFRNARAQTSSPIWGVFSVQVAIGSNIDEEAQGKKLVDEALKQNVKYFVYSSVDRGGERSWDNPTDVPHFLRKHHIEHHLVEKAKGTGMDWVILRPVAFMDNMVPGFLGKVFATSWKIALKGKPLQVIAVSDIGHFGAEAFLNPDEYKGRAISLAGDDLTFDQFAQVFQQKTGQRIPMTFQFLCFLILAFVKDFGYMYRWFHDEGFQVDIAELRKKHPGLKDFGDWLEQESDFVKR
g557.t1	OJJ77384.1	OJJ77384.1 hypothetical protein ASPBRDRAFT_190692 [Aspergillus brasiliensis CBS 101740]	Aspergillus brasiliensis CBS 101740	95.8	355	15	0	1	355	1	355	4.05e-257	708	MTVSETSAIPHGLWVLVTGANSLVGSNVADRLLSRGYRVRGIVRNAQRHQWLRDLFHGKYGKDTFELVQVQDIQRPGAFDEAIKGVSGVAHVVTIFAGPNDGPNEVFDSIKQLDHNILASAAAEPSVKRFVYTSSCQAANTMGLDDLDGKTVITSESWNETAIERAKTGSPAEWRRGFDIYSASKALGEQGVWKWVKEHKPGFVANTVLPSLCYGASLDPENQGFPSTILWPAAIIRNEWASVSDHVKSCLPDGGYCVGIQDAALLHVAALTNPTVQNERLFAYGWPFFWNDLATIYRNIFPNRELPTDLPVRDRDADLLVVKPSKRSEDLLKEMGKPGWSSLKEIIVANAYGLV
g558.t1	OJJ77385.1	OJJ77385.1 hypothetical protein ASPBRDRAFT_190693 [Aspergillus brasiliensis CBS 101740]	Aspergillus brasiliensis CBS 101740	94.3	707	21	3	1	689	1	706	0	1300	MSDTVPELRFRSGNVPTRYFKACRWCRKQKMRCDARNQVPCARCRAVGRDCVLDPVESARRQNTARRSSPATRPVRMITGDNEQDLRGPKLTGSGVPLHENRKPTAAADLSSPGTAERHAPEPQQLSPNDMIAPVSVMHSMSVNLLGSSSIFMDSSSKADPKSDIIARGIVSEERARVMYDRFMGGSKNFLALFDPIRDTFDSIRSRSLFCFSVIIYLASRAVMDLRSDTHLQRVLQDEAQRLAEDSFFERPTKVETVQGMILLAAYSEKTWFSTALILRTALDSGLEKSLDALLSQENVPRSSLSASMEDRKLVWQTRTWLISFTLELDVASGTGRKSRIGAVDTMKLRKFLEYPLSLPCDMRTISIIEIHQLRSQSRMSIENAKTVDEIVFVELPAV…
g559.t1	OJJ77386.1	OJJ77386.1 hypothetical protein ASPBRDRAFT_50287 [Aspergillus brasiliensis CBS 101740]	Aspergillus brasiliensis CBS 101740	94.6	522	6	2	1	521	37	537	0	967	MWADEGYRFTRLTEDQVLVDFAHDSAKDPVNWTHVRDTPDKFWTIKLTATICDNQGKKMYTVLTALFLVLNSGIASALPSNVVPDIMREFNVTGSPQKVLPTAVFLIGYVVGPLLFSPLSETIGRRPVLLYSFTVFLLGTIACAFAPNWPAMLVFRFICGAMGAAPQTVVGGVYADVFQTPRVRGRAMAFYMAASSFGPIIGPIISGCSAQYGWRWSFRIDLILVGCSWLSSIFLPETFSRAIVKKHVAMLNKQSTTPKYISQRELQSAAVQCTLKETLTRPITMMFTEPIILFTGIYLAFAYGLIFFCFQAYPIIFEGTYGFNVKQTSLCYIPIGIGAASSGLVSLYYDIIYERAKTQGKRWTSIPELQRLPVACIGGPCLTISLFWLGWTASPQIHW…
g560.t1	OJJ77387.1	OJJ77387.1 hypothetical protein ASPBRDRAFT_190695 [Aspergillus brasiliensis CBS 101740]	Aspergillus brasiliensis CBS 101740	83.6	238	36	1	1	238	1	235	1.06e-115	340	MRLAASLVLYLAALVCAREWARTTDPESPQLDEGDEVATTIEENSVEGYSITCYDRTRIPACDVVEEVTIVDAVTSQTTGIEYDLTIVDGDELEESDLSPQTMVCDLDSTKPVICTVTEINESPSYSGVKSESLEEEYDTATAETTSETSDIETTLSCSSSSLAISTHAMSPTTSGSVRSTSSVGPSVGSMSITNTQIRVSSASPTSSAHSTGAAPIATGEVAMMAGGAAMALLVAIL
g561.t1	OJJ77388.1	OJJ77388.1 hypothetical protein ASPBRDRAFT_166202 [Aspergillus brasiliensis CBS 101740]	Aspergillus brasiliensis CBS 101740	95.6	612	20	3	1	609	1	608	0	1182	MISAPLQPSFSDQTDFDNASRGWIGSLEPGIIRAADGRPVYNNDAYHFLQDAECPPTANPKLWRQGQLASKQGLFEVTRGIYQIRGLDLANMTVVEGTEGVIVIDPLTSVECAAAALALYRKHRGDRPVTGVIYSHSHIDHFGGAQGVLPTSEAVRTANPIPIVAPEGFVEEALSENMYVGPAMRRRAQYMYGAQLPKAADGQIGCGIGMTVSMGTNSFVPPNTIVTSTGEERIIDGVRIRFQLVPETEAPAEMNFFFPDHRALYIAECATHSLHNIITLRGALVRDAKAWARYLDESLVLFGLESEVLFAGHNWPTWGSAQIAQLLSEQRDLYAYLHDQTVRMMNQGLTGIEIAETLTLPPALQTAWHAQGFYGSVSHNVKGIYQRYMGWFDGNPAHL…
g562.t1	OJJ77389.1	OJJ77389.1 hypothetical protein ASPBRDRAFT_166203 [Aspergillus brasiliensis CBS 101740]	Aspergillus brasiliensis CBS 101740	97.7	399	6	1	1	399	1	396	9.83e-291	796	MAELRKVSASQAAQQQQQQQQQNDGDVPSLKTLKDAIPAECFDSSVVTSLLYLARDILYCAILTYGAFHIHLLPSVPLRALAWAVYGFFQGCVGTGLWILAHECGHGAFSKHQTFNDFVGWATHSFLMVPYFSWKYTHARHHRYTGHMEKDTVFVPWTDNELAQKKNVRIEQLKHLTEETPIVSFLQLIGHQLFGWQLYLFLNVTAGPKSLPENRPIRGVASHFNPFGDLFTKAQWFSIALTDLGLLIMGSILYYASTQIGVWNVVLLYFVPYLWVHHWLIAITYLQHTHPNVPHYSADSWTYTKGALATIDRSIGFIGRHFFHEIIDYHVVHHLFSRIPFYKAEEATRAIQPLLGANYHEEKESSFLYSLMTTFRKCIYVSDGKKNGVLHFVLPEEAK
g563.t1	OJJ77390.1	OJJ77390.1 hypothetical protein ASPBRDRAFT_190698 [Aspergillus brasiliensis CBS 101740]	Aspergillus brasiliensis CBS 101740	82.9	82	14	0	1	82	1	82	2.16e-42	143	MIDFQFPISPLIVDLCHKHDLTIEAGRIGEQGAEWYVAILVRYNEVNFGTFAARLSGLVNEEMLKYLIDYDKKEEERRRGRYRG
g564.t1	OJJ77391.1	OJJ77391.1 hypothetical protein ASPBRDRAFT_654715 [Aspergillus brasiliensis CBS 101740]	Aspergillus brasiliensis CBS 101740	91.4	327	20	2	1	320	1	326	5.44e-207	578	MPRTRSHSMPYSTPYPYLPPSLYTHPSVPFCVSPTIDYPEYPQSDPSPSPPLSPPQSITPRALSPALTLQPPQPPPELQPQPPIPTSNYPKLYILDGDTAAGLAIRYFIHERGGMRIRAGFIDVHLKDQILPSFIWEDTHAGELPLLFLDNPTRRPVLKIVGFDAITEYIDSVSPVPDRYLYGYTEQERALIRSCIYCLRRDVVDPLYEWNNHYLGNKSGEEVTGYMPVPGRRSVLRERIEMSLEQVEGNLEGLEYLLGNFCAADVYLYGMVVAHADRWPWFFDEVRRPRLTAYFARMSERPTAHLADGFWDTTRTTVVH
g565.t1	OJJ77392.1	OJJ77392.1 hypothetical protein ASPBRDRAFT_70814 [Aspergillus brasiliensis CBS 101740]	Aspergillus brasiliensis CBS 101740	94.3	318	18	0	1	318	1	318	3.13e-215	599	MSFSAQSTSEEVCHVLAEYIKGSRVLITGVTLGGIGGEAALQISRHAPALLVLASRNLENLQATENAIKRETPDANTRLLILDLSSQQSVRKAAAEVNNYPERIDRLINNAGVMAAPYMTTPEGVELQFGINHIGHFLFTNLILGRMVSEVSTVRIVNVSSAGHKRGPVRFEDLNFQNGKCYDKWQAYGQSKTANMLFSVSLAEKAGGKGVESFSLYPGRRETGIGRHLKLEEWVNAGWKHEDGSINDDPKLNWRTASQGAATLIVAAYDPSISDKNGSYMVNNQVNNDEAAGYALDPENAERLWKLSEEIVGQKFEY
g566.t1	OJJ77394.1	OJJ77394.1 hypothetical protein ASPBRDRAFT_36622 [Aspergillus brasiliensis CBS 101740]	Aspergillus brasiliensis CBS 101740	94.8	539	24	1	1	535	1	539	0	1068	MGNHISYQTSGCQIQLPGTTGSIKGLQKDTKSRRFAGIPYAQPPVGDLRWRKPQPYTLQQLIADQPGATYDATHFGPVCPQPNYSKAVNSHGPKNTYHEDCLRLNIWTPVPDPHVRNPKWPVVIWFHGGWFQIGDPSQEPGMDPTELIATAQLNAIFIAVGYRLNVFGFLAGEALREESAGHEVGNYGLWDQRLALEWVYQNIAAFGGDPENITISGRSAGAYAVQAQVLYDFRGEMEETMRNKFRRLYMHSNAIPSQPKTVQDCQPQFDELCQHFNIPADLTEAEKLQKLRAISATDLCDAIMNLKHHTFRPVTDGVFIQPGVFDYYRDGSFAAEFKRRGLRLFIGEVRDENTLYAVTNGPEANLESLKLQVSNYYSPATTDRLLRHYALPDSTDKQE…
g567.t1	OJJ77395.1	OJJ77395.1 hypothetical protein ASPBRDRAFT_202381 [Aspergillus brasiliensis CBS 101740]	Aspergillus brasiliensis CBS 101740	95.1	384	16	2	29	409	31	414	3.32e-263	728	MLSILRALACFIPRNATYEPLSGRTDPPQCDEKKPQCTKCVRHSIECDFASPASSASPDPTRRFRFRPSKYQSGSRTSSPSTHTEAASTSTAVQCDLAGSGLTGGISFADLKLYHHFVTSTYKTLSDETTDHKHVWSHHVPHWGISFPSIMHLILALSALHQGHEDPASRTQSIAQADDHFTFGVRSVSAVLCLLNAENCQRIYMSAALICLVYFGRGPRRGEYLVFSDTGRSEWLVLLHGVHSIVSQNHGRIFTGVLEPIPDDSIGGVSDELQVELDEHLQRIRHVQAYIMSHVMDETSRDKFDAAIKDLLSAFEEVYKIRSAGKDGICLMHLVIGWVYRLPMEMIALLEQKDRYALILFGYWSILLVYMRSSWLMQGWDAHVLHGVRTSLGEDQTWL…
g568.t1	OJJ77396.1	OJJ77396.1 hypothetical protein ASPBRDRAFT_166212 [Aspergillus brasiliensis CBS 101740]	Aspergillus brasiliensis CBS 101740	98	293	6	0	1	293	1	293	5.02e-212	589	MDFQFHPGVNGSDPWVDFYPYTPSATAGYTFMGIFGVTTLVHFVMMFPYRAAYFIPLVIGGICETFGYYGRAWSHQGRTLIGPWALQEMLILCAPPFIAATVYMILGRMMIAFAAEQHSLIRPKRLTKIFVLNDIICFLTQIIGAGVQVTGDEQLMRTGIKAVLAGLIFSLVVFLLFVWVAVVFHIRLSREPTWVVNEDPWLMNGGWKRYMWAMYVACGALMVRNLVRTIQFGAGDGSVLNTKEVYIYVFDAALMFVAMAVLAVWHPGMLIKKARRTKVAAEYCQPMTDVEGEERS
g569.t1	OJJ77397.1	OJJ77397.1 hypothetical protein ASPBRDRAFT_237609 [Aspergillus brasiliensis CBS 101740]	Aspergillus brasiliensis CBS 101740	98.6	217	3	0	1	217	1	217	6.23e-151	428	MGSTQPEFKNPATSTLLELVKARRTYYGLKAESPISDEAIESIVSNAVLHVPSSFNTQTSRVVLLLKEEHQKVWDIAIAAMEGLVAAGTLPKETFETQTKPKLNAFRAGYGTVLFFVDFDSLAGIKEKFAIYADKFDPFALESNAMSQFLVWTALESEGFGANLQHYSPLIDEQIQKQWNLPASWKLDAQLVFGVPTSEPGEKTFAPLEDRFKVFGK
g570.t1	TPR07621.1	TPR07621.1 hypothetical protein CAN33_0028490 [Aspergillus niger]	Aspergillus niger	72.3	494	137	0	1	494	44	537	4.65e-256	719	MAYDANDRFFWGHQAANRNDALVWTKLLVDGSPAVDIRGSNLEGIVNGRTNTPGGKSVATVIGDFLGALRMQILETLRTRAVDPQVTWCLTMPGCWSTVGAQVFRDAVTHARFHAPGHQVLFTSESWAAARWVEYSLRANQGIRTEDVLLVCDSGGATTDLDLIEVDGVQPYTFRSPNTAMSRRCRGVDVESGLFQQLRDRFHSPRGFVRGETGATARRAVSEAKQQFTGEHGNYVDSQILRGGALRRHRFEFADFVAAFDPLVTTAYESISQMIERHRGQVTKVVLVGGMSKSRYFRKYIQDALNDLPADSRPGLLDPIPDAISAVARGAVLQAMGQPRRIESLKGYQVSLPFIEPGPNGFRNCSRTFVAIRQGVRDVPRQGELQAVVRFRPHESVRN…
g571.t1	OJJ77399.1	OJJ77399.1 hypothetical protein ASPBRDRAFT_202384 [Aspergillus brasiliensis CBS 101740]	Aspergillus brasiliensis CBS 101740	96	420	16	1	1	419	89	508	6.87e-271	752	MATTPTQTKPSKRASDEEREESPPKRQNPVPSRPIYPNEKYLCRRDEYHDMINHHNSIYYTRSGPRTAMGAVSDAFESVFVRVRTWATVWGKEGSLSHLSDADKQEIIASLDEYCVQDDWDSIRRSLPPAARVNFAFILVETMLNQFIFAKFIDSPFWFLDGKTKATDSDTQSDFHKRFQYVYEKLLSVSRDNAAWWKSIIIGKLNDEPCVFNNLPPTPVGRTTIQHRKTLVKAYTDELMRSRLLKLLLRDDALTKYQRSKRKTTLRLILETASQAVVHGDGGLYGNTNIIRLPDLPRFNTWTGQMLVHPFHAGFEPVEEGRVLIVTRPCYSYLDIISLNHFAPMPPWMVNRAEVLVAPKGRKARARWAAAAAEAGDDDDDDDDCEDTSQEDDDEDDET…
g572.t1	OJJ77400.1	OJJ77400.1 hypothetical protein ASPBRDRAFT_25067 [Aspergillus brasiliensis CBS 101740]	Aspergillus brasiliensis CBS 101740	91.2	537	30	1	1	537	1	520	0	999	MEVRQWSPPDAPEGTPVTPSILSLTNNQVAEWGHPAAAERNRVSYMKLCIEGPPVVPVGSLDLKTLLGEEGFKRQQRRRAERMICKYLRHLREAFCADDNVRRVQDTNNLRQIDWHFSMPACWTAEGIRTMRSAVEGAGYLDNDNAVYYCTEGIAAAIGVSYRLRADIARVGDQVLICDIGGATTDITTFAITAMHPSHNWQMSFRQVAHDSTADCANPFVEQQLLQHLRQSLGLALGSGEVARLALEAARTAKERFNGTDDPEVPLPLDEEYLRRHYNGECNDFDWRGQLFRYPAQVLRNSLDHVANHVMGHIIRHIRAHGANRVVMVGGLSCSPYLRGRIESHFENNPDVSQLLPVMYLPGLDPVTIISHGLTIKGSTLIHPMQYQSEWGYEIFYPF…
g573.t1	OJJ77401.1	OJJ77401.1 hypothetical protein ASPBRDRAFT_190709 [Aspergillus brasiliensis CBS 101740]	Aspergillus brasiliensis CBS 101740	92.8	473	33	1	1	472	1	473	2.90e-282	781	MVTTRMAKALKRTRSDAESSDSDDGTASISSNSTASNSGNATANKPGSTDIYGNDYFFCDRDEFHDVLQQLNDMQHQPAFRRGYPGLMKEEFHRLHGSLMSWTWRYHRDENLAPLSKEAKQDIIASLEGQCVQDDWDSIKALSPPAIRESMCDVLLQAMLYQFIFATFIEFPFWFLDGRIDPTDTEGDPQFLRRFQYLYERLRAASGFGAACLKSSIITEANARPVVTGIPYETEIAQNTFDHRKTLISTFTDELLKRRVFQLLLRPLDDDAEVARRHYGLHFVLEKAVETIIYTEGGIYGNSVIVRLPELPVFDYEDNRMTSHYYHFVGYRRKPGFAPAPGGRSLIVARPGLTYVDMRKFGRVQRIPPCQMFPAEVVAEVLPEETNPKSKAKPRKTTS…
g574.t1	OJJ77402.1	OJJ77402.1 hypothetical protein ASPBRDRAFT_190710 [Aspergillus brasiliensis CBS 101740]	Aspergillus brasiliensis CBS 101740	87.4	549	57	1	33	581	13	549	0	955	MNNQRLTAGLDHGVTKTGKWQPFFSPYISLLLFPLVSYWNQLRRQSVEWTPPGATSSIIPSVVAYPNGVHQPSTYGNPALDQTPRYAWTKLLVEGSPVVPVAQLDLHALLGGYDDAFNYRDRPETVRLISDYLANIRIDFCNDQAIRDALAIENLPPIDWHFALPACWGAEGLALMQDAINRAGFRMNEGRVFFCTEGVAAAIAAANRLRDNSLARPGDRVLVSDLGGLTNDFSLLDVVAVHPTQPHRLIFRQHAEQSTADCANPLVDQQLLQHLRQSLGLPLEAGNVMRIALQAAIAAKHSFNGREWVRVNLWLPRWYIARYYRGRCDAFDPQGRTFIFSQDVLHQSLGPVVTQIQNRMIALIARHNPNKIVIVGGLSRSPYLRERVSAMLATRYPRI…
g575.t1	OJJ77403.1	OJJ77403.1 hypothetical protein ASPBRDRAFT_654738 [Aspergillus brasiliensis CBS 101740]	Aspergillus brasiliensis CBS 101740	97.1	456	13	0	1	456	1	456	0	872	MVPSTRRTKRAATNDPEAARSDDESSPEPERVYPTDYHFSTREEYHDFYTQLARLSTGAMFYRGDPPFMHEEFKLLHILLMSWTWTYGAEEDPNHRLTEPGHLSKEACHLSKDDKQEIIASLKGQCVQEDWDSIKALCPPAARRSLCTVLLEAMLYQFIFVTLLDSPFWFMDGRIDPTDVDGDPQFHKRFQHLYERIRVRNSFGAAWIKSAIIGESNESIYGGTREEVELAKCNLARRQAFVEQSRDELLGRRVFQLLLRPVEGEDIALRRDGLQRVLQKAVDTIIYTEGGFCGNSVIHRLPDLPVFQYDSEIMVGHSYHGCDRYRTPDWAPAPGGRVLIVTRPGLTYVDIETYGRVGRVPPHRMVQAEVIAEVIKKKPTSGKSKSKRKPKTARKNKSR…
g577.t1	OJJ77405.1	OJJ77405.1 hypothetical protein ASPBRDRAFT_166220 [Aspergillus brasiliensis CBS 101740]	Aspergillus brasiliensis CBS 101740	99.6	459	2	0	1	459	1	459	0	888	MAPTTRDLEALAVHHDSDILADDLAEKKVSAHESPPENDPFGNEECGEVKYRVMKWWHCGILMIAENISLGILSLPSAVATLGIVPSIFLILGLSGISWYTGYVIGQFKLRYPQVHSMGDAGEILFGRIGREILFFGQLLFCIFLMSSHILTFTVLFNTITGHGTCTIVFGVVGLVVSFIGALPRTMGKVYWMSLASCTSITVATIVTMVAIAVQAPDHVQVDITTHPSFSTAFLSVTNIVFAFIAHVAFFGFASEMEDPRDFPKSLAMLQVTDTTMYIVTAMVIYRYAGPDVASPALSSAGPLMSKVAYGLAIPTVIIAGVVFGHVASKYIYVRVWRGSPQMHTNSLSAVGSWVAIALGVWVIAWIIAESIPVFNDLLSLISSLFGSWFSYGLPAMFW…
g578.t1	OJJ77406.1	OJJ77406.1 hypothetical protein ASPBRDRAFT_654742 [Aspergillus brasiliensis CBS 101740]	Aspergillus brasiliensis CBS 101740	92.3	312	23	1	1	312	1	311	2.12e-212	591	MRPRYLWIIQAIVLLGLLAALYHLQFQSNTLSQDPISKHHPLEITIPQTIHQLFISTPENPGPTFSPDRHSVSWLQSGWKVEYWRESSCLDLARELDDDNHDSNTGSYAATFQALPAPILKSDFCRYLILFARGGIYNDLDVQLLRPLPWPVMGVATDGDGNPPAVVVGLEGDAATTGLPRSPQFVQWTMASVPGHPVFRDVLRSIVDRTARYVPTQTAGTDADIDVMGWTGPSVWTDAVLGYLRCDDEQIQQLRDLRETVRIRDVVILPRRAFAVLQGEDQSAPDVLVKHYFEGSWKGCAREWLRWLWLGC
g579.t1	OJJ77407.1	OJJ77407.1 hypothetical protein ASPBRDRAFT_25073 [Aspergillus brasiliensis CBS 101740]	Aspergillus brasiliensis CBS 101740	97.8	182	2	1	1	180	1	182	1.45e-120	348	MPDFYPALRNRRNNELARLADEHLQHDLRAEDRDALTTATQKVAWWTTIGSAVGLGLGLYAAFRLRSSCKAFFEVFRAREKPTHVVFPGGRSEPIPDITPLLKPTTLGDFATYFFASAGGFFLGGEIGILGGTASGSRCITADPDRRQRIETAFRKFRAEVLRKEADELDRGLDVTDQMF
g580.t1	OJJ77408.1	OJJ77408.1 hypothetical protein ASPBRDRAFT_36627 [Aspergillus brasiliensis CBS 101740]	Aspergillus brasiliensis CBS 101740	70	577	152	3	1	560	1	573	9.57e-260	733	MVHIQDLPRELLLHILSFVAHRDPFEDLSDSPDNTTNTTNTTKKPKENTKKESQPRTDRLFPRPPWEPAEEDDEDQWVDEEDSDEDEEEGGTQSEEMIDLYNLCRVCRLFRELAQPLLFESVDLPGFPGDLRSLISINRTLIHRPSLGEHIRNLSVSPDPEPHIFGKIPLFLDEDDRNDFVSAIRNLGLDKEAWREWMTALKELDYSLLAVLLIWKAPNVRTLKVMGGHFAMKPLKQIWQRHPALLSKVDELWLEGDASFSYYPLGLYEELVRRLPLRLIEIEEANLSDAMFPASWTPQSLSMRQLSFTFCHIDAPSMTKLLRACRTVTHFEFDNFSTDPTDHPPNFGSTPEFTAPELLAALRPHKDTLEALRVAFRRHPGERDNIEAYTARQTKFGSL…
g581.t1	OJJ77409.1	OJJ77409.1 hypothetical protein ASPBRDRAFT_36628 [Aspergillus brasiliensis CBS 101740]	Aspergillus brasiliensis CBS 101740	98.3	424	7	0	1	424	1	424	0	871	MAVQSLESVRGNGNLMDHAPHPSDPSIWSDRAVQEACLMRYFVEELAPWFDSCDAGKHFALVMPDRAAQCPALLYAVYSAAARHLGRWQSTGTRPVVAFAGRYLPHLGDGLALDYQSRCISHLVSLSADDAEIHNMDLLAASVILRFYEEFDAALAGGDGKTHLRGTQVFLNAQGHSALRGGGLQLAAFWVGIRQEFHKAFLEQRVAELDLSCCDGSAYRRLDPTDDPTWANRAVLHGVDVLRYCYSEADQTRWHYEELCAYNRQWQVLTPPTFDPLYYRPPNIVKGEIFPVLWYLDDCIVTGIQHWHLARLLLTVFDATVPRLGPGRKAAVARRETEIKHHVFSLCGIAISNKTAPALVAACMGVSMCGDRITDRREQEALFDILLQIEQIHGLSTTH…
g582.t1	OJJ77410.1	OJJ77410.1 hypothetical protein ASPBRDRAFT_36632 [Aspergillus brasiliensis CBS 101740]	Aspergillus brasiliensis CBS 101740	99.6	490	2	0	1	490	1	490	0	1007	MSKPVYTLAEGQPLPNPSVSTTLPTFGGGAITTLGDTLLIETLTHFNRERIPERVVHAKGNGAWGEFRVTKDISHLTRAKFLNGVGKTTKVLFRASTTGGEKGSADTVRDVHGFSVKFFTEEGNHDIVGNHVPVFFVRDPVRFPSLNRSHKRHPTTGLPDMNMYWDFHCNQPESVHTLMHVFGSRGLPQSARRMTGFGIHTFKLVGHDGKFRYCKFHFRPVLGSHNFTPEEATRMAGVNPDFHNEDLFQAILRGDYPKWKFYIQIMEPEQAETYGRAVFDITKVWPHKEFPLIEVGEMTLNRNPENFFAEIEQAAFSPSNLVPGIAVTPDPMLQARMFAYPDAQRYRLGVNYTQLPPNRAICPVYAPYERDGLATMGRNYGGDPNYIKSTLTPGVFSQS…
g583.t1	OJJ77413.1	OJJ77413.1 hypothetical protein ASPBRDRAFT_50305 [Aspergillus brasiliensis CBS 101740]	Aspergillus brasiliensis CBS 101740	89.4	603	24	4	807	1400	1	572	0	1018	MTIRYLKSKSQTASSAATPQVDVSSVVKGVIDDVRANGDAAVRKYSEKFDRWSPASFKLSQADIDASLAACSPQTIADIKEVQKNVRAFAQAQRDSIRDFEYEIQPGVHLGQKNLPINSVGAYIPGGRYPLLASAHMTILTAKVAGVPHVVGCTPPIAGQIPHATVAAMHLAGADEIHLLGGVQAIAAMAVGTETIAKVDFLAGPGNAFVAEGKRQLFGEVGIDLFAGPTEILIVADETADPFTIATDLLSQAEHGPDTPAVLITTSERVGKAAIDIVNELLPNLSTRELAGTSWDRFGEAILVDSLDEAWKLADEYASEHVQIFTKRPREALEKMTAYGALFLGEKTCVSYGDKVIGTNHVLPTKKAARYTGGLWVGKYLRTVTYQEVTSSTASGELG…
g584.t1	OJJ77414.1	OJJ77414.1 hypothetical protein ASPBRDRAFT_141138 [Aspergillus brasiliensis CBS 101740]	Aspergillus brasiliensis CBS 101740	93.6	408	26	0	1	408	1	408	3.11e-281	773	MLEIISPQTMRKSSRLSTLPLEMVERICHELATQDLAALRGTCRAAHHLTNRCFAQRYTEYYTDFSARSLNHLHALAENPLIRSYIQHLVILSPEPRLGQNMDWHWTAAGHLRCPLDMPLIRRLRDDLTQKLVNCRSFILSPILSEPEAKADLHDSPSFNPDDVACILLDVIADASLPVKLFWYGKGMNYTSKVMDIARLPKSLYSNAAFRTGWQSLENLHLEQELTPQNYTFVMDMILSATGLRKLHLGLGYTDLSVEFFAQLSTSIATLHHLERISIWGTSMHTEDLIRLLSGSRTALKKLSLRSVTGLTPEWLAYLCQHCGSFPCLTTLDLGMIHGPAGMFGFTPVQNLPREQKNMFELEQCVSEDVPGAGGKASDIVGIAYSGSDIETALNVLLQ…
g585.t1	OJJ77415.1	OJJ77415.1 hypothetical protein ASPBRDRAFT_202394 [Aspergillus brasiliensis CBS 101740]	Aspergillus brasiliensis CBS 101740	86.5	289	39	0	1	289	1	289	6.73e-180	507	MSLPFQVLGEANQPFLESCRHGDLAGVKEHQEGAKALDQELLTMGLREAARGDHIETMRYLLHAGAKPRSPTVVDEVHSTEAIQALLDHGLTFETQLYPLNTVPLVYIVNKNDERLLRWCLEQGADPTFGCPNAQSCNDLEKLDQPPTKGSGAVLGTASRRSTPEIIDLLLDHGANIHNSNVLHYVACRRGERAIPIMEHLLQRGADVNEFGYPAFLHLGGTPLHAASYQGNLPAVRWLLEHGANSGLEDSQGNTPLDIAALEEEDEVCELLYEWSRVNNAGKAEDASSG
g586.t1	OJJ77416.1	OJJ77416.1 hypothetical protein ASPBRDRAFT_60998 [Aspergillus brasiliensis CBS 101740]	Aspergillus brasiliensis CBS 101740	92.8	83	6	0	1	83	1	83	1.94e-41	155	MKTTLATAIILFSSALAAPIAKPGNTPVDNESPVNIPTGPGPVCTDTEICPYEVSDSQYARRQEPIPAHAQGSLIGGGLGRRDGEDVPAEVLASLLGRRQEPIPTDAIISLAGGGLKRREEEDVPAEVLASLLGRRQEPIPTDAIISLAGGGLRRREEEDVPAEVLASLLGRRQEPLPAAAQASLLGGGLGRRQEPIPTDAIISLASGGLKKRGDEDVPAEVLASLLGRRQEPIPAHAQGSLIGGGLGRRQEPIPTDAIISLAGGGLKRSEESDVDAY
g587.t1	XP_041543420.1	XP_041543420.1 uncharacterized protein AKAW2_41340A [Aspergillus luchuensis]	Aspergillus luchuensis IFO 4308;Aspergillus luchuensis	85.7	435	62	0	1	435	1	435	4.01e-277	765	MTYPYLIREHLMDAQYMREYPRATADQDTPLKLCIKQYIPKDNPEPKTGDLTIVAAHGTGFAKEVYEPLWEDLHARSKEEGFKIGSIWIADAANQGVSGIVNEACLGNDPSAYDHSRDLLLMINQFRDKMTRPIMGVGHSLGATQLVFLSLMHPRILQSLMLIEPYMIEKNTDADAPLLVHLTKNKRDVWPSRAAAEEKARQYLQSWDSRVLERWFQWGYRELPTAIYPKDGTHGSEVPVTLTTTKFQEALIYARANPYRHKELGVHDNDNSERPTNPPHDPLFFPDVMAGLPPGQQAYRPEPIVAGKLLPHLRPSALFLSGASSPLFKSGLHTTMAKRTGRSVGGSGGVAYDRVRHVWVEGAGHALPLEKVDSTARTLAEWIRMEMERWRTDEARIAA…
g588.t1	XP_001401354.2	XP_001401354.2 cytochrome P450 monooxygenase [Aspergillus niger CBS 513.88]	Aspergillus niger CBS 513.88	86.4	441	60	0	1	441	1	441	1.53e-276	767	MGLYLISMGVIALFCYAFSLATYRLYFHPLARYPGPWLGALTNWYAAFYAWRGNLHTKDYEWHEKYGDIVRFGPNSLSFNTSKALSDIYAVRANIQKSDGYASMSPSRYTPNTLTAISKNIHTFKRRILTQAFSDQSIKEMEGRIQENISSFLDILISGTGSESGWSSPKNISEKCDWLAFDVITDLSYGNDLDMLNSPQMRWFPSVIRKISQRSLIGLFQPCFIKFRLDVVLLTQKYKEIVAAARWTRSQAAARLQLGNNNEQKDIFGAMLNAKDNKTGLQFTRKDLGLESMLLLVAGSDTTATALSATLNCILHDTNTLAHLTNIIRTTFPTESSITATSVLSSPDCSVLHASINEAMRLTPPAPNLLPRTVLSGGMEVDGIYVPAGTIVGVSAYTI…
g589.t1	OJJ77419.1	OJJ77419.1 hypothetical protein ASPBRDRAFT_70828 [Aspergillus brasiliensis CBS 101740]	Aspergillus brasiliensis CBS 101740	99.4	356	2	0	1	356	1	356	3.74e-253	709	MTHNILITGGSGYLGGTMLARWKNANLPAYGQLYALVRSPDQAEAVKAYGAEPLFLNLDARDEVLQALCDRAITIVYYLIDVYKGDRQINLLEGLAQVKKKTGHEVHFLHTGGAKQFSSHVGMPTDRNISDVDPALYSLQRSAHGPHQFLSDSVKVNCDIIDTAEELGVHSYIFVPCAVFGKGEGFGNQVSIQDATIVQAAQKLRQVYKVDSGSPVWPVCHVADTAELYLQLLRKMLLGEKIGSGKNGYYLASSGLLAWDQIYSAISAALARRNIVDSDAVQDAREGTLDQMGQALDVEPSSVPVLLGGKCTFVSEHGKQIGWVPQYAPEEFVRCMDEEVERILDDLATNARASIRCGARGVFPRRYREQLEPGETYELVWPGTKICLWDWGVPSDYVG…
g590.t1	OJJ77420.1	OJJ77420.1 hypothetical protein ASPBRDRAFT_36642 [Aspergillus brasiliensis CBS 101740]	Aspergillus brasiliensis CBS 101740	96.6	353	12	0	1	353	1	353	8.40e-249	687	MDTIVPKALKRGDKIAFISPSARLNGILPTPLERGKACLESLGFRVQIIFSSQATATIAESIRVRCEEIHAAFRDSTIAAIICTIGGAHANELLPFLDYSLIRSNPKIFVGYSDTTFLHYAIQSRTGLRTFYGPSVLTDFSDFPKPIQFTIDHFVHVLTNAGASVGPLPRSSLCSKEHSDFFFSKEMSDRSRELVDAPAWRWLRRGRATGYLYGGTVTCVVRLQGTPYAPASWKDKILFLESAMGDNLQLPYSVSRFRNNLVDLALSGILHEIRGLVVGRGYKYDNQMQDELASVIEEVFDVIVGRSREEQLPILMNVDFGHTSPFLTLPINTLVRLDGDLDEFSVLEPGVRA
g591.t1	OJJ77434.1	OJJ77434.1 hypothetical protein ASPBRDRAFT_36658 [Aspergillus brasiliensis CBS 101740]	Aspergillus brasiliensis CBS 101740	53.8	325	128	6	7	318	8	323	8.86e-92	288	MVSTTPPVPGRPKLRHSCNARSASKVKCNRGKPICARCAKRDLACEYLVTRRAGRKHDKSHSPSNITTSSDLSLFAPDWPAIGTPIPSTTSSAVDYFPQLHSHSNSEQLTSLAVSFGTFLDSPASFRPLDISDQLLASLAAYVDGPFHSGEDLSYLPSDRLPTTHPCPGNSTNHKAAPDQSSCSCLAQALDLFSQLLSHDCAACTRNHCPGGQALTTDSIVTTNAQTVDAIIYILHCLCAHDSFLFVLIFLIAFKVLGLYAVAARELPPDPTDPKGDDVAAAEPLTENPALLTAQSVLSELHRMQKLIHAVSTKLKRY
g592.t1	OJJ77422.1	OJJ77422.1 hypothetical protein ASPBRDRAFT_36645 [Aspergillus brasiliensis CBS 101740]	Aspergillus brasiliensis CBS 101740	94.2	414	23	1	1	414	1	413	3.44e-274	756	MQSSIDKLEAYARQVLDGAQTLTTYCRMHHAEPFPLAEASSDVQQARRVILSHLFQIQILLSEPQDFLQQLATQQNQYLACLHWLGEFQVLACIPLSDSVPFQDVAELAGIPESHLRRVVRMMAATGFLREPEPGHVAHSPLSASFVTRPSYLDAAMFLAETAAPAALQMPATSRDPVSAPLAMTTAHAQLPKLQRQWSAYLQYGLGHTDGNILEPLNQFDWLGLGGGTVVTSGTHAIAAIRTLADRYPTLLRLIVQTPGDIDTDRIYPRITPRKRATGTVQDVADADVYVIGLPSPSPTLPITAIREQMESELRAHLSVARGARRPAILLLTAHLVCVHGSGSASTGELVGRLHDLSLLQLANERDMEMTELIQIVSSIGDGSGRMGVVRRMVAAHTA…
g593.t1	OJJ77423.1	OJJ77423.1 hypothetical protein ASPBRDRAFT_36648 [Aspergillus brasiliensis CBS 101740]	Aspergillus brasiliensis CBS 101740	98	251	5	0	1	251	1	251	1.57e-170	480	MSPRVVLITGANSGVGLATAKVLAQASEGFHVILACRSVEKGTQALEEIKQEGIPTENISTVQLDVTDQTSIQAAAASVQQRFGQLDALVNNAGVASRHPDIKTRLQLCMDTNVIGPAVVSATFRSLLLRSPNPYTIYVTSGVGSLTLASDPTSRVFHGPSNGEAYRASKSALNMIMVQDWAASLDTPLKIFAFCPGFVRSNLRGTSEEERSGWGHASDPMIPGNTILGILRGQRDAEVGKVIHKDGSFPW
g594.t1	OJJ77424.1	OJJ77424.1 hypothetical protein ASPBRDRAFT_36649 [Aspergillus brasiliensis CBS 101740]	Aspergillus brasiliensis CBS 101740	98.4	374	6	0	1	374	1	374	1.24e-272	749	MPPPPPLPKSALGRHRLLAPTASVRVSPLSLGGMSLGNNWKGVMGECTKEQAFELLDTYYELGGNFIDTANMYQFGQSEEWIGEWLQKTGRRSEIVLATKYTLSPVFGNAVQQSNYGGTGTKSMRVAVDESLKRLQVDYIDLYYVHAWDFATGIPELMQSLNTLVQQGKVLYLGISNTPAWVVTKANAYAREHGLRPFSVYQGRYSAMMRDLERDIIPMARDEGMAIHPFGVLGSGYFRSPDAPPKEGGRQTPHMKTGREEQVSAALDIVAKRHQVPVTSVALAYTLQKAPYIFPMVGGNKISHLKANVEALSLELTPEDVAEVEKAYEFDLGFPHNFLNLGGFMSQGPQHVSFLSNLGHFDYVEPTAAIKPAK
g595.t1	OJJ77425.1	OJJ77425.1 hypothetical protein ASPBRDRAFT_36650 [Aspergillus brasiliensis CBS 101740]	Aspergillus brasiliensis CBS 101740	97.9	326	7	0	1	326	1	326	2.03e-240	663	MSQTSTRLETPFTTAALGSDVSFWKSYIASRPNPPETFFRLINEYHTSHSDGRMEVAHDVGTGPGNIAARLASYYDQVVGSDVNEQALAAAPKLISPDLLERMTFVQSPAEKLVTAGLPTELQQTDLIVVSECMPLLDAPRALEAFHTLLRPGGTLAIYFYGRPIFPDPVCDGIYDRMATRICQFLLPFKGTPGEPFHRRGAEGLVSFLDNIALPGGDWQNVERYKWNCDYPLLFNSPEGFDFEFHPVDRRAPGEVTHDIVDREFWVHEWDADDVKAYLDSVYPHYRHQAGESYAEIEAMREELRAAMGGKQKVTFSVVLVLGSKK
g596.t1	OJJ77426.1	OJJ77426.1 hypothetical protein ASPBRDRAFT_190733 [Aspergillus brasiliensis CBS 101740]	Aspergillus brasiliensis CBS 101740	95.9	613	9	1	1	613	1	597	0	1255	MFTQRLLPLGTLLWVVWTRASRSECVHSPQSRDCWLPGFDIHTDYEEKVPPGKLVEYELTVSNQVIAPDGYLTNGMVVNGMLFSFTGLYQWLTAVGQYPGPTIEADWGDTLRITVNNNLTNDNGTSIHWHGLRQPMTNYLDGVPGVTQCPSKPGSSQVYEFRLMQYGTSWYHSHFSIQYTNGVHGAIKINGPSSMNYDVDLGPILMSDWYHTDAFALYPTEILTPEAPIPESSVMNGKGVFDCDPSKDPRCTGKKERHEIFFSKGTTYRLSLVNTGSLLTYKFWIDGHNFTVIQNDFVPIQPYETDVLIVGIGQRYDILVKADADFINGTNFWMHANYCDVDTWESRLGIIRYDPLNTSDPYTPPVSEQHYGFGCQDPPPERLIPIVKRQVGKNVNSFD…
g597.t1	OJJ77427.1	OJJ77427.1 hypothetical protein ASPBRDRAFT_190734 [Aspergillus brasiliensis CBS 101740]	Aspergillus brasiliensis CBS 101740	97.9	568	12	0	1	568	1	568	0	1122	MLSLQALLALIVVIPAAARPFPDYAIVGAGPAGFVLADQLSQNPNVQVVLLEAGRDGINDNTINIPAYYPLISGSFWEYSSQPDPNLDGQAPTLQQGRVLGGGTAVNGMAYCRGSASLFDEWAQRSGNPGLAWNSLREDFKATSHYTPQPANYPQVVNTSNYGQGPLEVSRAPTGTGFDEPFAQALESSLSVHEVDMTDGTGLGLCKGLQSIRVSSRTRSYARNTFGLRLEDRPNVRVITNAWVQRIGFAGQKAVNVTYVDTVSNQVHVLPAKEIIVSGGAINTPKLLKLSGVGPAAELSKLGIPVVADIPSVGAKLYDHHFGIVEVEVTQDIMTVWQWATNATEKALAEKQYATHASGPLALDNGLLFAAFRVPDSVFDGINGTHYTSLPADRPHVLM…
g598.t1	OJJ77428.1	OJJ77428.1 hypothetical protein ASPBRDRAFT_36653 [Aspergillus brasiliensis CBS 101740]	Aspergillus brasiliensis CBS 101740	94.7	399	21	0	1	399	1	399	6.37e-290	795	MASTSLSPVPFYDIPNLSDERSRTLHALLQQGHREIGLLLGPKLLFHSHVPHKLGSAYCLGASVNQLKEMYQTETVGLNYEKKEDNSLFTRESVTRQTWQKFINNKSYTVSFTEFFDQEVSQRHGDWKSVVHQYLFDPSYPLINGFIGGLGHPLIHLAYAYELNCPHVATEALSLGCTERDYTFRFMDLPSSGESPSLKDILMKVHADSRFDNLFDLPGYANIFTIFGAAEPALLEYWQAWNVTDPDRQLEELLDLAALLTISTPTQEHEYDFYFAHMLTVGHAVRLLLPHFPSEWVKPVLRQYWMFVLYLYIAQLRPDVAHLTFPSAVEEDKDWEWVKTQAFCGDFGYDSHRLKVVRALRSAEDTWGWKCGQYLACAVQFVQSFNGWTGFGRGVDGVE
g599.t1	OJJ77429.1	OJJ77429.1 hypothetical protein ASPBRDRAFT_36654 [Aspergillus brasiliensis CBS 101740]	Aspergillus brasiliensis CBS 101740	99.6	257	1	0	1	257	1	257	3.10e-189	528	MSSCYAVLGATGNCGSSLIQILLQNPNASIHAYCRNKAKLEKKLPDEVKDPRLHIFAGSISDEEVLGDCIRGCKAIFLVVTMNDNLPGCRVAEDTARGVVSVLKKSSPQPMPKLVVLSSATIDPYLSRNMPWWFHPIMIRAGSYVYDDLRVQEKFLRAQEDWLTTIYIKPGGLAVDKPRGYRLDFDRETSFIAYIDLAAAMVEAVEDVDGRYDFKNVSVVNTGRSAAFPLGTPLCILYGLLSHYFPWLHPYLPKSGP
g600.t1	XP_045962707.1	XP_045962707.1 EthD domain-containing protein [Truncatella angustata]	Truncatella angustata	78.7	150	32	0	1	150	1	150	1.41e-83	256	MAKEDDRGENAALAPSTRKLLCLTICGYRKPGMSEEDYRHHMTQISAPMTKDLMVKYGIVRWTQIHNTSATRALMAELFDPQFANVADYDCFSQAVFRNIEDYKRMKQDPWYKEHLIGDHENFADTKRSRMTIGWVEEFVRDGKVVLNDEHFSPDYPSSARHVRRTSTPDRSMGSSVPLWPSCLARPVGSNRFPLRLGSGPQEKVRSTLGNVCVGRSDDNEHVAFYLDGDAGYQQHALRHPNLEPCRTGRVA
g601.t1	OJJ77431.1	OJJ77431.1 hypothetical protein ASPBRDRAFT_113157 [Aspergillus brasiliensis CBS 101740]	Aspergillus brasiliensis CBS 101740	99.7	310	1	0	1	310	1	310	2.23e-223	619	MGEGGYRQINKALDISAFEHYLVTQQARLPELANVEQLSPRVMRVLGQNPGKFTLQGTNTYIVGTGPRRLIIDTGQGIPEWAELIASTLVDKSITLSHVLLTHWHGDHTGGVPDLLRLYPGLSQSIYKNSPGRNQQPIEDGQRFTVEGATIRAVHAQGHSHDHMCFVLEEENAMFTGDNILGHGSSAVEELGVYMASLNKMQLQGCTTGYPAHGVVIIDLPGKIQGELAQKNRREVQILRTLTEIRRQSGRKMASVTVKELVTTMYGEGIADEVKQRALEPLMDEVLRKLAGDGQVAFELRGGEKKWFAIF
g602.t1	OJJ77432.1	OJJ77432.1 hypothetical protein ASPBRDRAFT_70836 [Aspergillus brasiliensis CBS 101740]	Aspergillus brasiliensis CBS 101740	97.2	1767	50	0	1	1767	1	1767	0	3398	MDVLTPNSTEARPMKILYFSNEFPPDDLQELLRRLHTHSKIAQHDILARFIREATLAIRDEIRQLSTTLRYLVPAFESVLELANYSELRKGPLAGSIEGVLLCVVQLASLIGYYENAPLEFDHTTVKTRLAGLGIGLMVAGAIGCAPALTDIPASGALAVRLAFRLGILVDEVSHTLQPRDTTGSPDSWAYVLPDVTVYEVQEELDRIHAEQSTPEASKIFISALSATSVTISGPPARLKALFRTADFFRDRKFVALPVYSGLCHAKHIYKTEDVARVVQADSMPSVCRPVLPVLSTSTGKPYVATTTEEFFGQIVSEILTQPITWDKVIQGLVQEADDLATVDCRVFLFRMSLAGSELVNGLTNAKLEVSTEDVVAWTKQSSTVPSTPRGPSQSKIAI…
g603.t1	OJJ77433.1	OJJ77433.1 hypothetical protein ASPBRDRAFT_25100 [Aspergillus brasiliensis CBS 101740]	Aspergillus brasiliensis CBS 101740	98.6	580	8	0	1	580	1	580	0	1154	MAEISEIDAGPLANDHPSVFWHIEQGLRRGPDNAAVVCMHQPWDHLVDIVPIGEAPAKNPLGNPAENLADHHPCLTLSYRQIHGAALALAAGLQARGVRDGTRLLTLIPNGGEYAIILWACALLRLTLSSLEVSLLDDQSQLPILKDLQPGVVITPNGHGADIIDQWIQPPPLHVSLSPLGNAHHNGCVSLSQLIALGHAVLPSEDRLLELARQYDPDRIHSILFTSGTSGRPKGCPQRVAALTHVLEHLSWLITPDNATSVLQQAHNSRAIAPAHTLQTWRQGGAVIMAEQSFAVTDTLTALRNHDVTFLVLSPAMVHALARELDGQLRLTDSVRTVHLGGDAITHDVLRTCEGLFPKARVCISHGMTEGLGFFEWPFTKADKEIPLFGEICPTGAVA…
g604.t1	OJJ77434.1	OJJ77434.1 hypothetical protein ASPBRDRAFT_36658 [Aspergillus brasiliensis CBS 101740]	Aspergillus brasiliensis CBS 101740	99.2	362	3	0	1	362	1	362	1.62e-246	682	MESASAAPLPARPKLRDSCNACSASKVKCNREKPTCARCAKRGLICEYLVTRRAGRKRDKTQPHSNTTSSNSPQQTLLYTPELSASGTPLSMSDYFSQLQSFSDPDHLTGLAVDFNTFLGSSGSLPRLESSDSLLESSNQSAPGSIDGSYIDAPFLFDQEFSSLPNGSLPTNHPNPSDSTDSRTGPDKSSCSCLIKILDLFRQLLPPDFGACARNHSLSQDQGLTTESIVATNAKTIDTIIQILCCLCAHNGFLLVMVFMAAFKLMNWYATAARGLSTDLKSDSNATTRSADDTIRVMAQSVLSELHRMQKLVNALSEKLKQYQSEETGDHLISSTVLHQLELDLRQRIRALSSEIIDLLRG
g605.t1	OJJ77435.1	OJJ77435.1 hypothetical protein ASPBRDRAFT_25102 [Aspergillus brasiliensis CBS 101740]	Aspergillus brasiliensis CBS 101740	97.3	584	16	0	1	584	1	584	0	1177	MSIQTNAAANGARGAEDEIPVLSRCVNPEGISWTAIWYSPTGAPSFLVCSYCYDQHIQPTRHAGLFEALWVNGNRDLKCQWNTPRVMSHLAADDWDAINAFMVERTKIPACKGPAGHTGLDGSRWYGMIGAWEIQGFVICEACYCDLVTWNQLKTYFITMPTIKSEEGIWTCDAAVPLIKEGLLRAITSPNRWDDLHPIFRRRMQYPSCVEMTKLQAGSTHWYASKAVPDLVVCTACYLDHFFLDHASSWELLDLTAEQQQQQLVCAMQTVPIYAAWAGCKRASMTENTDEYDGFEHLARLILESHPCSTDDMRNATWYAPEDCTFDAFAICRRCLLAFMVIPDFATGFKEVNFRRDGNWLCDLNPASPRFSKYLPKYEDAVNQGNFSIFSKYVSEYGP…
g606.t1	OJJ77439.1	OJJ77439.1 hypothetical protein ASPBRDRAFT_50319 [Aspergillus brasiliensis CBS 101740]	Aspergillus brasiliensis CBS 101740	90.6	519	26	1	1	519	1	496	0	960	MLGLLIFAGTTFAAAIYAFVLPIFWYLYDPKGLRKYPGFSPLSGFTDLRHVYLSACGYRSRDLYKAHHRAPILRTGPNALSFGNVKAIPDIYGHGTKCVKDLNYVILGGTHTHLFDVVDKQEHGRKRKTLSAAFAIKHLERWEFKVARTTQRLLKAMDSHCTSPLRPQQVTPESADVNFDFNKWVYLFTIEAINNIALSSSLDLLDKGTDVVTAQRQDGTLYPARYREAQSHTAIGQAVFVWDYKHYPLLAQLSKLVPKWRDVWHKAEPWNDIVYHQAATRLQRYLAGEQLDDFFSALMEDKRGNPTNLEWGEIVAEVSAIINAGSDTTAIALTQALDFLIRHPPQMQRLREEIDSVLDADEVVAPYDKVKNLPYLRACLDEGLRLIPPTSAPLPRRTP…
g607.t1	OJJ77440.1	OJJ77440.1 hypothetical protein ASPBRDRAFT_70840 [Aspergillus brasiliensis CBS 101740]	Aspergillus brasiliensis CBS 101740	97.1	491	14	0	1	491	1	491	0	1030	MSVPKILHFPDRPQFTGFMKPCRVEGEVNNLEVYGDIPEDIDGTFFRVMPDPQMPPFIEDDPWFNGDGNVSAFRIKDGTVSWKQKFVRTEKFVREREAGKALLGKYRNKFTDTVRFKVRSTANTNIVHFNGQLLALKEDSPPYAMDPQTLETKGLYDFEGQLPSVTFTAHPKLDPATGEMVCFGYEAKGDGTPDICYYQVRPDGSFSDICWFVAPVCAMIHDFAVTENWVLFPLIPQLCDIDRLKAGGEHWQWSPETPLYIGVIPRRGPKPGDIKWLRWDNSFPGHTLNAYEDANGHIIFDLGISKQNVFFWWPDNQGLAPEPSTITSQLMRFTIDPNTTSEILPDPEILHTGNSEFYRIDDRFATQKHRHCFFDLMDPSLDTDFETIGPRLGGGYPLY…
g608.t1	OJJ77441.1	OJJ77441.1 hypothetical protein ASPBRDRAFT_25108 [Aspergillus brasiliensis CBS 101740]	Aspergillus brasiliensis CBS 101740	96.4	554	7	1	1	541	1	554	0	1057	MSSHMNDLELEDQKYWNEVQAVKDWWRDPRWRHTKRPFTAEMVVAKRGNLKIEYPSNAQSKKLWGILERHFEKQTASTTFGCLEPTMVTQMAKFLETVYVSGWQSSSTASSTDEPSPDLADYPMDTVPRKVNQLFKAQLFHDRKMHEERITTAKADRHKVANIDYLRPIIADADTGHGGLTAIMKLTRLFVESGAAGIHIEDQAPGTKKCGHMSGKVLVPIGEHINRLVAIRAQSDIMGVDLVIVARTDSEAATLITSTIDDRDHSFILGTANTDLQPLNDLMVAAEQAGQSGLALQKIETEWLAQAHLQTFDDAVVDRIRATTQVGQEALITRYLTASKGKSNSQARALAREQLGEDVQWDWESARTREGFYRYQGGTACAVNRANSFAPFADVLWME…
g609.t1	OJJ77442.1	OJJ77442.1 hypothetical protein ASPBRDRAFT_112425 [Aspergillus brasiliensis CBS 101740]	Aspergillus brasiliensis CBS 101740	98.6	369	5	0	1	369	1	369	4.22e-257	709	MLLLDSLPNSISTDYPWVSSPLIVSAPMAKVAMPKLAVAVSKAGGLGFIAAGYHSDHLEDLLEEAEDLLQEGQTDTAVEETANEVPTFLPVGVGFITWSASLEKALPSFARYCPAAVWLFAPPNGFQDLIPWTTTIREATASRTKIWVQVGSVSDAVKVVNTIDPDVIVVQGLDAGGHSLARGASIVSLVPEITDTLRQLRPYHPQKKRAHVVAAGGISDGRGVVAALALGAEGCVLGTRFLASPESMVAHGYQRAILDASDGGVSTVRTTIYDKVRDIHGWPAGYDGRGLINRTYLDHLAGLSEVKNRELYREALNQGDIGYGPQGRLTTYAGTGVGLIREIMSAGDIVKSMREGARKILNGHLQAKL
g610.t1	OJJ77443.1	OJJ77443.1 hypothetical protein ASPBRDRAFT_166267 [Aspergillus brasiliensis CBS 101740]	Aspergillus brasiliensis CBS 101740	98.1	522	10	0	1	522	1	522	0	988	MTSNTAGTASTGSTVHMNHDRIESPVDTPNFIDNEFRPSQATKWFPVHDPATNNLVTRVPQSTPEELAAAVTSSQNAFPAWRATSIMARQQILFCFTHLIKENWDRLAASITLEQGKTFKDARGDVLRGLQVAETACGITTQLPGEVLEVARDMETRSYREPLGVVAAICPFNFPAMIPLWCIPIAVVTGNTMVLKPSERDPGAALILAELARAAGFPKGVLNIIHGSVDTVNFILDEPAIRAISFVGSNRAGEYIYSRGSANGKRVQANLGAKNHAVLLPDADHNAALDAIVGAAFGAAGQRCMALSVLVTVGDDADSIPALIEKARGLVVSAGFEKNADVGPVISPESKAKIESLIASGEHEGATIALDGRGYKSEKYPHGNFVAPTILTNVTPNMQ…
g611.t1	GCB27421.1	GCB27421.1 protein alcS [Aspergillus awamori]	Aspergillus awamori	66.7	537	95	4	1	459	1	531	1.08e-236	674	MSAKPTNTQIEGDTEMLSHMPTKDSIMLPIPRDTFEKLYLTPKMPIAGKLRQTFGNPTPISLMGFLVSATPNAMIHMGWRGAGGDGGAILPAYIAFGGMTQIIGAIGEWLIGNTFSCAIFFTYGKAFPTGAFWLAYGASLMPFFAVGARYFPTGNSFEGMETAEYHATAAVHFTTALGQEALAAKVEVISLLLYQCVMLVGQLFLIAHEGPRGEFCDSQELFASIRALYDLDWETRPLIILQALILMTFFPQKVTEPKGQAYFVRHAVSIAYNVGLHRDPTSFYSEASVHHFRKRLWWSVFIRERTLLLGEGTPWMIDDTDYDVPMIEIDAFCLPDVCHNVGTQSPLVDVNYITRQRKMAIMWIERAKLAVIMGRLSPLSIRIPESNSSIAERPVLQSG…
g612.t1	OJJ77450.1	OJJ77450.1 hypothetical protein ASPBRDRAFT_654832 [Aspergillus brasiliensis CBS 101740]	Aspergillus brasiliensis CBS 101740	83.7	429	13	2	53	424	11	439	1.06e-247	691	MTWIDFKSNTQLGVTSSPAASQAFSIGWGSLQYSIITEHSPALYNVFRFVYLGCRMLIDFHDLGSYNTPDQVYPSFPFVRPRGDEPPSEFHHLLRRCPVSHVELWDRSHPWLVVKHEDVRDVLTDPRLSKVRQREGFPEMSPGGKEAAKNRRTFVDMDPPDHTRQRDMVSGFFTDDYVAKLLPFIQETVQRYLGELIEAQKGRKVVDLVKYFALPIPSKVVYKLLGIPKEDFEYLSSCSATRSNGSSTAAAAQHANQELLEYLEKLTDKKIVKQGNDIISTLIVEQLKPGYLEKLDVVQIAFLLLVAGNATMVSMICLKIKAGEGIIASNQAANRDPDVFPDPDTFNMFRKRGSEEGLGFGYGVHRCIAERLARVELETVFSILFQTIPDLRLAIPKER…
g613.t1	OJJ77451.1	OJJ77451.1 hypothetical protein ASPBRDRAFT_190758 [Aspergillus brasiliensis CBS 101740]	Aspergillus brasiliensis CBS 101740	98	551	11	0	1	551	1	551	0	1085	MAIKEHPEDLDKSSAVHDEHADAHALVLLSSEVKYDDGDFRDLVHDPYTFGAALLASFGGFSFGYDQGVMSIILVMSQFREQFPETSPDHAHYGFNVGLMTGMLELGAFIGCLFFPAVADRISRKWGLTVATFFFVVGATIQTAAQDYATIVAGRFIGGIGVGTLAMGAPLYISEISPPAWRGSFLVLEAISIVTGAIVAYWISYGTRSIPSDWAFRLPFLLQMFPALVVGIGIHLFPFSPRWLAMRGRDQDSLKCLAKLRRRSPQDDKVQLEWKGILSEVRFQQALLEKEYPDHARHPLLVGFKQWVDLFRPRYLKRTLVALAIPFFQQFSGINAFVYYAPTFFEALGQSNSNSLILSGMVNVCQFVGGIPIMLYLDRVGRRKLAIYGGIAMAIPHLV…
g614.t1	OJJ77452.1	OJJ77452.1 hypothetical protein ASPBRDRAFT_654852 [Aspergillus brasiliensis CBS 101740]	Aspergillus brasiliensis CBS 101740	99	765	8	0	1	765	1	765	0	1518	MHSIPALLSLLGGLALTSAAPIQNITSDAYFYGQSPAVYPSPEGTGTGSWAAAYEKAKAFVAQLTDEEKVNLTAGVSSKTGCSGFIAEIPRLNFSGLCVSDASNGLRGTDYVNGWSSGVHVGASWNRTLARDRAKYMGQEFHRKGVNLLLGPVVGPLGRVAEGGRNWEGFSNDPYLTGALVYETVQGVQSSGVGVSTKHYIGNEQETNRNPETINGVEVASVSSNIDDKTIHELYLWPFQDAVLAGSVAIMCSYERINNSYACQNSKTLNGLLKTELGFQGYVITDWGAQHGGIASANAGLDMVMPETTLWGSNLTTAIANGTMEASRLDDMATRIIATWYQLNQDTDFPTPGVGMPASAQSEHQVVVGTSPDEKSTLLESAIEGHVLVKNRNNALPLQ…
g615.t1	OJJ77454.1	OJJ77454.1 hypothetical protein ASPBRDRAFT_166282 [Aspergillus brasiliensis CBS 101740]	Aspergillus brasiliensis CBS 101740	92.7	819	46	6	602	1413	1	812	0	1498	MPSDTPQGPTSTGRESPNNNCISVDALIVGAGFGGIYCLHELRKLGLRAAIFDAASDLGGTWQWNRYPGARVDSEVPEYQFSIPETWANWNWSTNYPACDEIRRYFEHVEKVLDIKRDCFFNTVVVAAEFDPTAARWDITTADGRHASARYFIVATGFAAKRYVPEWPGMESFRGDIHHSASWPEDGVDVKGKRCAVIGTGASGVQLTQALGPVASSLKVFQRTPNLAIPMRLRPLTVEDQERLKPLYPELFRLRETSFGGFNYDFIERGVFDENEKEREAFLEQLWEKGGFRYWVGSYWDYLFDAKASRVIYDFWARKVRARIDDPVKRDVLAPLEPPHPWGVKRPSLELSYFDQFNRPNVDVVNVRDNPIDSFTEKGIRLADGTEHEFDVICVATGF…
g616.t1	OJJ77455.1	OJJ77455.1 hypothetical protein ASPBRDRAFT_190761 [Aspergillus brasiliensis CBS 101740]	Aspergillus brasiliensis CBS 101740	97.8	3913	85	0	1	3913	1	3913	0	7538	MDTPLLSSSETSSPRFSNAVPSSVSSMTPNADPSVIVGLACRVPGATNPSQLWENIVAQKDLQRKMPSDRFNVDAFYHPDGTNKGTTNAKYGYFLDQDIGMFDAGFFRISGKEAEAMDPQQRLLLEVVYEALEDAGITLDEVNGSNTAVFCGSFTNDYNAMVTKDLEYYPKYTVTGTGNAILSNRISYFYNLHGPSVTIDTACSSSLVCFHLGNQSLCQKESDIAIVVGSALHFDPNVFITMTDLGMLSSDGRCRTFDAMGSGYVRGEGICAAVLKRRRDAVYNSDNIRAVVRASGVNHDGIKQGITLPNTDAQEKLIRRTYDLAGLDPCDTQYFEAHGTGTARGDPIEARAIGAVFGSTRPQPLYVGSVKSNIGHLEGASGLAGIIKATLALEKGQIP…
g617.t1	OJJ77456.1	OJJ77456.1 hypothetical protein ASPBRDRAFT_50336 [Aspergillus brasiliensis CBS 101740]	Aspergillus brasiliensis CBS 101740	99.8	434	1	0	1	434	1	434	9.92e-314	858	MSHDQRSPSEEVSMTALSKPASELTIVGDGHHSLPAKDTSTRAWLVVVGGLLIYFPTFGFLNAFGTFQTFYLQDLLAGTSSSKIAWIGSLQIFLLFIGGLVVGPLYDKVGATKLLVPGSVVYVVALMLTSVCKKYYQLILAQGILFGCANALLFYPTIAAINQWFDRRRGIALGLAVSGSSLGGIFWTEIIQLMLDHIGFGWTVRACGFISLAFLIPSCVLIITRPPEPGQSKDMQLDFKAIFTDAKYLLFSVGMLLVLWGMFIPFFYLPSYGETYGMTVTGANNLLAYMNAGSFVGRVLTGLMADRMGRFNVISLAALSCGILLFCLHKITTSGAIIAFSTLYGICSGGLISLQSACIGQITPDHSIIGVKIGLMMGFCSVGGLTGSPIAGALLSADH…
g618.t1	OJJ77457.1	OJJ77457.1 hypothetical protein ASPBRDRAFT_112826 [Aspergillus brasiliensis CBS 101740]	Aspergillus brasiliensis CBS 101740	98.7	475	6	0	1	475	1	475	0	961	MWRIPVIVALVAGLLYWARKQASKPSREIPQPRIGLPVVGDAQAFGKSPISYIRQATARCGPVFRINLLLTNIIILRGAQLNRFYLDTREEVWSFGDGMGLFLEKVVVPGYLSHLKEMVSSLNRGVNRSIALEHYTRIAGEEARKIVIDWTEKPDIEVFEQMSRYTHRVIVRCLMGQDFYDHHLDELLDLLHRMEADIGHPFHFLLPNWVPHGPARRLHQARDRMAAIFNERLQAREQNPEKWQDSLDYIAYTLNDSRTAHLRHYFAAHHTLLMFAAHTSTVASIAWTVLELLRNPTHLKALKAALETDLDVHRSPTLIATLKETSRRYSGVNMIRWARQPHQLPPNAAPGMGSIVVPDNCIVSISPYLTHHDPETYAYPQTWDPTRWLESGRPSEAQK…
g619.t1	OJJ77458.1	OJJ77458.1 hypothetical protein ASPBRDRAFT_50338 [Aspergillus brasiliensis CBS 101740]	Aspergillus brasiliensis CBS 101740	97.9	373	5	1	1	370	1	373	1.86e-259	715	MSPSTPNPDSSPLHTYYFSMVEMSIMKLFLDHKIFTLIPTTPGTSIPLSTITTTLNASPSLLTRLTNFLIASGVLSSPSPGHIAHTPKSLQFTDPTSYQALFFAHIFDFFLVPAVKWPGYMAGHGLNEPTSASRTPFGYAAGYPDKTLYEILEMMPERAAQFNATMAASFQPMPVLGMYDFSWIEKIPDGEDGERVAIVDVGGGKGQALKEILRAYPGIRPERCVLFDVEDVIREAVAEAEAEDTNEEKASWRAVRKIPGSFFAEQPVKGAAVYHIRRVLNDWPDEDCVTILRRIKDAAAPDSRVLISEQILQEQPSLAVAALDLWMLNFGGKRRSESMFGEIAQRAGWKVNGVFRDKESDTGVVELVVA
g620.t1	OJJ77459.1	OJJ77459.1 hypothetical protein ASPBRDRAFT_36679 [Aspergillus brasiliensis CBS 101740]	Aspergillus brasiliensis CBS 101740	99.9	867	1	0	1	867	1	867	0	1679	MAKKAELRRSCTFCRARKIACSGERICNACRSRSIECVYDLEIAKGRPRLNKTTSTRASMSAGPAGPSPITLEDGEPGDGGHSITSAANPDATRLTGVMAELEVMFRENFGEDPMAAPSNQFQDRVARFNRNLAAGRASQGPSTPAGSLSYPGFLALLMQDLAETVTGKFGDLGCHPFFGPGERFYRACMLQDTTKTMFDTACLPSPSSSTPSGGEADILADYNSHLITQHLEVWMSNHPLSIIISKSLLLRDLRSQTANRVLLAVMLADAHHFADNSAKGDCLLQWAISQLSNIPAGQEDLTTAQITLLLGWFHVCRGHSRRALCYVGYAGRITTKLASQLHESPLTGQTHINGIDRGAVEAEMIHHMYWVMLALTVWSFIQMDMPLADLLPAQLLQV…
g621.t1	OJJ77460.1	OJJ77460.1 hypothetical protein ASPBRDRAFT_25128 [Aspergillus brasiliensis CBS 101740]	Aspergillus brasiliensis CBS 101740	97.7	432	10	0	1	432	1	432	0	865	MSTQVLIVGGGIGGLTLATMCRRIGVSCQVLERSAVLEPVGAGISLAPNALRALDQIGLYDYVRQEGQPVRKIRVYRNQTQWSEIDFQWLERTFGYPVYSIERHGFHRRLYDAAGGSETVILGAEVAKVIPPQEKAEGVSVVLKDGRRYTGNVLVGADGVRSVVRRALMATIDSPPEQSGGAGEDEDAADVIQFTGRVHLSGYTHPLDHLGPADEGIAHWMLYDRSILTTWPCKDHRQWFVGAVLSKLKDPNRSVWKHADHNTINQVYGSEYHPFAPDFHFRDVVKHAERVVASDVFHQTTFPPMAAGRIALLGDASHAMTSFFGQGACQAIEDATELASALGMIDARPTDAETILQGYRQSRERRGRDLVEFSDRFALLHTGRLLGSWGPFVRQMVYT…
g622.t1	OJJ77461.1	OJJ77461.1 hypothetical protein ASPBRDRAFT_202428 [Aspergillus brasiliensis CBS 101740]	Aspergillus brasiliensis CBS 101740	97.8	414	9	0	1	414	1	414	9.03e-309	843	MSPGSRICSLLVAAVTASAVPTSLATRHLQSVDLPLTRSSYGFLTDIALGTPGESLPYLVDWTWTGHYVVTTLCYNDPTATYDCLNVDQKIFNQTLSSTFINQTDQYGYLYWDPNHFYFTEPAAADVATDMLRIGPTAVNTTIQAANFVFNETISAFPFSGVYGLSPVFKGDNRSVQASFYQGWKSGAWPSPIVSFIYCHDNATKAVCSGHDGIQTLGGYNTSHVHGNITWYDIIVTEAINTLDFVYAPAVINYWALNLTRFSIGDEEQQLNQTATLDGKQAAVAAFDHASYGRGAPMSVYGYQRLVELVGAKAVTLSDPPNNGEQGFYQFDCRNSSSLPPLRYEFAGSKRVWEIAPENYVEVLTNGTNKCTFNVRTLGDGAMVMGNFGETFAIDKYIM…
g623.t1	OJJ77462.1	OJJ77462.1 hypothetical protein ASPBRDRAFT_50342 [Aspergillus brasiliensis CBS 101740]	Aspergillus brasiliensis CBS 101740	91.7	302	23	2	1	301	1	301	6.64e-181	511	MEPILHIQGDAHSSLTPLILIHAVSGLAWPYMALGNLSSTSDSAKSRPVYGLSSPVYGVSRYTLPSSLEEIAKEYVERLQTELQLHGPYLLGGWSMGGMIAIKMAEILQAKKETVQHVILLDSINPEKYPAFVNEEEHRIIADSLYTNVCQAMGMASLADNSDDDDNRSDVSAASDDGSSMSDEEEDDNLDRLFSTMRRHIHASTLFIASTEPGKLLQPNSVCHTSVTLVKCTQLSETVPALYSARQRWIRRCALHPTLQWRPQNFDRFRTLLIDARHDSLFDEEHVEEVTNILRQILAAC
g624.t1	OJJ77463.1	OJJ77463.1 hypothetical protein ASPBRDRAFT_36683 [Aspergillus brasiliensis CBS 101740]	Aspergillus brasiliensis CBS 101740	93.8	292	9	2	1	283	1	292	1.23e-192	539	MTKPTIAFLGATGGCINACLAHTLQNGYHAVALARTPSKLTALLRSQNIDQEILDSRLRIVTGDATDPEAVKNTLLLQLASPTDSTSTSSTSSSPPLVSHIISGIGATGHLRGWCFEFDQPHICEEATRALLTALRNIYTTYHPELLLSANVKARPLLTVISGMGVDPSQKQMDVPFLLRRVYHGLLHVPHADKWVMEEMLAKREAKELFRGVVTVRPGSLLTGDHMLGSGYGYEKVRVGTEREKPSVGWTIPRADVGEWVFREVVVIGGGRWVDEKVTLTCW
g625.t1	OJJ77464.1	OJJ77464.1 hypothetical protein ASPBRDRAFT_70855 [Aspergillus brasiliensis CBS 101740]	Aspergillus brasiliensis CBS 101740	97.4	541	14	0	1	541	1	541	0	1061	MRISARSIVWSALLACTTPALGEAAATASNSTQSLRACISQALVAGDVNARIVDPSNDIYTDARLGEKIQFNEFPALIAYAKEADEVASLVRCAQRSGFKAVPRSGGHHFEAWSALNGTLVIDLSHINHVNVSADTTTATVGAGIRQGALYLALDEHYVTFPGGICPTVALGGLVSSGGFSLQMRALGLAAEYVQSARVVLADGSLVTASSSSHEDLFWAIRGGGGGTYGIIVDLDLQLMQFPTSAMVAISWNASSDRYPVAQRFFDWAPVQIPAFTSQVNVYKSSINFLGQYLGGTENELRKLINESGLLDIGTPTVYISGNCDTDNSRLFGYTSYECVPANETNRQIMNVLPEPFSQYDDYPQYQYENEPEDPSITIAEPWARFNRISKSFFMQKDN…
g626.t1	XP_026629758.1	XP_026629758.1 hypothetical protein BDQ94DRAFT_167608 [Aspergillus welwitschiae]	Aspergillus welwitschiae	90.2	122	12	0	1	122	1	122	1.39e-76	232	MKFFAISALLAATAMAGVVPQNYQWISHNGPSNSGLTRSHAQNACGTNNVRCCQGFSPEHGLSRQDESRFRNGLGEGVPGELQGGNNCGPCGNDEGARSVACCSEGSNNLISLPCIAIGRLI
g627.t1	OJJ77466.1	OJJ77466.1 hypothetical protein ASPBRDRAFT_25134 [Aspergillus brasiliensis CBS 101740]	Aspergillus brasiliensis CBS 101740	99.4	624	4	0	40	663	139	762	0	1235	MAVISKAWKVGSSIWRALAPVTTAGKEAPYNIMMPRAKCRSIVSVTTTNADHLSPAGSTSQCTPKANPHLVTRHTAYPDRNSLDQSLQLKDPTDSVNAMMGAVEDERPTQGFFGSSSAASFIRQIKTAIDKKVSSPNRHTSDSILGVGPPSSLMSTKKPRLSTVPNYVLPPRKTADSLMEVYWEFVFPLYPLVDSLQLRREYERIWTGEALQSDENMLMCTVNVIFALACQLADFIPPEEREASADAFFTRAKDLLQFNLWNTGSAALIQCLLLMAQYLQSTDSAHQCWIVTGLAIRNAQGLGLHLPQTIARLHNPQEQQLARKIWHGCVLMDRVISMTFGRPAMISKASCGSVPLPATVDEEYIPAVSGSEVTQPADRPSVMAFYAKSLELYEILNDI…
g628.t1	OJJ77467.1	OJJ77467.1 hypothetical protein ASPBRDRAFT_166308 [Aspergillus brasiliensis CBS 101740]	Aspergillus brasiliensis CBS 101740	95	523	3	1	1	500	1	523	0	998	MAEEVSLGTNMARSDTLKKNGHEEVHLENVSPTPPDQQSNRNLWTDSSPTNPQNWPVWKKNAHILMVAFHSMAATFMAAGIIPAYDIMAERYNVTVPQASYLTSVQILLLGICPLFWKPITSTYGRYHVFLFSVLGSMVCNIGGARCTTYGTQMATRVLTALLISPPIGIGSGVITELCEPEERAQKLGWWTLMLTLGTPCGPFIMGFVTKHIGFEWIYWIFAMMNFGQFIAYLLLGEETLYIPTDSNTYDAGVVKPSFAQKFIPRRINPRPLKLREFIEPLLFTRLPRVLIPACAHSIVFCYGNIALIVEMPIVFGEKFDFDSQQIGLQFIAIIIGCVLGEQLSGPISDRFLQVMHRRRGYHRPADRLWLSYIGFGTVIAGLLVWGFQLQKATSWNVT…
g629.t1	OJJ77468.1	OJJ77468.1 hypothetical protein ASPBRDRAFT_190774 [Aspergillus brasiliensis CBS 101740]	Aspergillus brasiliensis CBS 101740	98.2	663	12	0	1	663	1	663	0	1338	MRFLSPLIPTSLLISLTTATLHTSQTNTTITLTNNRLTANFSKSQGRITDLYLDNQDLLGPQSGDTGVGPYLDCYCIPSGFYTPGSTSSTLQLFTGTDKTGTHYAGVLMDETYPPTGQHFQQYWFLRDGETGLHTFSRLAYYNETTPYLRNLQEFRTLFRPNTELWTHLTSSEVQTAPLPSKKAVEEEVVVQDATWTFNNTPTDAYYTEFADYFTKYTFSNAWRDNSVHGMYADGSTSNGSTFGAWLVMNTKDTYYGGPLHSDLTVDGIVYNYLVSNHHGEGTPNITYGFDRTFGPQYYHFNGGKGSTASLQELKADAETLADPSWNIDFYDSIAEHVVGYAPSSQRGSVQGKIDLPKGATRPIAVLTVDGQYFQDNSVNSSAYQYWAEIDNSGRFSVE…
g630.t1	GAQ41981.1	GAQ41981.1 acyl-CoA dehydrogenase family protein [Aspergillus niger]	Aspergillus niger	99.8	511	1	0	1	511	1	511	0	1026	MSKTFTRAEVAQHNTEDSVWCIIDHRVYDLTDFIDAHPGGSVVLNQVAGTDATVDFYNLHRQEVLEKYKDLCIGTVAGETPEIVTPEPGSLSQVPYAEPLWLRPQFKSPYFNDSHRRLQKALREFTDRYITPEAQEKEKDGTYISQELIDRMAEAGILAMRLGPGKHLHGRKLLGGVIDGKEFDYLHDMVLSQELVRSNARGFQDGNMAGMCISLTAVQQWLRNEPLRQKITDEVLSGKKKMCLAVTEAFAGSDVAGLRTTAKKTPDGKHFIVNGTKKWITNGMFCDYFVTGCRTEKGFSVLLIPRDEGVETKQIKTSYSTAAATAFVQFENVKVPVENLLGEEDKGFIVIMSNFNHERFMMVCSVVRMCMTVVEECMKWCNQRIVFGKKLIEQPVMRQ…
g631.t1	OJJ77470.1	OJJ77470.1 hypothetical protein ASPBRDRAFT_36688 [Aspergillus brasiliensis CBS 101740]	Aspergillus brasiliensis CBS 101740	97	364	7	1	1	364	1	360	2.42e-232	646	MTERTDSLSANSVLTIAATALRGNGAAPPSLKTPYEAIALVGHASMTAVGFRLVGLGEDHTLENQSDSPSLPAEWNANTAFAFRYAHSQSSMQYLLKISRIGNNAVVFALALGDDKTTSFDLPVKDYVSESALPVSSTAEDLPAALCEAFISPSRLQDLVGLFKINVIQKLAPGLYKEGYEGTSDQPQETLRERTLERPPRHDPLRDDPMPQPARPYPFDDPLAVPPRRPIPAGDFPPPGFEDEFEIQRPPRGYPGGTGGRNPLSIGDHDLYPAGLGPHDPLRGGVGPGLGGGGGGGGGGGMHPTFDDPLFGGPRGQGYDPQAPPGSRYDPVGPGQGAPFGRGQGPYGGRGFGGGFGGFGGDII
g632.t1	XP_001394046.1	XP_001394046.1 serine/threonine-protein phosphatase PP2A catalytic subunit [Aspergillus niger CBS 513.88]	Aspergillus niger;Aspergillus tubingensis;Aspergillus awamori;Aspergillus niger ATCC 1015;Aspergillus niger CBS 513.88;Aspergillus aculeatus ATCC 16872;Aspergillus brasiliensis CBS 101740;Aspergillus luchuensis IFO 4308;Aspergillus luchuensis;Aspergillus luchuensis CBS 106.47;Aspergillus welwitschiae;Aspergillus niger ATCC 13496;Aspergillus neoniger CBS 115656;Aspergillus japonicus CBS 114.51;Asp…	100	329	0	0	78	406	1	329	1.37e-255	705	MKNRVKLWLRKAGGVAHRLGRAQFGFAPPDQLKIHAFLSRDLPSPVGPAPPPLGCNHLELALFPPTTFLLTSGGHYQMDNNMEIDTARSPEPHHLSPTTDPGSIPTLDGWIESLMTCKQLAEEDVRRLCDRAREVLQDESNVQPVKCPVTVCGDIHGQFHDLMELFRIGGPNPDTNYLFMGDYVDRGYYSVETVTLLVCLKIRYPQRITILRGNHESRQITQVYGFYDECLRKYGNANVWKYFTDLFDYLPLTALIENQIFCLHGGLSPSIDTLDNIRSLDRIQEVPHEGPMCDLLWSDPDDRCGWGISPRGAGYTFGQDISEAFNHNNGLTLVARAHQLVMEGYNWSQDRNVVTIFSAPNYCYRCGNQAAIMEIDEHLKYTFLQFDPCPRAGEPMVSR…
g633.t1	OJJ77472.1	OJJ77472.1 hypothetical protein ASPBRDRAFT_166322 [Aspergillus brasiliensis CBS 101740]	Aspergillus brasiliensis CBS 101740	99.8	488	1	0	1	488	1	488	0	1009	MPSTSDLADPKEYQKIFHWAETQKDGAIPSFATRRNDPYEYQAGFGNSFASEAVPGTLPQGQNSPRNVRFGLYAEQMTATAFIAPRHCNKKAWLYRARPAVAHQGFTDLPDNKDTEANFLPLNPRVHVSPTQLAWHPFDIPTSGEVDFVSGLKTVAGSGEPTLREGLATHVYVANASMTKKAFVNSDGEMVIVPQQGALDIQTEFGPLFVQPGEIVVIQRGIRFRVELPDGPSRGYILEIWGSQFELPELGPLGANGLANARDFLFPTAKYEISKEPWEIVYKLGGKFFKSTQNHSPFDVVAWHGNYVPYKYDMTKFVNVGSISVDHIDPSIFCVLTAKSRDTTAPLADLLIFSPRWDVASHTYRPPYYHRNAASELMGLIYGDYGGRSDAFQPGSVSF…
g634.t1	OJJ77473.1	OJJ77473.1 hypothetical protein ASPBRDRAFT_190779 [Aspergillus brasiliensis CBS 101740]	Aspergillus brasiliensis CBS 101740	99.2	501	4	0	1	501	1	501	0	999	MASPQVQHQGLRATFKGIERESNGITVNEFRGIKYASVPARFERAQPVGDFNDAVVDASHYGPRCPQVDVDVRHLLRIPEDFPIEKEPEDEFECLNLDITCPPAASAQGPLPVLLWIYGGSQVVTFCSAASKICDPIKIVADSIKSGQPIIFVSINYRLNIFSFGDGKEKNLAVKDQKLGIEWVRNNISAFGGDPNNITLAGESAGAVYTHAHLVTGTPVKRAVLASGSLYLSSPLPIEKGQGLIKVLEAKVQELGQPSLRLSSVPALLQALKESNVNTMWIQEDEDFQGWENKSELVDELMIGDTEYESVIWRNGIETFDGEAIASAFEQDEKWGTKLRKMYQVVADRPTACKLGALDFVNDVRYTLPVEVVAEKLQAAGKRVYKYVVDQANPWQASS…
g635.t1	OJJ77476.1	OJJ77476.1 hypothetical protein ASPBRDRAFT_112110 [Aspergillus brasiliensis CBS 101740]	Aspergillus brasiliensis CBS 101740	95.8	551	21	1	1	551	1	549	0	1031	MAEAFPSALVGPSSKERKYDRQLRLWAASGQQALEESRVLLVNSDEAWGKHNTGVTGVVGVETLKNLVLPGIGGFTIVDPALVTEPDLGVNFFLEEESLGKSRAEETCRLLRELNPDVDGNFYTKPITELLKDPEFLPQHKLVLVSGPVKRPSLEAICKAAKEFGIPVIYTRSVGFYSTFSVQLPAAFPIVETHPDPESTQDLRLLNPWPELAAVGASIRNLDSLDDHQHGHVPYILLLLHYLEKWKEAHDGQVPSNYKEKSEFRELVRSSARTSNPEGGEENYDEAVAAVLKSLNPFSLRSSLREIFEMEECKRPGPDSANFWIIAAAIREYYQRHSVLPLPGSLPDMKAQTADYVSLQNIYKSKARKDLEEVTKIVRSLEERLGPRPAPASDKDIEV…
g636.t1	OJJ77477.1	OJJ77477.1 hypothetical protein ASPBRDRAFT_36695 [Aspergillus brasiliensis CBS 101740]	Aspergillus brasiliensis CBS 101740	100	273	0	0	1	273	1	273	6.19e-188	526	MASVVEAAKRAAGKAAVENHYPKDAKYVGIGSGSTIVYVVEAIKESGIDTSATKYVPTGFQSKQLIVNAGLTAVDFDALPEGTVLDVAFDGADEVDDELNLIKGGGACLFQEKIVALQAKEFICVADSRKLQSRLLTGWKYIPIEVAPIAARRVLGALKEIGSIEPAVRMNADPKQGPLKTDQAFFLIDAPFKTLLTQADVAAGKDGSGKDGVWEVHALSKAIKQIPGVLDVGIFSGVTGPQAQALGGVGGQKPIAAYFGMPDGSVSVRKATA
g637.t1	OJJ77478.1	OJJ77478.1 hypothetical protein ASPBRDRAFT_166337 [Aspergillus brasiliensis CBS 101740]	Aspergillus brasiliensis CBS 101740	99.4	354	2	0	1	354	1	354	6.95e-253	697	MASHQFSVASPPTDAISALKFSPDPDSTRIVVSSWDKNVYLYDLRDENGAVGEGKLLQKFEHRAPVLDVCFGATEDEIYTAGLDWDVKKIDVASSTQTVLSSHEAGVRSVVFSKEHNLVISASWDSTLHVHPTNDPATAPAIIPLPSKPFSMSLTATKLVVAMASRALHIYDLKALAMLTAQSEDTGPNKLEIEPWQRRESSLKFMTRSVACMPDDAGYASSSIEGRVAVEWFDPSAESQARKYAFKCHRQTADDVDVVYPVNALAFHPVHGTFASGGGDGVVALWDGIAKRRIRQYQKYPSSVAAVDFSGNGKYLAIAISPGFEDGKDDVVEGTVKIFVRELGETEAKGKGAK
g638.t1	OJJ77479.1	OJJ77479.1 hypothetical protein ASPBRDRAFT_190784 [Aspergillus brasiliensis CBS 101740]	Aspergillus brasiliensis CBS 101740	100	355	0	0	1	355	1	355	4.73e-256	705	MPFAQLVIGPPGAGKSTYCNGMHQFLGAIGRKCSIVNLDPANDKTSYPCALDVRDLVTLEEIMSEDQLGPNGGILYALEELEENFDWLEEGLKDLGEDYVLFDCPGQVELFTHHSSLRNIFFKLQKMGYRLIVIHLIDSYNLTLPSMYISALLLSLRAMLQMDLPHLNVLTKIDNLSNYAPLPFNLDYYTEVQDLSYLLPHLEAESSRLSHEKFGPLNNAIIDLVEEFGLVNFETLAVEDKKSMMNLLHVIDRASGYVFGPAEGANDSIWQVAVREGLGQMDIRDVQERWLDAKDTYDEHELKELEKEAKAAEQQAAEGASEQKPTPHPDFDDDEYDDLGRGSIPDGGVKVIRKS
g639.t1	OJJ77480.1	OJJ77480.1 hypothetical protein ASPBRDRAFT_112899 [Aspergillus brasiliensis CBS 101740]	Aspergillus brasiliensis CBS 101740	95.8	216	8	1	1	215	1	216	5.09e-127	367	MVRLKHRYLLLDILYPDPSTWPAATSATAPTSRTKNPPPSSKSKSQAQLQIHSPTSDALTPGLLAKMVREEVALMFGDYGVGRLGGAGAGSISVKYLSPATSTAIIRCPRAAFRIVWTALTCMSQVPGFSEPGSKRTNTTRSCVFRVIRVSGTMRKAEEEAIRRARREIVRLREAEETGVLEGLLGGLVDAQESTPLTTEGEDVVEDVMMESEDE
g640.t1	OJJ77481.1	OJJ77481.1 hypothetical protein ASPBRDRAFT_113236 [Aspergillus brasiliensis CBS 101740]	Aspergillus brasiliensis CBS 101740	100	656	0	0	1	656	1	656	0	1297	MPTSAPLVNTANGASANDNITRFDPPSRVRSPLSNALFHNKTRCFVYGMQPRAVQGMLDFDFICKRSTPSVAGIIYTFGGQFVSKMYWGTSETLLPVYQDVSKAMAKHPDVDTVVNFASSRSVYSSTMELMECPQIRCIAIIAEGVPERRAREIMVTAKEKGITIIGPATVGGIKPGAFKIGNTGGMMDNIVASKLYRRGSVGYVSKSGGMSNELNNIISQNTDGVYEGVAIGGDRYPGTTFIDHLLRYQAEPECKILVLLGEVGGVEEYRVIEAVKNGTITKPIVAWAIGTCASMFKTEVQFGHAGASANSDLETAVAKNKAMREAGIFVPETFEDLPQTLKQVYEDQVNKGIVKPQPEPVPPKIPIDYSWAQELGLVRKPAAFISTISDDRGQELLY…
g641.t1	OJJ77483.1	OJJ77483.1 hypothetical protein ASPBRDRAFT_113999 [Aspergillus brasiliensis CBS 101740]	Aspergillus brasiliensis CBS 101740	99.8	485	1	0	1	485	1	485	0	963	MSAKSILEADGKAILNYHLTRAPVIKPTPLPPSSTHNPPPKLASLHFPEDVAVKDVLDQAEVVYPWLLTPGSKFVAKPDQLIKRRGKSGLLALNKTWAEAREWIEARAAKDVQVETVTGVLRQFLVEPFVPHPQETEYYINIHSVREGDWILFTHEGGVDVGDVDAKAEKLLIPVNLKNYPSNEEIAATLLSKVPKGVHNVLVDFISRLYAVYVDCQFTYLEINPLVVIPNADATSADVHFLDLAAKLDQTAEFECGTKWAIARSPANLGLPTLPSSDKVNIDAGPPMEFPAPFGRELSKEEKFISEMDAKTGASLKLTVLNANGRVWTLVAGGGASVVYADAIASAGFVSELANYGEYSGAPTETQTFNYARTILDLMLRSPIHPEGKVLFIGGGIAN…
g642.t1	XP_001394059.2	XP_001394059.2 heat shock protein [Aspergillus niger CBS 513.88]	Aspergillus niger;Aspergillus tubingensis;Aspergillus awamori;Aspergillus niger CBS 513.88;Aspergillus luchuensis IFO 4308;Aspergillus luchuensis;Aspergillus luchuensis CBS 106.47;Aspergillus welwitschiae;Aspergillus niger ATCC 13496;Aspergillus vadensis CBS 113365;Aspergillus eucalypticola CBS 122712	99	103	1	0	1	103	1	103	1.10e-64	201	MSFLRNVKSLAPLLDRVLVQRVKPEAKTASGIFLPESSVKEQNEAKVLAVGPGVFDKNGQRLPMSVAPGDRVLIPQFGGSAVKVGDDEYTLFRDHEILAKIQE
g643.t1	OJJ77484.1	OJJ77484.1 hypothetical protein ASPBRDRAFT_70871 [Aspergillus brasiliensis CBS 101740]	Aspergillus brasiliensis CBS 101740	99.7	322	1	0	1	322	1	322	3.31e-177	507	MMMEDEDDDFYDPADAVPVTQHQNGSQHPPANSEPQDDNDAEEEEIEVEEDEDDFNIITEAPADAPPPEVPHPRHASLRAESQRPSSADVSTISKSITPTATPKLETATPVPAAARPAVPQKPGSAYPPVHASNIDVHANPIHPATGKPIMLTDMDTDFPEDDKPWRRPGSDITDYFNYGFDEFTWASYVLKQQELRKEIGDQKKQLDDMQAFLSMGLPPMPGGPPGPGGPSGSAPPPMPGMPGMPDMSQDMMQGMLTSMMSQGLDPSSMDPMAFMQHAQAMMGGQPGAGGGQQGQPGFGGQGGGQPQMGYGGGFGRGRGRRW
g644.t1	OJJ77485.1	OJJ77485.1 hypothetical protein ASPBRDRAFT_36703 [Aspergillus brasiliensis CBS 101740]	Aspergillus brasiliensis CBS 101740	99.2	375	3	0	1	375	1	375	6.17e-253	699	MSQSEQPSHSSTPRSFTSQTASAEDLLKSQTVGLVHLSDFRKRRAEVLEQKEREAHDKSLGRFTSGLSRSATPSTGEVTDGNSTPRSEGPPKKKKKKPITKSKLSFGDDDEEEGNDSTADAVATPRDSSIPRSASRTPVDDSSAPSSRRITPNPNAPPPPKAMTKAALKAEAEARDALRKEFLAMQEAVKNTEILIPFIFFDGTNIPAGTVRVKKGDPVWLFLDRCRKVGAELGVSGSSGASKARKDNRREWARVSVDDLMLVKGEIIVPHHYELYYFIANSVPDFTKAGGLLFDYSNKPPPRPSTDDPLSRPESSQLEGADKDPSLTKVVDRRWYERNKHIFPASLWREYEPGPEFEEKMRTTRRDASGNTFFF
g645.t1	OJJ77486.1	OJJ77486.1 hypothetical protein ASPBRDRAFT_166354 [Aspergillus brasiliensis CBS 101740]	Aspergillus brasiliensis CBS 101740	96.7	367	11	1	1	366	1	367	1.06e-251	695	MDFHLRCNSLKCREQLKERAVVTTCSHIFCLNCAGSLGLSQPAANERICPACQTVLVNPDDAVATVLNPSEDYKTSVLSGLDPNTIMECAGRALVFWTYQNSQEICYQEYLAKTLTDKYTNLNTQMDKVIHNANTEITALQARIKDMQTAQDQLRKKNHELVDMYREKCKKFTQVTNLYNILKSRAMRSQMQTAATDTVSQALGSLTTSRNDPPVLVPRPETSRLPHPPSSRHSNVFPVNQEGVEQLHRYQRSGTGSSKGNKQKTDVAAMPPPSRPIDNRSKHTQPAATAQHRTRLMGPTRPSTGKSYLPSESMMVERFQAEARSANALLDTRDSTGRDAGMQLPSQRHSPPGRPATDSFFDSTNI
g646.t1	OJJ77488.1	OJJ77488.1 hypothetical protein ASPBRDRAFT_190793 [Aspergillus brasiliensis CBS 101740]	Aspergillus brasiliensis CBS 101740	99	396	4	0	1	396	1	396	5.32e-301	822	MAPSLVDPVVTQPVGRLPIIKKETTEDNKFGYQPGRTVVENHDNYPYQDLLPTFPNLHWPPLEETPYEDRGLYGDAKFRNLLQDATDVFDYTPKIGTEVHGVNLAKLNDAQKDDLARLVAVRGVVFFRGQDDLDIDAQRDLGRYFGKLHKHATTSVPRREGLEDVHVVYTGDNSSDQRAMFTPSFLWHSDVTYEVQPPSYTSLKVLTGPPRGGGGDTLWTSQYAAYDALSPHMQTYLKGLTALHSADMQASDSRALGRPVRREPVTTEHPLIRTNPVTGWNSLFFNPGFVTKIVGIPKTESDAIIKYLTEVIATTQEMHARFQWNKNDVAIWDNRTTNHSASYGFAPHRRHAVRVCCHAERPVLDPAGKSQEEEFIALYNLPPVNKDGSRQSNYND
g647.t1	OJJ77489.1	OJJ77489.1 hypothetical protein ASPBRDRAFT_36705 [Aspergillus brasiliensis CBS 101740]	Aspergillus brasiliensis CBS 101740	91.6	479	38	1	1	479	1	477	1.50e-219	623	MFGTKPAGTSTGLSINTGSANSLFGSGTNTQTSTTTTPATTTTSGGLFGNLGNAATQSKPAGGLFGNAGGATQQSQPSGSSLFPGLGGQQSNTTSTGGGLFGNSTATTSQPQSGGLFSGAGTTTNTQSGTTGGGLFGNLGGNTANQTQPKPLFGGLGGSTATGGGLFGGANQTSAQQQQQQQSQKPTLSLFGNQNTTTQQTTQPTAAAAGTTVIPGVKVDISNILPTTKYESCADEIKSELEKFDNFVLNQIKICNEVANMIPTIASQGETIPNDVEFVQGKLETMQHALENDAGDIDQLRNLVSRDAAEAQVAFRAIDTLKLPLQYQSTGGAGWWSQDQKMSDGQALRTTRKNTLALPDDVESDPSTATSVNGVPVNLVDYFSQRSDEMGAVLERYTR…
g648.t1	OJJ77491.1	OJJ77491.1 hypothetical protein ASPBRDRAFT_654937 [Aspergillus brasiliensis CBS 101740]	Aspergillus brasiliensis CBS 101740	95.6	932	31	4	372	1299	7	932	0	1607	MTEGSEPICVASTRQSGDENGPGFGSHSPNSLDSTAIRPKDQRSLAQSPNTTYFKGAEWSADGTTVLTDSSDHHIRTWILPPDLLEEKTSPHSLSPYSVLPSAEPTYATAMYPFFSLQDPSTTLFLSSVRDHPIRLTSALAPTSVATYSLINPMTEAFITPHSMIYPSALGGSQFLAGSDSLISLFDISRPGNDGPVASMPTIPSKRKQLVGGGVGMKGIISAMALDPTGAGILAAGTFTRHVGLYGAHGTGESLGTFSIAKTEAHHHIGGRGITQLLWSPCGRYLYVAERKSDGVLIYDIRVTGQLLGWLQGRKAFTNQRLKIDVVPSGDNGSHEIWAGGTDGCMRVWQNPTHAAGAQAPKWEWKVHDDTPAVSGQGDPMSDFTFVNELADFTALFGD…
g649.t1	OJJ77493.1	OJJ77493.1 hypothetical protein ASPBRDRAFT_141272 [Aspergillus brasiliensis CBS 101740]	Aspergillus brasiliensis CBS 101740	92.8	293	3	1	1	293	18	292	3.16e-189	531	MDGLLIDSEDKYTDITNAILQEYGKPMLPWSIKAQLQGRPQPDYPLSTAPPSITPLTLPNQASRIFHHWAQLPISPEEYAAKQSALQEKFFPQSQPLPGVRELLAKLVSTQTTAQPVHLALATSSHSRNFKLKASHLDDLFSAFPKSQQVLGDDPRIGKGRGKPLPDIYLLALETINTNLRAKGETEITPEECLVFEDAVPGVEAGRRAGMRVVWVPHPGLLESYKGREEEVLAGLTGEHKEEEKTEPEREADELVSGRLKSAGKPGQIGDGLGELLPSLENFPYERYGIKPACN
g650.t1	OJJ77494.1	OJJ77494.1 hypothetical protein ASPBRDRAFT_36708 [Aspergillus brasiliensis CBS 101740]	Aspergillus brasiliensis CBS 101740	99.3	277	2	0	1	277	1	277	3.58e-189	530	MTNDAKQRAENAANSDGEEEEDVFHDARFPAEEETRLLEESHTIKAEANKLFTAACYDQAISCYDRALASCPNYLDYEVAVLRSNMAACYLKLEDWKASVDSATACIDRLDKVVPPATGTADGEGGDKGKQPQESSGEDAVVEITGDDEEAEEELKRLQKQDEKKRDVMRIRAKALMRRARAKLQLGGWGNLQGAEEDYKELAAMDNLPPDDKRVVQKALRELPAKIGQAREKEMGEMMGKLKDLGNGFLKPFGLSTDNFKFVQDPKTGGYSMNFQS
g651.t1	OJJ77495.1	OJJ77495.1 hypothetical protein ASPBRDRAFT_50371 [Aspergillus brasiliensis CBS 101740]	Aspergillus brasiliensis CBS 101740	94.2	535	16	1	1	535	1	520	0	1012	MSNIIQATTHLGEIRGKTTNGVTQFLGIKYATLKNRLADAELVERRDGGILDATEDGPTAISPLGGCDLELSAIQHTLPKKELTQSDVDCLNLNIAVPAGTPVHSKLPVFVFIHGGGLMIGANSWPQFDYERFVKLSIDNKLPIVAVSVNYRLGSFGFLTSDELRKAGYKANNGLRDQRVALKWVRRHIVDFGGDPENITVAGMSAGAASVTFHLDSETPLFKRAILMSGSQFFVQALPYDVHEGNYQHAMSTLGLQNATSDERIKALLELPGQDLLAKLPPSVLSAPAVDGDMVPSAATYAQVADRASDIPRGKQWCHDLLIGDAQCDINILAILMPHLKNVCAERFAKAVHSVFSTKQELATQILAGYGLTAEIADDEAFPAVLNYLNDIFILAPTL…
g652.t1	OJJ77496.1	OJJ77496.1 hypothetical protein ASPBRDRAFT_202458 [Aspergillus brasiliensis CBS 101740]	Aspergillus brasiliensis CBS 101740	93.1	202	14	0	1	202	69	270	3.03e-139	400	MFDRRFTGGMRVRYGCPVWCHAVEAGYRQYGQLPVAPYAQTPTASADSKEPQDTRSINQREVDIQNAMTYYYQTELHAYNTLNDLQTGHIPKLLGTATMAWEVTNGMGSTFIGSCPALILVPLNGIPFLSMNYILQHTWHYIFLDIVNIRKILKSRDLHAIDTTPRNIVVVPSHPWGVFKAVLFSLQMNDGPGETGTSTTNH
g653.t1	OJJ77497.1	OJJ77497.1 hypothetical protein ASPBRDRAFT_112481 [Aspergillus brasiliensis CBS 101740]	Aspergillus brasiliensis CBS 101740	99.2	637	5	0	1	637	1	637	0	1280	MRISNLLCFGGLLGAALASTETGIAKRSTVSEILTDIEDAATCAACEALLVVLQALAHLGNDDFVDVITEVCILAGVDDDDVCKGAISLEGPILAHDLRYMDVPSKTAVLFCTTIFGLCDYPAVAEYTVDFPSAKPANASRPAPSGETPLQIVHISDIHVDLSYETGANYNCTKPICCRPYTSSDDPGVTDYPAGEYGNHNCDAPLTLEESMYSAIQELVPDASFVIFTGDVVEGAVWLVNETEVTNDLNDAYKSRMADYFDLVYGVTGNHDCAPVNSFPPADVDTTISSQWAYDTLSSDWSQWIGSTAASTADDYGAYSVRYSGGNLRIISFNTNFYYKENFWLYEKTMETDPSGQLAWLVDELSAAETAGERVWLMGHMPMGSGDTFHDASNYFNQI…
g654.t1	OJJ77498.1	OJJ77498.1 hypothetical protein ASPBRDRAFT_113249 [Aspergillus brasiliensis CBS 101740]	Aspergillus brasiliensis CBS 101740	99.3	843	6	0	1	843	1	843	0	1667	MEKDPRLGCSDPDSSTYDQAPPPYSPYTDGGLVVESADVQANGRINVDLDSKLARTLASIIEQQQEDLQNPPPDYSEGQPVKDELLQCDIQLNIVIQIVGSRGDVQPFIALGTELQKYGHRVRIATHDVFSEFVTQSGLEFYPIGGDPAELMAFMVKNPGLIPQISSLRAGEVQKKRAMVNEMLHGCWKSCIEDDPVTKIPFVADAIIANPPSFAHIHCAQALSIPVHLMFTMPWTSTKAFPHPLANLSSSEMNPSVANWVSYGVVEWLTWQGLGDVVNRWRASIDLEPIPTTEGPRLAETLKVPFTYCWSPALIPRPRDWPANIDVCGFFFRDPPSYEPPPGLKDFLKSGATPIYIGFGSIVIDNPQKMTGIILEAIAKTGVRAIISRGWSKLGGGPN…
g655.t1	OJJ77499.1	OJJ77499.1 hypothetical protein ASPBRDRAFT_113437 [Aspergillus brasiliensis CBS 101740]	Aspergillus brasiliensis CBS 101740	99.6	838	3	0	72	909	1	838	0	1622	MSILPSAASAASASLTAAQSLNTTSSIAAHSSLSSSSRELLSLPFRGLSQAEAFTFSTVPKQIAKLVGLQDMATRFWGAASGTGLEPEAVLATQTAAEVVRDGVVDAAAQADSSFQFSDILQAVMKFSGFFSYLTSRWSLACFTVALVLNRITIYASTRRHLNLDWTRRLALRIVPIVLFTTQIYALLRSIRCQTSPEYSTIRYGTPGKRMLFDHSGGGGFLHSLSSTLLPWETDEQSCNAVHMGRPVNASDISYGSFRLLWPVFLRLCLSHFVETLSCALQGRAAVTEAGMSIFEHSLAFAEAESMISQTLGLGIFGLSKQSSAKDVSGEGGQSTLHLLTRSQALERMNVTPELLLIAMISCCNSLTSNALDVIGRQSRYRLVNTAFWGLCFMSTMAW…
g656.t1	OJJ77501.1	OJJ77501.1 hypothetical protein ASPBRDRAFT_70883 [Aspergillus brasiliensis CBS 101740]	Aspergillus brasiliensis CBS 101740	95.6	203	9	0	1	203	1	203	6.01e-94	283	MQLFHALFILLAGSFVTAQLPNIPSCSINCFISAFQHDGCSQLTDFACHCQKPDLPSTITPCVQRACNAADQSAVSSEVVRQCSMAGHPISIPPVGGGPETTTMSMPRTSTTESGAVSSSAATATLPTVSSSGAASSSRVSHSASASASGSHVTSNPGSHSQSSAGSSSTPSPSSPLSTGSASTVKAGVAGAMIIAAAAVCVL
g657.t1	OJJ77502.1	OJJ77502.1 hypothetical protein ASPBRDRAFT_50376 [Aspergillus brasiliensis CBS 101740]	Aspergillus brasiliensis CBS 101740	97	197	6	0	1	197	1	197	2.08e-121	352	MPPSRRRGGNTAATRSNQATLSFGSKSRVTKPSAAPSTRSQKAKDLDLIDATRSTTPSVEDVSEAEQVTVTPTEPTQPHVAELAVRKQARTEIQQPRSEEDAKAEKITERQLQQYWKKEEAKRQGPRVHQEGLDLREKILRNFDLSSQYGPCIGIARLKRWRRAHMLGLNPPIEVLAVLLKPDDNIKQRAYIDELLS
g658.t1	OJJ77503.1	OJJ77503.1 hypothetical protein ASPBRDRAFT_50377 [Aspergillus brasiliensis CBS 101740]	Aspergillus brasiliensis CBS 101740	98.5	402	6	0	1	402	1	402	3.28e-289	793	MAAFVRVSGPPNGHFLIGYPALTDLQKPRIEGKVEIRPSVGITAPVNVSLVTISLHRRETIHPSADSVTKKHLAPPRKEITDIVGKEMLLFRCPAGREYEEVISMDLPFVLFIPFGRGGPDASRRVPPASLQLPSRTAETFYEVVVMVQQGHSDQRKYTFPVPISRYDTLSTFGMYNRPESAERVSDHLVTLGISLPRWSYGPLDPVSVYVKLSPNLDWIGKARKVTINKITIGIDEEIIYNHEGDEPQRKVRTLTKRTEPIGVKLPPSGFLTNLGLVFPARDLRDSKGILPRSDMAFPAYAVTGFTTTASLYKIEYYLTVKAHLTSARDIVIRQPIVVCPLDHAGCKEEMDAIEQAAREAVHINPDNPMLPLPSIVRPSDPNALRHLGVAIVGNQKKP…
g659.t1	OJJ77504.1	OJJ77504.1 hypothetical protein ASPBRDRAFT_166390 [Aspergillus brasiliensis CBS 101740]	Aspergillus brasiliensis CBS 101740	91.1	471	14	1	60	530	1	443	2.50e-309	851	MILSFHKNWLELQIFLSEVDIDPPAQLNFPSTLAFPSRALHPRAIPQALLIGSLSAGITMADIDEAVIHMPSQDASAHIDTDLSDETQDFRMLNSISLSVLPRVFLGPFLNYRQMRIWYTDNRENSLTDGSQQSLPKRGEKDFEPNPTLFQADILSASRQAMHNALSYPRLHHPKSQVIGIYSPNGPTPPKSAQKLDTITEGSEPSKPAGTGLGVHPDSCVYVPIPKGQYFKSIGQADRWNRIWLLPEEALYLLERGTLDIRWPCSEVGCADDEDTDDSGIPMSLQAAYAAFMGRSGLTSERYSVYTGLRRLGYTIVRAPGWYDVEEDTETTESQQTAVEKPQGLGLGLAGVFRQLLQWLYKPGSATTALGPVVGLGIHRSYDDIYQKLSIIPWYDPTA…
g660.t1	OJJ77505.1	OJJ77505.1 hypothetical protein ASPBRDRAFT_166392 [Aspergillus brasiliensis CBS 101740]	Aspergillus brasiliensis CBS 101740	98.1	106	2	0	1	106	1	106	1.74e-67	208	MSTSNSSTSQSEYVTLVSGDGFEFVIPRSTACVSGTIRRMLEPSSRFSEAVTGRCVLENISGIVLEKVCEYFCYNEKNKNQTFVPDMDIPPELCLELLMAADYLDA
g661.t1	OJJ77506.1	OJJ77506.1 hypothetical protein ASPBRDRAFT_36715 [Aspergillus brasiliensis CBS 101740]	Aspergillus brasiliensis CBS 101740	89.9	348	31	2	1	344	1	348	6.22e-197	555	MHQRHMLRLRGVTSRLQANPTYTPQHRLPLLSLSTQQRAYSATSETQFTPSNRLANRTCMITGGTSGIGFAIAERFLQEGASHVILVGRSYDRLHNAASRLQIESPETAPKEPTQPIANPEQHQLLESSSRISLLVGDIAEAGSWARELEKAMQTTNPDILVNAAGLSISSILPKSEPTDISRILRTNLEGALLTSRAFIRASIRNRMKRSSTATNGNNNGSSSTASSKCIINISSLLAHKSGTGAVPYAASKAGILGLTRSVAVEAAASLRDVVVRSNAIVPGYIETPMISDFSEGETARLKESIPVRRFGRPDEVADAAVFLAQNEYANNCVLNLDGGLSAV
g662.t1	OJJ77507.1	OJJ77507.1 hypothetical protein ASPBRDRAFT_190810 [Aspergillus brasiliensis CBS 101740]	Aspergillus brasiliensis CBS 101740	99	617	6	0	1	617	1	617	0	1183	MTRETYLKRSLGTLARQIKESRVLLVGAGGIGCELLKNLLLSGFGEIHIIDLDTIDLSNLNRQFLFRFEHIKKPKALVAKEVAHKFQPNAKLEAYHANIKDSQFNVDWFATFDVVFNALDNLDARRHVNRMCLAADVPLVESGTTGFNGQVQVIKKGVTECYDCNSKEVPKSFPVCTIRSTPSQPIHCIVWAKSYLFPELFGISEDDSSEFDHSEDAENSEEIENLRREAQALKEIRQSMGSDEFAQKVFEKVFQEDIDRLRGMEDMWKTRDPPEPLDFHKLQEESSNIEPVVSCNDQKVWTLAEDFVVFKDSLDRLSKRLKTLQDTIKSDVKPILVFDKDDVDTLDFVAATANLRASIFKIDPKSKFDTKQMAGNIIPAIATTNAMTAGLCVLQAYKV…
g663.t1	OJJ77508.1	OJJ77508.1 hypothetical protein ASPBRDRAFT_239347 [Aspergillus brasiliensis CBS 101740]	Aspergillus brasiliensis CBS 101740	99.3	409	3	0	1	409	1	409	1.08e-302	828	MSDDEADPELIALLRETLGLGGSSSPQIAETKVLENAQYAFDNAIDVALNPSKTKEAAETIWNLMQKKEYSTQTWSEHELHPKTKDESTVNFIFTMDLLNFSFWSELPSEKRFAIEYRGRKWTGYWSLVAALQRALDEGIPITTPEFWTKEDECTEELIKHVFRSATDEEIPLLQERLQCLREAGRVLCREYEGSFVNCIYNSNYSAASLVNLLAESFSCFRDETTFHGRRVRIYKRAQILVADLWACFNGEGYGEFNDIDKITMFADYRIPQMLHQLGCMAYSPPLESHIRSLKPIPSGSNWEIELRATSIWCVELIRREIERRHPEIRVNPTANPNKDKPSEDNEDTEDHQQKCSTQKFVKKEPVQKPAGMGVNAILIDFFLYDTMKEIEKTGQESI…
g664.t1	KAI2843809.1	KAI2843809.1 hypothetical protein CBS12448_10044 [Aspergillus niger]	Aspergillus niger	92.5	467	24	5	1	465	1	458	3.28e-290	801	MNNRPVEQALATLLPTHAQDLPQELLSLAISLVAQSRSFSSSLKPEEEIARPYACAEIACKRLTRALKLPSLLGHPPCPPRAYKKLYAFLDRSLSTGISRAGSASASAPGTPSRAGSAPSTPRKGTQRTPSKTAATATATPRGIQQHQQNTPTKSTPLKRALSHTHNNDTDKPSPSPRPQKIPKYRANGLSGSTIIPDAPSWVMNSIRTVCKTLSSPAPRMSTWSRPPISRTLPPHIFAGVSSILYLISEATAKHDEEIDEEMMEFLEPVILAKDKETDEDFKEIINALIVAVYFLVLARRRQPGPSSSGDNAEAAEAKKMDKKTFSEMRQTALVSLGLPSTERRHREDVDQWIALVMEQGWAHGQEWFENVPLAGELDGDEGDLGDELAGGVVEEDGG…
g665.t1	OJJ77510.1	OJJ77510.1 hypothetical protein ASPBRDRAFT_50384 [Aspergillus brasiliensis CBS 101740]	Aspergillus brasiliensis CBS 101740	98.6	210	3	0	29	238	5	214	1.15e-144	413	MSVTVSTHPQSHYYQFRRILLTTNLTHQLHTTHGDLKVELFCEAVPKTAENFIALCASGAYNNTPFHRLIPGFMIQGGDISLNPSLTSTSTSTTKPPLPFEDIPKGGTSIYHPSALNQEIHLPALKHNTRGILSMASRPVKDRTAPGSQGATGATINGSQFFVTLAAAPHLDGASTVFGKVLNLTAQDEGGDVLGRLEKANVKVDKKGRVVQPKEGEEGGYEALRIERVTIHANPFAK
g666.t1	OJJ77511.1	OJJ77511.1 hypothetical protein ASPBRDRAFT_190814 [Aspergillus brasiliensis CBS 101740]	Aspergillus brasiliensis CBS 101740	99.6	461	2	0	1	461	1	461	0	914	MSADENQTQPESQFQKPGDLVERNDETGVMSLESLCTNCHENGTTRLLLLRVPFHGDLILESFECEHCHFKNNSVKSAGQIKEKGAKYTLQVENETDMQRQVIRSDTAVLKVETLGIEMPKGDGQLTTVEGVIQTIYESLSSEQPLRKEQAPELHDALVPIIDKLKSMLDREAYPFTISLDDPTGNSWIAPTTADNINKYKRRDYPRTHEQNIELGIAGDPDAVQHEGVAEPDDDEIIDGKVYSLPTECPACSKDCFTNMKRVSIPYFKEVYIWATACEHCGYRTSEVKTGGEVPEKGKRITLSVENEVDLSRDILKSDTCALYSEELEVTVQPGTLGGRFTTVEGLLTEIRDQLHGQIFDVDDTTGSGGDSMASSDKEKWARFFKRLDSAISGELKFV…
g667.t1	GAQ42020.1	GAQ42020.1 hypothetical protein ASPNIDRAFT_38758 [Aspergillus niger]	Aspergillus niger	90.5	683	43	3	1	667	1	677	0	1204	MPVNKQPKRDNKKPIASLPAAATVVTHIKLNALANSLVQDVGGPVVMMSANTLYVTASLRCKRDSSYLDELLTQNAQLREQLRSISSPQSSSATTAERSVPQESYPPVQNPLLGERAWFYPYDPSAPPIYMGDAACTAFATRLRQFLTGDPNTAHVARTQYTPESSLLEGATQWPNLAQARLLVRIAFNQLSRVYHLFLRKSTIEHLESVYRTPSLRDDPAVMCKFFSLFALGEVYSSRANSSPTGRVPGTMYYVRAMGLIPILPERPGVIHVESLLLLSLYSYFLNRRHSAYMLVGSAMRLGLILGLNHNIPARQCTDPIERQHRVRLWWAIYVFDRMYTSKFGFPLQIRDDDIHVDMPTEVESPAAEEQFSDTAYLVASIRLSQIIGQTIDKIYCRK…
g668.t1	OJJ77513.1	OJJ77513.1 hypothetical protein ASPBRDRAFT_166413 [Aspergillus brasiliensis CBS 101740]	Aspergillus brasiliensis CBS 101740	98	1130	22	1	50	1178	25	1154	0	2044	MLIQRSYLDVQFQLEHGSAEFSVGDNIKGTAYIVPRENISPHQLSIHLGDNVQIQKSRGQSLLDILNETLHEDEKGTGSARRDIIIKALNLLSLVHTAFANPSSDADSPSQTAQGTEDVALEDAKRRRLLLALLDLIAVEGIYPSLSRGLGLPLHQRVFSALPAGIIAQQQHHAQESPEDEFLLEKIWTALSGIVFDAQVSIQDVIRGRILSDMISAAADLAYNSKSLSDEKRDSYRRHLSRLVEETPSPVLLSTLSSFLQSDPAPWFKSLVSSQLSRIPLRPGGVLQTMVFLASQFAPSLGAEAQAQASNGPIFTVQGIMQTSRLLSSVPEGMDPVNYFSTIAPQLLALIDGDDPDLKKTAAYVIGNGILGKRAYGAPGTVGHSIFLEPIFKALTAGL…
g669.t1	OJJ77514.1	OJJ77514.1 hypothetical protein ASPBRDRAFT_114268 [Aspergillus brasiliensis CBS 101740]	Aspergillus brasiliensis CBS 101740	99	718	7	0	1	718	1	718	0	1364	MEMPTSDSSSIRVAFEGCGHGCLHDIYASVDKAASLKGWDGVDLVIIGGDFQAVRNANDLACMSVPMKYRELGDFHEYYSGRRVAPYLTIFVGGNHEASNHLFELYYGGWVAPNIYYLGAANVIRCGPLRIAGMSGIWKGYDYRKPHFERLPYNSDDVQSIYHVRELDVRKLLQVRTQIDLGLSHDWPKKVERCGDYETLFNTKIGFREDSQNGRLGSNAAKHVLDRLRPAFWFSAHLHVKFAALIQHAEYVVPEHPAAKRQAAAAGSDANQRSGTSHAFALDGAVFTSLVLGEENPLNEHTAVAATANAGKQDDHTISPRNSQLLSEGGQSASEPSRSDASAEGATTNMENKLSAWNNFHVVAARREAAENDLFLSGKAETQGPNPYDIKHNLTWKRI…
g670.t1	OJJ77515.1	OJJ77515.1 hypothetical protein ASPBRDRAFT_239506 [Aspergillus brasiliensis CBS 101740]	Aspergillus brasiliensis CBS 101740	97.5	201	5	0	1	201	1	201	4.17e-123	356	MPLSDHAPRLEFLKGSASALNALSPSTAAYLMTIHNGILRDEFKPLNQRLQETSCGACGSVRSPQWTKTIVIQKKKGKQSNAGRAGKASSDGATILKCLRCRRRTVKPVRKDAARPALPPKATPTAAAATTPDIQSSAATTPQNESATGLADQGRVNKAADNASSKKRAKARKQGGLQALMASKQQSRSNSSSLDLFDFLQ
g671.t1	OJJ77516.1	OJJ77516.1 hypothetical protein ASPBRDRAFT_111874 [Aspergillus brasiliensis CBS 101740]	Aspergillus brasiliensis CBS 101740	97.8	1036	22	1	1	1036	1	1035	0	1882	MSSYDDEHDPQADELRETALVTLETLISSCSSQMQPYMSNTINSALRFLKYDPNVAEAEDDEEMGGTQDDGSEDDVTEEPELDDDDDEFEDFEEEGGYSDIDDMSWKVRRCAAKLLYSVISAYTRGRASDDASLFQQISPALIARFNKEREESVKLEVVSTMTALVRKTGEGAMIITSNGFLEAVGGSKNSRKRRRQDSDASMIDFEPSIGTSSAVSTPVVAPSSPKSGPQAELARSVPIIVQSVVKMWKQASVPLKQAIIVLLKSLALVRYGGLADHLQQIEDPIADVLKSSSLSGGSSAPVGSSASAGTLQTETLGLIAAIAETHTSDALLPFLIALIPGVIGAVNDRNYKVSSEALGAVEQIVKALTPPRVPSASQDLASHLERLYDVVHTRITDT…
g672.t1	OJJ77517.1	OJJ77517.1 hypothetical protein ASPBRDRAFT_115115 [Aspergillus brasiliensis CBS 101740]	Aspergillus brasiliensis CBS 101740	99.1	1862	17	0	1	1862	1	1862	0	3323	MSDNPPWLDNLSDDWVPVPVPGTPTSPVPSRSISHSRQSSLQNSPSRIPVPARRSVGPSPSPGDNKKKVSRPCHFVRREPPTPKTPRTPKTPSKLRSPVPDKTKKSPRPNPPSRRKQSSTMDTRSPLRSVSNASGQSVQQSTVQVKPKKAKGSEGTPEWRRRLVHGDIPSGEQRDLFAPIGLESVFKPPTPGTEKTQDEALSRMKHSDSIWNFSTSSERRDNATSNIPPGGGGGQHEFGEGAGQSSPKSPRSPTKSSRQDQGEPRSSPGSPRGSHNGMLDVRKGPTKSAINQGDGHEDSWNGTQLRSASGLEDMRNEDITPITFSQPNTMDGNAASEVIRSALKKVTNKLERLQLPPYERPDSPASDSFLLNQPSEARVDPLPEDDLLDVTSHSLPKDL…
g673.t1	OJJ77519.1	OJJ77519.1 hypothetical protein ASPBRDRAFT_141331 [Aspergillus brasiliensis CBS 101740]	Aspergillus brasiliensis CBS 101740	99.5	192	1	0	1	192	1	192	4.97e-122	353	MVLARPHILRASARAVGAGVGVAARRPPTQQFARRGYAQSHDAPKSSDLPWLIASLGFGVPTAYYLLQSGPKKTPHHGHEAHGAGHVEKEEKAPAGEASPQPDRDAEQKTDTSSSSAENTPSTDGKPPSEADQPASRKESGSSATISGKQEGLSNTDTSNPYVNEPGKSAKGEGETETAKVKGTVSPERPQA
g674.t1	GCB20211.1	GCB20211.1 cullin-associated NEDD8-dissociated protein 1, N-terminal part [Aspergillus awamori]	Aspergillus awamori	85.5	774	56	7	1	723	1	769	0	1255	MADRQSVQHSLNSLLSKLGDPDPDMRYMSLNDLLGILNNPNSTYLAHDQASSSRLAEGLLKALDDQHGDVQNQALKCLGPLVIRLPFESLASLLEKLTNLTASQTIDTSVPNTALRYIVTALPRPQAGQPPSQEATMAYSAVSRVLIPRLTGPTPSPTSRRGSIVKGMLEKDPSKGFSSDAIDVLIQVVTCFGPLLKESELTALQNSVLSIIDNDTAGTVVTKRALTAISALVLHFSDAQLSAFVQGLVQRFNSPQLSTVHRRHLIATIGGVAKSAPAKFGPHLPTLAPYVFAAVGEDNLAQHARLRATSSAYSLTVKELIFCPLPTEMLLIRSLSSVVLVLAVALIMASALRINFGHCDAHTTPGGPPTDKIPRPHIGNVPYGPKFIRSCTTSGTIAL…
g675.t1	GAQ42028.1	GAQ42028.1 vacuolar protein sorting protein [Aspergillus niger]	Aspergillus niger	83.2	1633	201	11	1	1582	1	1611	0	2373	MALTSWKAFNFFDVSAVKLPEESSSIFNSDIISLSTGSANIFLGSSDGLVHIISTNFKLVRSFRASETGSIAHIKQMEGTSLLVTIVEDLPNEAALKVWALDKSEKKTGAPRCLSTTHVQNARRMFPVSAFAALDDLSQVAVGFANGSVTIIRGDLIHDRGARQRIVFESEEPITGLEVQSGPVSTLYISTTNRILALVISGRGQGQPARVLDDMGCAVGCLSLDRDTGDVLVAREDAIYTYGPHGRGPSYAFESRKDSIITFKDYVALVCPPRDTTTKPDTLRNIGVGQADDIFKTTTFTLLDTDLKFIAHSESLVSSVKNIFVEWGDLFLLTTDGKLYRYREKSLQQKLEILYQRNLYILAINLAQKTGVDTLQQNAIYRKYGDFLYQRGDFDTAMQ…
g676.t1	OJJ77523.1	OJJ77523.1 hypothetical protein ASPBRDRAFT_70901 [Aspergillus brasiliensis CBS 101740]	Aspergillus brasiliensis CBS 101740	91	279	13	1	2	268	164	442	9.68e-180	512	MFQVRNPDAHTLHTCLVHPPLGISLDQLTPLLPGKVMSSSMVRTTLRNILAALDFLHTEAQVIHTDIQPNNILLGIKDTSILSRFEEAELEAPIPRKSLSDRTIYVSRPLPISFGTPVLCDLGEGRLGIDNQQGDIMPDIYRAPEVILNMTWDNKVDIWNVGMVGPKDEGRLDDGQHLAEMQAVLGRPPSQFLARSERSPQFWDAKDQWKGAVPVPDYDLETLEERLEDGEKEDFLRFLRRMLCWLPEERATAKELLFDPWLMHGLFK
g677.t1	OJJ77524.1	OJJ77524.1 hypothetical protein ASPBRDRAFT_141341 [Aspergillus brasiliensis CBS 101740]	Aspergillus brasiliensis CBS 101740	96.6	674	23	0	1	674	1	674	0	1259	MPLRQPPASPLSLETISPSPPDLDSDLLVASDDDLDESDRAARDQRIEKLAQAYCHGTPLFILSASLRGPFDNGWANPWKKDRQKTAGHVRTGGNQLNHPERPVIPETVPQKRPLYRESLGISRSKSAIPLSDSTYSTKKRETQDGTMGEPSFKRPRDDRGRTSSSNNTPKPAVLHKRIIETSGHSDALTPFQHTEQSWLKRDRAEINFRKVDPPTSPTTTISSRHREGGHYTIQVPGTDYRVTTKNLFRARPGSRDESTFDSHVPDSVKAQLTNRPSKVRSETEDHENSICVLSSTSHLSKFEFRRRKCSADPEHGTKSPVPMQADNEQISHQTTVVEDSRVSSQPAPLPPNPTSMQAVEADMHMHEDNTHNPNVSERSGTVDHQGNSQSRKVSSTTT…
g678.t1	OJJ77526.1	OJJ77526.1 hypothetical protein ASPBRDRAFT_239799 [Aspergillus brasiliensis CBS 101740]	Aspergillus brasiliensis CBS 101740	99.3	420	3	0	1	420	24	443	6.72e-290	797	MSTMNEVSPIEPEAPKWDKVLQNQSAEKLSKPHTKRRKKSLLRRFKDVCLKHTWLLPLIMLIVLLSMYAINPTESNPMHSAIFLSYPQPPKVPGGPIMYGKGPKDITFVAFYTIVLSFTREFLMQRLIRPFAVYCGIRGRGKTARFMEQVYTAIYFGIFGPFGLYVMSRSDIWYFNTTAMFEGFPHREHEGLFKAFYLLEASYWAQQAIVLMLQLEKPRKDFKELVGHHIITLALIGLSYRFHFTYMGIAVYITHDISDFFLATSKTLNYLDSIVTVPYFGLFVVMWIYLRHYLNLQILWAVLTEFRTVGPFELNWETQQYKCWISQYITFALLASLQAVNLFWLFLILRILKNYIFNSIKKDERSEDEDSEEEEEVPLPDTDTHATLATGVEGTTVTA…
g679.t1	OJJ77527.1	OJJ77527.1 hypothetical protein ASPBRDRAFT_190828 [Aspergillus brasiliensis CBS 101740]	Aspergillus brasiliensis CBS 101740	99.1	751	7	0	1	751	1	751	0	1468	MPFSHLTGSNVARSLSPPSQDRLKQQSLLPNVGAMDLNKRLFHLDIENKTPAQPLNFSMVTTPPDDEDDDEVNHLKLKVEPQQAPQSPGKPHHHEKSMPDTDAQQPPAALGRIYRYTPIPSVILDPSLHVVEVSDSHVAFAGLSRELLLGRFICDICPRILPSLDIAILFGALRAAITTQDVQSIDKICIDDSSACYSLRITPIFEHSNLLYVVLEALDITKRRGTPVANLHGSYSNETYKVLLDTVKDYAIFMLDTRGHVVTWNTGAALLKGYSAKEIIGRHFSTFYSPEDRIADKPGRELEVCLREGKVEDEGWRYRKDGSRFWANVLITPMYALGRHIGFTKVTRDLTERNAAEARMIAAFEESSRLKTDFLANMSHEIRTPMNGMLLALASLMAT…
g680.t1	GAQ42034.1	GAQ42034.1 C6 transcription factor [Aspergillus niger]	Aspergillus niger	90.1	1586	71	7	35	1600	19	1538	0	2689	MPVQIISISSGPPNLPGIWSVFAPTAPVEETVYREPSLNGTSDASSILSDTHAQNILPYEADDSPFPEVRAVVKPVDDRHLPVNTVRMWVIGMVFTIVGSGLNQFFSLRQPSVTISALVAQLLAFPVGCAWAQWVPLGWFNPDRHFNIKEHALITIMSNVSFGSAAASQVIEAMVKFYDMPSHGGFEILLMITTQLFGFGLAGMAARWLVGPATMIWPQVLSNAALLSTLHSRQNLMADGWVISRLRFFMIVFVAGAIWYFAPGYLFTALSTFSFICWIVPDNVVVNQLFGQKTGLGMSLLTFDWAQVVYANQSPLLVPFWAGLNVIGSFVLFYWIICPIIYYTNTWYSAYLPLLNPDTFDNTGKPYNTSRVMNADGTFNVEAYRNYSPMFLPAGYAMT…
g681.t1	OJJ77530.1	OJJ77530.1 hypothetical protein ASPBRDRAFT_113685 [Aspergillus brasiliensis CBS 101740]	Aspergillus brasiliensis CBS 101740	98	455	9	0	1	455	1	455	0	901	MASEAPKAQAFYGTFIHTLSSKHLEILSETFILLSPTGTIHAIHPSTPATSIPNLLADYKYSESTCTVTILQPTEFFIPGFIDTHTHAPQWAQRGTGRGIDLLTWLETITFRHEAKLADLEYAKSLYTSCVRGGLKQGMTTACYYGSRHAPASVILAETCLSLGQRALIGKCNMTRHAPDWYRDASVDESLRETEDFIAQVRKLDPTHGLVTPVITPRFAICCEEELLAGLGNVAARNRDLPIQTHFNESRGEVDFTRSLFPNDKSETELYERLGLLNDRSILAHSIYLSDAEIERMAELQCGIAHCPIPNVTMDEFMVAPVREYLRRDIKVGLGTDCGGGYSSSMLEVMKSAFVVSTARCTMTQGQDQPLSLTEGFYMATLGGARVCGLQEKVGNFLV…
g682.t1	XP_025479712.1	XP_025479712.1 kyphoscoliosis peptidase [Aspergillus neoniger CBS 115656]	Aspergillus neoniger CBS 115656	92.1	700	55	0	1	700	1	700	0	1239	MAEEPQVMSIQQRIAALKQAQVGQSSGTDTSEPVLVQPTPMPIRPAAPPRPKTFTTNTNNDSYNNHAAGSNGSIYNRSSASNDAVPPRPVPRPATAPAPPPVKNKAPPPLPARKPSDQQRPALPPRRPTQISHKGSLESMASDISRSTTTSTGRTSASSINTGPGRSLPPAWGEAELPPLPPKRQPQPPPRPTPTTTRSSSSSRLSPPRPSLPLRRKSSQSNYSTGSNDSQASRLPPPLPSRTTSDRSSTINEEEEKNPPLPARRLPPPPPSNDTLGKLKQSGFAAINKSFGSTNGAANEPNSNGVPPPVPLASRPDLSKIQATKPRLYASNAPTMPTPVACLKCRDFSAPDAHATRYPRTSLPTHDLSWLANELTAPFPSLTDKARVIFTWLHHNIAY…
g683.t1	OJJ77534.1	OJJ77534.1 hypothetical protein ASPBRDRAFT_50405 [Aspergillus brasiliensis CBS 101740]	Aspergillus brasiliensis CBS 101740	99.1	639	6	0	1	639	1	639	0	1279	MRASIILLGVTAALASPAPPNHVVHERREALPSVWVEESRLDKRALLPMRIGLTQSNLDRGHDLLMDMSHPQSSRYGQHLSGEEVHDLFAPSNEAVESVRAWIESAGIAPSRISQSHNKQWLQFDAYASEAEQLLQTEYYIYSHADTGSSHVTCHEYHVPEAIQSHIDYITPGVKMLEVRGTKSKKRDAEKRSLGSFPPILAPLPINITKILDDPLAHCDLTVTPDCIRAMYNITKGTTATKGNELGIFEDLGDVYSQDDLNLFFANFASEIPQGTHPTLDSIDGATAPVDVDDAGSESDLDFQVAYPIIWPQNTILYQTDDPNYEDHYTYKGLLNNFLYAIDGSYCDETSSLDPQYPDSAPGGYDSPKQCGVYTPTNVISISYGAPEADLPIAYQRRQ…
g684.t1	OJJ77535.1	OJJ77535.1 hypothetical protein ASPBRDRAFT_141363 [Aspergillus brasiliensis CBS 101740]	Aspergillus brasiliensis CBS 101740	99.7	334	1	0	1	334	1	334	1.38e-242	669	MSLGKKVTLNSGAQIPQLGFGTWQSAPGQVGDAVYEALKAGYRHLDLATIYQNQREVAEGIKRAYKDIPGLKREDIFITSKLWNSQHDPAVVEKALDECLAELELDYLDLYLVHWPVSFTTGSELFPLVKDSSVEGGDVVINDNISIVDTWKAMTQLPKSKARTVGVSNHMKHHLEAIINATGVVPAVNQIERHPVLQSNELIEYCQQKGIHITAYSAFGNNGFGVPLLVTRPEVKEVAESASKRLGTTVTPAQVILAWSQVGGHSVIPKSVTPSRIQENFKEVELTPEEIAKVSELGKERRRYNTPYIANKPRWDIDIFGEDEEKPAGHKVIV
g685.t1	OJJ77536.1	OJJ77536.1 hypothetical protein ASPBRDRAFT_114483 [Aspergillus brasiliensis CBS 101740]	Aspergillus brasiliensis CBS 101740	99.4	322	1	1	1	322	1	321	6.60e-246	677	MSKRRLFRWPARRTAGLGCLALLVTSIASWYLYGTRPYEPQPAVHQETSNNDHDIVTSQLAQLTSTYSNATNDIGLVLAATVKEDLTWLLNYCKDHGSIPFIYTTDQPPAPHLLVPRTIRGREAAAYLSFVVDFYHQLPKYTIFIHSNLDQWHNDLFGPHTSPALRNLRLEAVDAQGYVNLRCEHDPGCPTSVHPWNPTQIDIEKDDIRAFFPEVYETLLGVPAEKVPEHIGNVCCGQFAVSRERILERPREDYERMLKWADETELTDSFGVGWVYEKIWHIIFGMDVIYCPRYEQCRCDTYGWCGPLASGETLQAVRAKKS
g686.t1	OJJ77538.1	OJJ77538.1 hypothetical protein ASPBRDRAFT_50409 [Aspergillus brasiliensis CBS 101740]	Aspergillus brasiliensis CBS 101740	98.7	450	6	0	6	455	1	450	3.96e-300	844	MLIGCIVKFVQESSDDSDGGNTTDAQPEIQDNRDDNQAASEDVQRDISDQISIFNHLPFPEVLYSQDENIRPPHVDSSSPPVGSPVFEDPPIVASSSGLSPSLLNIVSPLASASTWTSSASPLSSVSPRPSSSPPLSSREAHLLRLFIQKIAPWADICDLRSHFSTEVPRRALQVPMVLKAVLCLAARHDAIMSNASDWEASEYHGQCLELLIAALALPEETYDDNLLITVVTLRIYEELECATDEKCHWVGSNRLLNTMSKSASSGGLAEAVSWQFLRQAIYASLVQHQPMHLDLANYELSSVFQRRDDASYANIIIFLCAKIIKSCWGSHYSFVDEGEWQHLSESVEQWHRARPISWQPLQYKDSDPAEKRPFPELWMMSPPAVVGLQYYHASCIIL…
g687.t1	XP_025539449.1	XP_025539449.1 hypothetical protein BO79DRAFT_287637 [Aspergillus costaricaensis CBS 115574]	Aspergillus costaricaensis CBS 115574	92	113	8	1	1	113	1	112	2.13e-61	194	MSDGFETERRIQATDTSQTSTGITSRGARASGASNMTDPTTFTSSSDSHGRLRGKRPLAFSAAGKGQQTDRDIGGLRRFIQPTGQEDEIEGECGLMGEEGWDENTTEEREVGFGCEVKWQLVGY
g688.t1	OJJ77540.1	OJJ77540.1 hypothetical protein ASPBRDRAFT_25199 [Aspergillus brasiliensis CBS 101740]	Aspergillus brasiliensis CBS 101740	97.4	534	14	0	1	534	1	534	0	1051	MTLRSMAWASMSVLSLLGAAVASDPCTKEMFSSLNLSNINILSLNVTAARNYATDVSLSSGTTSAPVGQLPTTIDICIVSLQYTHPGQNDIVNTYIGLPLNASSWNSRFLMDGGGGWVAGGIDEVVAPVAAGYSSASTDGGHNSTTSTAGWGFVSEGNTNWPALWDFSSVALGEAAVLGKLATGIYFGSPPKYSYWNGCSTGGRQGHMMAQRFPTYFDGIVGGSPAIDWDKFLLAEFWPAFLAQLLDTQPPACVLEAFTDAAIEACDLLDGVQDRIISLPGQCHFEASSIVGQPVNCSNPGGQITITDKMAELVQGMWEGPTSLEDQFEWYGLGYDADLTALLTTTCTSLNNCTVTPFSISADWARIFLARNSSLSIQGLTRQDFDDLYRESVDQYASV…
g689.t1	OJJ77541.1	OJJ77541.1 hypothetical protein ASPBRDRAFT_50411 [Aspergillus brasiliensis CBS 101740]	Aspergillus brasiliensis CBS 101740	98	494	10	0	303	796	53	546	1.35e-313	877	MTVDNDDPVQIWRPYLQKLPAHHDTSLINLYNLESQLLNRVPRVLSRRNEVRVRVTDVYDEHRATKLHTNLESLQSFLTKEPAIPDGLNIRVVYAPSALVNGHGYDKVLTLGSDRSIYSLDSVAPLRITPPLVALLLEQYAIHPSFIQVLLSFGRNVHISETGNSLLSVDERDNETSRVDRELRDLTSHLKRLQEDNLDDSAAVKVITLISAVYLPGSFIVSLYGMNFFVFDEDSRQIVIAKDFWVFLATWLPLTLATGLIYVLIVWFDAWWKRKPFRFFQRPGKGNVSKPETQVGKGIPNDGNVSPVYGDTNKWIFNSSTVEGWLYSTLIPYWNLTGNDTYNELISKRMYSMAGLELGDSWAESDNDTNMNHGAWALGAVTAAEMDFPADSSKQPWLI…
g690.t1	OJJ77545.1	OJJ77545.1 hypothetical protein ASPBRDRAFT_240221 [Aspergillus brasiliensis CBS 101740]	Aspergillus brasiliensis CBS 101740	85.6	465	34	3	16	447	22	486	3.82e-267	747	MHDASVDLVVVNVAQFITLDVVIGSGIFTNNEMALAIAGPMSLIVAVLIISIVILAVNEPVRAFVDFVDEHSGWLSDWLIVLGPLPTAWRVLICYVLVPAILFLLNMTGVFWYGVVETIGGFLKLAMSVAISIYLYAIANNVSQPSFEHGQGYSSNGQAQCYAILLTAYIFQDIEVYTMTAFEARDAHALRWPPRWTAYVAVAVYIMCTLGEVINVKWYDSALPQLHDGVANSTFSATSKPGSSSSMIIIAALNTGNRSMAGFLNGCLNFSVLSAANISLYVTSRTLWGMAKHIPGLHQHKEVWIKRKLAILSERTKVPVVSLLVSLLAFCWVPFLQLANSSTVQQVIQVISISCSNAIMIVWAAICLAFIRYYYWLKKCEPQLRYHERFEYIRLHKDY…
g691.t1	OJJ77546.1	OJJ77546.1 hypothetical protein ASPBRDRAFT_166478 [Aspergillus brasiliensis CBS 101740]	Aspergillus brasiliensis CBS 101740	99.6	495	2	0	1	495	1	495	0	880	MSKRAADISDEQNAALKAGERPVLDAPPDEVGEFEDEYEDEFESEDEVLEAGVDGRPDAEREEEEKDAMDLDKQTFIPGRTKLAPGEVLSPDPSTYDMLHTLSTPWPCLSFDIVRDSLGDNRKTYPATVYAVTGTQAEGRRAKENELMVLKLSGMSKMDKEDGMDSDSDSDSDDDSEAILEHKSIPLGSTTNRIRAHQTPNQSGDYSKPPQTLTATMLENSQVVIHDVTPHLTSFDVPGTILPPSANKPLSTLRMHKSEGYALDWSPLQPLGKLLTGDNDGLIYVTTRTEGGGWVTDTRPFTGHLSSVEELQWSPNEKNVFASASSDGSVKVWDVRSKSRKPAVDVKVSNTDVNVMSWSNQTFHLLATGADDGQWAVWDLRHWKPNAAAPGSQITASPV…
g692.t1	OJJ77547.1	OJJ77547.1 hypothetical protein ASPBRDRAFT_25205 [Aspergillus brasiliensis CBS 101740]	Aspergillus brasiliensis CBS 101740	100	312	0	0	1	312	1	312	1.07e-203	569	MDASQLPVAGASDVADQAHLEQPQSLDTPAPANLGLAGPDEFTTNTNGYSSDSRAHYSSHEFNSPARDFHHENDQPRQNFSPLTHQPQPLSSSRPSSEMSTSLPQPTHDLSQKQPSQAAKNSVVIKVGMVGDAQIGKTSLMVKYVEGSWDEDYIQTLGVNFMEKTISIRNTEITFSIWDLGGQREFVNMLPLVCNDAVAILFMFDLTRKSTLNSIKEWYRQGRGFNKTAIPFLIGTKYDHFVNFPREDQEEISIQAKRFAKAMKASLIFSSTSHSINVQKIFKIVLAKAFDLKCTIPEIENVGEPLLLYKNV
g693.t1	OJJ77549.1	OJJ77549.1 hypothetical protein ASPBRDRAFT_36758 [Aspergillus brasiliensis CBS 101740]	Aspergillus brasiliensis CBS 101740	97.2	141	4	0	1	141	1	141	8.47e-105	305	MTTGSCFCGNIQIEFSGEPLIVALCHCHDCRKLTSALYSYNYVFKSNDVKISGNPKELPKTCDSGAHIMNHFCGDCGTQLYGHKLNADGSPGETMIVRAGIFDDDTVNKYKPGHEVYSVRRICWLNPSDGAMQFEGMPPPL
g694.t1	OJJ77550.1	OJJ77550.1 hypothetical protein ASPBRDRAFT_36759 [Aspergillus brasiliensis CBS 101740]	Aspergillus brasiliensis CBS 101740	94.5	310	17	0	1	310	1	310	2.01e-207	578	MSKLLTILPATTQQGLSIITTITNHPTLRSEYTLRGLARNPSSPTARSLTTELGIEVLPADLNNPSTLSSALTNTHTLILITRTDYSVPDLKHQELTQVQNVISACPSTIKHIIFSGAVPTHPHGREVDVYDSKYTAEEALRALSPSVTVSVFYPGMFMQNFETFMKPLPDPVPNPEGDGGLVVYNVVDGGKKIPLVDAGRDMGRFVVPILKGNAGVVYAANGVWSFDEVVGIMGRVMGKQVRYVRVEEEVYAGFMPGQMGRKVVDMLRFYDEVGYYGGDEEGKVRETLRLVEGVRGFEEFVGEKLVNLV
g695.t1	OJJ77551.1	OJJ77551.1 hypothetical protein ASPBRDRAFT_25208 [Aspergillus brasiliensis CBS 101740]	Aspergillus brasiliensis CBS 101740	90.2	338	15	2	1	324	1	334	1.98e-212	593	MATKLKQLDIIIENRYKLVNFIASGTFGAIYEAIDLQTHERLALKMERAKDSDSLTKESEFYEKLQESRRPGMLKLHFRCQIWNEYRVMGLELLGPSLWDLKQYCGGRFSLKTVLLIADQVIPRLKTIHDKGIIHRDLKPDNLIMGRGPSGNTIYLVDMGVAREKVQAPDDPMDYEGDKALSLVGQTYRDDMESLGYLLIEFLNDRLPWTYMTTTIAGQTSEERMASSKERITLDTLCAGLPRAFKKYFEHVNSLRYNQRPNYYKLQCLFRSEFVRQGFHHDFVFDWTEQRFGEPAKKAAEKAAEEAAQKAAEEEYESFSSSTE
g696.t1	OJJ77552.1	OJJ77552.1 hypothetical protein ASPBRDRAFT_655064 [Aspergillus brasiliensis CBS 101740]	Aspergillus brasiliensis CBS 101740	88.6	678	42	2	1	657	1	664	0	904	MAHNPPSGNQPQQRASAKRVKREPKSQQTNPQPQASQSARQTKAFRLKGGMAKTKTAGARRHRPLFSEQYWDNQPKIHLTHSALMEFRRREAKIRWGGDRDKTPDLITTCKSVKEFAKRGGPDLTHLCDYQHPDTRDRRFRIPRLSMPAIYDMNLEGYLEHNGVEKRLGRALEPSNVAELRRIMREDRSDLSDFNVGARLSLAHLCTQYKTDSNALRGIYLNLFGRIGIRTENYRGTPLEGTITATKKHFYNLDPIVPHMISAKPDLVDGADRRDLMTEEERVEEEKKEEEKAKAKEKKKEKGKGKEKEKEEKEEENEGQRKTGIGQGKEKKEENGKGREGEDGEVAKEGEGKKPTILTLLDRYITPYHLLDDVQVDEEDPNKMILPNFFLYNILKHDD…
g697.t1	OJJ77553.1	OJJ77553.1 hypothetical protein ASPBRDRAFT_36761 [Aspergillus brasiliensis CBS 101740]	Aspergillus brasiliensis CBS 101740	97.6	208	5	0	1	208	1	208	2.03e-147	418	MNPNTNPLPHQHSQFHHHPQPLQLTTYLTHLPFLPLRQRIISLNFLTQSLTPQITPTGTRLITHPCFTGPAPLDHLGTIYITTGRDCVNNNASLSTRILHADVGALLESIYAKSREMLDTAIQDGSVTLSEENKIRDGVGACCRGEPEAMFREGWAVEEALWFYRVDFEDKWEVGDRDGERVLFRASVGMMVRAAEWEGNSIDNVDGM
g698.t1	OJJ77554.1	OJJ77554.1 hypothetical protein ASPBRDRAFT_36762 [Aspergillus brasiliensis CBS 101740]	Aspergillus brasiliensis CBS 101740	99.7	341	1	0	1	341	1	341	3.03e-245	677	MPPKVAVLDDYQNISPRHFTHLTSRVDISYFPDTLNPRDPAQHKQLIQRLYPFDIIVTQRERTPFSKETLSALPNLKLLLTTGTRNLALDSAYCAERGIPVAGTKYRLTGIHSTVQHAWALILGAARHIARDDAAIKRGEWQGSLGLSLAGKTLGLLGVGKLGAQVGRVAVQAFGMKVIAWSTNLTQEKADEQAEAMGLPAGSFEAIPEKLEFFRQADVVSLHNVLSERSRGIVGREELRAMKKSALLVNTSRGPLVDETALLETLNRGGIAAAALDVFETEPLAADSPWRTTAWGKDGRSEVLLTPHMGYVDEQIHGWYEEVAQNLERWLNGQEFTVRLN
g699.t1	OJJ77556.1	OJJ77556.1 hypothetical protein ASPBRDRAFT_112027 [Aspergillus brasiliensis CBS 101740]	Aspergillus brasiliensis CBS 101740	93.3	495	13	1	167	641	1	495	0	916	MSTTMTTTTTTTTTTTTQEPTPSHPTLIQVNRSPIPFASGAYSLVSAPAGSLLCKITGTTPSKKAYTSVQTGRDSHIELNSDLVYCNHSCDPTVNFDMDKMEVRVVDDRDLKAGDPLTFFYPSTEWEMDQPFESSPLNVSGAMGTLYKDHIARRLNPMRPSSSCLIMPSTILLQNATILVPSGDDVTPLRKHSLLIEGNKIAQVSSHIAPPSAETQIIDCTGKIVSPGFIDTHHHLWQTQLKGRHADHTLIEYMPTGNLQQINYSPEDVFWGQLAGCLEALDAGTTTVVDHAHMNVTAAHSLHGLQATVSSGIRSVFCYTPTHTVKSWKPELVPGGNFLDDWVVKQLSDLASAAPYGDGRVDIGLGFDGLMLPKDVVVSLYDRARKAGTKVITTHYVRR…
g700.t1	OJJ77557.1	OJJ77557.1 hypothetical protein ASPBRDRAFT_202508 [Aspergillus brasiliensis CBS 101740]	Aspergillus brasiliensis CBS 101740	64.2	402	31	8	1	301	1	390	1.22e-136	402	MTPRRTSKRVGRPRLDTTTSSTANNSAILSSNRRTQVRRAQRTYRLKKEAVFRDAIDRAEQLEARLRIVREEVAGLLSEVATEKQQLHLSYPTTIHTRLQRLYEILLGEGDSRMFVATNTDNSPTLTPLSSSSSSSPESDPSHQVPTYLNNNNNHHLSIHYQPPPTEQHTYTYSFQEHRFARQLHRYTLEHAYRLFTDPRSNPSTIYRVFRLVPCIRDPQKTQPRFKQLLMGGCDDPLEVPGLPFYGVGGAGTHFPGFVGYVLMRNVGLLPGLVILGRAPGFREVDVKRALQASVRKVDHK
g701.t1	OJZ80980.1	OJZ80980.1 hypothetical protein ASPFODRAFT_146702 [Aspergillus luchuensis CBS 106.47]	Aspergillus luchuensis CBS 106.47	89.8	402	37	3	19	419	8	406	6.47e-260	720	MSTSSTTTTIHPQTILIMISVLALPIYLALLQQRLRYRRQTAIEAPFTAPAHKRPLSSMTIKEAHAIITQLQELEFPYAFAKARRMALLKAGGIPTMSKLFAVTGQNNRRNAGKRAVDTEILLQESQSQRRDSDRYAAAVARMNYLHARYRRANKITDDDLLHTLGDGLAEILNVIEREEWRGLTDVELCALGIFHKNLGEDMGIPFDVLPSKEGWEDGMQFALELTRWTVQYEERVARLTQTNDQYVRVYVDSALPGVIRPVVRRMLGGDLDDVMRMSLGLESPGYFLSFVINVVRTSRKLFLRYLALPRPAFRAVKLVHDRPNQETNLYNFERKVLHPWYIRPTVWSRWGPGALVVRLFGGKVPGSRGDRYQPQGYDLMTIGPEPQKGRGLEEMRAD…
g702.t1	GCB20245.1	GCB20245.1 nitrogen assimilation transcription factor nit-4 [Aspergillus awamori]	Aspergillus awamori	90.1	182	12	2	1	182	1	176	1.82e-102	302	MAQQGSGKPFRPIAPRRIPEPPTPAAAPEEGKIKRASTACGECKRRRTKVKTPLPLPSLARLVHPSDTTGTPCAECALHDRECVIDEFADKRRKVAAKRAQEDLKYYRGFVEQLLEALRYSDHATIDGILDVIRSGATHDEIRAVLARSAPKDGINIPDGVDSVATDGNNSPPANSKPDGIP
g703.t1	OJJ77561.1	OJJ77561.1 hypothetical protein ASPBRDRAFT_190856 [Aspergillus brasiliensis CBS 101740]	Aspergillus brasiliensis CBS 101740	99.7	729	2	0	1	729	1	729	0	1360	MADALEYLAPDFDLNSLTVPRLRSILVNHDVPYPASAKKAQLIGILEAEVLPQARKLLRERDRVRRTSEGITDMGSRATSVVSDYDAQREVPARDSMPPPPTPSTVSTATGRRGRSRASVRASTADTEERNATATPSASSRKSIPRSQSRRYRTSDTEPQEDMLATPVATGTMTPQKSTTRKSRRSEMTPSVNPEPPVSAIKLEPKEDSVFTDDNPFQSGSPARWEYKSPRPSSHKSERKSSSRFSLESPALSSGLRSRKSVTPADLHDQHSATPSKRSPFEFPISNSRTPPQNYDPIKYEEDSDFSVGEEFTPEEQLALEREHADLMYSAPSRRPQKQGTASRAAPWVILVLLFASFGAWWRKEKIEIGFCGIGKPTWSLAETRVPEWANVLEPQCEP…
g704.t1	OJJ77562.1	OJJ77562.1 hypothetical protein ASPBRDRAFT_240975 [Aspergillus brasiliensis CBS 101740]	Aspergillus brasiliensis CBS 101740	99.9	2092	2	0	31	2122	34	2125	0	3906	MSSGSPTFTYVLVNAVIPFLDHVAAQSLQAPDPQTCTSPTIKDPNDLYSSIFSWGSDFAPKDQRKPPQFGSHRKALNLLGPEDPGTSPTANSNNRPPQLNLNPPDNSQQDTEPSFASSPTMAPNDGPSTFFNDYSEQEASPASNLFRPGTAQTYASEPLELDYNGDHRRPSVASAMTVSSQGSKSSAGALFKKKLQGFFGDEYVGNGDPRHDSDNITQNSTTKPSSLDQFRARERANSDGSRNPGTSPAPNQARPHTPLPSSEITPWLYQSFNDIPQYGEAPVREAPTTTAEGQRGSVSQRDQSRRHFSGHRHSRSKEEKPTAAGDLAGYSNRPATGRDDLSLGLRPSREGSLNYPTPMTSTTTLVGRSTSPTPSVQSAYSREQGQNSPGAQTSKRSFL…
g705.t1	XP_001394158.2	XP_001394158.2 cell wall glucanase [Aspergillus niger CBS 513.88]	Aspergillus niger;Aspergillus niger CBS 513.88;Aspergillus phoenicis ATCC 13157;Aspergillus niger ATCC 13496	98.1	366	7	0	1	366	1	366	5.77e-258	711	MRLPLVSSTLALLSSASLVAAQTYTNCNPLKKSCPADPALGKSASYDFTQGSSSDFTATGSPTYGKNGAEFTVASQGDAPLIQSNWYIMFGHVEYVIKAAPGTGIVSSAVLQSDDLDEIDWEWLGGNDQLVQTNYFGKGDTSSYNRGATHNDPGNHDDFHTYTVDWTSKQIVWQIDGTTVRVLTPDTADTNQYPQTPMVVKVGIWAGGDPSNPQGTIDWAGGTTDYSAGPYTMYLKSLKVTDYSTGSSYSYGDETGDWTSITANGGQVNGNIGADTMTSIESAPTVTSTVASIPIPWSGTHRETSSFVTPDVWPWVATATSTSLPAGWTYSGSRQIQPPSAASVIFFPVYISLLAISAGLILPLRL
g706.t1	OJJ77565.1	OJJ77565.1 hypothetical protein ASPBRDRAFT_70934 [Aspergillus brasiliensis CBS 101740]	Aspergillus brasiliensis CBS 101740	63.9	404	13	2	1	271	1	404	3.30e-165	474	MLEYLAAQTSPMKASACLVGVFFLACPLRKIQVSLKISRLGLIAPRIRFRLPYVIITKDPENIKALLTGQFVDFGKGEGFRHDWKEFVGDSFFVTDGEQWSRWRQLIRPMFTRHRIVDTEPFDHYVHHLIPLLAGAKGNKVVDVTPLFLRYTLDIATAYLFGESTKRLGIRRVTRPPGSQGYFDPGKWIPERWMGGWVPKAWHFIPFNGGPRICLGQQFAMVEMGYTGVRILQAYESLSAVPPAGKDKVEHPLLKFQVTLDAACELNCVFE
g707.t1	OJJ77566.1	OJJ77566.1 hypothetical protein ASPBRDRAFT_36773 [Aspergillus brasiliensis CBS 101740]	Aspergillus brasiliensis CBS 101740	97.1	489	14	0	1	489	4	492	1.34e-310	855	MVAAGTPLAEALGHVIPPKLVEMGWSSDGGDDSALTEYVILMLVNGKTQEQIAGEISHDLLGGLGEGDTQALDFSRWLFEQVEILNQQINGGGAPAPNEPSSAQAIPSFGDQESTPTQMSGFDGNAQDADMSMGDATQGDSIPTGPKAMRNGRGGGRGRMLNQINRSMDRGDSALHRVRGQAGGRVNSHGREHGKGRFNQNGGGRMSGGRQMGGMNMPGMMNMTQSDQMHLMSLLEEQARMMAQIMPGFVPPAINPAFQQNGSQQGRSLFDRVERQHGHRHRGQRHNNHHEQSGDVDMDTKPDQAGQEGGQDESNTNSVCRFNLRCTRRDCPFAHQSPAAPEGAPVDVSDICTYGAACKNRKCTGRHPSPAVKSAHQAEELCKFFPNCANPHCHFKHPS…
g708.t1	OJJ77567.1	OJJ77567.1 hypothetical protein ASPBRDRAFT_190862 [Aspergillus brasiliensis CBS 101740]	Aspergillus brasiliensis CBS 101740	99	595	6	0	1	595	1	595	0	1169	MRLPCASSRVFRQVRVPLALSRRGQRHALHTKQFDAAVIGGGITGLTAAYQLSRDPSCSKVTLYEKSSHLGGWLSSEQIPVPGGHVVFEYGPRTLRTSAPSCLPMMDLIMQMDLLDDVLISDKKSPAAQNRYIYYPDHLVRLPFPPTEGLLKTAWTLLMEPLFETFIQSALFEKSKRAVSGDVFFHDESVADLVSRRLSPKISENLASAVMAGIFAGDVNRLSAEMAIGYVRELEKRYGSIVDGMMTQRASETRAMPMDEFLALESLAPNRDARYWKSLRAVVSDASVLTLRNGLGQLTDALAAQLRSSSNVEVLSGTEVTSLSQNPDTRDLTIGFGKNESKTHNRVIATHAPSSLARQIENTKVGVVPSDTIRDLAQNNYAVTVMVVNLYYEDPDLVP…
g709.t1	OJJ77568.1	OJJ77568.1 hypothetical protein ASPBRDRAFT_25222 [Aspergillus brasiliensis CBS 101740]	Aspergillus brasiliensis CBS 101740	99.1	220	2	0	1	220	1	220	2.04e-137	394	MASNKPGVVSSSGITTNESTGERYIPSSVRADGSKRREIRVRPGYRPPEDVELYKTRAAEAWKNRGKGGVPGADGLKDEEDTSANKAGSATNNKNAKRREARKKAKATQDGATNGKDVTRIENWRAGAPEEAKKQSNGAEKDAARPEEAVDPEAEKEKKARNLKKKLRQARDLRDKKAQGEALLPEQLEKVIKIQELIRQLDSLGFDSNGDKKEAAEEKE
g710.t1	RDK37887.1	RDK37887.1 ubiquinol-cytochrome C reductase [Aspergillus phoenicis ATCC 13157]	Aspergillus phoenicis ATCC 13157	93.3	90	6	0	1	90	1	90	1.50e-56	179	MAGAGVPVTDRFRYLPACLPFHSGYSVDNGRPGLIRRNAVYLTTIFASAFAFELTFDTASNKIWDSFNRGRQWKDIKHQYLNKADEEDDE
g711.t1	OJJ77570.1	OJJ77570.1 hypothetical protein ASPBRDRAFT_112835 [Aspergillus brasiliensis CBS 101740]	Aspergillus brasiliensis CBS 101740	99.8	2151	4	0	1	2151	1	2151	0	4205	MGFTDKEMILGQGLLRLPSAHNYRYGFNAEQDLLELLFHSLTGFNEEYLRLLFPKGPPKGIWKLAEAQGAEEGAEYTEAARGKRCGHIFRAGEATYRCITCAADDTCVLCSRCFDASDHTGHQYQISLSSGNCGCCDCGDEEAWRLPLFCAIHTDSEDKKGKQRAQTQLPPDLVDSIRTTICGVLDYFCDVISCSPEQLRLPKTEEGIRQDEEASRLRPGWYGDGDLPEDEPEFALALWNDEKHTIRDVAHQVSRACRERDRFGNDRAHETNDIGRSVVKYSKDLQRLLAVSKIIEQIKVTVTIRSARDTFREQMCGTIVEWLADISGCSIMDDNEILRHTICEALLSPWQQRSNAANADIGMKGIDDHQRTENAPYRTVMLTVSPQGQVVLAADDDDD…
g712.t1	OJJ77571.1	OJJ77571.1 hypothetical protein ASPBRDRAFT_112378 [Aspergillus brasiliensis CBS 101740]	Aspergillus brasiliensis CBS 101740	100	331	0	0	1	331	1	331	1.17e-237	657	MSPPAAIFEPTVVPTGIKSNVVVPESAPVTGASQTKLLDHFAGKWDNFKFAPIRESQVSRAMTRRYFQDLDKYAESDIVIVGAGSCGLSTAYVLAKARPDLKIAIVEANVSPGGGAWLGGQLFSAMVMRRPAEVFLNELGVPYEEDVANPNYVVVKHASLFTSTLLSKVLAFPNVKLFNATSVEDLITRPAANGDPKETRIAGVVVNWTLVTLHHDDHSCMDPNTINAPVIISTTGHDGPFGAFCAKRLVSMNSVDKLGGMRGLDMNSAEDAIVKNTREVTKGLIIGGMELSEIDGFNRMGPTFGAMVLSGVKAAEEALQIFDERQRECAE
g713.t1	OJJ77572.1	OJJ77572.1 hypothetical protein ASPBRDRAFT_36779 [Aspergillus brasiliensis CBS 101740]	Aspergillus brasiliensis CBS 101740	99.6	482	2	0	1	482	1	482	0	995	MSTISDPPSSSPSSTPTHIRIFTLNCWGLKYIAKHRHTRLAEIGRQLAISSPPPEIVGLQECWTQQDYESIRQQTRHILPYGKFYFGGIWGAGLAILSKWPIEESSMFAYPLNGRPTAFFRGDWYVGKGVACARIRFGPGVQDVAEVFCTHLHAPYEREPNDSYICHRTAQAWEIAKLMRGAAERGHLVIGLGDFNMLPSSFAHQLIQAHSPVRDAWQVLHPDSSVGAAIDPVEQKRGKPVPSAEYNLIENGATCDGKFNTWRWSKEDQKRLEKGQDIVVDKDAPCPKGKRLDYIFVGDGNYPPLYPAPRWSVESTRISMTERHPTLRCSLSDHFAVEAVITRTPSEKVDYDDDNTTTSVHQSPAPNTALTPDTYDRIIDMIHTYVRRERSQRRWRVAH…
g714.t1	OJJ77573.1	OJJ77573.1 hypothetical protein ASPBRDRAFT_36780 [Aspergillus brasiliensis CBS 101740]	Aspergillus brasiliensis CBS 101740	99.7	582	2	0	1	582	1	582	5.23e-308	856	MDGSMHRSKRRRLDTTPKPQNGFIHSPVESSSDELAAGSDHDEAERRRASWSIQKAYPPQRPYRRSRSFSGSESPDELAVDAKEYWSARNRGRSPSSPSEPSAEPSSERYLDHDHDEAEEEEEDEAPEPELDPEIDPEQEDGGAEGDVEETATAADGDVAVDQSFGERSPTPVPQPPPPPPKPDKVNYHQKYLLRGHLRGVSAVRFSPDSSMIASGGADGTIKVWDTVTGRLIHTFEGHLAGISTISWSPDGATIASGSDDKTIRLWNVLTGKAHPIPFVGHHNYVYQIAFSPKGNILVSGSYDEAVFLWDVRSAQVMRSLPAHSDPVGGIDVVWDGTLIASCATDGLIRIWDTATGQCLRTLVHEDNPPVTAVKFSPNGKYVLAWTLDDCVRLWDYVE…
g715.t1	OJJ77574.1	OJJ77574.1 hypothetical protein ASPBRDRAFT_50437 [Aspergillus brasiliensis CBS 101740]	Aspergillus brasiliensis CBS 101740	98.9	283	3	0	1	283	1	283	5.54e-196	547	MVSFKSLLTATTLATAVLAIPHGGHGHGSHKHRSTHVASKRSSSSKRGAAYTTASNVHTLSSGASGNGTVSWAYDWNMYADGSLPSNVEYVPMLWGSKMFGGWLTAIETALNSGSNYIMGFNEPDASSQASMTASDAASSYKKYITPYSGKAKLVTPAVTSSTTEGEGLSWMKSFLSECSECDMSVLAVHWYGTSADEFKSFVQEAMQVAEDNGLDETWVTEFALTGDESGSGDQSSAADFLDEVLPWLDSQSGVGRYAYYMCADGYLLSGEELSSSGKVYVA
g716.t1	OJJ77576.1	OJJ77576.1 hypothetical protein ASPBRDRAFT_115104 [Aspergillus brasiliensis CBS 101740]	Aspergillus brasiliensis CBS 101740	97.1	548	16	0	20	567	516	1063	0	1041	MANTSTESRDLYGIVDMGSNGVRFSITDISPQAARIMPILFQDRAGISLYDAQFSGPTRGPIPPHITEQVVDRLAQFQLTCDDFQVPKENIYVLATEATRTASNSEEFRAQIKDRTGWEVTLLSKEDEGRIGALGIASSSASVAGIAMDLGGGSTQITWVMETEGTVTTSPKGSFSFPYGAAALTKRLEEAQKQGKDAVRELKNEMTRNFQDAYRQLDVPEALVDMARSRGRFDLYLCGGGFRGWGYVLMKQSKVNPYPIPIINGFRVQREDFHDTVSVLDVVSDSSDEKIFGVSKRRASQIPAVAVLVNVIMDALPEITHIQFCQGGVREGYLFDRLASEVRAQDPLLAATAPYAPPSADAIRDLLQSALPTSPSPISSIHPPPSFTPNLIASIANLL…
g717.t1	RHZ63939.1	RHZ63939.1 hypothetical protein CDV55_102778 [Aspergillus turcosus]	Aspergillus turcosus	68.7	294	88	2	1	291	1	293	1.27e-146	423	MAGQAASDEGCVACGWTHDKQLQSSYDSHLKLFYTAHDHGVWSIGTDVILKERPYDGSRNEAKALKLLASYSQNPAPELLHDWVDQDGRYFLLQERMDGDTLETVWPTLTDLRKVAIADQVAGVCKRLQFITSPRIERVNRRACSSALLFGDSEPRGPFRSDAELWDAVSLPLRQRSFPQKALDNLQKRFPQYASYVLTHGDLSIGNIMVKDGQLVGILDWEHAAYYPLGYEYILASWGVNAEDVAWKRLLQQRLDLKDSAKWFWMELYHLRNYPNLDEEGKEVLERLSAQ
g718.t1	OJJ77576.1	OJJ77576.1 hypothetical protein ASPBRDRAFT_115104 [Aspergillus brasiliensis CBS 101740]	Aspergillus brasiliensis CBS 101740	97.7	515	3	1	1	506	1	515	0	986	MGFFGKREAASNPTGHVDAIVEAPVSDPEKQQVTHDEDFHTALPQIPQATTTIDPAVEARLLRKLDLRVPTLLGFLYLLSLLDRSNIGNAKIAGMEEDLHLTGNRYTWLLTIFYISYTLFEFLALMWKIIPPHRGIVATCQAAAQSWGGMMALRFLLGMSEAAFGPGSPYLLSFFYRRQELGLRCGLFLSAAPLANTFAGALAYGITSGHAKIANWRLLFLVEGSPSLLAAFLAWFYLPDHPASARFLTEEEKEVARARSLRRSGESERVTGINWKELWETMQDAKAWLTALMYFSCNVSFSSLPVFLPTILEDMGFTSINAQGLTAPPFFASFLVTIATTWLADRLQQRGLVIALSSLVGAIGYVLLATCTSVGVRYFGVFLAAVGVFPSIANILPWV…
g719.t1	XP_026629650.1	XP_026629650.1 hypothetical protein BDQ94DRAFT_138174 [Aspergillus welwitschiae]	Aspergillus niger;Aspergillus awamori;Aspergillus welwitschiae	97.5	692	17	0	1	692	1	692	0	1312	MDDPASRVPAQLLPHMHLVSRHRYPLMHMMPTDTVVEYLLSAPKIVREAQPMHWTFLDGPQDGTVMLTWQPLTQLGTNFASDGYVWADVEQAFTFEARGYLVEMWLHRSGYHPPNETLAIHCRRRYRLLPSKVPNPNVPPPDPSLWIVHYSRGPPTDHIPANRIPVMPPIQNMLAQRRFLQSQGQLARKDFMLHDRNNWPAINFPPQMAPQGFPQVPGAYPSAMVGRQQFYPPPGPGVPPPAAATPAKAARGHRASSAAVNAATADFALEDEDVSTGDAMDLLTPREISKMRYQQHHEWMEEIFASPYAINQITPVSLGLGRKGELESLTAGFFDAPVGPANGETKDANTATQAAEKMEPAKAEEFADRVAKKVADMTAEIEKLKKRHARRMEKFNRTS…
g720.t1	OJJ77578.1	OJJ77578.1 hypothetical protein ASPBRDRAFT_25232 [Aspergillus brasiliensis CBS 101740]	Aspergillus brasiliensis CBS 101740	83.6	907	6	4	1	773	1	898	2.83e-300	857	MCLPSLSDSLSLPKILNLDSSSRSSSPEPPPRFHDRHHHHSHHHHFRGRRRSSSACSTCSDTSTSTSTTTSISIRPPPRSYHPPQPSHKPPPPPPSRERERERDSYRTRRYKYRDIEETFIPLPPARPVRIVRPWPRPRLPPPPPPVVIDVREREREREYCRLPNVEAEELECVGVFEPEEEQERVEEWVVMRERGGWRRRPARERGRWKEVVEEDEVDKEVDEVEEDSRRKVRVEYIRATRNRNLSHRRRSSLTSRPRFRFSTLRGFQQPELSKKLNQVIKNENAAIGAHEKASRERVSIASQLSEWGEWTEDDAVADITDKFAVLMAEIGEQEDTFAQYLEEYRVVLKQIRDTENSVQPSRDQRAKIADEIQRLKWKEPHSHKIDTLEQELVRAEAQ…
g721.t1	OJJ77579.1	OJJ77579.1 hypothetical protein ASPBRDRAFT_50442 [Aspergillus brasiliensis CBS 101740]	Aspergillus brasiliensis CBS 101740	85.6	327	7	3	1	318	1	296	7.05e-193	541	MDKLVAQYTRPPHQNEFYSEQEQRDLTESLPPLSLKFNLPPVDNLARNRAEHRTDPPTCLLPIAETVTDILLNPQSRAFLRAMTDDHSNPSCPIKLAHGTTTLAFRFQGGIIVATDSRATAGNWIASQTVKKVIPVSRLSRGEDKPSNEPTPGLLGTMAGGAATSINPETEIRHKRRITVAAASKILANLTYAYKGMGLSMGTMLAGMTPQEGPALYYIDSDGTRLPGNLFCVGSGQTFAYGVLDANYHFDLTEEEALELGRRSILAAMHRDAYSGGYINLYHVKEEGWVHHGFSDMNPIFWNTKLEKGEFSNVTSEL
g722.t1	OJJ77580.1	OJJ77580.1 hypothetical protein ASPBRDRAFT_50443 [Aspergillus brasiliensis CBS 101740]	Aspergillus brasiliensis CBS 101740	100	1236	0	0	1	1236	1	1236	0	2501	MAPAATDTNWSVNYDVLRREKLFRNPPKDQTAYPALAAAIRPHVDSFNALFDGPKTLEAALKDIGTKTFIDGEAETPEQKKARQAEGRKAPKRNKLHVRVSEVFLEKPALPASNKFTTRNRNIYPSECRERHATYRGKLRARIEWRVNNGDWMESVRELGQVPIMLRTNRCHLEKATPHELVEHKEESEELGGYFIVNGNEKLIRMLVVGKRNYPMAIIRGSFVRRGHTYTKYGVQIRSVRPDQTSQTNVLHYLTDGNLTFRFSWRKAEYLVPVMMILKALVETNDREIFEGIVGSASSEGIKNTFVTDRVELLLRVYKAYNTHSRAACRAYLGEKFRPVLGVPADMSDEDAGTEFLRKVVLPHLGNQNVTENQDYDKFKMLLFMIRKLYALVAGDCAP…
g723.t1	OJJ77581.1	OJJ77581.1 hypothetical protein ASPBRDRAFT_50444 [Aspergillus brasiliensis CBS 101740]	Aspergillus brasiliensis CBS 101740	100	183	0	0	1	183	1	183	2.52e-131	375	MAGIFRTIYDWLLRMFWATEMDVTMIGLQNAGKSSLLRVLAGGEFTVDSIPTIGFNTKRVQKGHVTLKCWDLGGQPRFRPMWERYCRGVNAIVYIVDAADRAALPVAKEELHELMNKETLNGIPLLVLGNKSDLPDKLSVDDLIHEMDLKSITHREVSCYGISAKEETNLDAVLHWLIARASR
g724.t1	OJJ77582.1	OJJ77582.1 hypothetical protein ASPBRDRAFT_50445 [Aspergillus brasiliensis CBS 101740]	Aspergillus brasiliensis CBS 101740	100	152	0	0	1	152	1	152	1.51e-83	252	MGVLLRRRDCYYTVNGEVCDGSTWYDWGRWIAFAVIVAVALIIFFLFACYNARRRRRQGLRPHPGTAWLAGPPPTFQQSQQQAQQQGQRPYYADPYYQQPPPPQYTPHPQAYGYFGGQQTGIELQQPPNAYHGGERVYQPPSGPPPEATSKV
g725.t1	OJJ77583.1	OJJ77583.1 hypothetical protein ASPBRDRAFT_25237 [Aspergillus brasiliensis CBS 101740]	Aspergillus brasiliensis CBS 101740	87.6	418	20	2	1	391	1	413	5.67e-202	575	MSPVDKAPVSLWARDVVSDLKSDASTFTSWDKCMSKAYCKWPVIVAIIIAALILLSVIACRKRNKQKYLDDQYDQPPPMPAMPTMPAPMNNAYQTPYQPQAPPVYRGAEVARFDTPSTPATAKFDEDALPAMPTWDSAVTKKVEDEDPHAESLEMKPLSNANQEPRRMPSGARSVAGGYGGPPPSRTATPAAPGAYHAEPRGYDGYGGQDAYGYHTPGPRSPPPVSPYEHQPYSEYPHEDRFHSMSPAPTYTTQPQYMPMDSTQSHHAPMDGMQPYQMPMDGMHPHYMPPEPAHSHYMPMDNMPPHQMPLDTGTYGQPMPVNRTYSPAPTLHSAMNAPRPVPYRQPSPGFQAPPYRNMSPATPTSPPPPFSTTPAPREANDPGRPPSLLQTTGLLTDAD…
g726.t1	OJJ77585.1	OJJ77585.1 hypothetical protein ASPBRDRAFT_25238 [Aspergillus brasiliensis CBS 101740]	Aspergillus brasiliensis CBS 101740	99.1	559	5	0	1	559	1	559	0	1112	MASKIVVIGDVNCELQDVFTKLSKLHIKQNFSFAIIVGDLFGDCSTEHELEQISALLQGNIVVPLPTYFTLGSRPLPTRIIEAIESKDEVCPNLYFLGRRGTLKTSEGVRLVSLGGTLDPDAKSPDKYHPSYTESDARALYGAHQADILITHQWPKDIRTGSKAPFPDTTTPPTEVQCVADLCSTLKPRYHLSSSSDFFWEREPFFHLPTEDTDNPDAKPLTRFISLAAYSKTTKTKWLYAFTLDPKAPPALTIPAGTTAPPFAPIPTKRKPLQSQRDSYQRFAVDDDHDNRPRKRRARAPPPGPDQCFFCLSNPNIATHLITSIGDEAYLTTAKGPLPTSKTFASSSLTFPSHMLIIPFTHSPTLSSISDPQSRQSTYAEMHRYRSALHSMLRRRANN…
g727.t1	OJJ77586.1	OJJ77586.1 hypothetical protein ASPBRDRAFT_50448 [Aspergillus brasiliensis CBS 101740]	Aspergillus brasiliensis CBS 101740	99.7	2611	8	0	1	2611	1	2611	0	4991	MVAASSSSRAKPVKRVKGGTETTKSHRFEPFSQRVAKLKIDPIHRVRRPSFGEEADETSSYFRSAFEHWVELNLSDNFVHFVRKVNPLCESLAQILYHEDKIMNLLVEFIEKRDSLSIEPLLGLMAQFARDLGVRFEKHFATAVTLVASVAASHSDVEVVEWCFSCLAWIFKFLSRLLVPDLRQLLGIMTPYLGKERQKTFVARFAAESMSFLIRKAGLVYYKNATPLQRAVSFLLDDLRQAAEDEKNVELYKEGLMAMFADAIKGVKYGIHSNGADILSCILDNISTGDDLRGSLGLDVASGVVINIIHSTTPDTFEPILDLIKAHIEKNCRKGEKQHATACCRLIFLCVATRKGTRVKNWKPVHQTLLLLLQNAASAPSAYAEATPQLLTAVAYALQ…
g728.t1	OJJ77587.1	OJJ77587.1 hypothetical protein ASPBRDRAFT_242006 [Aspergillus brasiliensis CBS 101740]	Aspergillus brasiliensis CBS 101740	95.5	199	9	0	1	199	1	199	1.40e-120	350	MRPFTSLPRGLRTIQSSVPRATSSITRASQQSISRPFTQLLHRQTPTIHSQRLPTRVTTHLTTTRLNSSSSAKPLTDRASDASTDAQNEEQNRLRREQEPAYQITFTCKPCGERSSHRMSKHGYHRGTVLIKCPSCDSRHVISDHLNIFFDKKSTLEDILARQGDKLTRGYVDGDMEFWDDGSVKKKEGEGEGEEGKSA
g729.t1	OJJ77588.1	OJJ77588.1 hypothetical protein ASPBRDRAFT_113971 [Aspergillus brasiliensis CBS 101740]	Aspergillus brasiliensis CBS 101740	99.8	812	2	0	1	812	16	827	0	1503	MAVSKPHDFETSWTELSTSLKKIHTKDASALSFEQIYRKSYNMVLGMRGVELYERIQHLEREWLDTEVHKVVAGAISPSLLLARQQVDAQDQANERRDAGERFLAVLKEAWEDHQLCMKMITDVSMYMDRVMSTDHRMPSIYVASMALFRDHVLRAPIRPDTRTSVYDVLESTVLFMLQLERSGHIIDRPLIRHCVYMLEGLYETITEEESSKLYLTVFEPAFLEASKTFYQAEGRRLLETGDAATFCKIATERLSEETERCIDTLSSRTKTKIKDVLDNELIKNNITEVVNLEGTGVRTMLDNDRIDNLRSVYVLSARVDSKKTPLTSAVQKRIVEMGKEINASAIASQASAPSAAGKKSEAGEKKPAEKEKPVNQQTVAAIKWVDDILRLKQKFDNI…
g730.t1	OJJ77589.1	OJJ77589.1 hypothetical protein ASPBRDRAFT_50451 [Aspergillus brasiliensis CBS 101740]	Aspergillus brasiliensis CBS 101740	96.4	275	10	0	1	275	1	275	1.18e-177	500	MDIDDILASVDRTADTSTPESTALDHQLLTRFWVAERAVPELLPWPASLMERMMERVRRQIESIEDLAASSTDPIITTTTSTQSSTNAATTNLKLSILQSDLSRTQYLIRSLLRQRLSKLTAHSMHYLLLISRPNDTNTASQSQTDSSRPEDSIPEPPDTKDDEDTSPLSKEEVTFLHAHQTLLAGHYGSSFLNSFPPQLRRLDDNAGGTSMVQGPEGKEIVFVRCLVEEVRVVVPPGDGIEVEVEGTVMRMGEVWAVRWEGVKGAWGRGEVEVL
g731.t1	OJJ77590.1	OJJ77590.1 hypothetical protein ASPBRDRAFT_242076 [Aspergillus brasiliensis CBS 101740]	Aspergillus brasiliensis CBS 101740	100	556	0	0	1	556	1	556	0	1102	MEHSSPLAAMQPPSVMFGHCFRADAPASYTSFSPMRGLGHKNFNFKDLSMKKGHGDYFNVKPVRGSSPTASLAADLSQNFHIDQSPQLTTPRRSLFTASLLGNSNRCESMTTPPLPASSPAPTMDIMDMSPLPHKPAFGLLNEAELDSPSLDSTMDTPMMSAAPSPLEESPLVQQKDSLQERRRPTFLRPSLARSKAQTFQLGMTKPAPESQAPPFKFQSKGGKTSLSASASLEDMFNESPQRERHSLSRHSSGILVNPRLRPQLGNSGSHVRGNGSPTAASIRKNSHPMMRPRKQCRRSLSMFEHPEDIVVEKEANYTTNAPLPSITDIEGTPSLQLPHTFSEDQADTLPRIDKSILVELLDGKYNDRFDNIMVVDCRFEYEYEGGHITGAVNYNDKD…
g732.t1	KAI2935602.1	KAI2935602.1 hypothetical protein CBS147321_8883 [Aspergillus niger]	Aspergillus niger	70.3	643	184	3	1	639	1	640	8.67e-238	682	MDFYDTSLDSLPAEMIIRIGEYLQRGSLAAFIRTAKRYAQLLTPQLLTQWVSCGTGNYCHKLYFYETGHWKSSHILAYFQNFPSDVSRRHCCSTLLYRFADGGNLDLVKLMLSRGANLEAKGPWKQTPLHAAANRGSLQVVQALVEAGADISTKNEYGYTILKTAASMGKPEVVRYLLSSGQYTQEALVEAFERGMESYSPDVCEEVWSALENTGYQLNTTSTKGQIYLHVAAQKALKPLVQFFLDKGHDPFRVDEDGNTALSMACSNVMFRSKNDIETPKLLIKAMQATGRDPFRANKQGISPLHKAIQKSQIDLVRLFLDSGASVTARGKNGIKCVEQVLEGSRELFELLVEREPALWLSRMLESSLQTYAAKVGNGRSSLSILKAIARILRIARSG…
g733.t1	OOF99139.1	OOF99139.1 hypothetical protein ASPCADRAFT_127704 [Aspergillus carbonarius ITEM 5010]	Aspergillus carbonarius ITEM 5010	69	422	120	2	19	434	95	511	9.90e-209	597	MREEGEAPNCISNLELRKIPYQLIENVEDLSLYCPGGYHPLQVGDELNEGRYRLVHKLGYGGYSTIWLARDLRLSKYVAVKVIIAFASGDTEEPDLLRYLRASSERPGGDIVCPLLDEFWVDGPNGRHKCLVTPPARMSLFEAKESSSIGLFQPKVSQSIIAQLIRGVAFLHSQNIVHGDIHLGNILVEFPKPIDPLSTPELYLRYGEPESEPVIRDDGKALPNSVPAKAFLEAWCGIESNELPLGEEKISLCDFGVSFNPYKTSQYSSETLVFLRPPESRFSDKPLSFSLDIWILACTIWEISGTQPLFEVFLPSNDWVTREQVEVFGILPSEWWKKWDKRSERFNEEGELKLDRENMSKGTMRNTWEVRFNHSIQEPRAKAGLETMTVEEKSAFEAM…
g734.t1	OJJ77594.1	OJJ77594.1 hypothetical protein ASPBRDRAFT_113074 [Aspergillus brasiliensis CBS 101740]	Aspergillus brasiliensis CBS 101740	98	984	20	0	1	984	1	984	0	1771	MAQNYAASKKRRREPVNVDTKLVEIYEDLANEKDEIRLKAAQALVSQFTSDKSPADEQIKKTLQRLFRGLCSSRKAARIGFSIALTEVLSQVFGAPRDSSELNISTVMNIWESQSSASGGESGQEQRDHHFGRLFGAEAIIKSSVLFKPNAPFNEWTKLLNMVLDLAKKKPWIREECGWIIYRCVYELAAQKADVKFLDSALEQLYSNELARTPEGVAIWLAAKDLFPNAKFPSKVWKHDDPLDAKERNQLAKVMKESSSADSEGESGNKAKSSGVWNSKLHFAWDTVISRLADAPTKESKSKGSSSRISFADFWTEVVDNGLFAASSSEERKYWGFLLFNKVINESPLKLASLVFTKNLVRCLMNQLAVEDRYLHRMAVKAAKAVQARVSKEPEFAAA…
g735.t1	OJJ77595.1	OJJ77595.1 hypothetical protein ASPBRDRAFT_112701 [Aspergillus brasiliensis CBS 101740]	Aspergillus brasiliensis CBS 101740	99.1	349	3	0	1	349	1	349	3.18e-251	692	METSTLLLLTTLTILLLPLLLSPKATHTLKHKLNLLRHHHPKPTTIHSLYIYPIKSCRGIRLPHTTLHKHGLSLDRRWMFIDAKTNQFLTIRQDSRMTLITTALSPDSSHLIISIPSFSKDQEISLPTEPTADWLAQHTTLERVTIWDTVTDAYAYGPEVNALFSEFLGREVKLVYKGPERRILRGNGAPEILGREQDTYFPDVHPVLIASAASIEELNGRLVNGGNEAITIERFRPNIVVTGDVPWEEDSWKVVRIVGGDNNNKQKVELDVVARCARCQVPNVDPDTAVKNARQPWDTLMKYRRVDEGIKFKPCFGMLSAPRQEGRVEVGMKFEVVEVTDGHRYIKGF
g736.t1	OJJ77596.1	OJJ77596.1 hypothetical protein ASPBRDRAFT_61137 [Aspergillus brasiliensis CBS 101740]	Aspergillus brasiliensis CBS 101740	98.2	275	5	0	1	275	1	275	1.36e-192	538	MGDYGHGVSSLTAQIPGNPPASGTDQDEISVLVTGFGPFKSNLVNASYLIASSLPPSFTFSPASSEGSDATPRRVSINVHPSPIPVAYSTVRTTLPVILDDYAKTHGGRRPDIVIHIGIAAMRNYYSVETQAHRDGYLMSDIKGRSGYEDGEKLWRELDLPLVLKAGPSEGHASEKKPLSPRPPDTDFLAAWKSFCPPETDARISTDAGRYLCEFILYTSLALAYQAGEDRNVTFFHVPASCLDEDIETGKEVAVALIKALVISWSEQQHSVSSI
g737.t1	OJJ77597.1	OJJ77597.1 hypothetical protein ASPBRDRAFT_50458 [Aspergillus brasiliensis CBS 101740]	Aspergillus brasiliensis CBS 101740	99.4	516	3	0	1	516	1	516	0	1032	MAFITEVLDNQHLLQGVILAIVLVFVSSFYHELADSFPYKNIPLVGKSKWEITNTKAKHRFVTSAKELFAEGFSQGRKSFQVVFSARPTIVLHPSLVDEVKNNPLLDFNEANKKSFFGSKVPGFEPFDGLDHEGIFLEVINKKITQGLGQLITPLSRETATVLNEKLPDTGEWLPFTFAQEIPHIVARLSSLVFLGEKICRDKQWLDVSVNYTIHAFVAARDLRLYPSILRPFVHWFLSSTRKTRQDIRVASGIINREVEKRKLIREGKLPEEDPPRTHADTLDWFEEVAAGRPIDIAVSQVGLSLAAIHTTSNLLTNVIYDLTAYPEHIQPLRDEIVAVVSEDGGLKKTSLTKMKLMDSVLKESQRMHPAGIAFLNRLAMGDVMLSDGTRIPKGASVT…
g738.t1	OJJ77598.1	OJJ77598.1 hypothetical protein ASPBRDRAFT_114195 [Aspergillus brasiliensis CBS 101740]	Aspergillus brasiliensis CBS 101740	99.2	659	5	0	1	659	1	659	0	1307	MACRPQGLSRTLPKNFTFSSSGEPRTPERVSHHLDVPPPPPRHSSCRLRRSRVRSGTDVFAQAEYDLSTFNPNSSDVPIPSIEVPSYDAFAGPSCPAFPSRDDRYLAPPRDRLAMKTPPAQIRPDPIEDNNTGAWSLEDSQALGESIQRPSSVCSQASDSSVSSIETFGSRRSAGGSCTSMESDSYDPFFHLELPPKTAPETPSLCRTRKNKARMLHAKERWTLDMDNHLWNIYQLYIQDPTITPFKMTPGSIPPLGVTHRVAREAKRTWERRRFRLDRQFPFTLSYQRPSSNSTPTPKVDAGKPTWPKSEASTRRRLKLLCRKKFSIAPHYQRMMQSRSPTPFLDLLSQPSGEPSNSCAAYATRDLGVSLVSSSVPGPLAQLAAEDSSPPEMSNEWFN…
g739.t1	OJJ77599.1	OJJ77599.1 hypothetical protein ASPBRDRAFT_25251 [Aspergillus brasiliensis CBS 101740]	Aspergillus brasiliensis CBS 101740	98.9	1218	14	0	1	1218	1	1218	0	2396	MAANEDHVNFDIIEGQKENIQSLPGGRSARELARIFSPRESTDILATPSPNDTRTVNDATRQEYETELQAIGESDDPLDIYDRYVKWTLNAYPTAQATQESGLLPLLERAVKSFLNSPHYKNDPRYLRLWLHYIRLFSDSPRETFAFLARHRIGEGLALYYEEFAAWLESAGRWTQADEVYRLGIDKEARPAERLVRKYSEFQHRYENHTQDNGPSSPALPAVRPALAAKVDPFASAASPADADPQAQQPAPARSAAPKTKSGKPKMAIFSDADSPSQPAVSAPAQGWDSIGSMHERRKENKVEAKPWAGETLKAGKKAAPAQKMTIFRDESNSNLQAKEALQSKHVPEHRVREAINPRTGRRERVFVNLEAVYPDYKNPNHEVSFEELRAISRGWMDK…
g740.t1	OJJ77600.1	OJJ77600.1 hypothetical protein ASPBRDRAFT_36812 [Aspergillus brasiliensis CBS 101740]	Aspergillus brasiliensis CBS 101740	92.6	570	42	0	1	570	1	570	0	904	MPPRGTRKAASTAVATEPPRSPEPGGNKRKPDETQELNSPLRRSKRVKSVEGLGTQSPSGKAAARTAPTESAAGSPKTTPRKSRGSRVVSVKKELEEEETISVEADLVDEGEGEVKDEEADEKPKVKAKVTRKRKTKEEIEMVPLRARTQGLRMCVGAHVSAAKGVFNAVHNSMHIGGNAFALFLKSQRKWDNPALQDDHRDQFRNLCIEHKYDGAKHILPHGSYLVNLAQEDKAKAKQAYDAFLDDLRRCEALGITLYNFHPGSANQTSHSSAITRLATALTNALEATSTVTPVLETMCGHGSTIGGYLHEFRDILSQIPQKHHHRIGICIDTCHSFAAGYDLVTPSGFASFMQEFSDVIGIQYLRALHLNDSKAPQGSKRDLHANIGTGFLGLRAFH…
g741.t1	OJJ77601.1	OJJ77601.1 hypothetical protein ASPBRDRAFT_25253 [Aspergillus brasiliensis CBS 101740]	Aspergillus brasiliensis CBS 101740	99.2	608	5	0	1	608	1	608	0	1083	MGVSPSGNHHRRRSSVLAGASQSVAIEHRDDTVRAIGDATASKREEPKSSPAEDADISDLSSIAESLEMDYISSDDDLHDDEETGLTAKQRRQRRRRRQQRRQLDARIADVKASKHDALPLGFTESDVFKRLSINAGLILLWYFFSLSISIYNKWMFSDDDVVFPFPLFTTSLHMAVQFTFSSILLYLIPSLRPKAPAASTATGSPVSEHDPFESRPVVTRFFYLTRLVPCGAATSLDIGLGNMSLKFISLTFLTMCKSSALAFVLLFAFVFRLETPSVKLIVIIATMTVGVVMMVAGETAFNAVGFVLVIASAFFSGFRWGLTQILLLRHPATANPFSTLFFLTPVMFVSLIVIALAVEGPLEIAAGFQALAAARGGLLAVFLLIFPGILAFCMISSE…
g742.t1	OJJ77602.1	OJJ77602.1 hypothetical protein ASPBRDRAFT_36817 [Aspergillus brasiliensis CBS 101740]	Aspergillus brasiliensis CBS 101740	99.1	225	2	0	1	225	1	225	7.01e-145	414	MADNKRHSVGARTSGQGTSGATAGQGMAGAMVPLEVALSRAIGARVRISTSPVASTIEGTLFTACPITNLVAINTAEEGKAQTGDYHVIPVSRIQSFQVLSLPSSNTDGASFSDAVPPLHALDIRALKAREAAAVGKLQESEARRGKGVTKEAQDLFDAFSRTMPARWDGSKIIVADAVSIAAPYRPDDCRPLVAGDTAALARVRMVLEMERKKIELRNASATIGTV
g743.t1	OJJ77603.1	OJJ77603.1 hypothetical protein ASPBRDRAFT_70964 [Aspergillus brasiliensis CBS 101740]	Aspergillus brasiliensis CBS 101740	99.2	508	4	0	1	508	1	508	0	1026	MATDFSARLAGINVGAPARPLPSADFGLIGLAVMGQNLILNAADHGFTVCAYNRTTSKVDRFLENEAKGKPIVGAHSVEEFCAKLKRPRRIMLLVMAGKPVDQFIESLLPHLEAGDIIIDGGNSHFPDSNRRTKYLAEKGIRFVGSGVSGGEEGARYGPSLMPGGNEEAWPYIKDVFQSISAKSDGEACCDWVGDEGAGHFVKMVHNGIEYGDMQLICEAYDILKRGLGLPAKEIADVFAKWNKGVLDSFLIEITRDVLYFNDNDGTPLVEKILDKAGQKGTGKWTAINALDLGMPVTLIGEAVFSRCLSALKDERIRASGLLDGPTPEFTGDKQAFIDDLEQALYASKIISYAQGFMLIQEAAREYGWKLNKPSIALMWRGGCIIRSVFLKDITNAYR…
g744.t1	OJJ77605.1	OJJ77605.1 hypothetical protein ASPBRDRAFT_111999 [Aspergillus brasiliensis CBS 101740]	Aspergillus brasiliensis CBS 101740	99	384	2	1	1	382	1	384	3.79e-235	655	MSFPPPPGLRQAPSSLPPRPPATASAASPSTFQPTYSAPPSGASSGYGGNGSRPGYSAITAFQPRSVASSQPYRTSSPVVSAAPTTSSGYSTPTTGSYGGYYPQAQASYQSGPSYYGAAQYNENTYGPSVPRIQNPFTPAGGDQSGAYGVRGRNFGRNDSGLDPETEAQIAQWQSAYVNKEEMPVAGKVPGRPGATPGVTGPASGANTPSGSNTAANTPAPTVGNPEPAPKTVVRAGGGQSWTDSTLLEWDPAHFRLFVGNLAGEVTDDSLLKAFSKYTSVQKARVIRDKRTQKSKGYGFVSFSDGDDYFKAAREMQGKYIGSHPVLLRRATTEVRPVSNTKNGKKHGSGGGGSGGGSGSGKVKHDGVKKHGKTKGGLKIIG
g745.t1	XP_041548137.1	XP_041548137.1 uncharacterized protein AKAW2_80176S [Aspergillus luchuensis]	Aspergillus luchuensis	72.8	530	54	2	10	449	2	531	2.89e-274	763	MHLSTAPSRASKPPHSDQNKSDILFSYTSGRWLWNEAAQLLRRYQPFNIEELKKAAARSVDAKFCVNITKLPEGSYNKTFLLTMDNDVQVIAKIPNPYVSQQYVTASEVATLDYLRNELGIPVPRVFAWSSKKDQPVGVEYIIMEKAPGNELSKSWPTMDISDRVDIVSQLASIQTKVASANFSHYGSLFYREDIDGGIDIPGRADKFCIGPSCDIRFWEEERRFMDAFRGPWSSSEAYAMDVARREKEWISRIPKFLKIQGPLLFDLPQATGLTPQEKEDNLRRYQLTQLQRLYISKFRDIDQDVFSALSFPQALTRQQLIDFSGYTWDDDGLFLFREMMLRTWREWMELTGQPQSSCPVTFTADELETHAAEGKSWDDRRDLFGALDIPIDGWVHVE…
g746.t1	GCB20288.1	GCB20288.1 hypothetical protein AAWM_03173 [Aspergillus awamori]	Aspergillus awamori	85.4	198	26	1	1	195	1	198	4.20e-107	315	MSVRVFIYAYRKPGLSLATFQERYEAHINLVKRLSGDDFPLSHRRSYIARTTVDTPPAGATARNATTPATVFVGQQSDFDFDATAELTFADQPSFQAFMAKVTAPEAAAQIAEDEEGFLDRKMLSIAMIGEVVETTKKENENTTKMQENIAIAVIIIVLFIILAIAGYFIHSMKNRVAHSRKRAVDEESGGEAEG
g747.t1	OJJ77609.1	OJJ77609.1 hypothetical protein ASPBRDRAFT_36823 [Aspergillus brasiliensis CBS 101740]	Aspergillus brasiliensis CBS 101740	99.7	386	1	0	1	386	1	386	2.05e-293	802	MFLLTSQKRFGRLILYALGVLGIILIIWPLPYARPTVRIGARSARSQLEAIRNETLGVQKIFAINLPSRVDKRDNLVLGSSVSGFNIDWVNGITPDEVDPRTYPYNWNHDHKPTEYGARRAHVNAMQRIVHERIGSAIIMEDDVDWDVTLKTQLQSFALGVRALQGTDKKVTASPYGDDWDIIWLGHCGMECRTNEPFFVSSNDTTVLPPHHFLPYWRDPPPFGVPEYTRLTCAVNDAVCSIVYAVNYHGAQKILSALSVNPTGLADQIDIGAQFDVSLGRMCGNGYLRCFAVYPSLTGGYHPAGPSSKESDIHGGNEDVHPVSSHGVMYSTMLNVNRILNGEDTVVSNWDDAPAPVVNPANVSVAGGTMHMLDEGNMYTLSVVNP
g748.t1	OJJ77610.1	OJJ77610.1 hypothetical protein ASPBRDRAFT_61150 [Aspergillus brasiliensis CBS 101740]	Aspergillus brasiliensis CBS 101740	95.1	286	10	1	1	286	1	282	3.64e-197	550	MASSNSPQAVLSVRSILERILLDLDMRTLLTSAPRVNRFWSFVISESRPLQEALFLQPAKSRSCGSQEKIINPLLAEAFPGIFQRNTSVFPEHADSKLTFDTLDMVKDPSRTEVYMREDASWRRMLVQQPPARELGIVSHCGDKTGFRERCEIQASQTKVSETGSEPPDDGLRMELLFEILVFHSDFYGVMDCATVYWWGDRSGSWVREYMEGMGMCDASKAPDLILYAPLFIPGSHMIWNIESRVRTPALDYLRSFYRDNGMSPNLNVRDGWETIVRRRRKRWVQ
g749.t1	OJJ77611.1	OJJ77611.1 hypothetical protein ASPBRDRAFT_141513 [Aspergillus brasiliensis CBS 101740]	Aspergillus brasiliensis CBS 101740	96	568	10	1	1	555	1	568	0	1126	MHPHILCIGLLLACKAAAVSTTGSSTAASPLTTTLNITTASINTTVEPTPIPSADLIPPPPLYYPSYLPGAQNPEQGSNNSRSFPKGFWWGVSSASYQVEGAVKVDGRGPSIWDVFTHRAMSVADNQTGDVAINGYYMYKEDIQRIAAMGVPAYSFSISWSRIFPFGNGPINEAGLQHYDDVINTCLQYGVKPQVTMYHWDLPLYLQLSYGGWTSEQIVDDFVAYAKVLLERWGDKVWQWYTFNEPHSFCGEYPVPDGYFPRTTSIPDVQQPYWCAHYMLLAAGKTYQLARSMNITAPISIKNNGGYKLPRTASAEDAEAVERAWAFNEGWFADPLFLGDYPSRLKNFTSSFLPEFTTEERDMIKGSSDYFAHDAYTAAYYMAPDAGIDGCLSDPSNSL…
g750.t1	OJJ77612.1	OJJ77612.1 hypothetical protein ASPBRDRAFT_111891 [Aspergillus brasiliensis CBS 101740]	Aspergillus brasiliensis CBS 101740	99.2	1489	12	0	1	1489	1	1489	0	2914	MDSGRSPRSEPSSVLKEVEKKAPLDSSDSSSSALPSPGLSKKQSAISVEHQVSNENVIRQESSLQRQLTQQDIARALSQRRSTGAAGADDTDQIARLVSRMFGQERKANSEEEKTRHLGVVWKDLTVKGVGLGAALQPTNTDILLGIPRLIKGLLTGGRKSAPLRTILDDFNGCVRPGEMLLVLGRPGSGCSTFLKVIGNQRSGYKSVEGDVRYGGADAETMAKNYRSEVLYNPEDDLHYPTLTVRDTLMFALKSRTPDKSSRLPGESRKHYQETFLSTIAKLFWIEHALGTKVGNELIRGVSGGEKKRVSIGEALITKASTQCWDNSTKGLDASTALEYVESLRSSTDMAHASTLVALYQASENLYNLFDKVMLIEEGKCAYYGRTENAKAYFERLGF…
[truncated: 10,182 more rows]
